# Supplementary material for: Ratiometric sensing of BiP-client versus BiP levels by the unfolded protein response determines its signaling amplitude
Source: eLife journal article supplement (doi:10.7554/elife.27518), 2017-12-18
Supplement: supp [file elife-27518-supp-v1.zip]

Archive with 17 entries (17 files):
- elife_poa_e27518_Figure_2_figure_supplement_1.eps
- elife_poa_e27518_Figure_5_figure_supplement_1.eps
- elife_poa_e27518_Figure_5_source_data_1.xlsx
- elife_poa_e27518_Supplementary_File_2.xlsx
- elife_poa_e27518_Transparent_Reporting_File.pdf
- elife_poa_e27518_Figure_1_source_data_1.xlsx
- elife_poa_e27518_Figure_4_figure_supplement_2.eps
- elife_poa_e27518_Figure_7_source_data_1.xlsx
- elife_poa_e27518_Figure_3_source_data_1.xlsx
- elife_poa_e27518_Figure_4_source_data_1.xlsx
- elife_poa_e27518_Figure_2_source_data_1.xlsx
- elife_poa_e27518_Figure_6_source_data_1.xlsx
- elife_poa_e27518_Figure_4_figure_supplement_1.eps
- elife_poa_e27518_Figure_4_figure_supplement_3.eps
- elife_poa_e27518_Supplementary_File_1.xlsx
- elife_poa_e27518_Figure_1_figure_supplement_1.eps
- elife_poa_e27518_Figure_4_figure_supplement_4.eps
