# Supplementary material for: Ratiometric sensing of BiP-client versus BiP levels by the unfolded protein response determines its signaling amplitude
Source: eLife journal article supplement (doi:10.7554/elife.27518), 2017-12-18
Supplement: supp [file elife-27518-supp-v1.zip › elife_poa_e27518_Figure_1_source_data_1.xlsx]

## Sheet: 1C
	Figure 1C - Source data cell growth assay quantitations
		Tm (µg/ml)	cell growth (%)	s.e.m.	n	significance
		0	100		3
		0.025	72.1414	14.3319	3	ns
		0.05	20.7932	4.71261	3	**
		0.1	na	na	3	na
	Notes:	na = not assessed (for lack of growth)
		statistical significance of growth compared to untreated cells (GraphPad Prism software): ** p≤0,01 - ns not significant
