# Supplementary material for: Ratiometric sensing of BiP-client versus BiP levels by the unfolded protein response determines its signaling amplitude
Source: eLife journal article supplement (doi:10.7554/elife.27518), 2017-12-18
Supplement: supp [file elife-27518-supp-v1.zip › elife_poa_e27518_Figure_2_source_data_1.xlsx]

## Sheet: 2F
	Figure 2F - Source data µs synthesis assay quantitation
			Signal (AU)
		µs expression (hrs)	average	s.e.m.	n*
		0	0	1.23197	3
		4	19.2	3.47593	3
		8	43.2	6.07061	3
		16	77.6	5.7021	3
		32	90.4	4.95832	3
		64	100	9.69223e-06	3
		128	88.2	3.63376	3
	Note:	Signal for 64h µs expression set at 100
		* 2 biological replicates; 1 technical

## Sheet: 2J
	Figure 2J - Source data cell growth assay quantitations
		cell type	Mif	cell growth (%)	s.e.m.	n	significance
		HeLa-MifON	-	100		2	ns
			+	104.3	3.87	2	ns
		HeLa-µs	-	110.5	1.22	2	ns
			+	78.8	8.83	2	ns
	Note:	Statistical significance compared to untreated HeLa-MifON cells (GraphPad Prism software): ns not significant
