# Supplementary material for: Ratiometric sensing of BiP-client versus BiP levels by the unfolded protein response determines its signaling amplitude
Source: eLife journal article supplement (doi:10.7554/elife.27518), 2017-12-18
Supplement: supp [file elife-27518-supp-v1.zip › elife_poa_e27518_Figure_3_source_data_1.xlsx]

## Sheet: 3D
	Figure 3D - Source data BiP level quantitations
		Mif	cell line	BiP (fold Increase)	s.e.m.	n	significance
		-	HeLa-µs	1	0.323701	3
		+	HeLa-µs	2.08827	0.248886	3	*
		+	HeLa-µs>l	1.35251	0.147976	3	ns
		+	HeLa-µs=l	1.0936	0.111978	3	ns
		+	HeLa-µs<l	1.12236	0.0432072	3	ns
		+	HeLa-l	0.994106	0.0012893	2	ns
	Note:	statistical significance of differences in BiP levels compared to average in untreated HeLa-µs (GraphPad Prism software): *p≤0,05 - ns not significant
