# Supplementary material for: Ratiometric sensing of BiP-client versus BiP levels by the unfolded protein response determines its signaling amplitude
Source: eLife journal article supplement (doi:10.7554/elife.27518), 2017-12-18
Supplement: supp [file elife-27518-supp-v1.zip › elife_poa_e27518_Figure_4_source_data_1.xlsx]

## Sheet: 4B
	Figure 4B - Source data µs level and BiP level quantitations
		time (hrs)	BiP level	s.e.m.	n	µs level	s.e.m.	n	significance	[BiP] > [µs] or [µs] > [BiP]
		0	1	0.1598	5	0	0	5	***	[BiP] > [µs]
		2	1.19042	0.115683	5	0.852234	0.184126	5	ns
		4	1.40561	0.152542	5	1.74746	0.317612	5	ns
		5	1.58529	0.147354	5	2.37239	0.391831	5	ns
		6	1.79299	0.166278	5	2.90457	0.484958	5	ns
		8	2.27267	0.237104	5	3.82474	0.802388	5	*	[µs] > [BiP]
		9	2.72479	0.241584	5	4.26557	0.863102	5	*	[µs] > [BiP]
		10	3.17378	0.273426	5	4.66806	0.876614	5	*	[µs] > [BiP]
		12	3.94466	0.283828	5	5.52799	0.885841	5	*	[µs] > [BiP]
		16	5.27384	0.636827	5	6.74854	1.13643	5	ns
		25	8.77607	0.550906	5	9.11857	1.47993	5	ns
		32	11.1292	1.01911	5	10.9904	1.84571	5	ns
		48	12.2442	0.528744	5	10.8371	1.50661	5	ns
		60	12.4866	0.144866	5	10.902	1.34834	5	***	[BiP] > [µs]
		64	12.5014	na	5	11.0409	1.27409	5	***	[BiP] > [µs]
	Notes:	Both BiP and µs levels are expressed in equivalents of BiP levels at t=0
		na not applicable
		statistical significance of [BiP] compared to [µs] (GraphPad Prism software): ***p≤0,001 - *p≤0,05 -ns not significant

## Sheet: 4D
	Figure 4D - Source data UPR activation quantitations
			IRE1α: XBP1 mRNA splicing (% of max)			PERK: CHOP levels (% of max)			ATF6α: p50-ATF6α levels (% of max)
		time (hrs)	average	s.e.m.	n	average	s.e.m.	n	average	s.e.m.	n
		0	0.983038	0.547365	22	0	1.60061	7	0	0	3
		2	18.4256	9.96774	10	0	0	4	3.83842	3.83842	3
		4	54.2803	7.67405	9	1.96416	1.96416	4	18.2841	3.44985	3
		6	95.5121	9.38731	3	6.45004	2.41187	3	100	37.9917	3
		8	90.31	5.25057	11	31.7451	9.83378	4	56.7266	28.5547	3
		12	100	6.18666	3	54.5391	23.7959	3	54.802	18.2883	3
		16	83.9639	3.83582	18	100	17.1866	10	53.8303	27.7542	3
		24	75.5199	5.94783	4	26.6176	22.1609	2	na	na	0
		32	88.6684	5.18352	10	44.4874	15.3244	4	50.0563	19.5491	3
		48	54.5649	6.67803	6	19.3867	5.46642	2	26.9316	20.3675	2
		64	48.1393	4.00321	13	11.4672	4.1428	4	17.2282	0.759553	2
		128	45.2682	6.43956	6	11.2676	0.6852	2	9.48696	na	1
	Notes:	na = not applicable
		plots of quantitations for each UPR branch individually are shown in Figure 4—figure supplements 1-3
