# Supplementary material for: Ratiometric sensing of BiP-client versus BiP levels by the unfolded protein response determines its signaling amplitude
Source: eLife journal article supplement (doi:10.7554/elife.27518), 2017-12-18
Supplement: supp [file elife-27518-supp-v1.zip › elife_poa_e27518_Figure_5_source_data_1.xlsx]

## Sheet: 5
	Figure 5 - Source data ER area (as a percentage of cytosolic area) quantitations
		time (days)	ER area (%)	s.e.m.	n	significance
		0	11.85	0.798952	10
		1	13.2827	0.843843	10	ns
		3	17.7313	1.39152	10	***
		7	15.8086	0.935744	10	*
	Note:	statistical significance of differences in ER area compared to average ER area in HeLa-µs at day 0 (GraphPad Prism software): *p≤0,05 - ns not significant
