# Supplementary material for: Ratiometric sensing of BiP-client versus BiP levels by the unfolded protein response determines its signaling amplitude
Source: eLife journal article supplement (doi:10.7554/elife.27518), 2017-12-18
Supplement: supp [file elife-27518-supp-v1.zip › elife_poa_e27518_Figure_6_source_data_1.xlsx]

## Sheet: day 0 total proteome
	Figure 6 - Source data day 0 total proteome; data derived from supplementary file 1, sheet D
			day 0 (AVG) (ppm)
		cytosol	744350
		nucleus	71757.9
		mitochondria	71069.1
		other organelles	12081
		ER	28748.8
		IgM	1.71762
		not assessed	71991.1
		TOTAL:	1000000

## Sheet: day 1 total proteome
	Figure 6 - Source data day 1 total proteome; data derived from supplementary file 1, sheet D
			day 1 (AVG) (ppm)
		cytosol	724807
		nucleus	74526.1
		mitochondria	65345.5
		other organelles	11824.1
		ER	45596.4
		IgM	11279.5
		not assessed	66621.2
		TOTAL:	1000000

## Sheet: day 3 total proteome
	Figure 6 - Source data day 3 total proteome; data derived from supplementary file 1, sheet D
			day 3 (AVG) (ppm)
		cytosol	655541
		nucleus	77051.1
		mitochondria	63567.8
		other organelles	14204.6
		ER	89220.5
		IgM	17362
		not assessed	83053.3
		TOTAL:	1000000

## Sheet: day 7 total proteome
	Figure 6 - Source data day 7 total proteome; data derived from supplementary file 1, sheet D
			day 7 (AVG) (ppm)
		cytosol	671547
		nucleus	64875.5
		mitochondria	55102.6
		other organelles	12301.7
		ER	101042
		IgM	23355.8
		not assessed	71775.3
		TOTAL:	1000000

## Sheet: day 0 ER proteome
	Figure 6 - Source data day 0 ER proteome; data derived from supplementary file 1, sheet E
				day 0 (ppm)
		PDI family	ERp57	4597.66
			PDI	4452.8
			P5	1075.54
			ERp46	722.147
			ERp72	680.763
			ERp29	499.703
			AGR2	242.358
			ERp44	98.5319
		GRPs & co-chaperones	BiP	4567.01
			GRP170	284.129
			GRP94	2035.46
			CNPY2	230.225
		calcium storage	calumenin	895.953
			reticulocalbin 1	352.021
			reticulocalbin 3	114.417
		glycoprotein folding	CRT	2500.78
			CNX	164.422
			UGGT1	94.5454
			glucosidase II a	880.271
			glucosidase II b	1096.65
			OST	118.909
		other ER chaperones	HSP47	975.438
			Armet/MANF	76.8592
		PPIases	cyclophilin B	681.187
			FKBP10	619.662
		redox control	peroxiredoxin-4	308.909
			ERO1a	163.422
		ER shape	RTN4	57.624
		translocon	TRAPd	161.409
			IgM mu HC	1.71762
			TOTAL:	28750.5

## Sheet: day 1 ER proteome
	Figure 6 - Source data day 1 ER proteome; data derived from supplementary file 1, sheet E
				day 1 (ppm)
		PDI family	ERp57	3862.67
			PDI	4767.79
			P5	1475.2
			ERp46	429.07
			ERp72	1653.27
			ERp29	454.24
			AGR2	489.309
			ERp44	101.888
		GRPs & co-chaperones	BiP	16124.6
			GRP170	2058.99
			GRP94	4174.33
			CNPY2	326.633
		calcium storage	calumenin	638.129
			reticulocalbin 1	175.122
			reticulocalbin 3	146.856
		glycoprotein folding	CRT	3216.6
			CNX	357.618
			UGGT1	27.7242
			glucosidase II a	859.96
			glucosidase II b	721.558
			OST	110.56
		other ER chaperones	HSP47	498.22
			Armet/MANF	198.382
		PPIases	cyclophilin B	1336.97
			FKBP10	335.984
		redox control	peroxiredoxin-4	462.31
			ERO1a	186.503
		ER shape	RTN4	75.0196
		translocon	TRAPd	330.425
			IgM mu HC	11279.4
			TOTAL:	56875.3

## Sheet: day 3 ER proteome
	Figure 6 - Source data day 3 ER proteome; data derived from supplementary file 1, sheet E
				day 3 (ppm)
		PDI family	ERp57	8039.6
			PDI	6015.24
			P5	3982.97
			ERp46	462.723
			ERp72	4219.54
			ERp29	657.796
			AGR2	1134.55
			ERp44	308.346
		GRPs & co-chaperones	BiP	33934.1
			GRP170	3752.94
			GRP94	9260.71
			CNPY2	301.174
		calcium storage	calumenin	1052.51
			reticulocalbin 1	659.151
			reticulocalbin 3	254.113
		glycoprotein folding	CRT	7428.39
			CNX	378.635
			UGGT1	255.737
			glucosidase II a	1387.89
			glucosidase II b	1200.81
			OST	177.295
		other ER chaperones	HSP47	832.816
			Armet/MANF	661.709
		PPIases	cyclophilin B	1462.97
			FKBP10	347.892
		redox control	peroxiredoxin-4	510.434
			ERO1a	236.611
		ER shape	RTN4	94.4686
		translocon	TRAPd	209.346
			IgM mu HC	17362
			TOTAL:	106582

## Sheet: day 7 ER proteome
	Figure 6 - Source data day 7 ER proteome; data derived from supplementary file 1, sheet E
				day 7 (ppm)
		PDI family	ERp57	9136.57
			PDI	7073.74
			P5	5202.27
			ERp46	598.372
			ERp72	4522.75
			ERp29	604.9
			AGR2	1070.97
			ERp44	262.695
		GRPs & co-chaperones	BiP	38407.7
			GRP170	4538.83
			GRP94	10022
			CNPY2	248.067
		calcium storage	calumenin	1368.13
			reticulocalbin 1	711.512
			reticulocalbin 3	270.004
		glycoprotein folding	CRT	8496.18
			CNX	398.315
			UGGT1	287.486
			glucosidase II a	1476.94
			glucosidase II b	1446.21
			OST	256.677
		other ER chaperones	HSP47	991.778
			Armet/MANF	658.511
		PPIases	cyclophilin B	1300.37
			FKBP10	375.645
		redox control	peroxiredoxin-4	453.024
			ERO1a	412.582
		ER shape	RTN4	243.579
		translocon	TRAPd	206.475
			IgM mu HC	23355.8
			TOTAL:	124398
