# Supplementary material for: Ratiometric sensing of BiP-client versus BiP levels by the unfolded protein response determines its signaling amplitude
Source: eLife journal article supplement (doi:10.7554/elife.27518), 2017-12-18
Supplement: supp [file elife-27518-supp-v1.zip › elife_poa_e27518_Figure_7_source_data_1.xlsx]

## Sheet: 7B
	Figure 7B - Source data cell growth assay quantitations
		Mif	genotype	cell growth (%)	s.e.m.	n	significance(1)	significance(2)
		-	WT	100	na	3
		-	IRE1α KO / PERK KD / ATF6α KD	73.1545	17.1972	2	ns
		+	WT	79.3117	7.37612	3
		+	IRE1α KO / PERK KD / ATF6α KD	6.25	3.99137	2		***
	Notes:	(1) statistical significance in comparison to WT not expressing µs (GraphPad Prism software): ns not significant
		(2) statistical significance in comparison to WT expressing µs (GraphPad Prism software): *** p≤0,001

## Sheet: 7C
	Figure 7C - Source data Annexin V assay quantitations
		Mif	genotype	Annexin V positive (%)	s.e.m.	n	significance
		-	WT	2.95	0.75	2
		+		3.64	0.2	2	ns
		-	IRE1α KO / PERK KD / ATF6α KD	5.04	0.98	2	ns
		+		46.06	6.05	2	**
	Note:	statistical significance compared to untreated WT (GraphPad Prism software): **p≤0,01 - ns not significant
