# Supplementary material for: Ratiometric sensing of BiP-client versus BiP levels by the unfolded protein response determines its signaling amplitude
Source: eLife journal article supplement (doi:10.7554/elife.27518), 2017-12-18
Supplement: supp [file elife-27518-supp-v1.zip › elife_poa_e27518_Supplementary_File_1.xlsx]

## Sheet: Legend
	Supplementary file 1 (6 sheets including this one)
	Legend: HeLa-µs cells were induced with 0.5 nM Mif to express µs for various days as indicated. Proteins in total lysates at each time point were identified by mass spectrometry. The lists of identified proteins were filtered to eliminate reverse hits and known contaminants. Normalized H/L ratios were analyzed via Perseus (version 1.5.0.6). Statistical analysis was performed using the Significanc…

## Sheet: A) prot identities (ppm) +SILAC
	Gene names	Protein names	top 500 (0)	top 500 (1)	top 500 (3)	top 500 (7)	top 500 (all)	value at day 0 if YES = 0 if NO = 1	value at day 1 if YES = 0 if NO = 1	value at day 3 if YES = 0 if NO = 1	value at day 7 if YES = 0 if NO = 1	Values at all days?	LFQ H0_L0 (ppm)	LFQ H0_L0_bis (ppm)	LFQ day 0 (AVG) (ppm)	LFQ H0_L1 (ppm)	LFQ H0_L1_bis (ppm)	LFQ day 1 (AVG) (ppm)	LFQ H0_L3 (ppm)	LFQ H0_L3_bis (ppm)	LFQ day 3 (AVG) (ppm)	LFQ H0_L7 (ppm)	LFQ H0_L7_bis (ppm)	LFQ day 7 (AVG) (ppm)	LFQ AVG total (ppm)		Q-value	Score	Intensity	Intensity L	Intensity H	Intensity H0_L0	Intensity H0_L1	Intensity H0_L3	Intensity H0_L7	Ratio H/L normalized H0_L0 Significance B	Ratio H/L normalized H0_L1 Significance B	Ratio H/L normalized H0_L3 Significance B	Ratio H/L normalized H0_L7 Significance B	Ratio H/L normalized H0_L0	Ratio H/L normalized H0_L1	Ratio H/L normalized H0_L3	Ratio H/L normalized H0_L7	day0/day0 (SILAC)	day1/day0 (SILAC)	day3/day0 (SILAC)	day7/day0 (SILAC)	Ratio H/L normalized H0_L0 B significant	Ratio H/L normalized H0_L1 B significant
	ACTB; ACTG1	Actin, cytoplasmic 1;Actin, cytoplasmic 1, N-terminally processed; Actin, cytoplasmic 2;Actin, cytoplasmic 2, N-terminally processed	1	1	1	1	4	0	0	0	0	YES	51393.5	48697.4	50045.4	43041.7	44292.2	43667	36780	48987.3	42883.7	49535.3	58911.9	54223.6	47704.9		0	323.31	1386400000000	684510000000	701870000000	11.374	11.347	11.4069	11.4611	0.628731	0.500144	0.759845	0.439076	-0.0888684	-0.132293	-0.082194	-0.234907	1.06354	1.09603	1.05863	1.17683
	KRT18	Keratin, type I cytoskeletal 18	1	1	1	1	4	0	0	0	0	YES	45860.6	44580.8	45220.7	34359.6	34889.2	34624.4	30124.9	29879.5	30002.2	28806.7	29734.3	29270.5	34779.4		0	323.31	1045800000000	570430000000	475380000000	11.297	11.2435	11.2484	11.1893	0.00121025	0.0361806	0.543649	0.33421	-0.540044	-0.394354	-0.158204	-0.292705	1.45402	1.31435	1.1159	1.22493	+	+
	GAPDH	Glyceraldehyde-3-phosphate dehydrogenase	1	1	1	1	4	0	0	0	0	YES	35210.5	32121	33665.8	28314.7	29715.4	29015	19131.4	19790.9	19461.2	22592.9	22080.1	22336.5	26119.6		0	323.31	849320000000	402080000000	447230000000	11.2035	11.1853	11.1372	11.188	0.321991	0.393343	0.374771	0.18175	-0.171937	-0.16537	0.201885	0.401958	1.12657	1.12145	0.869414	0.75683
	HSPA5	78 kDa glucose-regulated protein	1	1	1	1	4	0	0	0	0	YES	4581.28	4552.73	4567.01	16832.1	15417.4	16124.8	32912.4	34955.9	33934.1	39236.9	37578.4	38407.7	23258.4		0	323.31	453990000000	336440000000	117550000000	10.3303	10.7411	10.9905	11.0409	0.384132	5.12384e-47	1.09682e-44	1.3358e-37	-0.15226	-2.66438	-3.53954	-3.86162	1.11131	6.33955	11.628	14.5366		+
	EEF1A1;EEF1A1P5	Elongation factor 1-alpha 1;Putative elongation factor 1-alpha-like 3	1	1	1	1	4	0	0	0	0	YES	16338.1	17438.7	16888.4	16704.7	18990.1	17847.4	18564.2	19868.8	19216.5	16072.7	16382.1	16227.4	17544.9		0	323.31	527140000000	269010000000	258130000000	10.9112	10.9748	11.0224	10.9432	0.946737	0.265763	0.305383	0.582716	-0.0205745	-0.213203	-0.263456	-0.167345	1.01436	1.15926	1.20035	1.12299
	EEF2	Elongation factor 2	1	1	1	1	4	0	0	0	0	YES	18700.5	17941.9	18321.2	18129.2	16713.6	17421.4	15339.2	15918.4	15628.8	15122.3	16028.9	15575.6	16736.7		0	323.31	513550000000	271680000000	241870000000	10.9271	10.925	10.9325	10.919	0.101554	0.0463313	0.314832	0.485196	-0.277971	-0.375441	-0.25846	-0.212083	1.21249	1.29724	1.1962	1.15836		+
	PKM	Pyruvate kinase PKM;Pyruvate kinase	1	1	1	1	4	0	0	0	0	YES	16596.6	13014.5	14805.5	12783.5	12276.6	12530.1	14746.8	13858	14302.4	19305.8	16889	18097.4	14933.9		0	323.31	451520000000	219480000000	232050000000	10.8485	10.8319	10.9522	11.0011	0.317311	0.70853	0.925062	0.405439	-0.173514	0.059909	0.0167816	-0.252432	1.1278	0.959325	0.988435	1.19121
	TUBA1C	Tubulin alpha-1C chain	1	1	1	1	4	0	0	0	0	YES	15269.1	17033.1	16151.1	12861.8	13036.2	12949	12268.1	13187.4	12727.8	12577.2	13063.1	12820.1	13662		0	323.31	427570000000	209130000000	218440000000	10.9262	10.8949	10.8825	10.8554	0.785722	0.887613	0.906756	0.921519	0.0409626	-0.0339831	-0.0346775	-0.0315479	0.972006	1.02383	1.02433	1.02211
	AKR1B1	Aldose reductase	1	1	1	1	4	0	0	0	0	YES	19070.6	19850.8	19460.7	5974.62	6091.83	6033.23	10527.6	10491.3	10509.4	18381.9	18694.6	18538.3	13635.4		0	323.31	343990000000	201950000000	142040000000	10.8596	10.6605	10.725	10.8349	6.16056e-12	2.09262e-05	0.0393435	1.34991e-07	-1.13651	0.764006	-0.524438	-1.58962	2.19848	0.588859	1.43837	3.00969	+	+
	ANXA2;ANXA2P2	Annexin A2;Annexin;Putative annexin A2-like protein	1	1	1	1	4	0	0	0	0	YES	14016.2	13124.6	13570.4	12958.5	11255.3	12106.9	11986.9	10445	11216	15980.3	15429.4	15704.8	13149.5		0	323.31	383160000000	199660000000	183500000000	10.7941	10.8193	10.8142	10.8685	0.190097	0.39964	0.498955	0.032596	-0.224368	-0.163284	-0.17555	-0.64548	1.16827	1.11983	1.12939	1.56426
	LDHA	L-lactate dehydrogenase A chain	1	1	1	1	4	0	0	0	0	YES	13409.7	17178.9	15294.3	18081.6	13798.6	15940.1	11538.8	10465.3	11002.1	8968.83	9274.43	9121.63	12839.5		0	323.31	469710000000	206670000000	263040000000	10.8979	11.0077	10.9477	10.8402	0.751557	0.363604	0.00840756	0.042228	-0.061511	0.156914	0.609566	0.6124	1.04356	0.896941	0.655394	0.654108
	TUBB4B	Tubulin beta-4B chain	1	1	1	1	4	0	0	0	0	YES	11414.2	13769.7	12592	13029.1	15248.1	14138.6	10914.1	9938.46	10426.3	13886.6	12203	13044.8	12550.4		0	323.31	391830000000	188600000000	203230000000	10.8008	10.8733	10.8085	10.8668	0.907798	0.759672	0.854277	0.938991	0.0119249	-0.0643441	-0.051444	-0.0249275	0.991768	1.04561	1.0363	1.01743
	HSP90AB1	Heat shock protein HSP 90-beta	1	1	1	1	4	0	0	0	0	YES	13290.3	13620.1	13455.2	11523.3	10529.5	11026.4	11948.8	12727.1	12338	10194.3	10860.7	10527.5	11836.8		0	323.31	422500000000	188970000000	233540000000	10.8836	10.8394	10.9038	10.8587	0.300073	0.273988	0.374771	0.121638	0.183201	0.190552	0.201885	0.466236	0.880747	0.876271	0.869414	0.723851
	TKT	Transketolase	1	1	1	1	4	0	0	0	0	YES	10943.8	11388.6	11166.2	14948.6	14385.9	14667.3	13442.2	10997.9	12220.1	9560.43	8204.52	8882.47	11734		0	323.31	400670000000	190750000000	209920000000	10.7446	10.9089	10.9036	10.7854	0.656488	0.68999	0.550921	0.261384	0.0731348	-0.0814917	0.133958	0.337768	0.95057	1.05811	0.911328	0.791264
	ENO1	Alpha-enolase	1	1	1	1	4	0	0	0	0	YES	12117.1	12502.1	12309.6	11066.6	10512.7	10789.6	11744.6	11302.3	11523.5	12352.3	10928	11640.2	11565.7		0	323.31	392170000000	169870000000	222300000000	10.8261	10.8152	10.9068	10.8857	0.680683	0.16451	0.291576	0.657077	0.0669503	0.244278	0.240864	0.132379	0.954654	0.844238	0.846238	0.912326
	CPS1	Carbamoyl-phosphate synthase [ammonia], mitochondrial	1	1	1	1	4	0	0	0	0	YES	11435.7	12258.1	11846.9	11785	11676.2	11730.6	11531.5	11263.4	11397.5	6965.46	7159.55	7062.5	10509.4		0	323.31	377030000000	174840000000	202190000000	10.7806	10.8452	10.8332	10.7224	0.73938	0.355385	0.887506	0.0394091	0.0522768	0.159758	-0.0408086	0.621055	0.964413	0.895175	1.02869	0.650195
	ALDOA	Fructose-bisphosphate aldolase A	1	1	1	1	4	0	0	0	0	YES	12148.9	11869.8	12009.4	13075.2	9628.48	11351.8	9178.39	9707.9	9443.14	7570.06	7934.47	7752.27	10139.1		0	323.31	361800000000	172180000000	189630000000	10.7688	10.8173	10.7896	10.7314	0.604828	0.850403	0.319617	0.167603	-0.0944334	0.0263043	0.227002	0.415434	1.06765	0.981932	0.854409	0.749794
	TPI1	Triosephosphate isomerase	1	1	1	1	4	0	0	0	0	YES	11326.7	11387.9	11357.3	8872.33	8582.27	8727.3	7625.03	9045.44	8335.23	8100.62	10941.5	9521.05	9485.21		0	309.32	275540000000	135790000000	139750000000	10.7547	10.6632	10.6857	10.7138	0.597268	0.421902	0.675504	0.659653	0.0886844	-0.156064	-0.110651	-0.134509	0.94038	1.11424	1.07972	1.09772
	HSPA8	Heat shock cognate 71 kDa protein	1	1	1	1	4	0	0	0	0	YES	10144.6	9281.02	9712.83	10025.1	9308.09	9666.6	8539.87	8695.54	8617.7	9003.31	8223.53	8613.42	9152.64		0	323.31	331380000000	155100000000	176280000000	10.7073	10.7587	10.7368	10.7174	0.762114	0.447126	0.634273	0.687048	0.0467006	0.130008	0.105812	0.119954	0.968148	0.913826	0.929282	0.920217
	GPI	Glucose-6-phosphate isomerase	1	1	1	1	4	0	0	0	0	YES	10787.8	10107.4	10447.6	11994.5	9339.61	10667.1	8767.56	7991.2	8379.38	6317.67	7123.04	6720.36	9053.61		0	323.31	291710000000	142580000000	149130000000	10.6923	10.7947	10.725	10.641	0.658323	0.485526	0.637964	0.260424	-0.0821024	-0.136569	0.104605	0.338453	1.05856	1.09929	0.93006	0.790889
	VIM	Vimentin	1	1	1	1	4	0	0	0	0	YES	9841.37	9163.93	9502.65	6564.07	6080.61	6322.34	7337.37	8096.73	7717.05	10612	10762.5	10687.2	8557.32		0	323.31	266430000000	130220000000	136210000000	10.6558	10.5805	10.6968	10.7414	0.83747	0.507347	0.568791	0.308255	-0.0432445	0.112366	0.127765	-0.308734	1.03043	0.925069	0.915248	1.23862
	PGK1	Phosphoglycerate kinase 1	1	1	1	1	4	0	0	0	0	YES	10505.2	10285.7	10395.5	6859.25	8505.29	7682.27	6862.52	7991.6	7427.06	7262.98	9113.67	8188.32	8423.28		0	323.31	256850000000	123350000000	133500000000	10.7136	10.6623	10.6801	10.6657	0.955038	0.77864	0.730067	0.896832	0.000865329	-0.0597655	0.0753272	-0.0409273	0.9994	1.0423	0.949127	1.02877
	PRDX1	Peroxiredoxin-1	1	1	1	1	4	0	0	0	0	YES	9011.97	8554.31	8783.14	9203.89	7780.93	8492.41	7793.81	8154.05	7973.93	7288.21	7762.14	7525.18	8193.67		0	210.48	274850000000	127510000000	147340000000	10.6669	10.6595	10.6983	10.6551	0.361936	0.830289	0.975965	0.700036	0.160017	0.0309717	-0.0127519	0.114634	0.895015	0.978761	1.00888	0.923617
	PFN1	Profilin-1	1	1	1	1	4	0	0	0	0	YES	7295.46	8098.8	7697.13	8798.65	9047.82	8923.23	7112.99	6777.83	6945.41	7771.21	6799.22	7285.21	7712.75		0	274.28	249620000000	122720000000	126900000000	10.5796	10.6671	10.6153	10.5977	0.90536	0.803393	0.931381	0.72745	0.0124972	-0.0538381	0.0149266	-0.10684	0.991375	1.03802	0.989707	1.07687
	YWHAE	14-3-3 protein epsilon	1	1	1	1	4	0	0	0	0	YES	4422.89	5610.39	5016.64	5559.02	6375.19	5967.11	7793.65	9054.37	8424.01	8116.3	8479.32	8297.81	6926.39		0	188.02	222280000000	100950000000	121330000000	10.4228	10.5117	10.7177	10.6875	0.213574	0.582068	0.701232	0.628814	0.221815	0.0919367	0.0843364	0.144308	0.857486	0.938262	0.943218	0.904814
	HSP90AA1	Heat shock protein HSP 90-alpha	1	1	1	1	4	0	0	0	0	YES	5099.06	6438.93	5768.99	7803.2	7786.07	7794.63	6871.11	6651.67	6761.39	5361.47	5782.76	5572.12	6474.28		0	323.31	220880000000	104010000000	116870000000	10.5037	10.6309	10.6121	10.5471	0.119888	0.724835	0.95802	0.464719	0.279768	-0.0728469	-0.018425	0.219215	0.823723	1.05179	1.01285	0.859033
	PDIA3	Protein disulfide-isomerase A3 = ERp57	1	1	1	1	4	0	0	0	0	YES	4618.79	4576.52	4597.66	4076.89	3648.53	3862.71	7804.45	8274.74	8039.6	9072.61	9200.53	9136.57	6409.13		0	12.869	5488800000	3225100000	2263800000	8.48688	8.80141	9.04587	9.0769	0.908016	0.126045	4.93359e-05	4.52527e-05	0.0149266	-0.341427	-1.3478	-1.61485	0.989707	1.26701	2.54524	3.06279
	HSP90B1	Endoplasmin = GRP94	1	1	1	1	4	0	0	0	0	YES	1986.58	2084.34	2035.46	4509.15	3839.59	4174.37	9372.87	9148.54	9260.71	10680.9	9363.13	10022	6373.14		0	323.31	154680000000	101170000000	53508000000	10.0023	10.265	10.4811	10.5084	0.775896	4.2439e-07	4.22526e-19	1.12137e-16	0.0433446	-0.940894	-2.25581	-2.49891	0.970403	1.91972	4.77601	5.65259		+
	ACTN4	Alpha-actinin-4	1	1	1	1	4	0	0	0	0	YES	6043.08	6860.67	6451.88	6866.08	5244.23	6055.15	6355.27	6332.13	6343.7	6469.37	6504.22	6486.8	6334.38		0	323.31	219180000000	103260000000	115920000000	10.5122	10.5779	10.6159	10.5799	0.844501	0.525447	0.519146	0.80445	0.0268709	0.107286	0.145221	0.0729976	0.981547	0.928333	0.904241	0.950661
	FLNA	Filamin-A	1	1	1	1	4	0	0	0	0	YES	5610	5990.89	5800.44	6551.32	6388.61	6469.97	5135.43	5038.4	5086.91	5776.06	6073.32	5924.69	5820.5		0	323.31	202630000000	99736000000	102900000000	10.4584	10.5817	10.5286	10.5424	0.811648	0.528824	0.36361	0.91763	-0.0486808	0.106348	0.206768	-0.0330232	1.03432	0.928936	0.866476	1.02315
	FASN	Fatty acid synthase;[Acyl-carrier-protein] S-acetyltransferase;[Acyl-carrier-protein] S-malonyltransferase;3-oxoacyl-[acyl-carrier-protein] synthase;3-oxoacyl-[acyl-carrier-protein] reductase;3-hydroxyacyl-[acyl-carrier-protein] dehydratase;Enoyl-[acyl-carrier-protein] reductase;Oleoyl-[acyl-carrier-protein] hydrolase	1	1	1	1	4	0	0	0	0	YES	6023.9	6119.31	6071.61	7998.91	8547.08	8272.99	5602.08	4927.5	5264.79	3371.66	3144.41	3258.03	5716.86		0	323.31	234700000000	102370000000	132330000000	10.5094	10.665	10.6247	10.5284	0.272426	0.726228	0.00709953	6.86949e-05	0.194591	0.0556121	0.622837	1.20195	0.87382	0.962186	0.649393	0.434688
	P4HB	Protein disulfide-isomerase = PDI	1	1	1	1	4	0	0	0	0	YES	4541.65	4363.95	4452.8	4665.57	4870.1	4767.84	5011.12	7019.35	6015.24	7034.88	7112.59	7073.74	5577.4		0	323.31	161370000000	91554000000	69818000000	10.2931	10.3935	10.4272	10.4692	0.164641	0.163507	0.000135484	0.000142497	-0.237371	-0.264946	-0.966884	-1.14746	1.17884	1.20159	1.95461	2.21523
	ATP5B	ATP synthase subunit beta, mitochondrial;ATP synthase subunit beta	1	1	1	1	4	0	0	0	0	YES	6217.72	5068.45	5643.09	6290.76	6228.85	6259.81	5015.1	5971.52	5493.31	4418.59	4862.29	4640.44	5509.16		0	323.31	194310000000	99132000000	95183000000	10.4757	10.5186	10.5379	10.4688	0.321506	0.70589	0.458399	0.85344	-0.1721	-0.0775281	-0.192019	-0.0575118	1.1267	1.05521	1.14236	1.04067
	CALR	Calreticulin	1	1	1	1	4	0	0	0	0	YES	2037.76	2963.79	2500.78	3546.48	2886.78	3216.63	7086.82	7769.97	7428.39	7895.33	9097.04	8496.18	5410.5		0	323.31	134570000000	84166000000	50408000000	10.1381	10.2005	10.4519	10.4575	0.235056	9.96592e-05	3.65703e-11	2.59246e-11	-0.204233	-0.725756	-1.67277	-2.01008	1.15207	1.65377	3.18827	4.02803		+
	HSPA9	Stress-70 protein, mitochondrial	1	1	1	1	4	0	0	0	0	YES	5060.7	5135.69	5098.19	4270.54	5208.16	4739.35	5976.12	6040.69	6008.4	5394.38	5505.03	5449.7	5323.91		0	323.31	176950000000	89614000000	87333000000	10.3925	10.4783	10.5186	10.4634	0.987049	0.824833	0.180734	0.403927	-0.0122862	0.032242	-0.34247	-0.25324	1.00855	0.977899	1.26793	1.19188
	PPIA	Peptidyl-prolyl cis-trans isomerase A;Peptidyl-prolyl cis-trans isomerase A, N-terminally processed;Peptidyl-prolyl cis-trans isomerase	1	1	1	1	4	0	0	0	0	YES	6329.15	6002.98	6166.07	5204.43	5982.07	5593.25	4369.6	4563.72	4466.66	4256.94	4186.68	4221.81	5111.95		0	210.42	190600000000	84681000000	105920000000	10.5207	10.5688	10.5013	10.4666	0.352884	0.436784	0.267266	0.20871	0.163241	0.133169	0.253626	0.37829	0.893017	0.911826	0.838785	0.769349
	ATP5A1	ATP synthase subunit alpha, mitochondrial	1	1	1	1	4	0	0	0	0	YES	9725.96	5071.78	7398.87	4267.77	5264.54	4766.16	3802.14	3970.76	3886.45	4302.39	4075.02	4188.7	5060.04		0	323.31	149590000000	75123000000	74468000000	10.3711	10.4744	10.3614	10.3957	0.303322	0.872815	0.889321	0.717125	-0.178322	-0.0374435	-0.0402298	0.107688	1.13157	1.02629	1.02828	0.928074
	PRDX2	Peroxiredoxin-2	1	1	1	1	4	0	0	0	0	YES	5861.44	5350	5605.72	4420.12	4507.41	4463.77	4991.6	5004.38	4997.99	4346.97	5030.49	4688.73	4939.05		0	167.49	173710000000	82665000000	91048000000	10.4427	10.4499	10.4809	10.4732	0.785229	0.894838	0.930339	0.619056	-0.0542875	0.0160683	-0.0271898	0.148479	1.03835	0.988924	1.01903	0.902201
	YWHAZ	14-3-3 protein zeta/delta	1	1	1	1	4	0	0	0	0	YES	4233.29	3666.4	3949.85	5082.79	5702.01	5392.4	4412.14	4973.13	4692.63	5402.69	5188.65	5295.67	4832.64		0	295.2	160670000000	77178000000	83492000000	10.3266	10.4669	10.4649	10.4697	0.317311	0.79141	0.882641	0.623214	0.176451	-0.0567013	0.0292761	-0.149841	0.884877	1.04008	0.979912	1.10945
	S100A11	Protein S100-A11;Protein S100-A11, N-terminally processed	1	1	1	1	4	0	0	0	0	YES	3659.07	5153.36	4406.22	6516.86	6332.67	6424.77	3923.77	4081.25	4002.51	5436.38	3139.73	4288.06	4780.39		0	125.04	160490000000	78068000000	82422000000	10.4446	10.5669	10.3906	10.4531	0.686884	0.443229	0.698208	0.502628	-0.0756873	0.131194	0.0852886	-0.203768	1.05386	0.913075	0.942596	1.1517
	LDHB	L-lactate dehydrogenase B chain;L-lactate dehydrogenase	1	1	1	1	4	0	0	0	0	YES	4550.32	5507.8	5029.06	6469.59	6518.74	6494.16	3424.13	3653.25	3538.69	2986.84	3286.16	3136.5	4549.6		0	172.76	166280000000	75214000000	91070000000	10.4256	10.5904	10.397	10.3153	0.341185	0.339348	0.136578	0.165086	0.167486	0.16543	0.3421	0.41792	0.890393	0.891663	0.788892	0.748503
	CFL1	Cofilin-1	1	1	1	1	4	0	0	0	0	YES	5140.21	5289.34	5214.78	3452.15	3968.11	3710.13	4448.36	4633.05	4540.71	4265.33	5184.21	4724.77	4547.59		0	175.35	147800000000	70417000000	77384000000	10.412	10.3302	10.4457	10.4248	0.86724	0.847344	0.895181	0.806589	0.0214797	0.0270125	-0.0383618	-0.0756113	0.985222	0.981451	1.02695	1.05381
	HSPD1	60 kDa heat shock protein, mitochondrial	1	1	1	1	4	0	0	0	0	YES	4699.72	4186.51	4443.12	4467.25	3684.01	4075.63	5215.49	5055.28	5135.38	3974.62	4695.11	4334.86	4497.25		0	323.31	150830000000	72793000000	78033000000	10.356	10.4597	10.4703	10.4033	0.703111	0.829075	0.53891	0.882227	0.0612924	0.0312541	-0.160008	0.0429245	0.958405	0.978569	1.11729	0.970685
	CLTC	Clathrin heavy chain 1	1	1	1	1	4	0	0	0	0	YES	4592.03	3524.01	4058.02	4108.13	4087.24	4097.69	4878.56	4592.21	4735.39	4996.17	4625.42	4810.79	4425.47		0	323.31	148420000000	74643000000	73776000000	10.3445	10.3781	10.4438	10.4084	0.572033	0.67843	0.814787	0.501925	-0.102233	-0.0843949	-0.0641933	-0.2041	1.07343	1.06024	1.0455	1.15197
	UBA1	Ubiquitin-like modifier-activating enzyme 1	1	1	1	1	4	0	0	0	0	YES	2964.83	3629.84	3297.34	5864.87	5429.42	5647.15	4833.42	4349.31	4591.37	3492.88	4426.32	3959.6	4373.86		0	323.31	150690000000	72414000000	78277000000	10.2721	10.4689	10.4531	10.3638	0.994087	0.469298	0.571959	0.561061	-0.00824688	-0.141398	-0.147586	-0.176935	1.00573	1.10297	1.10771	1.13048
	NPM1	Nucleophosmin	1	1	1	1	4	0	0	0	0	YES	3334.24	3470	3402.12	4314.44	5137.63	4726.03	4205.92	4414.91	4310.41	3883.88	3800.05	3841.97	4070.13		0	323.31	146890000000	66750000000	80143000000	10.2641	10.4161	10.4578	10.4206	0.194473	0.937407	0.979394	0.528395	0.231801	0.00633395	0.000865329	0.188781	0.851571	0.995619	0.9994	0.877347
	CCT8	T-complex protein 1 subunit theta	1	1	1	1	4	0	0	0	0	YES	3752.2	4238.03	3995.11	5225.77	5626.57	5426.17	3334.83	3674.44	3504.64	3270.73	3156.28	3213.51	4034.86		0	292.13	149110000000	71785000000	77328000000	10.3326	10.4932	10.3319	10.2847	0.648523	0.741806	0.959231	0.784567	0.0751904	0.0518593	0.0067647	0.0807941	0.949217	0.964692	0.995322	0.945537
	FLNB	Filamin-B	1	1	1	1	4	0	0	0	0	YES	4036.68	4171.17	4103.93	3285.76	3817.37	3551.56	3748.9	3827.79	3788.35	4772.77	4607.36	4690.07	4033.48		0	323.31	127460000000	64949000000	62510000000	10.2931	10.334	10.3435	10.3606	0.353397	0.744127	0.767742	0.0828914	-0.161718	0.0513026	-0.0795847	-0.524147	1.11862	0.965065	1.05671	1.43808
	MSN	Moesin	1	1	1	1	4	0	0	0	0	YES	4919.57	4669.44	4794.51	4266.01	3285.47	3775.74	2896.05	3186.36	3041.21	3966.31	4458.16	4212.24	3955.92		0	323.31	119750000000	59215000000	60532000000	10.3653	10.3233	10.2847	10.3281	0.925969	0.26256	0.459901	0.301115	-0.0248541	0.195348	0.16723	-0.313298	1.01738	0.873362	0.890551	1.24254
	PRDX6	Peroxiredoxin-6	1	1	1	1	4	0	0	0	0	YES	3612.75	3574.39	3593.57	4471.85	4837.63	4654.74	3149.52	3855.39	3502.46	3321.27	3140.92	3231.1	3745.47		0	240.94	117800000000	57883000000	59917000000	10.2222	10.3614	10.3585	10.3413	0.20159	0.141753	0.451592	0.416582	-0.218917	-0.278951	0.170438	0.243791	1.16386	1.21331	0.888573	0.844523
	LGALS1	Galectin-1	1	1	1	1	4	0	0	0	0	YES	4135.38	4364.48	4249.93	3379.01	3332.25	3355.63	3362.87	3141.55	3252.21	4071.86	3870.93	3971.4	3707.29		0	171.39	112210000000	57063000000	55149000000	10.3051	10.2351	10.2955	10.3103	0.283103	0.379949	0.964631	0.476516	-0.18554	-0.169875	0.00518438	-0.216283	1.13724	1.12496	0.996413	1.16174
	MDH2	Malate dehydrogenase, mitochondrial;Malate dehydrogenase	1	1	1	1	4	0	0	0	0	YES	4163	4094.88	4128.94	3756.39	4598.03	4177.21	2774.1	3199.68	2986.89	3220.43	3706.45	3463.44	3689.12		0	171.16	117500000000	58999000000	58504000000	10.2779	10.359	10.2394	10.2684	0.18093	0.879897	0.943173	0.473521	-0.228892	-0.0357862	-0.0231232	-0.217742	1.17193	1.02512	1.01616	1.16291
	MYH9	Myosin-9	1	1	1	1	4	0	0	0	0	YES	4248.89	4368.71	4308.8	4074.59	3845.3	3959.95	2369.59	2660.7	2515.15	2852.07	3091.42	2971.75	3438.91		0	323.31	115640000000	58120000000	57521000000	10.314	10.3467	10.2315	10.247	0.324273	0.927344	0.401779	0.958323	-0.171174	0.00863036	0.190425	0.0139266	1.12597	0.994036	0.876347	0.990393
	ANXA5	Annexin A5;Annexin	1	1	1	1	4	0	0	0	0	YES	3373.4	3439.86	3406.63	4711.01	3039.57	3875.29	2258.66	2822.58	2540.62	3465.06	4384.82	3924.94	3436.87		0	120.84	111310000000	55266000000	56042000000	10.2159	10.3439	10.1953	10.3242	0.949367	0.853603	0.98609	0.544535	-0.0200332	-0.0419517	-0.00955338	-0.184375	1.01398	1.02951	1.00664	1.13632
	HSPE1	10 kDa heat shock protein, mitochondrial	1	1	1	1	4	0	0	0	0	YES	4921.8	4985.51	4953.65	3902.14	3781.52	3841.83	2397.39	2653.48	2525.43	2402.92	2353.81	2378.36	3424.82		0	44.133	108270000000	51722000000	56544000000	10.3878	10.3508	10.2016	10.1768	0.728691	0.216134	0.726541	0.441376	0.0549179	0.216486	0.0764222	0.230941	0.962649	0.860659	0.948407	0.852079
	EZR	Ezrin	1	1	1	1	4	0	0	0	0	YES	2874.25	3041.15	2957.7	3730.52	3333.79	3532.15	3447.06	2689.2	3068.13	3672.55	3700.9	3686.73	3311.18		0	241.03	96796000000	51817000000	44979000000	10.1557	10.2364	10.2177	10.2398	0.884556	0.0351238	0.22657	0.0636499	-0.0334219	-0.396574	-0.309896	-0.56043	1.02344	1.31638	1.23962	1.47471		+
	EIF4A1	Eukaryotic initiation factor 4A-I	1	1	1	1	4	0	0	0	0	YES	3260.29	3403.82	3332.06	3565.97	4077.05	3821.51	2802.46	2756.25	2779.36	3177.09	2856.69	3016.89	3237.46		0	323.31	108260000000	53779000000	54477000000	10.23	10.3232	10.2321	10.2179	0.860743	0.510377	0.893646	0.956335	-0.0383767	-0.129339	-0.0388509	-0.0183665	1.02696	1.09379	1.0273	1.01281
	TUBB	Tubulin beta chain	1	1	1	1	4	0	0	0	0	YES	3784.92	3669.88	3727.4	2280.33	2268.74	2274.53	3089.8	3642.69	3366.25	3128.9	3613.16	3371.03	3184.8		0	220.57	91865000000	42933000000	48931000000	10.2727	10.0813	10.3221	10.2925	0.76555	0.979111	0.813839	0.906845	0.0458623	-0.00316296	0.0497701	0.0335111	0.968711	1.00219	0.96609	0.97704
	CCT5	T-complex protein 1 subunit epsilon	1	1	1	1	4	0	0	0	0	YES	2517.97	3041.37	2779.67	3267.1	3354.31	3310.71	3271.14	3310.65	3290.9	3042.08	2632.26	2837.17	3054.61		0	323.31	99375000000	47543000000	51832000000	10.1895	10.274	10.2916	10.2306	0.758114	0.759289	0.809399	0.985161	0.0476779	0.0476779	-0.065944	-0.00747806	0.967492	0.967492	1.04677	1.0052
	RPL4	60S ribosomal protein L4	1	1	1	1	4	0	0	0	0	YES	3193.35	3218.22	3205.78	3750.02	3111.57	3430.79	2515.21	2821.85	2668.53	2387.48	2746.53	2567.01	2968.03		0	183.38	92020000000	45718000000	46302000000	10.1912	10.2467	10.2043	10.1685	0.918785	0.476048	0.945858	0.900574	0.00934718	-0.139379	-0.0222731	0.0359054	0.993542	1.10143	1.01556	0.975419
	PDIA6	Protein disulfide-isomerase A6 = P5	1	1	1	1	4	0	0	0	0	YES	950.945	1200.13	1075.54	1202.37	1748.05	1475.21	3457.76	4508.19	3982.97	5104.38	5300.15	5202.27	2934		0	168.41	76155000000	43804000000	32351000000	9.74985	9.89563	10.2101	10.2847	0.672568	0.332209	2.29118e-06	8.10321e-08	0.0690147	-0.186787	-1.19611	-1.61759	0.953289	1.13823	2.29121	3.06861
	NME2;NME2P1;NME1-NME2	Nucleoside diphosphate kinase B;Putative nucleoside diphosphate kinase	1	1	1	1	4	0	0	0	0	YES	3580.11	3024.08	3302.09	2624.01	4125.74	3374.87	2299.91	2970.42	2635.16	2227.16	2534.14	2380.65	2923.19		0	125.17	108780000000	50526000000	58253000000	10.2204	10.3471	10.2174	10.1912	0.921913	0.892973	0.606776	0.347031	-0.025691	0.0164963	0.1149	0.282499	1.01797	0.988631	0.923446	0.822166
	AHNAK	Neuroblast differentiation-associated protein AHNAK	1	1	1	1	4	0	0	0	0	YES	3533.79	3127.42	3330.6	2704.14	3410.84	3057.49	2625	3050.87	2837.94	2360.06	2370.76	2365.41	2897.86		0	323.31	94737000000	51215000000	43522000000	10.1814	10.236	10.2016	10.1323	0.00369582	0.0595986	0.25667	0.478896	-0.485398	-0.355405	-0.291009	-0.215128	1.39997	1.27934	1.2235	1.16081	+
	CCT2	T-complex protein 1 subunit beta	1	1	1	1	4	0	0	0	0	YES	2420.46	1966.65	2193.56	3342.4	2646.75	2994.57	3036.23	3760.33	3398.28	2560.1	2981.11	2770.61	2839.25		0	323.31	88377000000	42374000000	46003000000	10.0566	10.2323	10.3072	10.189	0.455142	0.748231	0.629892	0.508477	0.129349	-0.0671224	-0.126596	-0.201012	0.914244	1.04763	1.09172	1.1495
	S100A6	Protein S100-A6;Protein S100	1	1	1	1	4	0	0	0	0	YES	4423.76	4231.3	4327.53	1907.63	2361.7	2134.66	2305.58	2673.77	2489.67	2187.04	2445.75	2316.4	2817.07		0	175.58	78550000000	38055000000	40495000000	10.2954	10.0601	10.1932	10.1527	0.0778956	0.522083	0.492071	0.516981	-0.298566	0.108223	0.155102	0.194087	1.22992	0.92773	0.898069	0.874126
	PDIA4	Protein disulfide-isomerase A4 = ERp72	1	1	1	1	4	0	0	0	0	YES	707.291	654.234	680.763	1609.99	1696.59	1653.29	3801.41	4637.68	4219.54	4442.81	4602.69	4522.75	2769.09		0	323.31	62910000000	42702000000	20208000000	9.52585	9.81938	10.1275	10.1486	0.969877	2.31557e-09	2.2454e-21	9.29114e-19	-0.00259919	-1.10992	-2.39745	-2.6652	1.0018	2.15834	5.2687	6.34317		+
	GDI2	Rab GDP dissociation inhibitor beta	1	1	1	1	4	0	0	0	0	YES	2662.84	2571.81	2617.32	2514.88	3882.26	3198.57	2364.65	2393.53	2379.09	2934.34	2463.1	2698.72	2723.42		0	323.31	91553000000	42927000000	48626000000	10.13	10.2953	10.1888	10.2028	0.57277	0.714217	0.308463	0.792213	0.0953169	0.0585242	0.232415	0.0777899	0.936067	0.960246	0.851209	0.947508
	LMNA	Prelamin-A/C;Lamin-A/C	1	1	1	1	4	0	0	0	0	YES	3108.98	3330.02	3219.5	2926.41	3240.68	3083.54	2710.33	2191.06	2450.69	2096.38	1929.88	2013.13	2691.72		0	323.31	96464000000	46085000000	50378000000	10.2489	10.2616	10.2052	10.1168	0.670763	0.80075	0.626519	0.234252	-0.0792951	0.0378742	0.108357	0.357833	1.0565	0.974089	0.927644	0.780336
	HYOU1	Hypoxia up-regulated protein 1 = GRP170	1	1	1	1	4	0	0	0	0	YES	293.227	275.031	284.129	2053.76	2064.26	2059.01	3501.35	4004.53	3752.94	4790.17	4287.49	4538.83	2658.73		0	323.31	60769000000	43355000000	17414000000	9.1682	9.94157	10.121	10.1809	0.742714	1.54517e-17	1.11561e-22	9.20372e-21	-0.0634242	-1.58027	-2.47505	-2.81624	1.04494	2.99025	5.55988	7.04324		+
	HNRNPA2B1	Heterogeneous nuclear ribonucleoproteins A2/B1	1	1	1	1	4	0	0	0	0	YES	1981.73	1771.45	1876.59	1856.97	3590.31	2723.64	3257.37	3093.57	3175.47	2937.08	2580.31	2758.69	2633.6		0	323.31	95524000000	44058000000	51466000000	9.99064	10.2273	10.2837	10.2281	0.142835	0.343668	0.862633	0.500181	0.263035	0.163885	0.0352017	0.20201	0.833333	0.892618	0.975895	0.869338
	TARS	Threonine--tRNA ligase, cytoplasmic	1	1	1	1	4	0	0	0	0	YES	2749.36	2484.94	2617.15	2035.26	2859.8	2447.53	2695.42	2692.12	2693.77	2975.95	2457.32	2716.63	2618.77		0	243.3	94911000000	46929000000	47981000000	10.1446	10.1707	10.1839	10.1796	0.453006	0.966918	0.812325	0.705651	0.130008	-0.0155638	-0.0649929	-0.115629	0.913826	1.01085	1.04608	1.08345
	AKR1A1	Alcohol dehydrogenase [NADP(+)]	1	1	1	1	4	0	0	0	0	YES	4467.38	4349.15	4408.26	790.604	859.693	825.149	1657.65	1937.76	1797.71	3292.75	3585.76	3439.25	2617.59		0	39.483	58244000000	34261000000	23983000000	10.2176	9.77836	9.96591	10.1122	0.0121767	0.910427	0.254853	0.0016089	-0.420492	0.0124972	-0.292104	-0.951848	1.33838	0.991375	1.22442	1.93435	+
	HIST1H2BN;HIST1H2BM;HIST1H2BH;HIST2H2BF;HIST1H2BC;HIST1H2BD;HIST1H2BK;H2BFS;HIST1H2BL	Histone H2B;Histone H2B type 1-M;Histone H2B type 1-N;Histone H2B type 1-H;Histone H2B type 2-F;Histone H2B type 1-C/E/F/G/I;Histone H2B type 1-D;Histone H2B type 1-K;Histone H2B type F-S;Histone H2B type 1-L	1	1	1	1	4	0	0	0	0	YES	2886.98	2856.15	2871.56	3226.66	3181.22	3203.94	2195.46	2456.77	2326.11	1735.31	2114.64	1924.98	2581.65		0	180.76	117600000000	42767000000	74838000000	10.22	10.3404	10.3243	10.2612	0.0109634	0.000950046	0.000314753	0.00014873	0.463727	0.591679	0.835277	1.14522	0.725111	0.66357	0.560475	0.45212	+	+
	ANXA1	Annexin A1	1	1	1	1	4	0	0	0	0	YES	2125.08	2419.06	2272.07	784.388	2251.36	1517.87	2742.66	2976.34	2859.5	3249.1	3909.18	3579.14	2557.15		0	323.31	76731000000	38172000000	38559000000	10.0714	10.1365	10.2458	10.2509	0.737016	0.588741	0.557615	0.132456	-0.0646609	0.0901759	-0.152933	-0.454981	1.04584	0.939408	1.11183	1.37076
	CCT6A	T-complex protein 1 subunit zeta	1	1	1	1	4	0	0	0	0	YES	2899	2727.42	2813.21	2813.51	2619.7	2716.6	2530.84	2142.75	2336.8	2430.58	2274.22	2352.4	2554.75		0	318.21	83416000000	38947000000	44469000000	10.1728	10.1961	10.1636	10.1575	0.577225	0.757532	0.6849	0.640525	0.0941009	0.0480967	0.0894982	0.139339	0.936856	0.967212	0.93985	0.907935
	TPM4	Tropomyosin alpha-4 chain	1	1	1	1	4	0	0	0	0	YES	2090.93	2145.75	2118.34	3138.93	3008.93	3073.93	2070.26	2229.13	2149.7	2161.42	2216.65	2189.03	2382.75		0	322.83	82095000000	40087000000	42008000000	10.0168	10.1982	10.1051	10.0741	0.729813	0.61007	0.95286	0.782489	0.0546401	0.0846086	0.00863036	-0.0850222	0.962835	0.94304	0.994036	1.0607
	RPL7A	60S ribosomal protein L7a	1	1	1	1	4	0	0	0	0	YES	3389.08	3170.63	3279.85	1893.04	2473.65	2183.35	1834.3	1975.84	1905.07	1836.16	2151.63	1993.89	2340.54		0	73.835	75050000000	38970000000	36080000000	10.1763	10.0618	10.0559	10.0389	0.503038	0.308942	0.730393	0.818553	-0.119385	-0.195599	-0.0920018	-0.0709665	1.08627	1.1452	1.06585	1.05042
	NCL	Nucleolin	1	1	1	1	4	0	0	0	0	YES	2226.57	2306.88	2266.73	1191.16	1597.32	1394.24	2980.73	2726.05	2853.39	2843.05	2748.75	2795.9	2327.57		0	323.31	77146000000	34545000000	42602000000	10.1221	9.92434	10.2328	10.2319	0.0103953	0.97041	0.905701	0.889548	0.467175	-0.00118347	0.0224743	0.040121	0.72338	1.00082	0.984543	0.972573	+
	HNRNPK	Heterogeneous nuclear ribonucleoprotein K	1	1	1	1	4	0	0	0	0	YES	2407.41	2186.62	2297.02	2698.62	2298.14	2498.38	2379.88	2179.2	2279.54	1964.98	2189.09	2077.03	2287.99		0	279.5	80847000000	37533000000	43314000000	10.0991	10.1631	10.173	10.1284	0.255669	0.42871	0.652435	0.445246	0.201885	0.135666	0.0999011	0.228973	0.869414	0.910249	0.933097	0.853242
	CCT3	T-complex protein 1 subunit gamma	1	1	1	1	4	0	0	0	0	YES	2202.37	2423.37	2312.87	2425.38	2839.05	2632.22	1902.37	2160.45	2031.41	1959.81	1958	1958.9	2233.85		0	323.31	72087000000	33454000000	38633000000	10.0811	10.1593	10.1203	10.1094	0.475547	0.488261	0.346922	0.393281	0.123136	0.117828	0.214249	0.256286	0.918189	0.921574	0.861995	0.83724
	MYL6;PDE6H	Myosin light polypeptide 6	1	1	1	1	4	0	0	0	0	YES	2685.13	2362.03	2523.58	2819.11	2904.67	2861.89	1849.86	1471.12	1660.49	1946.56	1707.74	1827.15	2218.28		0	117.87	77070000000	36230000000	40840000000	10.1092	10.2151	10.0232	10.0361	0.571782	0.247238	0.507988	0.610293	0.095587	0.20201	0.149259	0.152248	0.935891	0.869338	0.901713	0.899847
	CALM2;CALM1;CALM3	Calmodulin	1	1	1	1	4	0	0	0	0	YES	1967.72	1653.07	1810.4	2056.52	1737.42	1896.97	2228.68	2522.93	2375.81	2698.48	2815.43	2756.96	2210.03		0	47.169	69142000000	30615000000	38528000000	10.0023	10.0799	10.181	10.2038	0.155621	0.23451	0.949923	0.744635	0.254594	0.207768	0.00949053	-0.0999737	0.838223	0.865876	0.993443	1.07175
	SPTAN1	Spectrin alpha chain, non-erythrocytic 1	1	1	1	1	4	0	0	0	0	YES	1934.76	2257.48	2096.12	1891.59	2330.1	2110.84	2400.63	2530.73	2465.68	1978.77	2258.7	2118.73	2197.84		0	323.31	72663000000	36794000000	35868000000	10.0074	10.1025	10.1869	10.1254	0.307597	0.418233	0.319201	0.996822	-0.176838	-0.157238	-0.256184	-0.00307618	1.1304	1.11515	1.19432	1.00213
	CCT4	T-complex protein 1 subunit delta	1	1	1	1	4	0	0	0	0	YES	2145.3	2300.92	2223.11	2673.06	2814.49	2743.78	1585.45	2058	1821.73	1748.87	2121.85	1935.36	2180.99		0	312.05	72035000000	35024000000	37011000000	10.0533	10.2303	10.0521	10.0381	0.535482	0.902311	0.935345	0.808348	0.105678	0.0143553	-0.0256028	-0.0749273	0.929368	0.990099	1.0179	1.05331
	PLEC	Plectin	1	1	1	1	4	0	0	0	0	YES	1456.86	1572.47	1514.67	1816.22	1815.72	1815.97	2038.5	2071.55	2055.03	3338.75	3246.49	3292.62	2169.57		0	323.31	71148000000	38973000000	32175000000	9.87831	10.0106	10.0902	10.1974	0.130108	0.0238368	0.113206	0.00662596	-0.2577	-0.424765	-0.404324	-0.819572	1.19557	1.34235	1.32347	1.76488		+
	AHCY	Adenosylhomocysteinase	1	1	1	1	4	0	0	0	0	YES	1858.59	2246.23	2052.41	3225.12	3216.19	3220.66	1704.98	1785.87	1745.42	1404.01	1677.33	1540.67	2139.79		0	123.32	69568000000	34234000000	35334000000	10.0078	10.1788	10.0416	9.99643	0.815462	0.390916	0.810595	0.414506	-0.0478752	-0.166179	0.0507454	0.244887	1.03374	1.12208	0.965437	0.843882
	HSPA4	Heat shock 70 kDa protein 4	1	1	1	1	4	0	0	0	0	YES	1903.56	2106.02	2004.79	2501.6	2642.06	2571.83	1869.87	1864.86	1867.37	2236.88	1971.62	2104.25	2137.06		0	323.31	71229000000	34954000000	36275000000	9.99838	10.2004	10.0725	10.0801	0.891992	0.757742	0.946989	0.868099	0.0156403	-0.0648118	0.0103502	-0.0518926	0.989218	1.04595	0.992851	1.03662
	ANXA3	Annexin A3;Annexin	1	1	1	1	4	0	0	0	0	YES	2047.16	1967.33	2007.24	2002.41	1481.11	1741.76	2349.01	2321.52	2335.26	2304.58	2479.25	2391.92	2119.05		0	195.88	76372000000	33841000000	42531000000	10.0341	10.0728	10.2038	10.188	0.153551	0.256404	0.362479	0.43705	0.255924	0.197991	0.207268	0.233152	0.837451	0.871764	0.866176	0.850774
	RPSA;RPSAP58	40S ribosomal protein SA	1	1	1	1	4	0	0	0	0	YES	2610.7	2469.37	2540.04	1874.62	2085.74	1980.18	1389.93	2338	1863.96	1920.55	2218.47	2069.51	2113.42		0	323.31	71348000000	35759000000	35589000000	10.101	10.0282	10.0769	10.0795	0.552877	0.658958	0.762938	0.990037	-0.106886	-0.0893287	-0.0811711	-0.0056375	1.0769	1.06388	1.05788	1.00392
	HNRNPA1;HNRNPA1L2	Heterogeneous nuclear ribonucleoprotein A1;Heterogeneous nuclear ribonucleoprotein A1, N-terminally processed;Heterogeneous nuclear ribonucleoprotein A1-like 2	1	1	1	1	4	0	0	0	0	YES	1679.34	2135.86	1907.6	2255.38	2636.63	2446.01	2193.59	1945.64	2069.62	2107.51	1829.15	1968.33	2097.89		0	296.25	71191000000	34008000000	37182000000	9.99561	10.1378	10.0847	10.0882	0.310722	0.537568	0.731391	0.355353	0.179001	0.103934	0.0749164	0.277628	0.883314	0.930492	0.949397	0.824946
	HNRNPU	Heterogeneous nuclear ribonucleoprotein U	1	1	1	1	4	0	0	0	0	YES	2081.62	2174.76	2128.19	2766	2324.97	2545.49	1836.57	1816.96	1826.77	1643.55	1797.71	1720.63	2055.27		0	315.8	76334000000	36570000000	39764000000	10.0395	10.1551	10.0903	10.0355	0.487533	0.977437	0.873082	0.637739	0.119555	-0.0131304	-0.0454165	0.140517	0.920471	1.00914	1.03198	0.907194
	RPL13	60S ribosomal protein L13	1	1	1	1	4	0	0	0	0	YES	1883.34	1535	1709.17	2561.69	2395.06	2478.38	1911.52	2405.3	2158.41	1778.25	1822.34	1800.29	2036.56		0	61.905	71751000000	37090000000	34660000000	9.94863	10.1377	10.0802	10.0392	0.741115	0.275727	0.400032	0.77847	-0.063771	-0.208978	-0.217239	-0.0865993	1.04519	1.15587	1.16251	1.06186
	KPNB1	Importin subunit beta-1	1	1	1	1	4	0	0	0	0	YES	1931.82	1907.04	1919.43	2248.94	3269.63	2759.29	1917.44	1559.86	1738.65	2086.2	1308.29	1697.24	2028.65		0	307.74	78981000000	38548000000	40433000000	10.0464	10.247	10.1734	10.161	1	0.753139	0.956403	0.977395	-0.00962592	-0.0659289	-0.0189365	-0.0104104	1.00669	1.04676	1.01321	1.00724
	EEF1D	Elongation factor 1-delta	1	1	1	1	4	0	0	0	0	YES	1689.83	1862.11	1775.97	1933.72	1904.84	1919.28	2216.5	2515.79	2366.14	1788.46	1995.06	1891.76	1988.29		0	323.31	61180000000	31790000000	29390000000	9.95672	10.0027	10.1379	10.0236	0.342661	0.159508	0.332365	0.674997	-0.165143	-0.26741	-0.249445	-0.128156	1.12128	1.20364	1.18875	1.0929
	RPLP1	60S acidic ribosomal protein P1	1	1	1	1	4	0	0	0	0	YES	2458.35	1623.99	2041.17	1955.44	1834.05	1894.75	2004.22	2262.09	2133.16	1504.16	2245.47	1874.81	1985.97		0	317.25	54110000000	27640000000	26470000000	10.0141	9.95237	10.0515	10.0194	0.484535	0.0403049	0.197551	0.43831	-0.124188	-0.386186	-0.329885	-0.235297	1.08989	1.30693	1.25691	1.17715		+
	VCP	Transitional endoplasmic reticulum ATPase	1	1	1	1	4	0	0	0	0	YES	1665.81	1872.29	1769.05	2893.87	2324.46	2609.16	2041.34	2051.83	2046.58	1264.07	1689.29	1476.68	1975.37		0	323.31	65869000000	33517000000	32351000000	9.94583	10.1274	10.085	10.0367	0.953803	0.445068	0.766771	0.646118	0.00115371	-0.148785	-0.0799049	0.136979	0.999201	1.10864	1.05695	0.909422
	YWHAQ	14-3-3 protein theta	1	1	1	1	4	0	0	0	0	YES	2804.44	2849.73	2827.08	1653.74	1255.3	1454.52	1958.52	942.132	1450.33	1879.65	2451.69	2165.67	1974.4		0	212.21	76613000000	36777000000	39836000000	10.1542	9.86903	10.1191	10.0985	0.869644	0.790598	0.754085	0.866206	0.0209111	0.0402613	0.067914	0.0490731	0.98561	0.972479	0.954016	0.966557
	GNB2L1	Guanine nucleotide-binding protein subunit beta-2-like 1;Guanine nucleotide-binding protein subunit beta-2-like 1, N-terminally processed	1	1	1	1	4	0	0	0	0	YES	1757.02	2019.9	1888.46	2815.74	2643.74	2729.74	1864.12	1691.21	1777.67	1424.47	1571.21	1497.84	1973.43		0	323.31	68421000000	33800000000	34621000000	9.96693	10.1577	10.0631	9.93336	0.811224	0.749101	0.999505	0.927348	-0.0487703	-0.0669108	-0.00501486	-0.0293377	1.03438	1.04747	1.00348	1.02054
	RAN	GTP-binding nuclear protein Ran	1	1	1	1	4	0	0	0	0	YES	1945.03	2085.78	2015.4	2288.54	2289.12	2288.83	1640.56	1928.59	1784.57	1733.9	1833.35	1783.62	1968.11		0	40.219	74867000000	31782000000	43085000000	10.021	10.1248	10.1401	10.1014	0.406899	0.387886	0.0443303	0.117381	0.144699	0.148739	0.463936	0.471656	0.904568	0.902039	0.725005	0.721136
	TMSB4XP4;TMSB4X	Thymosin beta-4;Hematopoietic system regulatory peptide	1	1	1	1	4	0	0	0	0	YES	2612.69	2606.18	2609.44	1561.25	1463.66	1512.46	1757.81	1704.36	1731.08	1736.8	1877.46	1807.13	1915.03		0	11.604	42076000000	20538000000	21538000000	10.0662	9.90267	10.0186	10.0286	0.100888	0.828469	0.852974	0.778197	-0.278496	0.0313951	-0.0518626	-0.0867065	1.21293	0.978474	1.0366	1.06194
	RPS7	40S ribosomal protein S7	1	1	1	1	4	0	0	0	0	YES	2132.72	1865.65	1999.18	2767.92	1418.06	2092.99	1912.17	1822.16	1867.17	1392.81	1942.32	1667.56	1906.73		0	175.27	65182000000	32640000000	32542000000	10.0068	10.121	10.0432	10.0303	0.667308	0.826351	0.988673	0.877846	-0.0800727	-0.0483824	-0.00184785	0.0446039	1.05707	1.0341	1.00128	0.969556
	RPS12	40S ribosomal protein S12	1	1	1	1	4	0	0	0	0	YES	1740.71	1709.05	1724.88	2813.2	2509.65	2661.43	1488.7	1805.68	1647.19	1378.23	1662.13	1520.18	1888.42		0	129.8	62544000000	30021000000	32523000000	9.94231	10.1523	10.0041	9.94932	0.609481	0.933001	0.823851	0.897997	0.0854246	0.00733906	-0.061255	0.0368901	0.942507	0.994926	1.04337	0.974754
	G6PD	Glucose-6-phosphate 1-dehydrogenase	1	1	1	1	4	0	0	0	0	YES	1824.04	2017.64	1920.84	2436.74	1239.26	1838	1996.61	2187.09	2091.85	1693.62	1616.99	1655.31	1876.5		0	284.16	65238000000	30188000000	35050000000	9.97897	10.062	10.1262	10.0884	0.878079	0.731256	0.715576	0.162066	0.018919	-0.0712697	0.0798389	0.42094	0.986972	1.05064	0.946163	0.746938
	RPLP2	60S acidic ribosomal protein P2	1	1	1	1	4	0	0	0	0	YES	1920.28	1867.23	1893.76	2107.56	2485.16	2296.36	1620.22	1633.65	1626.93	1667.06	1527.34	1597.2	1853.56		0	221.13	63371000000	31680000000	31691000000	9.96852	10.0854	9.98906	9.97174	0.964121	0.514175	0.577965	0.818045	-0.00125568	-0.128251	-0.145366	-0.0711635	1.00087	1.09297	1.10601	1.05056
	EEF1G	Elongation factor 1-gamma	1	1	1	1	4	0	0	0	0	YES	1307.62	1809.75	1558.68	2217.16	2299.46	2258.31	2133.55	1626.91	1880.23	1231.63	1605.19	1418.41	1778.91		0	127.99	60406000000	30548000000	29858000000	9.92373	10.0694	10.0645	9.88022	0.558279	0.183577	0.619437	0.477619	-0.105566	-0.253223	-0.130318	-0.215747	1.07592	1.19187	1.09454	1.16131
	ACLY	ATP-citrate synthase	1	1	1	1	4	0	0	0	0	YES	2315.79	2636.85	2476.32	1996.58	2682.38	2339.48	1353.79	933.445	1143.62	1099.83	827.5	963.665	1730.77		0	323.31	81384000000	31365000000	50019000000	10.1453	10.2439	10.0754	9.99418	0.0493337	0.00071115	1.61075e-06	0.000187536	0.356144	0.606253	1.11383	1.1277	0.78125	0.656901	0.462064	0.457645	+	+
	HINT1	Histidine triad nucleotide-binding protein 1	1	1	1	1	4	0	0	0	0	YES	1267.58	1610.01	1438.8	2208.95	2303.12	2256.04	1676.05	1434.27	1555.16	1727.71	1359.45	1543.58	1698.39		0	235.3	62194000000	29923000000	32271000000	9.88248	10.0843	9.9592	9.94376	0.352525	0.446692	0.729016	0.89266	0.16337	0.13014	-0.0924633	-0.0425162	0.892937	0.913743	1.06619	1.02991
	PHGDH	D-3-phosphoglycerate dehydrogenase	1	1	1	1	4	0	0	0	0	YES	1268.22	1308.68	1288.45	1351.26	1441.16	1396.21	2162.72	1753.64	1958.18	2058.46	2188.45	2123.46	1691.57		0	209.51	67895000000	26244000000	41651000000	9.97836	10.0244	10.1314	10.1452	1.8564e-08	8.88934e-05	0.340139	0.37523	1.03703	0.703101	0.217355	0.266277	0.487329	0.614251	0.860141	0.831463	+	+
	CCT7	T-complex protein 1 subunit eta	1	1	1	1	4	0	0	0	0	YES	1907.3	1873.2	1890.25	1935.1	1522.61	1728.86	1664.95	1750.39	1707.67	1292.12	1539.85	1415.99	1685.69		0	283.94	55597000000	25677000000	29920000000	9.99791	10.0125	10.0543	9.95293	0.535008	0.824833	0.644144	0.768699	0.105812	0.032242	0.102591	0.0870554	0.929282	0.977899	0.931359	0.941442
	PGAM1	Phosphoglycerate mutase 1	1	1	1	1	4	0	0	0	0	YES	2212	1952.97	2082.49	1911.85	1081.47	1496.66	1356.87	1716.62	1536.74	1503.92	1748.13	1626.03	1685.48		0	190.39	54396000000	27379000000	27017000000	9.99535	10.062	9.9772	9.99774	0.570619	0.551935	0.600806	0.754354	-0.102574	-0.117647	0.116897	0.0927488	1.07369	1.08496	0.922169	0.937734
	TUBA4A	Tubulin alpha-4A chain	1	1	1	1	4	0	0	0	0	YES	1894.89	1713.43	1804.16	1686.66	1887.06	1786.86	1311.08	1637.47	1474.27	1736.96	1520.45	1628.7	1673.5		0	236.84	51215000000	25691000000	25524000000	9.96174	9.9661	9.97859	9.93997	0.167879	0.537488	0.723462	0.254453	-0.235637	-0.121659	0.0773797	-0.345088	1.17743	1.08799	0.947777	1.27023
	HIST1H3A	Histone H3.1	1	1	1	1	4	0	0	0	0	YES	1551.5	1964.98	1758.24	2276.64	1927.23	2101.94	1062.56	1834.58	1448.57	1159.3	1412.35	1285.83	1648.64		0	122.53	68719000000	26931000000	41788000000	10.0804	10.1445	10.0636	9.86787	0.00172037	0.00897769	0.0277798	0.0152514	0.573665	0.466131	0.508124	0.731878	0.671908	0.723903	0.703136	0.602119	+	+
	EIF5A;EIF5AL1;EIF5A2	Eukaryotic translation initiation factor 5A-1;Eukaryotic translation initiation factor 5A-1-like;Eukaryotic translation initiation factor 5A-2	1	1	1	1	4	0	0	0	0	YES	1783.77	1960.38	1872.07	1436.15	1947.76	1691.96	1562.2	1751.77	1656.99	1510.5	1179.28	1344.89	1641.48		0	323.31	58547000000	27614000000	30933000000	9.9767	10.0277	10.0188	9.97331	0.84331	0.738247	0.939283	0.647676	0.0271541	-0.0695579	-0.0243552	0.136323	0.981354	1.0494	1.01703	0.909835
	TAGLN2	Transgelin-2	1	1	1	1	4	0	0	0	0	YES	1751.13	1468.37	1609.75	1573.69	1864.84	1719.27	1559.28	1541.67	1550.48	1347.75	1997.12	1672.44	1637.98		0	288.26	52982000000	25704000000	27278000000	9.96257	9.99055	10.0299	10.0011	0.633855	0.506756	0.245416	0.730424	-0.0876873	-0.130381	0.265797	0.102322	1.06267	1.09458	0.831739	0.931532
	SPTBN1	Spectrin beta chain, non-erythrocytic 1	1	1	1	1	4	0	0	0	0	YES	1735.21	1591.43	1663.32	1838.02	1522.95	1680.49	1737.71	1475.67	1606.69	1357.7	1734.75	1546.23	1624.18		0	323.31	54307000000	28197000000	26110000000	9.89514	9.98556	10.0147	9.95825	0.239157	0.309794	0.484753	0.983268	-0.202539	-0.195269	-0.181231	0.00446549	1.15072	1.14494	1.13385	0.99691
	PARK7	Protein DJ-1	1	1	1	1	4	0	0	0	0	YES	1630.15	1357.63	1493.89	2300.9	2422.7	2361.8	1863.88	1000.58	1432.23	1476.18	782.288	1129.23	1604.29		0	306.07	58274000000	26668000000	31606000000	9.88295	10.1266	10.0086	9.93319	0.577225	0.925461	0.79538	0.487897	0.0941009	0.00906043	0.0553346	0.207893	0.936856	0.993739	0.962371	0.865801
	EEF1B2	Elongation factor 1-beta	1	1	1	1	4	0	0	0	0	YES	1955.3	1567.18	1761.24	1482.97	1290.13	1386.55	1575.97	1786.84	1681.41	1204.59	1864.15	1534.37	1590.89		0	130.32	43661000000	23205000000	20456000000	9.91734	9.81312	9.95009	9.88959	0.512711	0.0550543	0.279652	0.370934	-0.116911	-0.361806	-0.277604	-0.271339	1.08441	1.28503	1.21218	1.20693
	HNRNPM	Heterogeneous nuclear ribonucleoprotein M	1	1	1	1	4	0	0	0	0	YES	1159.93	1438.71	1299.32	1664.37	2001.42	1832.89	1741.14	1479.23	1610.18	1868.11	1307.2	1587.65	1582.51		0	286.86	58264000000	27569000000	30695000000	9.83936	10.0299	10.0533	10.0559	0.466357	0.977185	0.834814	0.542203	0.125916	-0.0131886	0.0434844	0.182438	0.916422	1.00918	0.970309	0.881213
	EPRS	Bifunctional glutamate/proline--tRNA ligase;Glutamate--tRNA ligase;Proline--tRNA ligase	1	1	1	1	4	0	0	0	0	YES	1665.41	1294.48	1479.94	1991.29	1785.81	1888.55	1783.17	1547.6	1665.38	1259.76	1236.46	1248.11	1570.5		0	323.31	53922000000	27141000000	26780000000	9.90933	10.0117	9.99436	9.86899	0.73216	0.579761	0.613699	0.799281	-0.0657175	-0.110059	-0.132372	-0.078457	1.04661	1.07927	1.09609	1.05589
	TUBB8	Tubulin beta-8 chain	1	1	1	1	4	0	0	0	0	YES	1620.36	1731.71	1676.03	956.692	1276.42	1116.55	2185.25	1409.99	1797.62	1679.44	1659.36	1669.4	1564.9		0	58.697	50745000000	23059000000	27686000000	9.96857	9.79659	10.0481	10.0134	0.420542	0.955079	0.908597	0.687694	0.140255	0.00230651	0.0216219	0.119688	0.907359	0.998403	0.985125	0.920387
	IQGAP1	Ras GTPase-activating-like protein IQGAP1	1	1	1	1	4	0	0	0	0	YES	1403.37	1980.32	1691.85	1966.03	1875.91	1920.97	1221.71	1333.6	1277.65	1204.91	1512.85	1358.88	1562.34		0	323.31	50419000000	23392000000	27027000000	9.94843	10.0242	9.97286	9.92407	0.959243	0.797995	0.120373	0.571691	-0.0180012	-0.0551266	0.357158	0.169155	1.01256	1.03895	0.780701	0.889363
	S100A10	Protein S100-A10	1	1	1	1	4	0	0	0	0	YES	2967.06	2726.22	2846.64	546.73	787.991	667.361	1058.51	1277.82	1168.17	1589.02	1417.73	1503.38	1546.38		0	160.97	37644000000	19262000000	18383000000	10.0665	9.52915	9.89947	9.9351	0.000450178	0.0923491	0.317311	0.963713	-0.584674	-0.318398	0.228111	-0.0155783	1.4997	1.24694	0.853752	1.01086	+
	DPYSL2	Dihydropyrimidinase-related protein 2	1	1	1	1	4	0	0	0	0	YES	1042.48	1125.95	1084.21	1731.03	1573.86	1652.44	1453.29	1860.96	1657.13	1514.26	1797.23	1655.75	1512.38		0	323.31	42743000000	24088000000	18655000000	9.73106	9.87993	9.8793	9.85568	0.906684	0.0110998	0.000838303	0.00156049	-0.0288372	-0.476378	-0.846817	-0.954529	1.02019	1.39125	1.79853	1.93795		+
	DYNC1H1	Cytoplasmic dynein 1 heavy chain 1	1	1	1	1	4	0	0	0	0	YES	1367.79	1414.36	1391.08	1381.97	1539.18	1460.57	1324.45	1705.99	1515.22	1573.89	1755.58	1664.74	1507.9		0	323.31	48276000000	23944000000	24332000000	9.85608	9.92902	9.97722	9.98544	0.713909	0.39456	0.520559	0.481385	-0.0697092	-0.164965	-0.16707	-0.213922	1.04951	1.12114	1.12278	1.15984
	YWHAB	14-3-3 protein beta/alpha;14-3-3 protein beta/alpha, N-terminally processed	1	1	1	1	4	0	0	0	0	YES	1252.14	1059.24	1155.69	1420.88	1730.6	1575.74	2476.15	1380.85	1928.5	1219.09	1173.82	1196.45	1464.1		0	284.02	46761000000	22250000000	24510000000	9.77915	9.97691	10.0667	9.82798	0.380536	0.770452	0.818319	0.796585	0.153546	0.0450235	-0.0630474	-0.0795085	0.899038	0.969274	1.04467	1.05666
	SND1	Staphylococcal nuclease domain-containing protein 1	1	1	1	1	4	0	0	0	0	YES	1411.73	1707.84	1559.79	1611.53	1518.72	1565.12	1199.34	1605.97	1402.65	1112.84	1482.36	1297.6	1456.29		0	310.55	51825000000	26819000000	25005000000	9.87163	9.94655	9.9712	9.90777	0.154252	0.398171	0.602402	0.507065	-0.243113	-0.163769	-0.136442	-0.201676	1.18354	1.12021	1.09919	1.15003
	WDR1	WD repeat-containing protein 1	1	1	1	1	4	0	0	0	0	YES	1530.33	1380.44	1455.39	1237.29	1641.6	1439.44	1423.8	1480.95	1452.37	1406.44	1383.36	1394.9	1435.53		0	207.1	47781000000	24995000000	22787000000	9.84315	9.88326	9.90228	9.86809	0.262007	0.218602	0.384893	0.302034	-0.193453	-0.234856	-0.224132	-0.312706	1.1435	1.17679	1.16807	1.24204
	CKB	Creatine kinase B-type	1	1	1	1	4	0	0	0	0	YES	1033.81	1718.57	1376.19	1421.26	2249.53	1835.39	1336.93	1460.73	1398.83	1196.99	1051.46	1124.23	1433.66		0	323.31	51070000000	25531000000	25539000000	9.88634	10.0589	9.97046	9.91914	0.361519	0.130239	0.65224	0.152886	-0.15917	-0.287043	-0.118727	0.430392	1.11664	1.22014	1.08578	0.74206
	IDH1	Isocitrate dehydrogenase [NADP] cytoplasmic	1	1	1	1	4	0	0	0	0	YES	1479.07	1611.68	1545.37	1613.21	1989.11	1801.16	1319.11	1337.9	1328.5	1072.8	939.877	1006.34	1420.34		0	120.7	57203000000	25664000000	31539000000	9.93019	10.004	9.99462	9.92681	0.197442	0.811499	0.180725	0.013735	0.230203	-0.0519076	0.307079	0.7433	0.852515	1.03663	0.808277	0.597372
	RPS3A	40S ribosomal protein S3a	1	1	1	1	4	0	0	0	0	YES	1467.05	1569.98	1518.52	1507.3	1800.03	1653.67	1307.36	1307.7	1307.53	1128.98	1232.66	1180.82	1415.13		0	88.469	49052000000	23827000000	25224000000	9.86342	9.99261	9.92043	9.85468	0.803532	0.965847	0.758124	0.768699	-0.0503979	-0.0158117	0.0666747	0.0870554	1.03555	1.01102	0.954836	0.941442
	TCP1	T-complex protein 1 subunit alpha	1	1	1	1	4	0	0	0	0	YES	1299.34	1189.7	1244.52	1576.07	1299.29	1437.68	1525.82	1131.13	1328.47	1604.45	1518.71	1561.58	1393.06		0	323.31	51992000000	24411000000	27580000000	9.8335	9.91999	9.97787	9.98538	0.39434	0.959508	0.879773	0.67069	0.148869	0.00129788	0.0301242	0.126709	0.901957	0.999101	0.979336	0.915919
	GLS	Glutaminase kidney isoform, mitochondrial	1	1	1	1	4	0	0	0	0	YES	1517.1	1741.83	1629.47	426.593	578.742	502.667	1318.7	1208.5	1263.6	2298.3	2045.35	2171.83	1391.89		0	320.13	36711000000	18802000000	17909000000	9.87191	9.58201	9.87622	9.98376	0.162694	0.00567025	0.873128	0.00912747	-0.238425	0.493955	-0.0454016	-0.787095	1.1797	0.710076	1.03197	1.7256		+
	HNRNPC	Heterogeneous nuclear ribonucleoproteins C1/C2	1	1	1	1	4	0	0	0	0	YES	1420.97	1550.64	1485.8	1502.31	1499.73	1501.02	1212.79	1421.52	1317.16	1227.63	1203.36	1215.49	1379.87		0	95.083	57401000000	26639000000	30762000000	9.92022	9.94665	9.91915	9.88335	0.206094	0.154768	0.47273	0.423793	0.225645	0.250234	0.162339	0.240009	0.855213	0.84076	0.893575	0.84674
	YWHAG	14-3-3 protein gamma;14-3-3 protein gamma, N-terminally processed	1	1	1	1	4	0	0	0	0	YES	1292.81	1158.96	1225.89	1614.44	1835.37	1724.91	1527.11	1132.18	1329.65	1430.97	914.218	1172.59	1363.26		0	323.31	50543000000	23703000000	26840000000	9.83416	9.99148	9.96675	9.86451	0.372644	0.308864	0.749609	0.84887	0.156267	0.176706	0.0692898	0.0557509	0.897344	0.884721	0.953107	0.962094
	RPS8	40S ribosomal protein S8	1	1	1	1	4	0	0	0	0	YES	1379.97	978.488	1179.23	1597.79	1370.85	1484.32	1780.01	1358.76	1569.39	1084.86	1346.78	1215.82	1362.19		0	226.67	45269000000	21829000000	23440000000	9.77709	9.90281	9.96128	9.88926	0.837365	0.885843	0.799836	0.761168	0.0285691	-0.0343967	-0.0690583	0.0900404	0.980392	1.02413	1.04903	0.939496
	AKR1C3	Aldo-keto reductase family 1 member C3	1	1	1	1	4	0	0	0	0	YES	1506.77	1334.67	1420.72	662.961	1042.91	852.934	1974.08	1932.16	1953.12	1201.46	1127.65	1164.55	1347.83		0	213.85	35773000000	19738000000	16035000000	9.75886	9.72643	9.93969	9.78744	0.000576671	0.598572	0.0041213	0.440778	-0.573789	0.0875986	-0.728096	-0.234041	1.48843	0.941088	1.65645	1.17612	+
	RPS27A	Ubiquitin-40S ribosomal protein S27a;Ubiquitin;40S ribosomal protein S27a	1	1	1	1	4	0	0	0	0	YES	1515.13	1498.44	1506.78	1406.45	1336.61	1371.53	1766.72	1240.24	1503.48	1025.47	919.366	972.417	1338.55		0	53.15	45575000000	21537000000	24038000000	9.85528	9.90749	10.0387	9.75601	0.725165	0.302558	0.601175	0.968689	-0.0672433	0.179129	-0.136886	-0.0136983	1.04771	0.883236	1.09953	1.00954
	HNRNPH1	Heterogeneous nuclear ribonucleoprotein H;Heterogeneous nuclear ribonucleoprotein H, N-terminally processed	1	1	1	1	4	0	0	0	0	YES	958.905	741.575	850.24	1464.01	1290.27	1377.14	1805.45	1648.75	1727.1	1600.3	1146.02	1373.16	1331.91		0	187.05	45600000000	21290000000	24310000000	9.7097	9.87406	10.0828	9.95146	0.374513	0.854078	0.747376	0.75912	0.15562	0.0254541	0.0699771	0.0908535	0.897747	0.982511	0.952653	0.938967
	MTHFD1	C-1-tetrahydrofolate synthase, cytoplasmic;Methylenetetrahydrofolate dehydrogenase;Methenyltetrahydrofolate cyclohydrolase;Formyltetrahydrofolate synthetase;C-1-tetrahydrofolate synthase, cytoplasmic, N-terminally processed	1	1	1	1	4	0	0	0	0	YES	1461.16	1110.76	1285.96	1676.3	1742.19	1709.24	1087.44	1175.37	1131.4	1013.71	1379.33	1196.52	1330.78		0	301.44	49947000000	21119000000	28828000000	9.86279	10.0019	9.95551	9.95291	0.141957	0.261969	0.51157	0.552012	0.263635	0.1956	0.147958	0.177981	0.832986	0.87321	0.902527	0.883939
	RPLP0;RPLP0P6	60S acidic ribosomal protein P0;60S acidic ribosomal protein P0-like	1	1	1	1	4	0	0	0	0	YES	1238.05	897.508	1067.78	1760.19	1805.82	1783.01	1327.78	1115.86	1221.82	1211.88	1254.12	1233	1326.4		0	243.43	43918000000	22135000000	21783000000	9.76246	9.98914	9.88347	9.85389	0.375948	0.477915	0.774381	0.739812	-0.154731	-0.138823	0.0617071	0.0985544	1.11321	1.10101	0.95813	0.933968
	PLS3	Plastin-3	1	1	1	1	4	0	0	0	0	YES	1135.77	1171.8	1153.78	1767.4	1752.16	1759.78	1235.64	1070.81	1153.23	1285.15	1178.41	1231.78	1324.64		0	275.73	45831000000	22189000000	23642000000	9.75381	10.0023	9.87028	9.86599	0.74042	0.33283	0.654517	0.981203	-0.0639219	-0.186557	0.0992279	-0.00897258	1.0453	1.13804	0.933532	1.00624
	XRCC5	X-ray repair cross-complementing protein 5	1	1	1	1	4	0	0	0	0	YES	1689.05	1353.25	1521.15	1409.21	1694.02	1551.62	1268.78	1138.19	1203.49	1051.64	990.957	1021.3	1324.39		0	323.31	44483000000	21196000000	23287000000	9.91915	9.9867	9.87054	9.79849	0.507017	0.636648	0.992155	0.621182	0.113834	0.0777899	-0.00763764	0.147567	0.924129	0.947508	1.00531	0.902772
	HNRNPD	Heterogeneous nuclear ribonucleoprotein D0	1	1	1	1	4	0	0	0	0	YES	1532.56	1447.68	1490.12	1667.94	790.19	1229.06	1463.66	1318.98	1391.32	1221.28	1121.39	1171.34	1320.46		0	113.63	44425000000	21117000000	23307000000	9.8804	9.85432	9.91191	9.8816	0.854649	0.744694	0.977578	0.360089	0.0244615	-0.0679842	-0.0122425	0.274888	0.983188	1.04825	1.00852	0.826515
	WARS	Tryptophan--tRNA ligase, cytoplasmic;T1-TrpRS;T2-TrpRS	1	1	1	1	4	0	0	0	0	YES	690.353	962.02	826.187	992.074	912.48	952.277	1806.75	1441	1623.88	1858.96	1505.24	1682.1	1271.11		0	319.67	41805000000	20118000000	21687000000	9.73516	9.73183	9.95663	9.94714	0.00032769	0.884903	0.417195	0.247857	0.658828	0.0183493	-0.209612	-0.349897	0.633392	0.987362	1.15638	1.27447	+
	RPL6	60S ribosomal protein L6	1	1	1	1	4	0	0	0	0	YES	1226.35	1198.16	1212.26	1876.54	1866.97	1871.76	1092.14	1069.02	1080.58	739.642	1038.24	888.939	1263.38		0	85.855	42340000000	20642000000	21698000000	9.80483	9.99388	9.84619	9.71841	0.918355	0.307326	0.622055	0.993527	-0.0264254	-0.196227	0.109829	0.000576887	1.01849	1.1457	0.926698	0.9996
	ALPP;ALPPL2	Alkaline phosphatase, placental type;Alkaline phosphatase, placental-like	1	1	1	1	4	0	0	0	0	YES	1689.68	1505.09	1597.39	1868.87	1030.22	1449.55	1575.57	1533.63	1554.6	414.536	306.806	360.671	1240.55		0	200.45	44268000000	23966000000	20301000000	9.84282	9.94413	9.86088	9.57248	0.0366946	0.0601421	0.0115208	5.96381e-05	-0.352013	-0.354667	-0.641851	1.21207	1.27634	1.27869	1.56033	0.431649	+
	PSME2	Proteasome activator complex subunit 2	1	1	1	1	4	0	0	0	0	YES	983.66	1073.82	1028.74	1404.45	1464.91	1434.68	1368.94	1274.09	1321.51	1391.01	944.549	1167.78	1238.18		0	139.63	40416000000	19903000000	20512000000	9.72856	9.89029	9.87946	9.77934	0.278998	0.67582	0.51885	0.327402	0.191815	-0.0850529	-0.167734	-0.296828	0.875503	1.06073	1.12329	1.22844
	RPL8	60S ribosomal protein L8	1	1	1	1	4	0	0	0	0	YES	986.844	854.752	920.798	1745.76	1391.59	1568.68	1246.66	1260.61	1253.64	1272.69	1051.54	1162.11	1226.31		0	109.68	43343000000	22430000000	20913000000	9.65599	9.91566	9.84067	9.80614	0.759932	0.22472	0.370004	0.63274	-0.0597054	-0.231871	-0.231075	-0.145797	1.04225	1.17436	1.17371	1.10634
	CAP1	Adenylyl cyclase-associated protein 1	1	1	1	1	4	0	0	0	0	YES	961.054	1138.64	1049.85	1427.17	678.722	1052.95	1589.83	1295.6	1442.72	1488.64	1211.28	1349.96	1223.87		0	231	41258000000	20978000000	20280000000	9.74034	9.83232	9.94255	9.88741	0.842149	0.668251	0.712172	0.303905	-0.0422636	-0.086967	-0.0981349	-0.311506	1.02973	1.06213	1.07039	1.241
	TXN	Thioredoxin	1	1	1	1	4	0	0	0	0	YES	1633.49	1307.92	1470.71	866.894	1008.82	937.855	1004.06	1578.04	1291.05	1002.98	1322.78	1162.88	1215.62		0	28.089	37866000000	17699000000	20167000000	9.93086	9.73845	9.856	9.83466	0.181231	0.619037	0.692584	0.797097	0.239154	0.0822938	-0.10479	0.0758749	0.847242	0.944555	1.07534	0.948767
	MIF	Macrophage migration inhibitory factor	1	1	1	1	4	0	0	0	0	YES	1397.64	1538.63	1468.14	1489.57	1643.51	1566.54	720.553	937.667	829.11	991.931	973.614	982.772	1211.64		0	8.6673	46439000000	19775000000	26663000000	9.9032	10.0169	9.74795	9.80877	0.211138	0.193741	0.278636	0.533613	0.223052	0.227864	0.247563	0.186374	0.856751	0.853898	0.842318	0.878812
	PPIB	Peptidyl-prolyl cis-trans isomerase B	1	1	1	1	4	0	0	0	0	YES	741.725	620.649	681.187	1086.17	1587.79	1336.98	1415.86	1510.09	1462.97	1275.82	1324.92	1300.37	1195.38		0	84.595	34217000000	18721000000	15496000000	9.60318	9.86379	9.81022	9.77316	0.962438	0.056106	0.00115845	0.00221966	-0.0173441	-0.360286	-0.823907	-0.923195	1.01209	1.28368	1.77019	1.89631
	FSCN1	Fascin	1	1	1	1	4	0	0	0	0	YES	955.323	1033.48	994.403	1176.66	1516.89	1346.77	1178.68	951.63	1065.15	1465.84	1158.37	1312.11	1179.61		0	273.92	39350000000	20187000000	19163000000	9.65836	9.82353	9.85153	9.89247	0.27957	0.461173	0.995689	0.317311	-0.186836	-0.143851	-0.00652125	-0.303045	1.13827	1.10485	1.00453	1.23375
	TUFM	Elongation factor Tu, mitochondrial	1	1	1	1	4	0	0	0	0	YES	990.823	1194.69	1092.76	1380.35	1365.93	1373.14	1155.26	1005.45	1080.36	1268.69	978.603	1123.65	1167.48		0	210.97	37219000000	19800000000	17419000000	9.702	9.84802	9.75463	9.77719	0.183668	0.586826	0.299064	0.396657	-0.227523	-0.108161	-0.266854	-0.257149	1.17082	1.07785	1.20318	1.19511
	PRDX5	Peroxiredoxin-5, mitochondrial	1	1	1	1	4	0	0	0	0	YES	1369.94	1188.87	1279.41	1347.5	1400.91	1374.2	835.755	1209.96	1022.86	959.804	1007.11	983.458	1164.98		0	101.55	39244000000	18886000000	20359000000	9.78003	9.9153	9.84361	9.7667	0.185886	0.975108	0.936738	0.869837	-0.226426	-0.0136691	0.0133551	0.0476779	1.16993	1.00952	0.990786	0.967492
	XRCC6	X-ray repair cross-complementing protein 6	1	1	1	1	4	0	0	0	0	YES	1927.92	1874.71	1901.32	1233.61	1274	1253.8	706.834	877.267	792.05	711.582	664.344	687.963	1158.78		0	200.56	37801000000	17988000000	19813000000	9.95976	9.8663	9.72982	9.68101	0.710603	0.441504	0.3768	0.244386	-0.0704362	0.131721	0.201007	0.350158	1.05003	0.912742	0.869943	0.784498
	GANAB	Neutral alpha-glucosidase AB = glucosidase II alpha subunit	1	1	1	1	4	0	0	0	0	YES	831.231	929.311	880.271	847.707	872.23	859.968	1148.45	1627.32	1387.89	1333.81	1620.08	1476.94	1151.27		0	142.56	36878000000	18247000000	18631000000	9.64624	9.68509	9.88188	9.93147	0.932158	0.918229	0.608813	0.335357	-0.0235777	-0.0268517	-0.134129	-0.292016	1.01648	1.01879	1.09743	1.22435
	HSPA1A	Heat shock 70 kDa protein 1A/1B	1	1	1	1	4	0	0	0	0	YES	1113.56	1198.54	1156.05	1294.62	1139.61	1217.12	1119.69	1238.37	1179.03	852.376	1209.77	1031.07	1145.82		0	243.31	38104000000	17857000000	20247000000	9.77751	9.83807	9.86763	9.81317	0.418921	0.733133	0.663301	0.697427	0.140779	0.0539454	0.0963968	0.115699	0.90703	0.963298	0.935366	0.922935
	NME1	Nucleoside diphosphate kinase A	1	1	1	1	4	0	0	0	0	YES	1132.27	1168.78	1150.52	1529.86	1914.33	1722.1	831.298	1009.03	920.163	769.967	754.879	762.423	1138.8		0	92.993	50118000000	22509000000	27609000000	9.77806	10.0522	9.85341	9.75625	0.466793	0.62541	0.187505	0.11578	0.125783	0.0806577	0.30229	0.473735	0.916506	0.945626	0.810964	0.720098
	PPA1	Inorganic pyrophosphatase	1	1	1	1	4	0	0	0	0	YES	1168.01	967.006	1067.51	1215.65	1507.43	1361.54	918.649	1147.53	1033.09	1018.1	1112.84	1065.47	1131.9		0	161.55	34776000000	17837000000	16939000000	9.72678	9.83864	9.74476	9.74449	0.72821	0.292715	0.230268	0.278069	-0.0665784	-0.202008	-0.307484	-0.328544	1.04723	1.1503	1.23755	1.25575
	TUBB6	Tubulin beta-6 chain	1	1	1	1	4	0	0	0	0	YES	973.232	992.539	982.886	1057.85	1301.71	1179.78	951.386	1208.58	1079.98	1474.38	1030.63	1252.51	1123.79		0	68.004	29877000000	14549000000	15328000000	9.69166	9.80144	9.79271	9.8285	0.53636	0.369004	0.78398	0.476412	-0.110963	-0.173628	-0.0742436	-0.216334	1.07995	1.12789	1.05281	1.16178
	PRKCSH	Glucosidase 2 subunit beta = glucosidase II beta subunit	1	1	1	1	4	0	0	0	0	YES	1087.29	1106	1096.65	659.538	783.592	721.565	1181.03	1220.59	1200.81	1298	1594.42	1446.21	1116.31		0	141.39	36489000000	18178000000	18311000000	9.73335	9.65384	9.83724	9.85046	0.887188	0.455429	0.392944	0.0724506	-0.0328757	0.127501	-0.220446	-0.542857	1.02305	0.915416	1.16509	1.45686
	PCBP1	Poly(rC)-binding protein 1	1	1	1	1	4	0	0	0	0	YES	927.862	1089.16	1008.51	1289.71	1063.95	1176.83	1162.31	1213.45	1187.88	1130.94	1014.79	1072.87	1111.52		0	207.4	38672000000	18407000000	20265000000	9.69836	9.8335	9.86173	9.83462	0.861836	0.724403	0.835571	0.45874	0.0227584	-0.0729531	-0.0574667	0.222186	0.984349	1.05187	1.04064	0.857265
	PSMA5	Proteasome subunit alpha type-5	1	1	1	1	4	0	0	0	0	YES	984.217	921.379	952.798	1683.06	1327.15	1505.1	954.06	985.646	969.853	963.487	1013.69	988.586	1104.09		0	97.285	35860000000	17938000000	17922000000	9.6811	9.92477	9.73977	9.71446	0.763259	0.222692	0.247689	0.310485	0.0464211	-0.232854	-0.296474	-0.307323	0.968335	1.17516	1.22814	1.23741
	ATP1A1	Sodium/potassium-transporting ATPase subunit alpha-1	1	1	1	1	4	0	0	0	0	YES	719.286	850.899	785.093	1025.38	845.837	935.61	1599.63	1305.02	1452.33	1288.67	1183.72	1236.19	1102.31		0	180.25	34405000000	18142000000	16263000000	9.59511	9.68568	9.8486	9.78384	0.436424	0.771705	0.00476728	0.0731408	-0.137172	-0.0614357	-0.71641	-0.541555	1.09975	1.0435	1.64309	1.45554
	HSD17B10	3-hydroxyacyl-CoA dehydrogenase type-2	1	1	1	1	4	0	0	0	0	YES	903.267	835.186	869.226	1386.03	1338.37	1362.2	1417.96	1014.14	1216.05	941.468	875.334	908.401	1088.97		0	227.02	34779000000	17371000000	17408000000	9.60781	9.87325	9.84087	9.67869	0.296859	0.797759	0.731815	0.406503	-0.180593	0.0385766	-0.0915252	-0.251865	1.13335	0.973615	1.0655	1.19075
	HADHA	Trifunctional enzyme subunit alpha, mitochondrial;Long-chain enoyl-CoA hydratase;Long chain 3-hydroxyacyl-CoA dehydrogenase	1	1	1	1	4	0	0	0	0	YES	1368.99	1339.65	1354.32	1320.33	905.588	1112.96	874.488	740.424	807.456	1023.74	1133.74	1078.74	1088.37		0	323.31	32772000000	16420000000	16352000000	9.79682	9.84027	9.69235	9.81232	0.563637	0.734864	0.981366	0.831538	-0.104263	0.0535284	0.000288558	-0.065944	1.07495	0.963577	0.9998	1.04677
	PSMA4	Proteasome subunit alpha type-4;Proteasome subunit alpha type;Proteasome subunit beta type	1	1	1	1	4	0	0	0	0	YES	842.216	785.556	813.886	1257.86	1295.99	1276.93	1282.48	919.725	1101.1	1263.75	956.191	1109.97	1075.47		0	219.75	39561000000	18840000000	20720000000	9.67073	9.85886	9.86305	9.843	0.47731	0.423919	0.717749	0.912299	0.122606	-0.155421	-0.0962522	-0.0350469	0.918527	1.11375	1.06899	1.02459
	RPL3	60S ribosomal protein L3	1	1	1	1	4	0	0	0	0	YES	1045.59	842.061	943.823	1007.73	1180.08	1093.91	1391.06	953.498	1172.28	1065.51	1038.08	1051.79	1065.45		0	146.71	38549000000	18824000000	19725000000	9.76394	9.78286	9.88776	9.83699	0.739945	0.536983	0.709433	0.762839	0.0521377	-0.1218	-0.0990617	-0.0927555	0.964506	1.08809	1.07108	1.06641
	RPL21	60S ribosomal protein L21	1	1	1	1	4	0	0	0	0	YES	1069.47	1187.89	1128.68	721.974	1005.88	863.929	1061.51	1162.3	1111.9	1145.36	1141.27	1143.31	1061.96		0	48.071	33503000000	16496000000	17007000000	9.74808	9.68172	9.80315	9.79008	0.93902	0.409504	0.521645	0.544137	0.00460933	-0.160056	-0.166648	-0.184556	0.99681	1.11733	1.12245	1.13647
	PABPC1;PABPC3	Polyadenylate-binding protein 1;Polyadenylate-binding protein 3	1	1	1	1	4	0	0	0	0	YES	970.049	1144.45	1057.25	1227.16	1476.13	1351.64	820.845	1033.06	926.951	821.973	976.544	899.258	1058.78		0	243.78	35670000000	18371000000	17298000000	9.72281	9.90187	9.7383	9.71513	0.61859	0.354446	0.965269	0.60036	-0.0912178	-0.178731	-0.0161327	-0.159654	1.06527	1.13189	1.01125	1.11702
	RPL27A	60S ribosomal protein L27a	1	1	1	1	4	0	0	0	0	YES	979.998	1097.92	1038.96	1711.07	1499.95	1605.51	730.917	642.379	686.648	893.905	824.491	859.198	1047.58		0	31.097	39217000000	19336000000	19881000000	9.69337	9.93542	9.66646	9.71697	0.924617	0.405939	0.7261	0.925754	-0.025133	-0.161218	0.0765591	0.0263043	1.01757	1.11823	0.948317	0.981932
	COPG1	Coatomer subunit gamma-1	1	1	1	1	4	0	0	0	0	YES	1099.39	951.822	1025.61	828.365	1362.78	1095.57	833.891	1093.13	963.512	817.741	1279.22	1048.48	1033.29		0	289.92	32560000000	17992000000	14569000000	9.67385	9.78302	9.69157	9.71056	0.0142429	0.0013685	0.0481941	0.070626	-0.41133	-0.598435	-0.503037	-0.546351	1.32991	1.51407	1.41719	1.46039	+	+
	CSE1L	Exportin-2	1	1	1	1	4	0	0	0	0	YES	2146.49	2089.1	2117.8	270.698	313.627	292.163	681.99	1646.64	1164.32	597.658	452.975	525.317	1024.9		0	254.07	31522000000	13112000000	18411000000	10.0782	9.29484	9.96342	9.55514	0.746736	0.32732	0.641668	0.580097	0.0504668	0.169797	0.103397	0.16543	0.965624	0.888968	0.930839	0.891663
	IPO7	Importin-7	1	1	1	1	4	0	0	0	0	YES	763.94	771.429	767.685	1191.7	799.941	995.821	1474.28	883.031	1178.66	1373.22	921.187	1147.2	1022.34		0	289.25	35378000000	17192000000	18185000000	9.56508	9.79105	9.85039	9.86424	0.769566	0.898494	0.760168	0.554941	0.0448837	-0.0314447	-0.0820871	-0.179678	0.969368	1.02204	1.05855	1.13263
	PGM1	Phosphoglucomutase-1	1	1	1	1	4	0	0	0	0	YES	1578.09	1075.63	1326.86	1409.36	1013.22	1211.29	853.176	816.298	834.737	684.635	701.415	693.025	1016.48		0	323.31	36855000000	16498000000	20358000000	9.88836	9.93132	9.76818	9.65325	0.96826	0.615336	0.227564	0.467982	-0.0161472	0.0832474	0.276318	0.217603	1.01126	0.943931	0.825696	0.859993
	ATIC	Bifunctional purine biosynthesis protein PURH;Phosphoribosylaminoimidazolecarboxamide formyltransferase;IMP cyclohydrolase	1	1	1	1	4	0	0	0	0	YES	995.042	930.444	962.743	1153.94	1434.92	1294.43	962.892	972.738	967.815	753.175	810.553	781.864	1001.71		0	246.74	36320000000	17126000000	19193000000	9.6878	9.89895	9.7815	9.69875	0.593228	0.950022	0.661623	0.335714	0.0897694	0.00345838	0.0969364	0.289244	0.939673	0.997606	0.935016	0.818331
	CALU	Calumenin	1	1	1	1	4	0	0	0	0	YES	945.577	846.328	895.953	594.968	681.303	638.135	929.832	1175.19	1052.51	1126.34	1609.92	1368.13	988.682		0	304.95	26457000000	13820000000	12637000000	9.61208	9.58279	9.73374	9.76565	0.923068	0.80075	0.283992	0.032033	0.00834347	0.0378742	-0.275158	-0.64758	0.994233	0.974089	1.21013	1.56654
	BASP1	Brain acid soluble protein 1	1	1	1	1	4	0	0	0	0	YES	905.257	940.264	922.761	952.547	991.001	971.774	1015.24	1113.35	1064.29	933.006	1023.66	978.335	984.291		0	239.41	32402000000	16901000000	15501000000	9.64947	9.69423	9.75224	9.70964	0.752115	0.744259	0.231481	0.44906	-0.0613905	-0.0680901	-0.306698	-0.229856	1.04347	1.04833	1.23687	1.17272
	HNRNPAB	Heterogeneous nuclear ribonucleoprotein A/B	1	1	1	1	4	0	0	0	0	YES	938.369	1016.11	977.239	1031.91	1152	1091.95	912.329	1047.91	980.121	841.327	802.95	822.139	967.863		0	55.03	37022000000	16899000000	20123000000	9.71373	9.81806	9.78814	9.73164	0.175725	0.317652	0.644557	0.21695	0.242328	0.173383	0.102457	0.371503	0.84538	0.886761	0.931446	0.772977
	CTTN	Src substrate cortactin	1	1	1	1	4	0	0	0	0	YES	877.398	879.151	878.275	1352.72	1009.84	1181.28	888.101	926.545	907.323	915.689	876.838	896.263	965.786		0	174.88	34279000000	17406000000	16873000000	9.63852	9.81327	9.71127	9.68196	0.910846	0.894838	0.609824	0.491737	0.0112093	0.0160683	-0.133765	-0.208945	0.99226	0.988924	1.09715	1.15584
	VDAC1	Voltage-dependent anion-selective channel protein 1	1	1	1	1	4	0	0	0	0	YES	1218.15	1077.37	1147.76	853.77	749.647	801.708	1166.44	1140.79	1153.62	805.361	705.391	755.376	964.615		0	141.55	33232000000	17366000000	15866000000	9.70639	9.67404	9.7797	9.6454	0.218342	0.851014	0.0542988	0.83189	-0.211364	0.0261627	-0.490132	-0.0658081	1.15778	0.982029	1.40457	1.04667
	RPS4X	40S ribosomal protein S4, X isoform	1	1	1	1	4	0	0	0	0	YES	1147.31	1037.03	1092.17	1771.93	1066.37	1419.15	628.874	735.261	682.067	614.372	705.335	659.854	963.311		0	86.481	33285000000	14458000000	18827000000	9.82968	9.9977	9.75039	9.65715	0.983294	0.419072	0.00935882	0.19203	-0.0130576	0.138683	0.601031	0.392647	1.00909	0.908348	0.659283	0.761731
	PSAP	Prosaposin;Saposin-A;Saposin-B-Val;Saposin-B;Saposin-C;Saposin-D	1	1	1	1	4	0	0	0	0	YES	712.926	836.168	774.547	879.021	797.155	838.088	1171.71	1191.36	1181.54	1051.64	1029.05	1040.34	958.629		0	39.652	30077000000	15747000000	14330000000	9.57203	9.7034	9.77057	9.70795	0.741323	0.756947	0.0397937	0.0157046	-0.0637258	0.0482362	-0.523255	-0.729411	1.04516	0.967118	1.43719	1.65796
	SET;SETSIP	Protein SET;Protein SETSIP	1	1	1	1	4	0	0	0	0	YES	807.671	658.661	733.166	912.407	1174.65	1043.53	1383.61	740.911	1062.26	1213.84	699.388	956.614	948.892		0	292.23	40049000000	18774000000	21275000000	9.64751	9.79669	9.87406	9.82598	0.268599	0.552831	0.80327	0.664338	0.196229	0.0997664	-0.0679388	0.129349	0.872829	0.933184	1.04822	0.914244
	RPS17L;RPS17	40S ribosomal protein S17-like;40S ribosomal protein S17	1	1	1	1	4	0	0	0	0	YES	990.903	948.574	969.738	1424.56	1889.62	1657.09	459.665	739.206	599.436	502.759	627.289	565.024	947.823		0	72.35	32340000000	15357000000	16983000000	9.66067	10.0564	9.63736	9.56074	0.408359	0.857144	0.464263	0.461723	-0.145127	0.0247452	0.165558	0.220701	1.10583	0.982994	0.891583	0.858148
	CLIC1	Chloride intracellular channel protein 1	1	1	1	1	4	0	0	0	0	YES	963.681	989.442	976.561	1414.58	1386.9	1400.74	763.904	802.797	783.351	527.967	646.518	587.242	936.974		0	141.5	33624000000	16568000000	17056000000	9.68783	9.86508	9.69405	9.5662	0.828333	0.501343	0.934789	0.794515	-0.0451635	-0.131945	0.0139266	-0.0803167	1.0318	1.09577	0.990393	1.05725
	RPL19	Ribosomal protein L19;60S ribosomal protein L19	1	1	1	1	4	0	0	0	0	YES	762.316	898.037	830.177	1357.64	1630.24	1493.94	706.38	823.848	765.114	548.081	765.618	656.85	936.519		0	36.735	34749000000	17868000000	16881000000	9.61998	9.90799	9.62371	9.56981	0.895632	0.347764	0.564428	0.950302	0.0147838	-0.181117	-0.150385	-0.0206477	0.989805	1.13376	1.10987	1.01441
	MDH1	Malate dehydrogenase, cytoplasmic;Malate dehydrogenase	1	1	1	1	4	0	0	0	0	YES	1113.48	1061.89	1087.68	1086.02	796.202	941.109	857.39	766.598	811.994	832.238	930.532	881.385	930.543		0	67.864	31358000000	14434000000	16923000000	9.72934	9.75591	9.7328	9.74923	0.744469	0.679869	0.230928	0.584769	0.051024	0.0669503	0.274292	0.16337	0.965251	0.954654	0.826856	0.892937
	SFN	14-3-3 protein sigma	1	1	1	1	4	0	0	0	0	YES	1028.63	945.024	986.828	1188.4	851.628	1020.01	1142.05	853.561	997.807	793.921	594.78	694.35	924.75		0	201.14	34187000000	15036000000	19151000000	9.72319	9.77834	9.84286	9.63387	0.233879	0.118118	0.180075	0.622399	0.211884	0.275603	0.307545	0.147046	0.863409	0.826105	0.808016	0.903098
	STIP1	Stress-induced-phosphoprotein 1	1	1	1	1	4	0	0	0	0	YES	729.148	621.253	675.201	1392.33	675.504	1033.91	927.887	990.517	959.202	987.543	987.393	987.468	913.946		0	163.55	41001000000	19271000000	21731000000	9.56905	9.86817	9.78835	9.80125	0.0871212	0.832111	0.984618	0.872746	0.30871	0.0305479	-0.0100181	0.0465609	0.807363	0.979048	1.00697	0.968242
	ECHS1	Enoyl-CoA hydratase, mitochondrial	1	1	1	1	4	0	0	0	0	YES	1247.84	931.577	1089.71	692.579	1206.18	949.38	874.082	712.091	793.087	985.741	596.158	790.949	905.781		0	307.07	31393000000	16075000000	15318000000	9.69558	9.78153	9.69227	9.64703	0.182177	0.851772	0.848786	0.722223	-0.228267	-0.0423825	-0.0532093	-0.108939	1.17143	1.02981	1.03757	1.07843
	RPL5	60S ribosomal protein L5	1	1	1	1	4	0	0	0	0	YES	1130.44	1240.62	1185.53	532.186	628.523	580.355	1047.81	920.7	984.256	980.099	763.226	871.662	905.45		0	112.16	31812000000	15142000000	16670000000	9.78468	9.615	9.79158	9.71174	0.642716	0.417031	0.938218	0.816424	0.0766959	-0.157625	-0.0246926	0.0683268	0.948227	1.11545	1.01726	0.953743
	GOT2	Aspartate aminotransferase, mitochondrial	1	1	1	1	4	0	0	0	0	YES	665.694	844.705	755.199	800.121	794.663	797.392	997.088	1097.35	1047.22	1007.68	1026.99	1017.34	904.287		0	135.76	26860000000	13055000000	13805000000	9.59911	9.65332	9.76944	9.73769	0.404523	0.581557	0.257229	0.245863	0.145482	0.0920721	-0.290674	-0.351369	0.904077	0.938174	1.22321	1.27577
	VCL	Vinculin	1	1	1	1	4	0	0	0	0	YES	981.59	1141.66	1061.62	750.426	1096.35	923.39	734.433	754.85	744.642	844.305	920.395	882.35	903.001		0	323.31	31294000000	14402000000	16893000000	9.74102	9.77829	9.70147	9.78917	0.925328	0.360225	0.232325	0.636504	-0.0249862	0.158079	0.273456	0.14104	1.01747	0.896218	0.827335	0.906865
	AARS	Alanine--tRNA ligase, cytoplasmic	1	1	1	1	4	0	0	0	0	YES	749.716	797.793	773.755	913.021	796.349	854.685	1010.7	1165.71	1088.21	797.604	871.77	834.687	887.833		0	323.31	31259000000	14499000000	16759000000	9.65219	9.72276	9.83251	9.73305	0.0358682	0.875597	0.482523	0.930597	0.38084	-0.0367922	-0.182131	0.0244615	0.76799	1.02583	1.13456	0.983188	+
	TALDO1	Transaldolase	1	1	1	1	4	0	0	0	0	YES	776.588	793.638	785.113	932.439	1203.32	1067.88	946.929	805.208	876.069	801.208	838.825	820.017	887.27		0	28.051	29306000000	14669000000	14637000000	9.5751	9.76605	9.7107	9.63643	0.834636	0.614788	0.388633	0.468957	-0.0438392	-0.100747	-0.222414	-0.219975	1.03085	1.07233	1.16668	1.16471
	PSMA7	Proteasome subunit alpha type-7	1	1	1	1	4	0	0	0	0	YES	595.911	798.7	697.305	1433.77	1313.29	1373.53	681.682	753.227	717.454	617.044	842.864	729.954	879.562		0	162.83	34914000000	16708000000	18206000000	9.59361	9.89072	9.67028	9.61677	0.721418	0.930486	0.772133	0.998476	0.0567222	0.00791302	-0.0781372	-0.00129897	0.961446	0.99453	1.05565	1.0009
	DBI	Acyl-CoA-binding protein	1	1	1	1	4	0	0	0	0	YES	891.168	1149.51	1020.34	832.663	747.741	790.202	864.845	890.337	877.591	731.877	890.143	811.01	874.786		0	56.383	28443000000	12143000000	16300000000	9.74084	9.6671	9.7719	9.73355	0.113065	0.0855259	0.173993	0.145326	0.285225	0.304044	0.311968	0.438506	0.820614	0.809979	0.805542	0.737898
	FLNC	Filamin-C	1	1	1	1	4	0	0	0	0	YES	637.596	635.319	636.457	1077.34	1144.08	1110.71	901.714	684.854	793.284	949.226	945.104	947.165	871.905		0	309.29	26730000000	13964000000	12766000000	9.53504	9.73704	9.69703	9.68655	0.213648	0.0353834	0.317311	0.124917	-0.213437	-0.396024	-0.257166	-0.464007	1.15945	1.31588	1.19513	1.37937		+
	PRDX3	Thioredoxin-dependent peroxide reductase, mitochondrial	1	1	1	1	4	0	0	0	0	YES	1083.63	1298.33	1190.98	914.479	903.022	908.751	507.344	751.96	629.652	568.893	934.808	751.851	870.309		0	185.52	30899000000	15774000000	15125000000	9.75722	9.70333	9.58797	9.61737	0.452892	0.615336	0.477794	0.408375	-0.132641	0.0832474	-0.184048	-0.250869	1.0963	0.943931	1.13607	1.18992
	HIST2H2AC;HIST2H2AA3	Histone H2A type 2-C;Histone H2A type 2-A	1	1	1	1	4	0	0	0	0	YES	1122.87	1085.46	1104.16	1206.9	1147.16	1177.03	633.542	716.54	675.041	417.333	627.202	522.268	869.626		0	79.076	36734000000	13479000000	23255000000	9.78731	9.90496	9.81989	9.75675	0.112056	0.00130823	2.01091e-05	1.12318e-05	0.286053	0.575215	0.98943	1.32631	0.820143	0.671186	0.503677	0.398788		+
	ANXA6	Annexin A6	1	1	1	1	4	0	0	0	0	YES	665.176	803.878	734.527	693.761	753.313	723.537	963.703	675.705	819.704	1240.95	1118.7	1179.82	864.398		0	323.31	30847000000	14410000000	16437000000	9.6213	9.6637	9.75504	9.78191	0.0362908	0.108714	0.577277	0.16148	0.379954	0.283092	0.124857	-0.423546	0.768462	0.821828	0.917095	1.34122	+
	RPL28	60S ribosomal protein L28	1	1	1	1	4	0	0	0	0	YES	826.933	790.995	808.964	670.736	1044.37	857.555	871.246	761.077	816.162	1000.63	896.795	948.712	857.848		0	13.715	26743000000	13053000000	13690000000	9.61303	9.64177	9.68981	9.73321	0.677973	0.501561	0.96813	0.951076	0.0676387	-0.131882	-0.0152284	-0.0203551	0.954198	1.09572	1.01061	1.01421
	UGDH	UDP-glucose 6-dehydrogenase	1	1	1	1	4	0	0	0	0	YES	657.622	624.071	640.847	830.284	792.976	811.63	1213.76	982.561	1098.16	903.465	841.042	872.254	855.723		0	323.31	29836000000	14197000000	15639000000	9.56284	9.67901	9.79985	9.71983	0.271245	0.779313	0.33386	0.726908	0.195096	0.0429245	-0.248691	-0.107057	0.873515	0.970685	1.18813	1.07703
	FBXO2	F-box only protein 2	1	1	1	1	4	0	0	0	0	YES	920.062	1132.06	1026.06	822.149	373.159	597.654	827.165	884.411	855.788	818.603	1019.94	919.273	849.694		0	90.725	26321000000	14067000000	12254000000	9.67437	9.72857	9.61243	9.64346	0.0741677	0.309069	0.0357006	0.0478401	-0.302262	-0.19555	-0.534454	-0.597824	1.23308	1.14516	1.44839	1.51343
	PEBP1	Phosphatidylethanolamine-binding protein 1;Hippocampal cholinergic neurostimulating peptide	1	1	1	1	4	0	0	0	0	YES	889.019	1002.59	945.802	947.942	695.115	821.529	996.358	833.509	914.934	720.46	660.226	690.343	843.152		0	140.73	27650000000	12838000000	14812000000	9.67127	9.67595	9.76893	9.65618	0.53264	0.712508	0.48199	0.276812	0.106482	0.0589399	0.158854	0.326997	0.92885	0.959969	0.895736	0.797194
	PCBP2	Poly(rC)-binding protein 2	1	1	1	1	4	0	0	0	0	YES	1057.53	1100.19	1078.86	1056.21	1161.16	1108.69	598.407	685.796	642.101	598.52	456.697	527.609	839.313		0	79.524	26412000000	12737000000	13675000000	9.6951	9.80601	9.603	9.56133	0.35488	0.508126	0.754982	0.394833	-0.16125	-0.129987	0.0676387	0.25544	1.11826	1.09428	0.954198	0.837731
	HNRNPL	Heterogeneous nuclear ribonucleoprotein L	1	1	1	1	4	0	0	0	0	YES	1078.46	1117.03	1097.75	799.891	784.912	792.401	714.224	979.152	846.688	607.837	625.658	616.747	838.396		0	303.32	28464000000	13062000000	15403000000	9.76485	9.72371	9.7416	9.65136	0.549832	0.416169	0.51589	0.233375	0.10165	0.1396	0.146395	0.358509	0.931966	0.90777	0.903506	0.77997
	HNRNPA3	Heterogeneous nuclear ribonucleoprotein A3	1	1	1	1	4	0	0	0	0	YES	467.33	1065.76	766.545	723.333	827.948	775.64	935.828	932.39	934.109	657.696	1094.15	875.921	838.054		0	170.61	28786000000	13816000000	14970000000	9.60704	9.62539	9.74586	9.73326	0.248145	0.845511	0.834346	0.489713	0.205267	0.0274371	0.0436244	0.207018	0.867378	0.981162	0.970214	0.866326
	PTBP1	Polypyrimidine tract-binding protein 1	1	1	1	1	4	0	0	0	0	YES	778.1	563.781	670.941	840.876	765.996	803.436	1228.35	856.89	1042.62	945.151	710.229	827.69	836.172		0	323.31	30493000000	13303000000	17189000000	9.6111	9.66495	9.87478	9.79271	0.291255	0.676535	0.244581	0.28635	0.186754	0.0677764	0.266277	0.320543	0.87858	0.954107	0.831463	0.800769
	NONO	Non-POU domain-containing octamer-binding protein	1	1	1	1	4	0	0	0	0	YES	842.932	768.105	805.519	1051.17	704.287	877.729	1108.75	796.221	952.485	777.184	636.555	706.869	835.651		0	323.31	28987000000	13236000000	15752000000	9.65199	9.71119	9.81771	9.71978	0.607435	0.15535	0.6541	0.38298	0.0859685	0.24987	0.0993626	0.261952	0.942152	0.840972	0.933445	0.833959
	SERPINH1	Serpin H1 = HSP47	1	1	1	1	4	0	0	0	0	YES	1073.76	877.112	975.438	381.541	614.909	498.225	898.068	767.564	832.816	810.611	1172.95	991.778	824.564		0	239.57	29612000000	14559000000	15052000000	9.70219	9.69548	9.71749	9.75811	0.40007	0.386312	0.774835	0.967494	-0.147538	0.149259	0.0615688	-0.0141499	1.10768	0.901713	0.958222	1.00986
	RPL17	60S ribosomal protein L17	1	1	1	1	4	0	0	0	0	YES	834.017	696.628	765.323	1188.25	1219.89	1204.07	730.447	482.172	606.309	726.682	716.739	721.711	824.353		0	55.799	27190000000	13961000000	13229000000	9.57082	9.77546	9.55283	9.59532	0.845127	0.130336	0.541193	0.568594	-0.0416399	-0.286973	-0.159138	-0.17358	1.02928	1.22008	1.11662	1.12785
	HSD17B4	Peroxisomal multifunctional enzyme type 2;(3R)-hydroxyacyl-CoA dehydrogenase;Enoyl-CoA hydratase 2	1	1	1	1	4	0	0	0	0	YES	928.897	857.622	893.26	860.37	895.618	877.994	876.351	845.28	860.816	706.497	608.924	657.711	822.445		0	249.92	27120000000	13512000000	13608000000	9.68684	9.66567	9.69717	9.56467	0.399633	0.885147	0.601219	0.3469	-0.147666	-0.0345593	-0.13687	-0.285161	1.10778	1.02424	1.09952	1.21855
	RPL32	60S ribosomal protein L32	1	1	1	1	4	0	0	0	0	YES	618.612	637.525	628.068	1110.88	1218.13	1164.51	753.297	824.985	789.141	576.172	790.722	683.447	816.291		0	35.767	27279000000	13459000000	13820000000	9.49069	9.76531	9.66007	9.6232	0.879933	0.513074	0.756016	0.820548	-0.0343819	-0.128566	-0.0834622	-0.0701939	1.02412	1.09321	1.05956	1.04986
	SSBP1	Single-stranded DNA-binding protein, mitochondrial	1	1	1	1	4	0	0	0	0	YES	685.147	701.244	693.195	612.851	712.528	662.689	1064.42	909.09	986.757	927.051	880.719	903.885	811.632		0	90.038	27130000000	14027000000	13103000000	9.54496	9.52558	9.74243	9.74016	0.979538	0.585086	0.105911	0.0873996	-0.0138294	-0.108627	-0.412616	-0.516656	1.00963	1.0782	1.3311	1.43064
	PPP1CB	Serine/threonine-protein phosphatase PP1-beta catalytic subunit;Serine/threonine-protein phosphatase	1	1	1	1	4	0	0	0	0	YES	632.382	735.109	683.746	892.759	965.487	929.123	819.873	778.312	799.092	704.663	772.286	738.475	787.609		0	168.83	26740000000	13098000000	13641000000	9.55091	9.69114	9.70548	9.6593	0.554845	0.791789	0.642905	0.881131	-0.106405	0.0399806	0.102994	0.0433446	1.07654	0.972668	0.931099	0.970403
	RPL35	60S ribosomal protein L35	1	1	1	1	4	0	0	0	0	YES	906.053	647.738	776.895	577.062	677.901	627.482	760.615	1119.27	939.944	665.477	928.631	797.054	785.344		0	3.9318	24966000000	12701000000	12266000000	9.56276	9.49725	9.71095	9.6342	0.42486	0.452123	0.445321	0.714722	-0.140412	-0.146611	-0.197501	-0.11196	1.10222	1.10697	1.14671	1.0807
	PPP2R1A	Serine/threonine-protein phosphatase 2A 65 kDa regulatory subunit A alpha isoform	1	1	1	1	4	0	0	0	0	YES	739.544	885.044	812.294	610.026	982.423	796.225	676.229	642.598	659.413	736.68	874.146	805.413	768.336		0	204.79	24891000000	12001000000	12890000000	9.59372	9.69874	9.65815	9.7184	0.961444	0.800151	0.511929	0.78769	-0.0175485	0.0380147	0.147828	0.0795658	1.01224	0.973994	0.902609	0.946342
	RPS6	40S ribosomal protein S6	1	1	1	1	4	0	0	0	0	YES	864.344	671.564	767.954	752.321	1186.97	969.647	832.027	523.015	677.521	631.062	661.866	646.464	765.396		0	50.468	31560000000	15968000000	15591000000	9.60079	9.80122	9.69994	9.65057	0.860956	0.627683	0.801785	0.693023	-0.0383323	-0.0973784	-0.0684229	-0.120765	1.02693	1.06983	1.04857	1.08731
	PSMA1	Proteasome subunit alpha type-1;Proteasome subunit alpha type	1	1	1	1	4	0	0	0	0	YES	659.015	745.42	702.218	669.124	835.059	752.092	918.244	803.317	860.781	815.469	677.269	746.369	765.365		0	101.94	29523000000	14047000000	15476000000	9.58601	9.70733	9.71667	9.63328	0.530278	0.70853	0.977992	0.943677	0.107152	0.059909	-0.0121117	0.0194884	0.928419	0.959325	1.00843	0.986582
	RPL24	60S ribosomal protein L24	1	1	1	1	4	0	0	0	0	YES	665.375	787.52	726.447	850.086	940.12	895.103	686.779	712.083	699.431	783.358	678.148	730.753	762.934		0	15.851	22987000000	11420000000	11567000000	9.54621	9.69898	9.58977	9.60001	0.954421	0.554604	0.469955	0.61762	0.00100953	-0.116911	-0.187247	-0.152227	0.9993	1.08441	1.13859	1.11128
	PSME1	Proteasome activator complex subunit 1	1	1	1	1	4	0	0	0	0	YES	804.009	817.887	810.948	638.623	551.902	595.263	776.205	860.949	818.577	825.342	780.047	802.695	756.871		0	52.228	23562000000	11018000000	12544000000	9.64178	9.63881	9.69303	9.6743	0.177194	0.936148	0.764693	0.856959	0.241474	0.00662125	-0.0805913	-0.0561612	0.845881	0.995421	1.05745	1.0397
	RPS11	40S ribosomal protein S11	1	1	1	1	4	0	0	0	0	YES	839.828	1044.13	941.981	1000.98	599.095	800.036	526.629	763.78	645.205	641.319	638.757	640.038	756.815		0	50.411	25460000000	12178000000	13282000000	9.6655	9.69316	9.64523	9.56497	0.986128	0.963767	0.326611	0.816071	-0.0124754	-0.0162931	0.22367	0.0684644	1.00868	1.01136	0.856384	0.953653
	IPO5	Importin-5	1	1	1	1	4	0	0	0	0	YES	1103.13	726.958	915.046	564.483	946.572	755.527	722.449	426.383	574.416	809.984	726.147	768.066	753.264		0	323.01	26529000000	12516000000	14012000000	9.71805	9.71941	9.58526	9.65982	0.477752	0.801948	0.860375	0.545692	0.122474	0.037593	-0.0494868	-0.183851	0.918611	0.974279	1.0349	1.13591
	S100A4	Protein S100-A4	1	1	1	1	4	0	0	0	0	YES	1555.64	1286.32	1420.98	339.581	326.897	333.239	593.472	668.755	631.114	671.228	528.32	599.774	746.277		0	7.1942	24039000000	10250000000	13789000000	9.88631	9.31201	9.68643	9.78714	0.386648	0.069249	0.0299508	0.0127749	-0.151506	0.321697	0.50121	0.751121	1.11073	0.800128	0.706514	0.594142
	DDX3X;DDX3Y	ATP-dependent RNA helicase DDX3X;ATP-dependent RNA helicase DDX3Y	1	1	1	1	4	0	0	0	0	YES	680.411	699.431	689.921	650.996	928.683	789.839	749.238	1049.86	899.55	585.967	606.485	596.226	743.884		0	219.09	25370000000	11839000000	13531000000	9.59132	9.66597	9.78486	9.60373	0.716403	0.257276	0.729184	0.278665	0.0579701	0.197614	0.0756011	0.325732	0.960615	0.871992	0.948947	0.797894
	DDX39A	ATP-dependent RNA helicase DDX39A	1	1	1	1	4	0	0	0	0	YES	713.977	642.646	678.312	1019.09	1098.85	1058.97	640.737	616.53	628.634	614.779	603.967	609.373	743.822		0	144.77	31023000000	14554000000	16470000000	9.59503	9.78953	9.62139	9.58161	0.275996	0.31256	0.553561	0.490752	0.193078	0.175301	0.133037	0.206518	0.874738	0.885583	0.91191	0.866626
	RPS2	40S ribosomal protein S2	1	1	1	1	4	0	0	0	0	YES	1054.26	1042.77	1048.52	836.424	646.5	741.462	705.74	496.192	600.966	654.029	508.593	581.311	743.064		0	85.248	21918000000	10408000000	11510000000	9.69039	9.61589	9.63377	9.57753	0.246999	0.791222	0.274043	0.729422	-0.199355	-0.0567463	0.249991	0.102725	1.14818	1.04012	0.840901	0.931272
	RPL23A	60S ribosomal protein L23a	1	1	1	1	4	0	0	0	0	YES	792.285	722.04	757.162	422.84	1209.77	816.307	675.743	728.182	701.962	601.498	771.447	686.472	740.476		0	27.481	23008000000	11923000000	11085000000	9.58206	9.69267	9.58298	9.5604	0.429546	0.149913	0.450816	0.60875	-0.139093	-0.273518	-0.195187	-0.156032	1.10121	1.20875	1.14487	1.11422
	AKR1C1;AKR1C2	Aldo-keto reductase family 1 member C1;Aldo-keto reductase family 1 member C2	1	1	1	1	4	0	0	0	0	YES	460.54	375.834	418.187	362.361	479.935	421.148	1447.78	1347.97	1397.87	767.624	680.991	724.307	740.379		0	114.17	19956000000	11742000000	8214000000	9.29603	9.41661	9.74106	9.51374	6.2984e-06	0.606398	3.20474e-05	0.0346811	-0.749766	0.0855606	-1.0531	-0.637962	1.68152	0.942418	2.07499	1.55613	+
	RPL15	60S ribosomal protein L15;Ribosomal protein L15	1	1	1	1	4	0	0	0	0	YES	849.3	668.021	758.66	863.133	1385.44	1124.28	480.441	508.24	494.341	511.276	603.666	557.471	733.689		0	31.758	23334000000	11321000000	12013000000	9.59576	9.78122	9.53062	9.53494	0.668261	0.999873	0.356028	0.691578	0.0701145	-0.00788421	0.21014	0.118094	0.952562	1.00548	0.864454	0.921404
	RPL14	60S ribosomal protein L14	1	1	1	1	4	0	0	0	0	YES	901.436	918.055	909.746	531.25	828.241	679.745	612.368	580.996	596.682	689.627	794.318	741.972	732.036		0	17.759	22630000000	11183000000	11447000000	9.63819	9.6416	9.61333	9.5946	0.644411	0.234569	0.589364	0.507383	-0.0852671	-0.227185	0.12075	-0.201526	1.06088	1.17055	0.919709	1.14991
	TLN1	Talin-1	1	1	1	1	4	0	0	0	0	YES	694.325	695.457	694.891	1049.48	794.736	922.109	515.05	578.764	546.907	805.909	626.006	715.958	719.966		0	323.31	26577000000	12781000000	13797000000	9.52372	9.7648	9.64454	9.6892	0.481362	0.844828	0.360788	0.870639	-0.125022	-0.0440177	0.208018	-0.0509208	1.09052	1.03098	0.865726	1.03593
	RARS	Arginine--tRNA ligase, cytoplasmic	1	1	1	1	4	0	0	0	0	YES	511.299	899.548	705.423	944.872	908.961	926.917	588.951	598.15	593.551	603.199	683.169	643.184	717.269		0	117.96	25145000000	12805000000	12340000000	9.58673	9.6798	9.66069	9.58938	0.327151	0.279606	0.604025	0.755871	-0.170215	-0.207361	-0.135855	-0.095512	1.12523	1.15457	1.09874	1.06844
	OLA1	Obg-like ATPase 1	1	1	1	1	4	0	0	0	0	YES	851.608	851.956	851.782	381.165	1203.39	792.28	567.825	803.536	685.681	726.173	306.426	516.299	711.511		0	84.231	25660000000	11236000000	14425000000	9.64443	9.77662	9.67478	9.52728	0.963006	0.802547	0.142735	0.360504	-0.0172273	0.0374524	0.33674	0.274649	1.01201	0.974374	0.791828	0.826651
	HIST1H4A	Histone H4	1	1	1	1	4	0	0	0	0	YES	612.435	509.331	560.883	848.551	835.499	842.025	784.924	869.717	827.32	568.963	653.788	611.376	710.401		0	83.747	33853000000	11230000000	22623000000	9.55096	9.77868	9.90892	9.81585	0.000537926	7.13786e-05	1.95805e-06	4.72754e-06	0.634407	0.71264	1.10467	1.38211	0.644205	0.610203	0.465008	0.383656	+	+
	RPL22	60S ribosomal protein L22	1	1	1	1	4	0	0	0	0	YES	630.265	779.21	704.737	815.241	762.331	788.786	616.144	593.929	605.037	733.515	731.778	732.646	707.802		0	111.75	23114000000	11121000000	11993000000	9.56109	9.60068	9.58844	9.62079	0.763259	0.701723	0.448955	0.980741	0.0464211	-0.0785636	0.171463	-0.00914677	0.968335	1.05597	0.887942	1.00636
	SLC25A6	ADP/ATP translocase 3;ADP/ATP translocase 3, N-terminally processed	1	1	1	1	4	0	0	0	0	YES	692.382	673.467	682.925	882.167	867.318	874.743	807.661	879.296	843.479	395.44	461.314	428.377	707.381		0	35.503	23327000000	11419000000	11908000000	9.51084	9.67193	9.6519	9.4562	0.229068	0.519689	0.109676	0.165086	-0.206745	0.108892	-0.408282	0.41792	1.15408	0.9273	1.3271	0.748503
	RPL34	60S ribosomal protein L34	1	1	1	1	4	0	0	0	0	YES	679.878	666.963	673.42	970.123	862.113	916.118	599.987	613.705	606.846	626.306	629	627.653	706.009		0	17.257	22095000000	11691000000	10404000000	9.5106	9.62433	9.53095	9.5351	0.697347	0.111277	0.533048	0.739664	-0.0733629	-0.301675	-0.16225	-0.101954	1.05217	1.23257	1.11903	1.07323
	DLD	Dihydrolipoyl dehydrogenase, mitochondrial	1	1	1	1	4	0	0	0	0	YES	509.874	460.946	485.41	798.893	652.145	725.519	703.431	755.029	729.23	911.771	840.884	876.327	704.122		0	154.4	23874000000	11433000000	12441000000	9.37175	9.65473	9.65073	9.6779	0.897576	0.28579	0.696948	0.63576	-0.0307224	0.18574	-0.103302	-0.14452	1.02152	0.879198	1.07423	1.10536
	PSMA6	Proteasome subunit alpha type;Proteasome subunit alpha type-6	1	1	1	1	4	0	0	0	0	YES	684.335	710.135	697.235	932.439	672.527	802.483	592.475	733.467	662.971	685.513	599.152	642.332	701.255		0	66.375	24676000000	12085000000	12591000000	9.55493	9.69651	9.57138	9.54392	0.318308	0.685443	0.542548	0.778119	0.176067	0.0655723	-0.158623	-0.0867372	0.885112	0.955566	1.11622	1.06197
	PA2G4	Proliferation-associated protein 2G4	1	1	1	1	4	0	0	0	0	YES	724.317	768.559	746.438	968.818	881.834	925.326	627.902	623.26	625.581	567.6	418.272	492.936	697.57		0	171.98	23875000000	10885000000	12990000000	9.59509	9.72787	9.60593	9.54125	0.210654	0.801948	0.390038	0.130032	0.223299	0.037593	0.195348	0.455965	0.856604	0.974279	0.873362	0.729022
	CSTB	Cystatin-B	1	1	1	1	4	0	0	0	0	YES	526.128	530.996	528.562	1065.98	910.574	988.279	664.722	568.031	616.377	718.752	575.195	646.974	695.048		0	72.624	32489000000	14815000000	17674000000	9.48698	9.75197	9.64586	9.61947	0.22996	0.502649	0.394224	0.337285	0.213752	0.1137	0.193582	0.288299	0.862292	0.924214	0.874432	0.818867
	SERPINB6	Serpin B6	1	1	1	1	4	0	0	0	0	YES	577.373	633.657	605.515	947.021	1020.25	983.637	491.843	563.802	527.822	654.178	661.969	658.073	693.762		0	188.63	22153000000	11129000000	11025000000	9.5125	9.71844	9.52865	9.55727	0.688301	0.255831	0.992109	0.480347	0.0650208	-0.217524	-0.00765207	-0.214424	0.955932	1.16274	1.00532	1.16024
	PHB	Prohibitin	1	1	1	1	4	0	0	0	0	YES	962.646	794.167	878.407	719.111	768.562	743.837	354.835	746.001	550.418	440.825	760.66	600.743	693.351		0	181.8	24422000000	12039000000	12383000000	9.61849	9.64365	9.53753	9.55335	0.656436	0.795369	0.842323	0.828836	-0.08253	0.0391384	0.041243	0.0635029	1.05887	0.973236	0.971817	0.956938
	RPL12	60S ribosomal protein L12	1	1	1	1	4	0	0	0	0	YES	776.11	698.645	737.378	990.001	707.586	848.794	640.478	617.082	628.78	531.924	568.892	550.408	691.34		0	47.849	21973000000	10375000000	11598000000	9.57508	9.67697	9.60603	9.53394	0.515234	0.498783	0.474094	0.518331	-0.11627	-0.132689	0.161823	0.193456	1.08393	1.09633	0.893895	0.874508
	COPB2	Coatomer subunit beta	1	1	1	1	4	0	0	0	0	YES	469.766	556.129	512.947	941.879	679.184	810.532	784.284	574.786	679.535	758.354	737.829	748.091	687.776		0	294.48	23429000000	11866000000	11563000000	9.35913	9.65525	9.56554	9.55003	0.0268398	0.00845472	0.0785835	0.0733421	-0.372449	-0.493682	-0.44843	-0.541177	1.29455	1.40803	1.36455	1.45516	+	+
	ATP5O	ATP synthase subunit O, mitochondrial	1	1	1	1	4	0	0	0	0	YES	747.822	819.398	783.61	1019.01	904.489	961.751	474.388	571.595	522.992	419.339	465.345	442.342	677.674		0	50.343	22463000000	11255000000	11208000000	9.54097	9.71664	9.51084	9.43785	0.0174517	0.610595	0.43916	0.407187	-0.399197	0.0844725	0.175301	0.248778	1.31877	0.943129	0.885583	0.841609	+
	PSMA2	Proteasome subunit alpha type-2	1	1	1	1	4	0	0	0	0	YES	421.888	437.665	429.776	804.803	953.317	879.06	479.68	630.794	555.237	860.446	803.584	832.015	674.022		0	121.21	21029000000	10020000000	11009000000	9.3548	9.70618	9.5251	9.68647	0.629098	0.995154	0.811442	0.99345	0.0802483	-0.00681117	-0.0652797	-0.00434903	0.945895	1.00473	1.04629	1.00302
	HDGF	Hepatoma-derived growth factor	1	1	1	1	4	0	0	0	0	YES	710.992	708.677	709.835	487.395	586.36	536.877	772.21	800.329	786.27	635.615	651.372	643.493	669.119		0	127.84	23866000000	12190000000	11676000000	9.53092	9.5184	9.62907	9.57528	0.88733	0.417983	0.437134	0.820548	-0.0328461	-0.157319	-0.200979	-0.0701939	1.02303	1.11521	1.14948	1.04986
	LRPPRC	Leucine-rich PPR motif-containing protein, mitochondrial	1	1	1	1	4	0	0	0	0	YES	982.386	902.645	942.515	645.516	685.174	665.345	529.449	512.38	520.915	615.312	480.051	547.682	669.114		0	256.54	22435000000	10965000000	11471000000	9.78842	9.58547	9.54489	9.54543	0.0663608	0.824833	0.959231	0.840143	-0.310522	0.032242	0.0067647	-0.0626255	1.24016	0.977899	0.995322	1.04436
	GARS	Glycine--tRNA ligase	1	1	1	1	4	0	0	0	0	YES	382.671	405.899	394.285	1014.64	794.589	904.614	824.978	620.549	722.763	650.738	634.179	642.458	666.03		0	323.31	21741000000	12528000000	9212900000	9.25729	9.69818	9.55269	9.495	0.287536	0.0233455	0.0440101	0.00993542	0.188274	-0.426238	-0.512699	-0.778308	0.877655	1.34372	1.42672	1.71512		+
	SFPQ	Splicing factor, proline- and glutamine-rich	1	1	1	1	4	0	0	0	0	YES	558.134	496.443	527.289	573.109	491.49	532.3	674.495	755.427	714.961	897.04	785.702	841.371	653.98		0	255.03	24505000000	11101000000	13404000000	9.48882	9.55089	9.71127	9.7012	0.108795	0.105163	0.464936	0.803749	0.288772	0.286053	0.165301	0.0732718	0.818599	0.820143	0.891742	0.95048
	DDX17	Probable ATP-dependent RNA helicase DDX17	1	1	1	1	4	0	0	0	0	YES	676.391	705.338	690.865	636.244	553.163	594.703	716.477	807.887	762.182	506.058	590.274	548.166	648.979		0	2.0064	198750000	84970000	113780000	NaN	8.10633	NaN	NaN	1	0.0501169	1	1	NaN	0.584193	NaN	NaN	NaN	0.667022	NaN	NaN
	RPL11	60S ribosomal protein L11	1	1	1	1	4	0	0	0	0	YES	700.509	648.674	674.592	1309.21	1189.24	1249.23	364.445	267.255	315.85	334.776	355.107	344.941	646.152		0	41.811	22403000000	10849000000	11553000000	9.50684	9.82547	9.38373	9.36244	0.92789	0.991901	0.186834	0.186286	-0.0244578	-0.00978573	0.302758	0.397803	1.0171	1.00681	0.810701	0.759013
	EIF4G1	Eukaryotic translation initiation factor 4 gamma 1	1	1	1	1	4	0	0	0	0	YES	658.506	488.421	573.463	658.786	843.051	750.918	745.697	552.501	649.099	642.675	576.122	609.398	645.72		0	140.72	21736000000	11499000000	10237000000	9.45855	9.60349	9.6081	9.61679	0.151557	0.0423679	0.667608	0.986304	-0.244651	-0.382363	-0.11338	0.00331442	1.18481	1.30347	1.08176	0.997705		+
	RBBP7	Histone-binding protein RBBP7	1	1	1	1	4	0	0	0	0	YES	512.843	756.245	634.544	558.611	637.761	598.186	754.262	719.146	736.704	608.55	616.242	612.396	645.458		0	104.99	23536000000	10729000000	12808000000	9.56321	9.62802	9.65053	9.59693	0.507935	0.160075	0.869284	0.321077	0.113567	0.246955	0.0332292	0.298189	0.9243	0.842673	0.97723	0.813273
	RPS28	40S ribosomal protein S28	1	1	1	1	4	0	0	0	0	YES	851.449	457.698	654.574	829.9	809.472	819.686	456.618	554.482	505.55	748.395	428.061	588.228	642.009		0	64.852	18502000000	9337300000	9164200000	9.49701	9.6261	9.44578	9.51435	0.615124	0.834541	0.605561	0.887349	0.0839282	0.0299829	-0.135301	0.0409626	0.943485	0.979432	1.09832	0.972006
	EIF2S3;EIF2S3L	Eukaryotic translation initiation factor 2 subunit 3;Putative eukaryotic translation initiation factor 2 subunit 3-like protein	1	1	1	1	4	0	0	0	0	YES	752.797	722.901	737.849	725.413	610.018	667.716	676.723	503.166	589.944	525.922	617.905	571.913	641.856		0	126.07	23407000000	10698000000	12709000000	9.56891	9.62481	9.60653	9.55143	0.675808	0.476398	0.253249	0.490752	0.0681893	0.121281	0.26135	0.206518	0.953834	0.919371	0.834307	0.866626
	NAP1L1	Nucleosome assembly protein 1-like 1	1	1	1	1	4	0	0	0	0	YES	690.814	599.912	645.363	323.548	644.161	483.855	632.642	741.975	687.308	712.491	769.776	741.133	639.415		0	111.27	23882000000	11202000000	12680000000	9.56425	9.63406	9.61293	9.63678	0.291255	0.946668	0.923845	0.960206	0.186754	-0.0202526	-0.0292494	0.0132121	0.87858	1.01414	1.02048	0.990884
	DDB1	DNA damage-binding protein 1	1	1	1	1	4	0	0	0	0	YES	554.632	442.975	498.803	921.464	933.302	927.383	621.152	614.923	618.037	499.178	461.956	480.567	631.198		0	128.43	20511000000	10204000000	10307000000	9.39827	9.72491	9.55093	9.4881	0.561466	0.936372	0.446731	0.855353	-0.10479	-0.0226394	-0.196905	0.0532504	1.07534	1.01582	1.14624	0.963762
	SLC3A2	4F2 cell-surface antigen heavy chain	1	1	1	1	4	0	0	0	0	YES	346.151	214.961	280.556	741.43	876.996	809.213	882.023	813.7	847.862	615.931	514.382	565.157	625.697		0	188.49	19312000000	10116000000	9196100000	9.17496	9.59576	9.60877	9.49864	0.0888702	0.00254012	0.0217792	0.575936	0.306962	-0.564734	-0.583312	-0.170329	0.808342	1.47911	1.49828	1.12532		+
	ACTN1	Alpha-actinin-1	1	1	1	1	4	0	0	0	0	YES	486.29	499.941	493.115	635.546	700.013	667.779	550.177	578.569	564.373	796.898	723.526	760.212	621.37		0	323.31	21709000000	10846000000	10863000000	9.41387	9.59121	9.50488	9.57411	0.688301	0.846469	0.739991	0.165728	0.0650208	-0.043631	-0.0887916	-0.419314	0.955932	1.0307	1.06348	1.33729
	PLIN3	Perilipin-3	1	1	1	1	4	0	0	0	0	YES	478.959	898.943	688.951	487.548	553.375	520.462	460.411	575.159	517.785	594.571	875.096	734.833	615.508		0	213.34	20844000000	10540000000	10303000000	9.59432	9.50602	9.51072	9.5793	0.510684	0.735585	0.583496	0.504035	-0.117427	-0.070209	0.122739	-0.203103	1.0848	1.04987	0.918442	1.15117
	MATR3	Matrin-3	1	1	1	1	4	0	0	0	0	YES	654.821	647.284	651.053	413.584	405.975	409.78	897.743	794.322	846.033	617.921	468.695	543.308	612.543		0	302.81	27592000000	11526000000	16066000000	9.68808	9.45793	9.80263	9.63275	0.250911	0.346207	0.416263	0.266392	0.204015	0.162984	0.184471	0.334225	0.868131	0.893176	0.879972	0.79321
	PSMA3	Proteasome subunit alpha type-3	1	1	1	1	4	0	0	0	0	YES	443.292	602.164	522.728	559.41	364.559	461.985	698.642	902.515	800.578	563.839	765.246	664.542	612.458		0	44.098	20716000000	9949000000	10767000000	9.47432	9.4364	9.65233	9.60632	0.456427	0.950654	0.645841	0.906303	0.128953	0.00331442	-0.120969	-0.0373251	0.914495	0.997705	1.08746	1.02621
	SNRPD3	Small nuclear ribonucleoprotein Sm D3	1	1	1	1	4	0	0	0	0	YES	938.21	887.234	912.722	454.507	391.151	422.829	505.602	544.407	525.004	573.383	590.939	582.161	610.679		0	57.254	20617000000	10257000000	10360000000	9.62887	9.34537	9.48746	9.55842	0.738683	0.560308	0.932355	0.578061	-0.0642989	0.0977456	0.014641	0.16633	1.04558	0.934492	0.989903	0.891107
	PDXK	Pyridoxal kinase	1	1	1	1	4	0	0	0	0	YES	607.779	277.328	442.553	1205.29	1115.34	1160.31	247.696	772.467	510.081	338.576	296.17	317.373	607.581		0	150.33	19075000000	10017000000	9058100000	9.22102	9.75295	9.49817	9.26741	0.585913	0.0748847	0.918756	0.70041	-0.0989072	-0.336482	0.0186342	-0.117756	1.07096	1.26267	0.987167	1.08505
	COPB1	Coatomer subunit beta	1	1	1	1	4	0	0	0	0	YES	555.714	717.349	636.532	861.829	801.114	831.471	499.362	521.042	510.202	501.654	399.749	450.701	607.227		0	203.65	18773000000	10517000000	8256200000	9.48083	9.592	9.45086	9.36929	0.0806152	0.0203506	0.0379631	0.0539244	-0.29596	-0.435846	-0.528136	-0.582361	1.2277	1.3527	1.44207	1.4973		+
	RPL7	60S ribosomal protein L7	1	1	1	1	4	0	0	0	0	YES	799.711	633.876	716.793	906.344	939.9	923.122	328.265	347.773	338.019	427.512	433.2	430.356	602.073		0	39.795	21329000000	9447000000	11882000000	9.70924	9.59773	9.43864	9.42698	0.953803	0.542606	0.102201	0.93097	0.00115371	-0.120232	0.376068	0.0243196	0.999201	1.08691	0.770535	0.983284
	DHX9	ATP-dependent RNA helicase A	1	1	1	1	4	0	0	0	0	YES	644.887	778.757	711.822	715.965	629	672.482	509.953	563.298	536.626	466.534	487.084	476.809	599.435		0	219.16	18464000000	8966700000	9497000000	9.54197	9.54721	9.53046	9.51123	0.576474	0.939278	0.906942	0.571403	-0.101165	-0.0219655	-0.0346184	0.169284	1.07264	1.01534	1.02429	0.889284
	RPS9	40S ribosomal protein S9	1	1	1	1	4	0	0	0	0	YES	936.379	666.389	801.384	633.412	576.022	604.717	444.836	437.943	441.39	545.605	505.275	525.44	593.233		0	31.325	18647000000	8092700000	10554000000	9.62412	9.56624	9.57514	9.57285	0.885197	0.421573	0.0007113	0.138468	-0.033289	0.137897	0.784504	0.44615	1.02334	0.908843	0.580552	0.733999
	RPS3	40S ribosomal protein S3	1	1	1	1	4	0	0	0	0	YES	741.39	1009.23	875.312	696.578	588.046	642.312	434.663	332.446	383.554	536.027	397.191	466.609	591.947		0	82.745	19447000000	9010100000	10437000000	9.63782	9.55025	9.50225	9.59289	0.0727015	1	0.02499	0.310066	-0.303757	-0.00791317	0.517729	0.305095	1.23435	1.0055	0.69847	0.809389
	GOT1	Aspartate aminotransferase, cytoplasmic	1	1	1	1	4	0	0	0	0	YES	549.697	554.988	552.342	582.726	743.342	663.034	537.479	613.616	575.547	587.236	561.099	574.168	591.273		0	158.45	19383000000	9648000000	9735300000	9.47542	9.50888	9.53055	9.60729	0.659537	0.494274	0.889088	0.70947	-0.0818275	-0.134002	-0.040304	-0.114082	1.05836	1.09733	1.02833	1.08229
	RPS10;RPS10P5	40S ribosomal protein S10;Putative 40S ribosomal protein S10-like	1	1	1	1	4	0	0	0	0	YES	272.843	683.144	477.993	1048.49	759.325	903.905	384.12	401.841	392.98	656.967	496.595	576.781	587.915		0	16.011	21516000000	9055600000	12460000000	9.40245	9.77155	9.48143	9.64639	0.464621	0.0387049	0.0778967	0.0184566	0.126444	0.367147	0.406101	0.710702	0.916087	0.775314	0.75466	0.611023		+
	GLO1	Lactoylglutathione lyase	1	1	1	1	4	0	0	0	0	YES	610.214	564.71	587.462	612.398	722.213	667.305	510.034	537.044	523.539	563.698	572.915	568.306	586.653		0	46.693	20444000000	9269400000	11174000000	9.49528	9.56754	9.55569	9.54342	0.255387	0.137942	0.262821	0.631576	0.20201	0.26123	0.256045	0.143132	0.869338	0.834376	0.837381	0.905551
	RPL18	60S ribosomal protein L18	1	1	1	1	4	0	0	0	0	YES	576.234	706.222	641.228	795.823	845.617	820.72	432.512	397.717	415.114	472.458	452.151	462.305	584.842		0	49.534	18440000000	8745700000	9694400000	9.50057	9.63219	9.45817	9.44059	0.671577	0.794796	0.173835	0.479399	-0.0791122	-0.0558912	0.312084	0.212009	1.05637	1.0395	0.805477	0.863334
	GCN1L1	Translational activator GCN1	1	1	1	1	4	0	0	0	0	YES	761.6	738.826	750.213	613.81	576.953	595.382	641.912	546.753	594.333	397.767	391.417	394.592	583.63		0	291.46	19872000000	9983600000	9888500000	9.62795	9.60981	9.53409	9.38032	0.430679	0.317311	0.893181	0.923657	-0.138775	-0.192381	-0.038999	-0.0307372	1.10097	1.14265	1.0274	1.02153
	SYNCRIP	Heterogeneous nuclear ribonucleoprotein Q	1	1	1	1	4	0	0	0	0	YES	774.089	379.528	576.808	264.067	855.734	559.901	544.65	724.642	634.646	501.795	604.767	553.281	581.159		0	126.07	22979000000	10746000000	12233000000	9.55864	9.62691	9.60904	9.5483	0.772441	0.744708	0.523143	0.453308	0.0441843	0.0511633	0.143785	0.224905	0.969838	0.965158	0.905141	0.855652
	CAND1	Cullin-associated NEDD8-dissociated protein 1	1	1	1	1	4	0	0	0	0	YES	637.301	744.234	690.768	521.196	539.145	530.17	501.777	499.902	500.84	636.555	536.675	586.615	577.098		0	115.43	20027000000	10045000000	9982000000	9.55374	9.50304	9.48718	9.53337	0.939911	0.666377	0.741417	0.757933	-0.0219802	-0.0874421	-0.0883161	-0.0946954	1.01535	1.06248	1.06313	1.06784
	NPEPPS	Puromycin-sensitive aminopeptidase	1	1	1	1	4	0	0	0	0	YES	524.369	628.648	576.509	674.558	414.135	544.347	510.869	550.65	530.759	557.711	736.007	646.859	574.618		0	193.29	19719000000	9148200000	10571000000	9.46016	9.63295	9.4961	9.63535	0.589204	0.662734	0.877385	0.762294	0.0908535	0.0712136	0.0308304	-0.0929709	0.938967	0.951837	0.978857	1.06656
	FKBP4	Peptidyl-prolyl cis-trans isomerase FKBP4;Peptidyl-prolyl cis-trans isomerase FKBP4, N-terminally processed	1	1	1	1	4	0	0	0	0	YES	630.042	594.844	612.443	499.844	527.07	513.457	719.661	583.375	651.518	562.334	462.003	512.169	572.397		0	171.41	20181000000	8771200000	11409000000	9.52486	9.50961	9.62827	9.58087	0.120345	0.334712	0.651603	0.280018	0.279412	0.167101	0.10017	0.324811	0.823927	0.890631	0.932923	0.798403
	GART	Trifunctional purine biosynthetic protein adenosine-3;Phosphoribosylamine--glycine ligase;Phosphoribosylformylglycinamidine cyclo-ligase;Phosphoribosylglycinamide formyltransferase	1	1	1	1	4	0	0	0	0	YES	421.554	465.071	443.312	714.836	608.017	661.427	752.9	733.215	743.058	462.765	399.772	431.269	569.766		0	242.37	22555000000	10247000000	12308000000	9.4049	9.68344	9.67193	9.44772	0.110486	0.52641	0.328969	0.43347	0.287354	0.107018	0.222557	0.234992	0.819403	0.928505	0.857045	0.84969
	ALDH9A1	4-trimethylaminobutyraldehyde dehydrogenase	1	1	1	1	4	0	0	0	0	YES	586.28	621.578	603.929	489.713	685.306	587.509	678.635	486.661	582.648	464.325	454.567	459.446	558.383		0	98.182	17844000000	8319300000	9525000000	9.47849	9.55251	9.61077	9.41599	0.470719	0.309869	0.938688	0.782488	0.124593	0.176323	0.0127832	0.0816123	0.917263	0.884956	0.991178	0.945001
	HSPB1	Heat shock protein beta-1	1	1	1	1	4	0	0	0	0	YES	538.545	617.468	578.007	482.621	513.404	498.012	618.948	513.16	566.054	637.049	539.138	588.093	557.542		0	61.873	19543000000	8880800000	10663000000	9.48008	9.41382	9.65639	9.63083	0.829658	0.934729	0.339601	0.214219	0.0304067	-0.0230205	0.217603	0.373732	0.979144	1.01608	0.859993	0.771784
	RPL30	60S ribosomal protein L30	1	1	1	1	4	0	0	0	0	YES	762.197	652.3	707.249	737.255	834.546	785.901	346.643	322.038	334.34	308.306	476.242	392.274	554.941		0	54.224	19133000000	9148100000	9985100000	9.57701	9.63717	9.44486	9.38133	0.748978	0.608843	0.119225	0.597148	-0.0620681	-0.10231	0.358284	0.157949	1.04396	1.07349	0.780092	0.896298
	ERP29	Endoplasmic reticulum resident protein 29	1	1	1	1	4	0	0	0	0	YES	529.758	469.649	499.703	637.956	270.533	454.244	595.878	719.714	657.796	591.538	618.261	604.9	554.161		0	73.755	22912000000	10672000000	12240000000	9.4013	9.60579	9.59777	9.5496	0.632227	0.511125	0.785926	0.85752	0.0794293	0.111298	-0.0736058	0.0524158	0.946432	0.925755	1.05234	0.96432
	PGD	6-phosphogluconate dehydrogenase, decarboxylating	1	1	1	1	4	0	0	0	0	YES	740.618	665.566	703.092	436.955	708.495	572.725	396.039	591.266	493.653	304.78	584.263	444.522	553.498		0	176.45	21044000000	9000300000	12044000000	9.58852	9.67003	9.54635	9.51614	0.326369	0.0953571	0.0504643	0.149562	0.173	0.294665	0.451119	0.433921	0.886997	0.815262	0.731475	0.740247
	TXNDC5	Thioredoxin domain-containing protein 5 = ERp46	1	1	1	1	4	0	0	0	0	YES	751.746	692.549	722.147	266.201	591.946	429.073	355.856	569.59	462.723	609.733	587.011	598.372	553.079		0	98.912	20708000000	10471000000	10237000000	9.51487	9.51422	9.46881	9.55677	0.258893	0.485506	0.515271	0.301394	-0.194658	0.118626	-0.169128	-0.313119	1.14445	0.921065	1.12438	1.24239
	FUBP1	Far upstream element-binding protein 1	1	1	1	1	4	0	0	0	0	YES	392.389	391.358	391.873	794.135	740.336	767.235	489.687	644.116	566.902	491.444	441.286	466.365	548.094		0	166.89	21931000000	10030000000	11901000000	9.32251	9.7089	9.53662	9.45283	0.137972	0.275826	0.952889	0.704942	0.266397	0.189793	-0.0200479	0.112633	0.831393	0.876732	1.01399	0.924898
	ACADM	Medium-chain specific acyl-CoA dehydrogenase, mitochondrial	1	1	1	1	4	0	0	0	0	YES	760.04	620.294	690.167	363.113	529.892	446.503	654.358	398.48	526.419	492.729	549.671	521.2	546.072		0	152.93	16768000000	8318200000	8449900000	9.50546	9.48748	9.5068	9.50726	0.225897	0.95255	0.9212	0.863136	-0.208094	0.00288247	-0.0300888	-0.0537932	1.15516	0.998004	1.02108	1.03799
	IL18	Interleukin-18	1	1	1	1	4	0	0	0	0	YES	521.321	432.747	477.034	785.309	749.207	767.258	567.809	391.677	479.743	388.286	508.047	448.166	543.05		0	98.474	19988000000	9483500000	10505000000	9.36923	9.61291	9.48663	9.44759	0.74164	0.797305	0.80182	0.664338	0.0517201	-0.0552914	0.0533895	0.129349	0.964785	1.03907	0.96367	0.914244
	GSTO1	Glutathione S-transferase omega-1	1	1	1	1	4	0	0	0	0	YES	442.496	496.995	469.745	692.725	671.772	682.248	480.636	437.472	459.054	524.425	566.231	545.328	539.094		0	41.782	17326000000	8184800000	9141100000	9.39784	9.56824	9.46322	9.48739	0.44537	0.874383	0.848445	0.47328	0.132379	0.0207689	0.0394191	-0.21786	0.912326	0.985707	0.973047	1.16301
	EIF2S1	Eukaryotic translation initiation factor 2 subunit 1	1	1	1	1	4	0	0	0	0	YES	467.489	552.548	510.019	443.348	830.587	636.967	664.455	434.444	549.45	494.547	424.893	459.72	539.039		0	64.634	21172000000	10105000000	11067000000	9.44517	9.60921	9.55518	9.44551	0.519498	0.755194	0.606377	0.876752	0.110229	0.0486547	0.115033	0.0450235	0.926441	0.966838	0.923361	0.969274
	GSTM3	Glutathione S-transferase Mu 3	1	1	1	1	4	0	0	0	0	YES	532.902	663.685	598.293	616.374	463.645	540.009	422.974	585.543	504.258	417.059	579.123	498.091	535.163		0	127.33	19552000000	10209000000	9342900000	9.51024	9.59388	9.48789	9.47366	0.475401	0.322874	0.844411	0.433755	-0.126596	-0.190273	-0.0546171	-0.237626	1.09172	1.14098	1.03858	1.17905
	CBR1	Carbonyl reductase [NADPH] 1	1	1	1	1	4	0	0	0	0	YES	601.284	574.598	587.941	554.912	554.284	554.598	490.311	584.593	537.452	374.636	510.882	442.759	530.688		0	192.61	17205000000	7722100000	9483300000	9.46165	9.56532	9.52578	9.46409	0.948253	0.825439	0.579604	0.568811	0.00245056	0.0321009	0.124063	0.170438	0.998303	0.977995	0.9176	0.888573
	RPL18A	60S ribosomal protein L18a	1	1	1	1	4	0	0	0	0	YES	506.253	379.86	443.056	790.758	898.917	844.837	308.08	406.988	357.534	410.798	543.28	477.039	530.617		0	56.12	21090000000	10062000000	11029000000	9.3517	9.71764	9.39517	9.46406	0.552729	0.561439	0.0996296	0.655504	0.100843	-0.115035	0.378956	0.133037	0.932488	1.083	0.768994	0.91191
	RPS25	40S ribosomal protein S25	1	1	1	1	4	0	0	0	0	YES	718.044	727.804	722.924	671.081	603.208	637.144	345.419	384.89	365.155	357.358	381.312	369.335	523.64		0	10.397	18111000000	8816100000	9295300000	9.54153	9.52993	9.36698	9.35491	0.462174	0.986681	0.561525	0.563936	-0.130129	-0.00488457	0.130272	0.172616	1.09439	1.00339	0.913659	0.887233
	RPS14	40S ribosomal protein S14	1	1	1	1	4	0	0	0	0	YES	698.885	710.558	704.722	854	477.289	665.644	413.502	431.53	422.516	366.996	220.001	293.499	521.595		0	58.283	18926000000	9260400000	9665800000	9.51203	9.65487	9.41466	9.36517	0.330682	0.779906	0.869284	0.697102	-0.169047	0.0427844	0.0332292	0.115832	1.12432	0.97078	0.97723	0.92285
	RPL23	60S ribosomal protein L23	1	1	1	1	4	0	0	0	0	YES	466.812	373.258	420.035	928.832	714.676	821.754	415.641	434.176	424.909	391.789	428.876	410.332	519.257		0	84.807	14510000000	7350500000	7159200000	9.31595	9.61229	9.40748	9.3735	0.0732573	0.232628	0.770755	0.947089	-0.303187	-0.228098	0.0628125	-0.0218629	1.23387	1.17129	0.957396	1.01527
	AP2B1	AP-2 complex subunit beta	1	1	1	1	4	0	0	0	0	YES	679.137	585.847	632.492	381.641	420.382	401.011	488.083	514.824	501.453	558.808	519.261	539.034	518.498		0	75.324	16574000000	7636800000	8937000000	9.51227	9.3061	9.5219	9.52629	0.787548	0.453234	0.761273	0.641145	-0.0537932	0.128161	0.0657101	0.139076	1.03799	0.914997	0.955475	0.9081
	ACADVL	Very long-chain specific acyl-CoA dehydrogenase, mitochondrial	1	1	1	1	4	0	0	0	0	YES	487.651	492.122	489.887	544.274	423.886	484.08	669.997	490.371	580.184	484.752	550.115	517.434	517.896		0	145.76	14431000000	8083900000	6347100000	9.35715	9.35968	9.45174	9.40435	0.0529762	0.148287	0.00820671	0.0590815	-0.326769	-0.274582	-0.671324	-0.570357	1.2542	1.20964	1.59253	1.48489
	HNRNPA0	Heterogeneous nuclear ribonucleoprotein A0	1	1	1	1	4	0	0	0	0	YES	508.489	205.714	357.102	943.491	61.7907	502.641	1070.99	62.8131	566.901	382.221	865.989	624.105	512.687		0	130.78	16790000000	7069300000	9720900000	9.3371	9.46725	9.56895	9.63502	0.326708	0.456308	0.558863	0.165303	0.172872	0.127237	0.131194	0.417704	0.887075	0.915583	0.913075	0.748615
	RANBP1	Ran-specific GTPase-activating protein	1	1	1	1	4	0	0	0	0	YES	342.052	333.183	337.618	394.527	356.099	375.313	649.124	741.512	695.318	608.871	550.162	579.517	496.941		0	95.029	14793000000	6731000000	8062300000	9.2443	9.35864	9.64381	9.55546	0.245676	0.635037	0.766233	0.731427	0.206393	0.0781998	0.0641931	0.101919	0.866701	0.947239	0.95648	0.931793
	RPS26;RPS26P11	40S ribosomal protein S26;Putative 40S ribosomal protein S26-like 1	1	1	1	1	4	0	0	0	0	YES	422.963	623.194	523.078	336.097	233.113	284.605	555.047	590.836	572.941	602.281	602.977	602.629	495.813		0	40.335	14068000000	6921700000	7145900000	9.41662	9.24368	9.52163	9.49541	0.904751	0.919188	0.596846	0.750281	0.0126402	0.0104934	0.118227	0.0943712	0.991277	0.992753	0.921319	0.93668
	PSAT1	Phosphoserine aminotransferase	1	1	1	1	4	0	0	0	0	YES	335.27	320.598	327.934	514.081	457.31	485.696	652.997	702.731	677.864	421.416	519.989	470.702	490.549		0	84.076	18036000000	8158500000	9877500000	9.36084	9.47515	9.66496	9.48918	0.0109634	0.471884	0.758461	0.788774	0.463727	0.122606	-0.0826522	-0.0825606	0.725111	0.918527	1.05896	1.0589	+
	TPD52L2	Tumor protein D54	1	1	1	1	4	0	0	0	0	YES	390.71	410.364	400.537	594.952	498.534	546.743	461.989	546.35	504.17	509.783	499.708	504.745	489.049		0	170.4	16719000000	8157500000	8561900000	9.32238	9.56462	9.48616	9.48664	0.412479	0.422408	0.847973	0.459542	0.142871	0.137635	0.0395595	-0.224621	0.905715	0.909008	0.972952	1.16847
	PSMB1	Proteasome subunit beta type-1	1	1	1	1	4	0	0	0	0	YES	463.851	619.825	541.838	591.284	378.929	485.107	380.887	406.907	393.897	619.363	446.663	533.013	488.464		0	176.11	14260000000	6894100000	7366100000	9.46109	9.50424	9.40315	9.49222	0.657554	0.833933	0.610776	0.623923	0.0728604	0.0301242	0.113567	0.146395	0.950751	0.979336	0.9243	0.903506
	UGP2	UTP--glucose-1-phosphate uridylyltransferase	1	1	1	1	4	0	0	0	0	YES	420.312	663.579	541.945	574.783	549.138	561.96	391.899	539.512	465.705	459.811	294.214	377.013	486.656		0	150.45	15162000000	7433900000	7728600000	9.41547	9.46614	9.51484	9.43412	0.464229	0.546952	0.449321	0.476102	-0.129576	-0.119025	-0.195814	-0.216485	1.09397	1.086	1.14537	1.1619
	RPL26;KRBA2	60S ribosomal protein L26	1	1	1	1	4	0	0	0	0	YES	474.43	508.439	491.435	509.959	1042.39	776.177	284.111	323.775	303.943	351.301	382.247	366.774	484.582		0	20.195	14740000000	7673800000	7066200000	9.38373	9.694	9.2891	9.29332	0.912676	0.0749654	0.674826	0.208008	0.0107799	-0.336391	-0.110885	-0.381066	0.992556	1.26259	1.07989	1.3023
	RPS18	40S ribosomal protein S18	1	1	1	1	4	0	0	0	0	YES	418.736	434.885	426.81	669.623	659.14	664.381	437.527	331.983	384.755	471.769	452.151	461.96	484.477		0	62.158	17359000000	7140700000	10219000000	9.32537	9.56962	9.52102	9.53457	0.845127	0.395428	0.00045537	0.0482949	-0.0416399	0.146264	0.812621	0.595313	1.02928	0.903587	0.569346	0.661901
	HSPH1	Heat shock protein 105 kDa	1	1	1	1	4	0	0	0	0	YES	483.361	263.194	373.277	279.233	395.748	337.49	510.877	449.893	480.385	780.631	700.496	740.564	482.929		0	149.9	14923000000	7049100000	7874100000	9.32889	9.38232	9.47248	9.57982	0.0771382	0.0332263	0.588206	0.129355	0.319271	0.378401	-0.141605	-0.458644	0.801475	0.76929	1.10313	1.37425		+
	RPL13A;RPL13a	60S ribosomal protein L13a	1	1	1	1	4	0	0	0	0	YES	591.398	499.797	545.598	707.576	505.127	606.351	462.274	319.627	390.95	440.527	336.417	388.472	482.843		0	36.061	17471000000	8166100000	9304800000	9.46255	9.49755	9.51264	9.44784	0.991934	0.585955	0.106998	0.763902	-0.0112826	-0.108394	0.370834	0.0889556	1.00785	1.07803	0.773335	0.940203
	SRSF3	Serine/arginine-rich splicing factor 3	1	1	1	1	4	0	0	0	0	YES	401.185	405.423	403.304	536.668	518.419	527.544	471.479	517.211	494.345	458.158	540.342	499.25	481.111		0	52.312	18085000000	8398000000	9686900000	9.37308	9.54337	9.48128	9.47053	0.0471383	0.564319	0.521324	0.482991	0.359746	0.0966667	0.144438	0.210264	0.779302	0.935191	0.904732	0.864379	+
	DARS	Aspartate--tRNA ligase, cytoplasmic	1	1	1	1	4	0	0	0	0	YES	394.721	354.501	374.611	464.508	432.801	448.655	482.775	530.614	506.695	639.532	535.448	587.49	479.363		0	104.1	18959000000	8545200000	10414000000	9.32866	9.51854	9.53711	9.54782	0.40571	0.953182	0.95286	0.943302	0.145091	0.00273846	0.00863036	0.0196308	0.904323	0.998104	0.994036	0.986485
	CS	Citrate synthase;Citrate synthase, mitochondrial	1	1	1	1	4	0	0	0	0	YES	657.782	660.293	659.037	588.582	507.407	547.994	372.759	396.718	384.739	308.424	333.835	321.13	478.225		0	78.575	15647000000	7454100000	8192600000	9.52073	9.50938	9.41348	9.34082	0.0674985	0.692161	0.152484	0.3714	-0.30927	0.0639171	0.328607	0.268434	1.23908	0.956663	0.796305	0.83022
	NQO1	NAD(P)H dehydrogenase [quinone] 1	1	1	1	1	4	0	0	0	0	YES	502.026	449.26	475.643	807.336	863.799	835.567	287.839	382.625	335.232	241.068	290.191	265.629	478.018		0	74.063	18680000000	7986200000	10693000000	9.3867	9.65652	9.46708	9.35174	0.432009	0.767508	0.0155044	0.0167282	0.136585	0.0457225	0.559443	0.721679	0.90967	0.968805	0.678564	0.606391
	COPA	Coatomer subunit alpha;Xenin;Proxenin	1	1	1	1	4	0	0	0	0	YES	600.058	573.632	586.845	337.256	544.123	440.689	390.797	427.828	409.312	471.933	466.731	469.332	476.545		0	192.25	14969000000	7840200000	7128500000	9.44606	9.42336	9.40364	9.46844	0.269305	0.0893289	0.857894	0.46978	-0.190668	-0.321315	0.0366088	-0.219572	1.14129	1.24947	0.974944	1.16439
	CAPZB	F-actin-capping protein subunit beta	1	1	1	1	4	0	0	0	0	YES	554.887	465.826	510.356	535.172	354.207	444.69	466.253	430.629	448.441	407.061	588.033	497.547	475.258		0	51.137	15403000000	7638300000	7765000000	9.40362	9.39832	9.44789	9.44565	0.94025	0.303771	0.836827	0.90416	0.00432164	-0.197617	-0.0570614	-0.0381397	0.997009	1.1468	1.04034	1.02679
	DDX1	ATP-dependent RNA helicase DDX1	1	1	1	1	4	0	0	0	0	YES	450.973	410.674	430.823	689.785	424.253	557.019	560.411	391.563	475.987	417.702	430.333	424.018	471.962		0	187.92	16326000000	7684900000	8641500000	9.34339	9.58833	9.41765	9.38514	0.761399	0.971014	0.760353	0.721875	-0.0593897	-0.0146161	-0.0820261	-0.109079	1.04202	1.01018	1.0585	1.07854
	COTL1	Coactosin-like protein	1	1	1	1	4	0	0	0	0	YES	468.142	474.778	471.46	678.204	372.155	525.179	460.856	516.918	488.887	360.963	443.187	402.075	471.9		0	78.806	13772000000	6742600000	7029100000	9.3469	9.41682	9.5341	9.44235	0.577699	0.388304	0.830134	0.816168	-0.100871	-0.167053	0.0448837	-0.0718912	1.07242	1.12276	0.969368	1.05109
	CTPS1	CTP synthase 1	1	1	1	1	4	0	0	0	0	YES	365.876	530.996	448.436	689.225	580.011	634.618	365.58	361.696	363.638	393.857	475.015	434.436	470.282		0	84.282	16646000000	8197000000	8448700000	9.41747	9.52327	9.40691	9.41365	0.841525	0.300828	0.0272603	0.587995	0.0275787	-0.198775	0.509848	0.161952	0.981065	1.14772	0.702297	0.893815
	TFRC	Transferrin receptor protein 1;Transferrin receptor protein 1, serum form	1	1	1	1	4	0	0	0	0	YES	756.593	716.934	736.764	229.875	581.191	405.533	505.95	425.441	465.696	324.252	218.148	271.2	469.798		0	127.98	18564000000	8511100000	10053000000	9.572	9.48913	9.51032	9.37018	0.70587	0.90543	0.406056	0.00684681	0.0606008	0.013641	0.188654	0.815903	0.958865	0.990589	0.877424	0.568053
	SUB1	Activated RNA polymerase II transcriptional coactivator p15	1	1	1	1	4	0	0	0	0	YES	500.968	494.449	497.708	478.814	494.122	486.468	427.18	419.49	423.335	448.128	485.785	466.957	468.617		0	32.104	18740000000	8042600000	10698000000	9.5087	9.55033	9.43225	9.42159	3.23533e-05	0.283587	0.246673	0.910197	0.763752	0.186627	0.265077	-0.0358454	0.588963	0.878657	0.832154	1.02516	+
	ACTR3	Actin-related protein 3	1	1	1	1	4	0	0	0	0	YES	432.745	448.21	440.478	373.16	376.605	374.882	373.513	616.352	494.932	475.616	641.679	558.647	467.235		0	159.08	12207000000	6317900000	5889000000	9.23646	9.3098	9.33638	9.40569	0.41964	0.96654	0.721776	0.473521	-0.141892	-0.0156513	-0.0948956	-0.217742	1.10335	1.01091	1.06799	1.16291
	RPL27	60S ribosomal protein L27	1	1	1	1	4	0	0	0	0	YES	467.871	501.52	484.695	625.123	619.813	622.468	456.116	366.193	411.155	335.105	349.555	342.33	465.162		0	41.179	15595000000	8187000000	7408300000	9.3566	9.47813	9.36511	9.2546	0.723159	0.485258	0.684825	0.652389	-0.0676818	-0.136648	-0.107446	-0.137537	1.04803	1.09935	1.07732	1.10003
	PTMA	Prothymosin alpha;Prothymosin alpha, N-terminally processed;Thymosin alpha-1	1	1	1	1	4	0	0	0	0	YES	317.791	280.863	299.327	266.584	295.291	280.938	737.205	682.565	709.885	498.935	629.594	564.265	463.604		0	88.973	14114000000	6661800000	7452100000	9.21235	9.15546	9.59282	9.53354	0.141957	0.820036	0.462012	0.549478	0.263635	-0.0507714	-0.19052	0.179129	0.832986	1.03582	1.14117	0.883236
	PNP	Purine nucleoside phosphorylase	1	1	1	1	4	0	0	0	0	YES	351.086	343.57	347.328	430.247	228.516	329.381	514.118	423.225	468.671	784.439	624.929	704.684	462.516		0	163.44	14258000000	6485700000	7772300000	9.3153	9.25426	9.53599	9.54711	0.203255	0.282648	0.509777	0.220133	0.227125	0.187007	0.148609	-0.371161	0.854336	0.878426	0.90212	1.29339
	EEF1A2	Elongation factor 1-alpha 2	1	1	1	1	4	0	0	0	0	YES	710.276	823.628	766.952	340.564	292.322	316.443	395.934	572.797	484.365	229.126	312.12	270.623	459.596		0	181.92	13898000000	7805800000	6092200000	9.46907	9.20355	9.48868	9.26802	0.00322932	0.147545	0.668915	0.898733	-0.492281	-0.27507	-0.112927	0.0366088	1.40667	1.21005	1.08142	0.974944	+
	LIMA1	LIM domain and actin-binding protein 1	1	1	1	1	4	0	0	0	0	YES	735.206	606.915	671.06	458.675	269.125	363.9	344.155	390.24	367.198	390.159	476.907	433.533	458.923		0.00037538	1.372	140590000	76276000	64312000	7.3618	7.3129	7.48239	7.10496	0.55516	0.690638	0.67589	1	-0.270713	-0.11182	-0.186246	NaN	1.2064	1.08059	1.1378	NaN
	ST13;ST13P5;ST13P4	Hsc70-interacting protein;Putative protein FAM10A5;Putative protein FAM10A4	1	1	1	1	4	0	0	0	0	YES	509.047	534.252	521.649	366.337	328.518	347.427	518.275	426.164	472.219	516.19	472.441	494.315	458.903		0	45.829	15507000000	6732600000	8774200000	9.47371	9.35031	9.51599	9.53994	0.166519	0.745288	0.174625	0.208047	0.247806	0.051024	0.311503	0.378844	0.842176	0.965251	0.805802	0.769053
	NUDT5	ADP-sugar pyrophosphatase	1	1	1	1	4	0	0	0	0	YES	457.492	454.744	456.118	579.042	515.009	547.026	376.47	381.805	379.138	431.218	465.606	448.412	457.674		0	30.631	16301000000	7574100000	8727200000	9.38005	9.49918	9.36186	9.41737	0.339438	0.783463	0.896069	0.732096	0.168128	0.0419438	0.0253123	0.10165	0.889996	0.971345	0.982608	0.931966
	SEC31A	Protein transport protein Sec31A	1	1	1	1	4	0	0	0	0	YES	413.849	349.712	381.78	487.449	508.448	497.948	382.572	515.863	449.218	498.387	492.255	495.321	456.067		0	158.04	14035000000	7042400000	6992300000	9.26778	9.42737	9.42609	9.45498	0.631591	0.215038	0.327597	0.158934	-0.0882088	-0.236622	-0.251865	-0.426121	1.06305	1.17823	1.19075	1.34362
	GLRX3	Glutaredoxin-3	1	1	1	1	4	0	0	0	0	YES	606.824	634.322	620.573	441.782	265.115	353.448	502.417	358.27	430.344	462.875	339.925	401.4	451.441		0	240.14	13436000000	6766000000	6669800000	9.49493	9.44702	9.39573	9.34337	0.951953	0.958848	0.720174	0.787343	0.00158601	-0.0174316	-0.095435	0.0797024	0.998901	1.01216	1.06839	0.946253
	DHX15	Putative pre-mRNA-splicing factor ATP-dependent RNA helicase DHX15	1	1	1	1	4	0	0	0	0	YES	489.975	356.609	423.292	421.973	308.415	365.194	445.614	655.855	550.735	425.052	496.08	460.566	449.947		0	74.746	17002000000	7610900000	9391200000	9.3742	9.35593	9.57828	9.52373	0.335962	0.642578	0.185166	0.109416	0.169412	0.0762854	0.303927	0.482229	0.889205	0.948497	0.810045	0.715871
	TRAP1	Heat shock protein 75 kDa, mitochondrial	1	1	1	1	4	0	0	0	0	YES	394.602	418.213	406.407	431.666	405.411	418.539	498.455	648.273	573.364	407.97	394.68	401.325	449.909		0	181.18	17719000000	8374000000	9345200000	9.31863	9.48525	9.56794	9.42308	0.754137	0.535131	0.943775	0.3869	-0.060954	0.104605	-0.0229326	0.259785	1.04316	0.93006	1.01602	0.835213
	SHMT2	Serine hydroxymethyltransferase, mitochondrial;Serine hydroxymethyltransferase	1	1	1	1	4	0	0	0	0	YES	455.741	301.32	378.53	388.065	363.746	375.905	455.646	620.825	538.235	428.938	581.713	505.326	449.499		0	90.583	15779000000	7166100000	8613000000	9.30047	9.35367	9.49929	9.4837	0.316316	0.126064	0.593218	0.75062	0.176833	0.269632	-0.139776	0.0942361	0.884643	0.829531	1.10173	0.936768
	RPL10;RPL10L	60S ribosomal protein L10;60S ribosomal protein L10-like	1	1	1	1	4	0	0	0	0	YES	420.415	363.762	392.089	546.968	328.005	437.486	554.066	371.6	462.833	602.955	406.71	504.832	449.31		0	168.21	18582000000	9119800000	9462600000	9.27312	9.35982	9.50584	9.50084	0.848177	0.235796	0.581938	0.907584	-0.0410015	-0.226611	0.123269	0.0332292	1.02883	1.17008	0.918105	0.97723
	LMNB1	Lamin-B1	1	1	1	1	4	0	0	0	0	YES	333.925	356.775	345.35	493.642	620.268	556.955	398.9	493.911	446.405	435.544	450.615	443.079	447.947		0	131.91	21483000000	8065900000	13417000000	9.50652	9.61727	9.53373	9.55129	0.00616779	0.00365859	0.0185658	0.029104	0.499986	0.519341	0.543991	0.658006	0.707114	0.697691	0.685871	0.633754	+	+
	PFKP	ATP-dependent 6-phosphofructokinase, platelet type	1	1	1	1	4	0	0	0	0	YES	276.862	449.132	362.997	646.391	516.71	581.55	630.057	230.211	430.134	637.558	193.725	415.641	447.581		0	267.84	17097000000	7585000000	9512100000	9.29623	9.5282	9.60713	9.43632	0.83499	0.746451	0.105343	0.0993407	0.0291349	0.0507454	0.372618	0.496513	0.980008	0.965437	0.77238	0.708818
	ARCN1	Coatomer subunit delta	1	1	1	1	4	0	0	0	0	YES	250.149	379.671	314.91	454.515	547.048	500.782	443.742	430.442	437.092	543.137	525.271	534.204	446.747		0	65.708	14018000000	7534300000	6483500000	9.20137	9.44786	9.41241	9.45048	0.0578574	0.0139114	0.108851	0.0529575	-0.320486	-0.461621	-0.409221	-0.584717	1.24875	1.37709	1.32797	1.49975		+
	LTA4H	Leukotriene A-4 hydrolase	1	1	1	1	4	0	0	0	0	YES	261.962	569.628	415.795	567.284	567.884	567.584	466.423	405.34	435.882	304.24	421.78	363.01	445.568		0	179.08	17490000000	8231500000	9259000000	9.32529	9.54389	9.49217	9.36803	0.507017	0.883043	0.726311	0.926498	0.113834	0.0187766	-0.093371	0.026021	0.924129	0.987069	1.06686	0.982125
	YARS	Tyrosine--tRNA ligase, cytoplasmic;Tyrosine--tRNA ligase, cytoplasmic, N-terminally processed	1	1	1	1	4	0	0	0	0	YES	304.005	320.447	312.226	685.073	548.192	616.632	515.414	335.587	425.501	509.725	332.885	421.305	443.916		0	157.35	17729000000	8605800000	9123200000	9.25042	9.54809	9.46282	9.40083	0.0715048	0.704173	0.762799	0.824576	0.325732	-0.0779545	-0.0812169	-0.0686346	0.797894	1.05552	1.05791	1.04872
	IMPDH2	Inosine-5-monophosphate dehydrogenase 2	1	1	1	1	4	0	0	0	0	YES	417.653	493.762	455.707	706.847	703.664	705.255	290.294	302.189	296.241	325.177	245.217	285.197	435.6		0	137.01	17325000000	7586700000	9738100000	9.42557	9.66556	9.37332	9.37273	0.0338708	0.253224	0.35575	0.0398864	0.385155	0.199374	0.210264	0.619554	0.765697	0.870928	0.864379	0.650872	+
	HNRNPF	Heterogeneous nuclear ribonucleoprotein F;Heterogeneous nuclear ribonucleoprotein F, N-terminally processed	1	1	1	1	4	0	0	0	0	YES	351.787	349.976	350.881	319.035	323.767	321.401	522.359	631.776	577.068	427.363	551.889	489.626	434.744		0	72.916	13245000000	5991300000	7253700000	9.29486	9.24792	9.63455	9.51603	0.443685	0.809927	0.966976	0.956818	0.132906	-0.0522815	-0.0155929	0.0144981	0.911993	1.0369	1.01087	0.990001
	PRDX4	Peroxiredoxin-4	1	1	1	1	4	0	0	0	0	YES	347.146	270.673	308.909	472.904	451.724	462.314	542.139	478.73	510.434	419.614	486.435	453.024	433.67		0	68.556	13921000000	7264300000	6656700000	9.29431	9.38814	9.42274	9.36299	0.581122	0.540354	0.0337327	0.102868	-0.100051	-0.120859	-0.540233	-0.493114	1.07181	1.08738	1.45421	1.40748
	FH	Fumarate hydratase, mitochondrial	1	1	1	1	4	0	0	0	0	YES	310.237	435.24	372.738	334.969	381.136	358.052	581.309	514.572	547.941	513.228	393.358	453.293	433.006		0	295.94	14944000000	7101700000	7842000000	9.41828	9.27976	9.52815	9.4747	0.720671	0.424878	0.609252	0.845277	-0.0682262	-0.155116	-0.13397	0.0571383	1.04843	1.11351	1.09731	0.961169
	ETFA	Electron transfer flavoprotein subunit alpha, mitochondrial	1	1	1	1	4	0	0	0	0	YES	557.394	343.646	450.52	701.543	712.322	706.933	280.635	328.224	304.43	276.156	261.428	268.792	432.669		0	176.14	19706000000	9758500000	9947900000	9.39076	9.60433	9.21917	9.19609	0.416289	0.405247	0.439	0.83365	-0.142847	-0.161443	-0.200183	-0.0651287	1.10408	1.11841	1.14884	1.04618
	RPS15	40S ribosomal protein S15	1	1	1	1	4	0	0	0	0	YES	384.621	551.694	468.157	506.974	370.483	438.729	498.495	267.158	382.827	502.743	315.359	409.051	424.691		0	74.381	15272000000	7906200000	7365800000	9.32238	9.5271	9.41337	9.37892	0.341959	0.454052	0.809207	0.993146	-0.16537	-0.14602	0.0511633	0.000721115	1.12145	1.10651	0.965158	0.9995
	PSMC2	26S protease regulatory subunit 7	1	1	1	1	4	0	0	0	0	YES	366.791	323.725	345.258	419.463	387.705	403.584	451.829	427.698	439.764	536.758	459.216	497.987	421.648		0	156.26	14258000000	6834100000	7423900000	9.25054	9.35455	9.40257	9.45347	0.950103	0.805591	0.733927	0.989343	0.00201835	-0.053314	-0.0908183	0.00216244	0.998602	1.03765	1.06497	0.998502
	RPL31	60S ribosomal protein L31	1	1	1	1	4	0	0	0	0	YES	281.59	242.768	262.179	468.223	382.052	425.138	450.087	586.598	518.343	439.979	509.037	474.508	420.042		0	17.641	14956000000	7415500000	7540000000	9.19783	9.34189	9.46455	9.42975	0.850465	0.209762	0.621604	0.488115	0.0254541	-0.239277	-0.129545	-0.21068	0.982511	1.1804	1.09395	1.15723
	FKBP10	Peptidyl-prolyl cis-trans isomerase FKBP10	1	1	1	1	4	0	0	0	0	YES	867.448	371.875	619.662	461.73	210.246	335.988	349.195	346.588	347.892	427.426	323.865	375.645	419.797		0	99.063	15152000000	8168800000	6983600000	9.50255	9.33872	9.34266	9.32416	0.030616	0.35592	0.361693	0.240673	-0.363958	-0.178208	-0.235025	-0.355239	1.28695	1.13148	1.17693	1.2792	+
	SRM	Spermidine synthase	1	1	1	1	4	0	0	0	0	YES	376.39	441.29	408.84	665.279	612.614	638.946	258.757	335.279	297.018	304.686	355.883	330.285	418.772		0	109.77	13300000000	6946500000	6353900000	9.29568	9.50764	9.19907	9.22994	0.719981	0.476154	0.365284	0.456455	-0.0683774	-0.139347	-0.233312	-0.226156	1.04854	1.10141	1.17553	1.16971
	TPT1	Translationally-controlled tumor protein	1	1	1	1	4	0	0	0	0	YES	224.925	539.797	382.361	315.037	357.69	336.363	426.248	479.314	452.781	429.784	500.175	464.98	409.121		0	93.768	11855000000	6666200000	5188800000	9.23012	9.21104	9.36988	9.33185	0.0179801	0.0331527	0.0478273	0.0657959	-0.397391	-0.400873	-0.503855	-0.555969	1.31712	1.32031	1.418	1.47016	+	+
	GFPT1	Glutamine--fructose-6-phosphate aminotransferase [isomerizing] 1	1	1	1	1	4	0	0	0	0	YES	272.811	336.537	304.674	410.821	553.339	482.08	489.784	463.686	476.735	270.107	456.974	363.541	406.757		0	161.53	15484000000	8590000000	6894400000	9.23009	9.45196	9.43008	9.34019	0.642135	0.000592851	0.0122235	0.0123177	-0.0857876	-0.641536	-0.636593	-0.755673	1.06127	1.55999	1.55465	1.68842		+
	PSMD2	26S proteasome non-ATPase regulatory subunit 2	1	1	1	1	4	0	0	0	0	YES	279.521	365.439	322.48	403.453	453.219	428.336	349.528	427.251	388.39	488.122	460.989	474.556	403.44		0	169.59	14551000000	7398100000	7153300000	9.22935	9.41441	9.39491	9.42075	0.910236	0.875534	0.595532	0.397646	0.0113525	-0.036807	-0.138934	-0.256614	0.992162	1.02584	1.10109	1.19467
	DDT;DDTL	D-dopachrome decarboxylase;D-dopachrome decarboxylase-like protein	1	1	1	1	4	0	0	0	0	YES	331.052	568.842	449.947	376.429	531.256	453.843	344.163	367.647	355.905	383.263	310.711	346.987	401.67		0	40.361	12831000000	6308000000	6522600000	9.3539	9.40668	9.34508	9.31819	0.101599	0.900898	0.770755	0.703305	-0.277936	-0.0308845	0.0628125	0.1133	1.21246	1.02164	0.957396	0.924471
	VDAC2	Voltage-dependent anion-selective channel protein 2	1	1	1	1	4	0	0	0	0	YES	433.024	491.284	462.154	213.389	379.765	296.577	430.68	507.574	469.127	366.377	333.012	349.694	394.388		0	51.592	12450000000	6302500000	6147400000	9.32599	9.35149	9.38292	9.30378	0.256224	0.740068	0.0472903	0.990484	-0.195699	0.0522768	-0.505062	0.00173014	1.14528	0.964413	1.41918	0.998801
	PFKM	ATP-dependent 6-phosphofructokinase, muscle type	1	1	1	1	4	0	0	0	0	YES	267.844	306.117	286.98	431.321	418.827	425.074	447.948	460.455	454.202	386.703	405.538	396.121	390.594		0	46.299	13230000000	6047400000	7182200000	9.18898	9.41444	9.47116	9.38347	0.936568	0.647993	0.111881	0.281378	-0.0226688	0.0749164	0.365692	0.323889	1.01584	0.949397	0.776096	0.798913
	MTPN	Myotrophin	1	1	1	1	4	0	0	0	0	YES	362.644	381.87	372.257	482.391	536.007	509.199	310.228	366.875	338.551	389.994	283.238	336.616	389.156		0	51.512	14193000000	6985400000	7207600000	9.27265	9.43631	9.28493	9.27733	0.851797	0.957649	0.964392	0.940464	-0.0402447	-0.0177091	-0.0164098	-0.0243698	1.02829	1.01235	1.01144	1.01704
	RPL36	60S ribosomal protein L36	1	1	1	1	4	0	0	0	0	YES	323.625	277.184	300.405	455.359	573.786	514.573	408.745	402.198	405.472	383.412	287.736	335.574	389.006		0	30.363	13383000000	6600200000	6782400000	9.20382	9.46261	9.37024	9.29574	0.873256	0.610606	0.612025	0.914985	0.0200577	-0.101846	-0.132973	-0.0340274	0.986193	1.07315	1.09655	1.02387
	EIF3C;EIF3CL	Eukaryotic translation initiation factor 3 subunit C;Eukaryotic translation initiation factor 3 subunit C-like protein	1	1	1	1	4	0	0	0	0	YES	341.344	340.133	340.738	484.417	416.906	450.662	328.743	272.63	300.686	638.271	280.157	459.214	387.825		0	80.377	13706000000	6774900000	6930800000	9.31603	9.42364	9.27089	9.42279	0.824928	0.606728	0.818272	0.763852	0.0315363	-0.102868	-0.0630625	-0.0923555	0.978378	1.07391	1.04468	1.06611
	ASS1	Argininosuccinate synthase	1	1	1	1	4	0	0	0	0	YES	330.081	293.713	311.897	452.113	397.537	424.825	419.725	354.057	386.891	450.447	365.45	407.948	382.89		0	203.37	16246000000	6873000000	9373100000	9.2026	9.42606	9.53373	9.55373	0.383955	0.51302	0.058445	0.042228	0.152378	0.110764	0.436268	0.6124	0.899766	0.926097	0.739044	0.654108
	PSMC3	26S protease regulatory subunit 6A	1	1	1	1	4	0	0	0	0	YES	569.158	362.138	465.648	511.694	328.965	420.329	495.781	196.845	346.313	265.445	314.797	290.121	380.603		0	157.15	14308000000	7210800000	7097300000	9.41135	9.43835	9.34984	9.23272	0.853926	0.813196	0.77898	0.967301	-0.0397997	-0.0515038	-0.075885	-0.0142227	1.02797	1.03634	1.05401	1.00991
	CAPZA1	F-actin-capping protein subunit alpha-1	1	1	1	1	4	0	0	0	0	YES	358.807	340.276	349.542	237.227	337.411	287.319	413.874	422.835	418.355	468.932	416.926	442.929	374.536		0	125.6	11295000000	5540500000	5754700000	9.22567	9.27976	9.38189	9.40555	0.663385	0.787714	0.307853	0.428692	-0.0809575	-0.0575868	-0.26214	-0.240231	1.05772	1.04072	1.19926	1.18118
	RPL10A	60S ribosomal protein L10a	1	1	1	1	4	0	0	0	0	YES	370.612	402.621	386.616	164.361	354.354	259.357	375.312	393.633	384.473	442.33	463.357	452.843	370.822		0	52.846	13366000000	6713700000	6652300000	9.30942	9.23477	9.36382	9.4005	0.972517	0.314119	0.84703	0.425101	-0.0152721	-0.193602	0.0398403	-0.242089	1.01064	1.14362	0.972763	1.1827
	ACTR2	Actin-related protein 2	1	1	1	1	4	0	0	0	0	YES	262.177	379.528	320.852	373.428	332.286	352.857	401.517	389.103	395.31	376.18	434.578	405.379	368.6		0	81.253	10932000000	5348300000	5583200000	9.17938	9.27432	9.36829	9.36896	0.250689	0.854993	0.709907	0.650262	-0.197881	-0.041625	0.0816123	-0.138426	1.14701	1.02927	0.945001	1.1007
	PSMB2	Proteasome subunit beta type-2	1	1	1	1	4	0	0	0	0	YES	362.087	435.209	398.648	423.316	480.119	451.717	316.475	369.376	342.925	208.957	333.02	270.988	366.07		0	44.088	11543000000	5652100000	5890900000	9.29669	9.41064	9.34846	9.32255	0.584196	0.97473	0.533407	0.961713	0.0922074	-0.0137566	0.140124	0.0126402	0.938086	1.00958	0.907441	0.991277
	OTUB1	Ubiquitin thioesterase OTUB1	1	1	1	1	4	0	0	0	0	YES	373.254	318.755	346.004	282.449	463.308	372.878	386.948	396.572	391.76	357.57	332.14	344.855	363.874		0	23.836	12169000000	6232400000	5937000000	9.22894	9.37601	9.33189	9.27527	0.819278	0.174278	0.353724	0.701874	-0.0470701	-0.258529	-0.238868	-0.117161	1.03316	1.19626	1.18007	1.0846
	EIF4A3	Eukaryotic initiation factor 4A-III;Eukaryotic initiation factor 4A-III, N-terminally processed	1	1	1	1	4	0	0	0	0	YES	417.964	336.839	377.402	457.431	250.356	353.894	382.102	434.477	408.289	340.198	288.988	314.593	363.544		0	78.633	11552000000	5498400000	6053900000	9.26224	9.25852	9.42238	9.30281	0.624421	0.818418	0.446984	0.179752	0.081476	-0.0502634	0.172231	0.403813	0.94509	1.03545	0.887469	0.755858
	IARS	Isoleucine--tRNA ligase, cytoplasmic	1	1	1	1	4	0	0	0	0	YES	266.379	339.362	302.871	432.296	389.934	411.115	433.192	339.833	386.513	423.069	281.844	352.457	363.239		0	146.16	15325000000	7595400000	7729200000	9.21296	9.39629	9.34535	9.4188	0.990731	0.840663	0.566749	0.777144	-0.0115298	-0.0449997	-0.149521	-0.0871203	1.00802	1.03168	1.1092	1.06225
	COX5A	Cytochrome c oxidase subunit 5A, mitochondrial	1	1	1	1	4	0	0	0	0	YES	363.567	430.987	397.277	351.04	322.147	336.593	373.448	388.779	381.113	359.372	308.699	334.036	362.255		0	18.371	11989000000	5733100000	6255700000	9.28457	9.34788	9.33365	9.29192	0.198352	0.00303439	0.308569	0.865844	-0.220429	0.529871	-0.26176	0.0492126	1.16508	0.692617	1.19894	0.966464		+
	SEC23A	Protein transport protein Sec23A	1	1	1	1	4	0	0	0	0	YES	399.489	394.9	397.195	331.83	478.968	405.399	379.128	302.213	340.671	185.12	419.864	302.492	361.439		0	202.05	10973000000	5969700000	5003000000	9.23734	9.30627	9.3378	9.23251	0.121279	0.124116	0.324405	0.227406	-0.26356	-0.291574	-0.253498	-0.365407	1.20044	1.22398	1.19209	1.28824
	GNE	Bifunctional UDP-N-acetylglucosamine 2-epimerase/N-acetylmannosamine kinase;UDP-N-acetylglucosamine 2-epimerase (hydrolyzing);N-acetylmannosamine kinase	1	1	1	1	4	0	0	0	0	YES	499.201	563.501	531.351	361.923	320.211	341.067	300.577	303.293	301.935	271.275	260.327	265.801	360.038		0	109.01	15409000000	5901300000	9508000000	9.44342	9.46379	9.44894	9.41345	0.5061	1.36306e-05	0.000898307	0.000448998	0.1141	0.781234	0.769433	1.05943	0.923958	0.581869	0.586648	0.479823		+
	XPO1	Exportin-1	1	1	1	1	4	0	0	0	0	YES	411.453	365.349	388.401	348.147	336.472	342.31	350.378	326.82	338.599	445.049	277.679	361.364	357.668		0	146.94	13567000000	6129500000	7437300000	9.32952	9.38187	9.41964	9.40714	0.179097	0.0791781	0.799517	0.78526	0.240375	0.310573	0.0540844	0.0805212	0.846525	0.806322	0.963206	0.945716
	PGM3	Phosphoacetylglucosamine mutase	1	1	1	1	4	0	0	0	0	YES	340.126	388.54	364.333	128.948	381.693	255.321	363.57	377.592	370.581	367.992	486.728	427.36	354.399		0	108.48	12608000000	6042900000	6565500000	9.36012	9.29918	9.35203	9.38216	0.780514	0.341332	0.710072	0.368835	0.0422241	-0.183441	-0.0988454	-0.272524	0.971157	1.13559	1.07092	1.20792
	ARPC1B	Actin-related protein 2/3 complex subunit 1B	1	1	1	1	4	0	0	0	0	YES	385.91	428.705	407.308	316.794	317.279	317.036	338.953	300.662	319.808	376.838	364.895	370.867	353.755		0	144.61	11899000000	5873600000	6025700000	9.30105	9.23086	9.33037	9.33963	0.214326	0.717625	0.777106	0.760542	-0.213136	-0.0746233	0.0608775	-0.0936635	1.15921	1.05309	0.958681	1.06708
	NUDC	Nuclear migration protein nudC	1	1	1	1	4	0	0	0	0	YES	412.448	320.666	366.557	355.446	357.03	356.238	402.733	291.635	347.184	349.037	332.101	340.569	352.637		0	50.482	12301000000	5561200000	6739600000	9.34329	9.30535	9.36639	9.36849	0.237317	0.446692	0.415639	0.389971	0.210264	0.13014	0.184725	0.258097	0.864379	0.913743	0.879817	0.83619
	NNMT	Nicotinamide N-methyltransferase	1	1	1	1	4	0	0	0	0	YES	495.237	520.753	507.995	459.941	150.003	304.972	240.079	336.862	288.47	295.918	300.027	297.973	349.852		0	88.681	11702000000	4779900000	6921700000	9.44223	9.34963	9.34932	9.28298	0.163738	0.0454523	0.038674	0.307681	0.249506	0.355016	0.477159	0.306612	0.841184	0.781861	0.718391	0.808538		+
	USO1	General vesicular transport factor p115	1	1	1	1	4	0	0	0	0	YES	320.521	264.788	292.655	261.926	444.128	353.027	309.798	407.621	358.71	415.907	353.697	384.802	347.298		0	201.07	10906000000	5665300000	5240900000	9.17866	9.33463	9.32395	9.31122	0.668527	0.103744	0.154535	0.137624	-0.0797982	-0.308037	-0.363939	-0.44902	1.05687	1.23802	1.28694	1.36511
	G3BP1	Ras GTPase-activating protein-binding protein 1	1	1	1	1	4	0	0	0	0	YES	287.544	396.781	342.163	382.976	198.2	290.588	363.984	448.343	406.163	311.402	385.565	348.483	346.849		0	63.773	13151000000	5692500000	7458900000	9.27256	9.49464	9.38376	9.36167	0.342588	0.000255299	0.0485271	0.0479021	0.166972	0.655535	0.455018	0.596363	0.89071	0.63484	0.729501	0.661419		+
	ERH	Enhancer of rudimentary homolog	1	1	1	1	4	0	0	0	0	YES	414.907	359.404	387.155	243.122	400.227	321.675	407.854	307.725	357.79	250.698	389.968	320.333	346.738		0	42.543	13980000000	6283900000	7696200000	9.31775	9.26188	9.39148	9.38478	0.5061	0.393035	0.487883	0.317311	0.1141	0.147046	0.156655	0.300534	0.923958	0.903098	0.897102	0.811952
	OXCT1	Succinyl-CoA:3-ketoacid coenzyme A transferase 1, mitochondrial	1	1	1	1	4	0	0	0	0	YES	341.065	510.736	425.9	458.897	325.922	392.41	247.096	343.901	295.498	251.238	289.55	270.394	346.051		0	262.33	12665000000	5779300000	6885800000	9.38996	9.42131	9.2819	9.28625	0.347531	0.148667	0.251326	0.430621	0.165172	0.25411	0.262433	0.236462	0.891822	0.838504	0.833681	0.848824
	CACYBP	Calcyclin-binding protein	1	1	1	1	4	0	0	0	0	YES	444.08	332.239	388.159	362.115	403.204	382.66	353.109	326.958	340.033	266.887	279.35	273.118	345.993		0	112.01	12877000000	5631500000	7245900000	9.30203	9.4422	9.3857	9.32006	0.0766198	0.0690543	0.0447585	0.0129905	0.319849	0.321928	0.462995	0.74932	0.801154	0.8	0.725479	0.594884
	CSRP1	Cysteine and glycine-rich protein 1	1	1	1	1	4	0	0	0	0	YES	248.764	283.182	265.973	334.332	335.915	335.124	363.052	340.913	351.982	444.5	406.607	425.553	344.658		0	89.168	12738000000	5819600000	6918800000	9.13491	9.259	9.35913	9.46923	0.501987	0.664383	0.413772	0.715141	0.1153	0.0708015	0.185486	0.108491	0.923191	0.952109	0.879353	0.927558
	ATP6V1A	V-type proton ATPase catalytic subunit A	1	1	1	1	4	0	0	0	0	YES	270.717	356.14	313.429	386.399	262.519	324.459	363.489	372.68	368.085	250.956	411.707	331.332	334.326		0	125.98	11140000000	5494600000	5645400000	9.17263	9.30341	9.34827	9.25566	0.61542	0.552335	0.789957	1	-0.0919557	0.0999011	-0.0722856	-0.00187669	1.06581	0.933097	1.05138	1.0013
	NSUN2	tRNA (cytosine(34)-C(5))-methyltransferase	1	1	1	1	4	0	0	0	0	YES	277.499	328.069	302.784	492.552	318.078	405.315	366.333	193.395	279.864	543.474	152.425	347.949	333.978		0	225.97	11109000000	5402200000	5706700000	9.18679	9.43903	9.35245	9.30991	0.514803	0.922908	0.858839	0.909432	-0.116379	-0.0257644	-0.0499796	0.032524	1.08401	1.01802	1.03525	0.977708
	AKR1D1	3-oxo-5-beta-steroid 4-dehydrogenase	1	1	1	1	4	0	0	0	0	YES	352.169	413.401	382.785	303.494	320.732	312.113	427.415	352.327	389.871	289.164	204.083	246.624	332.848		0	2.9372	10126000000	5336900000	4788900000	9.20241	9.25166	9.24824	9.13255	8.34205e-05	0.317311	0.00780416	0.57855	-0.654422	0.173511	-0.675604	-0.169177	1.57399	0.886682	1.59727	1.12442	+
	PDCD6IP	Programmed cell death 6-interacting protein	1	1	1	1	4	0	0	0	0	YES	299.372	418.273	358.823	377.45	314.317	345.883	384.266	340.954	362.61	302.477	223.565	263.021	332.584		0	100.29	11864000000	5786600000	6077800000	9.25353	9.32556	9.387	9.23576	0.775321	0.884198	0.415016	0.908795	0.0434844	-0.0347809	0.184978	-0.0363779	0.970309	1.0244	0.879662	1.02554
	EIF3A	Eukaryotic translation initiation factor 3 subunit A	1	1	1	1	4	0	0	0	0	YES	279.409	349.946	314.678	392.777	255.225	324.001	407.36	255.873	331.616	391.836	307.527	349.681	329.994		0	101.19	13003000000	6330800000	6672300000	9.23302	9.3845	9.35411	9.33872	0.547905	0.844386	0.930895	0.987811	0.102188	-0.0441219	0.0150693	-0.0064778	0.931619	1.03106	0.989609	1.0045
	CAD	CAD protein;Glutamine-dependent carbamoyl-phosphate synthase;Aspartate carbamoyltransferase;Dihydroorotase	1	1	1	1	4	0	0	0	0	YES	295.074	301.305	298.189	239.86	347.294	293.577	448.353	380.823	414.588	278.397	333.685	306.041	328.099		0	226.5	13173000000	5561000000	7612200000	9.2319	9.29576	9.48845	9.36143	0.259354	0.0457213	0.1914	0.205804	0.200253	0.354565	0.299596	0.380729	0.870398	0.782105	0.81248	0.768049		+
	AK2	Adenylate kinase 2, mitochondrial;Adenylate kinase 2, mitochondrial;Adenylate kinase 2, mitochondrial, N-terminally processed	1	1	1	1	4	0	0	0	0	YES	338.765	295.08	316.922	363.52	378.9	371.21	262.565	332.665	297.615	372.701	253.627	313.164	324.728		0	61.566	11463000000	5557200000	5905500000	9.18834	9.35434	9.33836	9.29092	0.44232	0.875619	0.508762	0.943677	-0.135539	0.0204844	-0.171677	0.0194884	1.0985	0.985902	1.12637	0.986582
	USP14	Ubiquitin carboxyl-terminal hydrolase 14;Ubiquitin carboxyl-terminal hydrolase	1	1	1	1	4	0	0	0	0	YES	358.186	337.391	347.789	354.417	351.627	353.022	362.768	252.399	307.583	306.872	271.193	289.033	324.357		0	125.79	10816000000	5260800000	5555100000	9.24628	9.29592	9.27896	9.21827	0.790364	0.825029	0.764879	0.940581	0.0398403	-0.0486957	0.0646069	-0.0243258	0.972763	1.03433	0.956206	1.017
	SEPT9	Septin-9	1	1	1	1	4	0	0	0	0	YES	346.876	374.603	360.739	363.198	406.144	384.671	282.199	245.019	263.609	268.172	271.208	269.69	319.677		0	197.42	11405000000	5502800000	5901900000	9.25554	9.34549	9.29522	9.26609	0.940865	0.992654	0.406669	0.695475	0.00417777	-0.00961146	0.188401	0.116498	0.997108	1.00668	0.877578	0.922424
	PSMD11	26S proteasome non-ATPase regulatory subunit 11	1	1	1	1	4	0	0	0	0	YES	210.184	440.006	325.095	477.126	172.327	324.726	467.339	220.648	343.993	323.986	227.881	275.934	317.437		0	103.46	12716000000	5919200000	6796900000	9.24733	9.35083	9.49206	9.2315	0.94148	0.957145	0.940152	0.544173	0.00403388	-0.017826	0.0123541	-0.184539	0.997208	1.01243	0.991473	1.13645
	ETF1	Eukaryotic peptide chain release factor subunit 1	1	1	1	1	4	0	0	0	0	YES	400.269	411.671	405.97	295.734	392.045	343.89	251.213	292.682	271.947	235.512	251.442	243.477	316.321		0	141.11	10038000000	4694100000	5344200000	9.28791	9.2985	9.23093	9.18534	0.932941	0.46919	0.275873	0.445489	-0.0234164	0.123401	0.249021	0.22885	1.01636	0.918021	0.841468	0.853315
	FAU	40S ribosomal protein S30	1	1	1	1	4	0	0	0	0	YES	283.779	275.968	279.874	454.369	496.637	475.503	233.588	299.964	266.776	228.28	247.149	237.714	314.967		0	5.0305	11268000000	5679600000	5588000000	9.12277	9.40369	9.17742	9.10748	0.692555	0.885523	0.772133	0.784941	-0.0744258	0.0182068	-0.0781372	-0.09985	1.05294	0.987459	1.05565	1.07166
	PSMB6	Proteasome subunit beta type-6	1	1	1	1	4	0	0	0	0	YES	259.932	257.853	258.893	395.379	312.755	354.067	344.933	305.671	325.302	370.64	236.965	303.802	310.516		0	106.98	11439000000	5327600000	6111500000	9.10914	9.3057	9.39742	9.32344	0.545023	0.713872	0.332976	0.638518	0.102994	-0.0755505	-0.249136	-0.143357	0.931099	1.05376	1.1885	1.10447
	KHSRP	Far upstream element-binding protein 2	1	1	1	1	4	0	0	0	0	YES	411.715	376.68	394.198	257.451	310.739	284.095	346.74	231.535	289.137	200.016	296.463	248.24	303.917		0	76.37	11770000000	5353300000	6416400000	9.33927	9.25358	9.28283	9.30653	0.346467	0.162886	0.805972	0.420991	0.165558	0.245252	0.0521377	0.241474	0.891583	0.843668	0.964506	0.845881
	RPS21	40S ribosomal protein S21	1	1	1	1	4	0	0	0	0	YES	267.557	258.865	263.211	450.585	369.391	409.988	251.99	314.561	283.276	245.84	253.675	249.757	301.558		0	57.641	12590000000	6222500000	6367700000	9.09639	9.33375	9.25888	9.19388	0.666113	0.716497	0.831803	0.90716	0.0706641	0.0579701	-0.0586833	-0.0369995	0.9522	0.960615	1.04151	1.02598
	ILF2	Interleukin enhancer-binding factor 2	1	1	1	1	4	0	0	0	0	YES	317.528	325.153	321.341	300.178	235.195	267.686	333.483	346.555	340.019	188.466	354.972	271.719	300.191		0	39.6	8468000000	4033800000	4434100000	9.19879	9.12959	9.34337	9.21283	0.844501	0.6988	0.963648	0.658336	0.0268709	-0.0863542	0.0054719	0.131853	0.981547	1.06168	0.996214	0.912659
	RAB1A	Ras-related protein Rab-1A	1	1	1	1	4	0	0	0	0	YES	358.521	323.181	340.851	330.732	198.083	264.407	252.193	313.822	283.008	269.919	342.879	306.399	298.666		0	70.024	8597800000	4528000000	4069800000	9.2571	9.20653	9.18041	9.21325	0.0999151	0.2221	0.235869	0.132152	-0.279266	-0.233142	-0.303882	-0.455336	1.21358	1.17539	1.23446	1.3711
	GSPT1;GSPT2	Eukaryotic peptide chain release factor GTP-binding subunit ERF3A;Eukaryotic peptide chain release factor GTP-binding subunit ERF3B	1	1	1	1	4	0	0	0	0	YES	330.686	244.044	287.365	470.072	179.571	324.822	373.051	283.955	328.503	329.103	141.504	235.303	293.998		0	129.84	19227000000	5259000000	13968000000	9.44287	9.24628	9.73517	9.66722	0.717289	0.561309	0.745189	0.94555	-0.0689675	0.097476	-0.087059	0.0187766	1.04897	0.934667	1.0622	0.987069
	SNRPF	Small nuclear ribonucleoprotein F	1	1	1	1	4	0	0	0	0	YES	323.22	269.879	296.549	228.194	293.561	260.877	397.141	202.642	299.892	360.336	234.969	297.653	288.743		0	9.6568	10202000000	4768500000	5433900000	9.19645	9.16622	9.36466	9.27685	0.972304	0.675506	0.820806	0.417971	-0.0153158	0.0984196	0.0476779	0.24306	1.01067	0.934056	0.967492	0.844951
	ALDH18A1	Delta-1-pyrroline-5-carboxylate synthase;Glutamate 5-kinase;Gamma-glutamyl phosphate reductase	1	1	1	1	4	0	0	0	0	YES	271.474	291.756	281.615	359.314	348.357	353.835	262.751	266.224	264.488	284.486	202.444	243.465	285.851		0	177.9	11068000000	5529300000	5538500000	9.12405	9.2843	9.26834	9.21877	0.126748	0.960109	0.815113	0.786861	-0.259893	-0.0171396	-0.0640877	-0.0833094	1.19739	1.01195	1.04542	1.05945
	UQCRC2	Cytochrome b-c1 complex subunit 2, mitochondrial	1	1	1	1	4	0	0	0	0	YES	251.718	328.341	290.029	307.661	217.753	262.707	381.778	276.445	329.112	274.072	246.571	260.322	285.542		0	137.69	8831000000	4583500000	4247500000	9.12428	9.27804	9.25677	9.16885	0.157042	0.81263	0.120431	0.198215	-0.241543	-0.0516384	-0.396517	-0.389376	1.18226	1.03644	1.31633	1.30983
	CKMT1A;CKMT1B	Creatine kinase U-type, mitochondrial	1	1	1	1	4	0	0	0	0	YES	328.417	228.505	278.461	144.06	371.238	257.649	275.797	283.184	279.49	267.96	285.123	276.541	273.036		0	119.36	10787000000	4986400000	5800500000	9.20935	9.32654	9.32773	9.27642	0.50377	0.177552	0.519871	0.309147	-0.119197	0.236707	0.14496	0.305679	1.08613	0.84868	0.904404	0.809062
	Ig mu (mouse)	IgM HC		1	1	1	3	0	0	0	0	YES	3.43525	0	1.71762	12218.6	10340.4	11279.5	16841.1	17882.8	17362	25912.6	20798.9	23355.8	12999.7		0	323.31	188140000000	169490000000	18658000000	6.68644	10.4836	10.6395	10.7529	1	1.66214e-177	1.69262e-215	1.43838e-53	NaN	-5.24808	-7.90111	-4.64238	NaN	38.004	239.04	24.9744		+
	AGR2	Anterior gradient protein 2 homolog		1	1	1	3	0	0	0	0	YES	270.964	213.752	242.358	468.399	510.229	489.314	1408.89	860.218	1134.55	906.678	1235.27	1070.97	734.3		0	91.38	18879000000	12557000000	6322800000	9.02661	9.27365	9.54879	9.53526	0.000132657	3.41918e-16	2.43205e-22	4.33472e-14	-0.868121	-1.51272	-2.45514	-2.27586	1.82528	2.85347	5.48366	4.84285	+	+
	PTGES3	Prostaglandin E synthase 3	1		1	1	3	0	0	0	0	YES	547.062	529.183	538.123	23.3137	221.133	122.223	588.091	760.898	674.495	391.491	739.571	565.531	475.093		0	24.929	15732000000	6539500000	9193000000	9.4612	9.12245	9.64362	9.64051	0.367077	0.315548	0.698208	0.342828	0.158208	0.235972	0.0852886	0.284988	0.896138	0.849113	0.942596	0.820749
	RCN1	Reticulocalbin-1	1		1	1	3	0	0	0	0	YES	398.757	305.286	352.021	150.208	200.04	175.124	701.073	617.228	659.151	917.099	505.924	711.512	474.452		0	68.359	14383000000	7536600000	6846500000	9.30475	9.0844	9.54142	9.56864	0.898062	0.312794	0.174792	0.0522212	0.0142124	0.237319	-0.347123	-0.586536	0.990197	0.84832	1.27202	1.50164
	SARS	Serine--tRNA ligase, cytoplasmic		1	1	1	3	0	0	0	0	YES	196.358	178.708	187.533	420.791	473.55	447.17	709.087	290.912	500	676.314	561.336	618.825	438.382		0	88.324	13494000000	7305400000	6188100000	8.98517	9.42526	9.42945	9.44599	0.809595	0.0118633	0.0223314	0.0355459	0.0395595	-0.472069	-0.580914	-0.634957	0.972952	1.3871	1.4958	1.55289		+
	SKP1	S-phase kinase-associated protein 1	1		1	1	3	0	0	0	0	YES	359.898	335.132	347.515	253.483	198.552	226.018	567.736	528.601	548.168	650.314	428.449	539.382	415.271		0	34.442	14441000000	7028100000	7412700000	9.23932	9.07893	9.55406	9.47087	0.794584	0.845207	0.736407	0.643816	-0.0522965	-0.0435716	-0.0899888	-0.141128	1.03691	1.03066	1.06436	1.10277
	HEL-S-109;NUCB2;Nucb2;DCAF5	Nucleobindin-2;Nesfatin-1		1	1	1	3	0	0	0	0	YES	260.226	167.619	213.923	248.21	280.401	264.306	486.543	631.403	558.973	497.901	670.316	584.108	405.327		0	114.67	10902000000	6556600000	4345800000	8.98763	9.0975	9.34482	9.33437	0.0463002	0.00122039	5.64664e-10	1.01846e-08	-0.456385	-0.721754	-1.5676	-1.72685	1.3721	1.64919	2.9641	3.31005	+	+
	HADHB	Trifunctional enzyme subunit beta, mitochondrial;3-ketoacyl-CoA thiolase	1	1		1	3	0	0	0	0	YES	416.475	427.512	421.994	533.399	644.528	588.963	281.397	191.162	236.279	336.413	264.62	300.516	386.938		0	96.768	13797000000	6810800000	6986100000	9.29046	9.56573	9.21733	9.23231	0.116648	0.824833	0.996782	0.804674	-0.266767	0.032242	-0.00421879	-0.0763563	1.20311	0.977899	1.00293	1.05435
	RUVBL1	RuvB-like 1	1	1		1	3	0	0	0	0	YES	347.489	375.773	361.631	541.703	636.082	588.893	207.148	219.179	213.163	314.92	329.598	322.259	371.487		0	136.41	14507000000	6833600000	7673300000	9.27665	9.52122	9.14364	9.32137	0.381674	0.558308	0.52752	0.759802	0.153157	0.0982848	0.168128	0.0905825	0.899281	0.934143	0.889996	0.939143
	PRMT1	Protein arginine N-methyltransferase 1	1	1	1		3	0	0	0	0	YES	517.874	340.798	429.336	439.28	406.232	422.756	333.427	453.928	393.677	204.757	262.402	233.579	369.837		0	71.441	12124000000	5605900000	6517800000	9.37001	9.37265	9.40033	9.19181	0.900492	0.836689	0.925051	0.311357	0.013641	-0.0459377	-0.0288667	0.304277	0.990589	1.03235	1.02021	0.809848
	ARF1;ARF3	ADP-ribosylation factor 1;ADP-ribosylation factor 3		1	1	1	3	0	0	0	0	YES	139.828	203.833	171.831	501.985	688.598	595.291	236.173	306.191	271.182	451.348	266.647	358.998	349.325		0	94.668	12922000000	6277100000	6645100000	8.97723	9.48376	9.19254	9.40934	0.76846	0.868959	0.324338	0.877476	-0.0740461	-0.038347	-0.253532	-0.0483078	1.05266	1.02694	1.19212	1.03405
	RTCB	tRNA-splicing ligase RtcB homolog	1	1		1	3	0	0	0	0	YES	408.532	359.184	383.858	298.612	697.425	498.018	218.476	247.633	233.055	218.313	332.418	275.365	347.574		0	120.77	13586000000	6700700000	6885100000	9.31635	9.4593	9.19706	9.23982	0.595083	0.724588	0.841384	0.676107	-0.0967303	-0.0729076	0.0415233	-0.127699	1.06935	1.05183	0.971628	1.09255
	CYCS	Cytochrome c	1		1	1	3	0	0	0	0	YES	416.754	360.114	388.434	60.9474	68.0753	64.5113	385.74	473.299	429.519	421.792	532.613	477.202	339.917		0	36.766	8089600000	3965000000	4124600000	9.26527	8.59741	9.3889	9.39576	0.635121	0.621308	0.531155	0.311645	-0.0873961	-0.110246	-0.162977	-0.306591	1.06245	1.07941	1.1196	1.23678
	ACAT2	Acetyl-CoA acetyltransferase, cytosolic	1	1	1		3	0	0	0	0	YES	382.089	393.027	387.558	463.902	463.879	463.891	359.397	236.909	298.153	179.525	167.147	173.336	330.735		0	284.1	16627000000	6271500000	10355000000	9.34877	9.48524	9.52961	9.23472	0.00467431	0.00098462	8.07397e-06	2.2385e-05	0.516721	0.589859	1.03598	1.28024	0.698959	0.664408	0.487686	0.411726	+	+
	STRAP	Serine-threonine kinase receptor-associated protein	1	1	1		3	0	0	0	0	YES	379.248	362.176	370.712	334.593	404.861	369.727	385.562	387.902	386.732	174.315	201.32	187.817	328.747		0	61.943	12662000000	5747300000	6915000000	9.29502	9.38595	9.32362	9.09015	0.921232	0.860829	0.865956	0.767496	0.00877379	0.0238941	0.0342158	0.106884	0.993937	0.983574	0.976562	0.928591
	ACAT1	Acetyl-CoA acetyltransferase, mitochondrial	1		1	1	3	0	0	0	0	YES	279.775	301.871	290.823	177.723	247.219	212.471	440.979	370.959	405.969	285.105	496.009	390.557	324.955		0	125.47	10299000000	4732800000	5565800000	9.14151	9.12908	9.41103	9.42434	0.916341	0.664661	0.462582	0.188347	0.00992034	0.101919	0.166201	0.39594	0.993147	0.931793	0.891186	0.759994
	CANX	Calnexin		1	1	1	3	0	0	0	0	YES	213.431	115.412	164.422	423.508	291.736	357.622	453.353	303.918	378.635	390.245	406.385	398.315	324.748		0	46.84	10347000000	6278100000	4068500000	8.93927	9.18554	9.22401	9.1669	0.108423	7.08747e-05	5.9333e-12	9.5851e-12	-0.369185	-0.740866	-1.73928	-2.05361	1.29162	1.67118	3.33868	4.15144		+
	LASP1	LIM and SH3 domain protein 1	1		1	1	3	0	0	0	0	YES	290.784	309.002	299.893	230.88	244.99	237.935	392.49	330.059	361.275	400.784	362.892	381.838	320.235		0	97.067	9613700000	4559400000	5054300000	9.16967	9.1358	9.32799	9.34412	0.94148	0.618256	0.862656	0.525489	0.00403388	0.117163	-0.0487554	-0.19309	0.997208	0.921999	1.03437	1.14321
	PCNA	Proliferating cell nuclear antigen	1		1	1	3	0	0	0	0	YES	409.694	316.73	363.212	161.966	207.738	184.852	477.103	283.922	380.513	374.965	297.849	336.407	316.246		0	88.807	15271000000	5956100000	9315000000	9.3411	9.29352	9.52154	9.47651	0.0321172	0.0111394	0.0465091	0.0619265	0.389126	0.452595	0.459222	0.56267	0.763592	0.730727	0.727379	0.677048	+	+
	DBN1	Drebrin	1		1	1	3	0	0	0	0	YES	228.396	316.964	272.68	137.475	100.126	118.801	409.061	354.86	381.961	466.417	512.775	489.596	315.759		0	89.895	9112500000	5097600000	4015000000	9.09857	8.80842	9.30367	9.32728	0.331667	0.0354971	0.00698259	0.00541827	-0.168723	-0.46925	-0.68499	-0.839441	1.12406	1.38439	1.60769	1.78936		+
	RPS24	40S ribosomal protein S24	1		1	1	3	0	0	0	0	YES	418.33	460.327	439.328	159.418	224.857	192.138	340.703	323.605	332.154	260.916	334.556	297.736	315.339		0	10.061	8151700000	3686600000	4465100000	9.35822	9.04747	9.32253	9.23459	0.28477	0.702601	0.581938	0.84116	0.189414	0.0897694	0.123269	-0.0622338	0.876962	0.939673	0.918105	1.04408
	FDPS	Farnesyl pyrophosphate synthase	1	1	1		3	0	0	0	0	YES	380.386	436.32	408.353	386.261	345.805	366.033	276.138	286.601	281.37	184.728	207.877	196.303	313.015		0	151.75	14448000000	5038100000	9409500000	9.38634	9.39109	9.46154	9.38194	0.00795832	0.00260935	1.3457e-06	1.63389e-07	0.48419	0.53824	1.12221	1.58178	0.714898	0.68861	0.45939	0.334068	+	+
	UBE2V1	Ubiquitin-conjugating enzyme E2 variant 1	1		1	1	3	0	0	0	0	YES	380.402	410.772	395.587	148.819	233.311	191.065	343.013	340.109	341.561	261.041	382.484	321.763	312.494		0	23.364	11047000000	4658500000	6388500000	9.31116	9.32816	9.32576	9.33518	0.404128	0.720496	0.300785	0.390631	0.145612	0.0569996	0.236217	0.257735	0.903996	0.961261	0.848969	0.8364
	COPE	Coatomer subunit epsilon		1	1	1	3	0	0	0	0	YES	210.542	162.739	186.64	137.13	439.671	288.4	347.956	382.917	365.436	409.529	385.985	397.757	309.558		0	112.62	11782000000	6101500000	5680200000	9.1422	9.3142	9.41611	9.29866	0.0762295	0.135548	0.0551905	0.113587	-0.3002	-0.283246	-0.48835	-0.478407	1.23131	1.21693	1.40284	1.3932
	HNRNPR	Heterogeneous nuclear ribonucleoprotein R	1	1		1	3	0	0	0	0	YES	424.809	215.626	320.217	194.746	572.503	383.625	203.218	131.972	167.595	367.662	346.079	356.871	307.077		0	58.403	13025000000	6656200000	6369200000	9.33005	9.46465	8.99462	9.3265	0.667579	0.747734	0.909776	0.548635	-0.0800117	-0.0672433	-0.050876	0.179511	1.05703	1.04771	1.03589	0.883002
	ACOT7	Cytosolic acyl coenzyme A thioester hydrolase	1	1		1	3	0	0	0	0	YES	298.059	366.323	332.191	303.309	341.846	322.578	260.685	222.71	241.698	340.888	318.963	329.925	306.598		0	38.085	10099000000	4884400000	5214100000	9.25353	9.2911	9.22448	9.27834	0.609481	0.786399	0.760373	0.540311	0.0854246	-0.0579022	0.0659858	-0.186295	0.942507	1.04095	0.955292	1.13784
	TAF15	TATA-binding protein-associated factor 2N	1		1	1	3	0	0	0	0	YES	379.59	360.008	369.799	126.154	228.802	177.478	372.889	308.667	340.778	381.046	267.581	324.314	303.092		0	43.017	11893000000	5559800000	6333300000	9.26618	9.07269	9.41581	9.39513	0.677432	0.662587	0.968868	0.619663	0.0677764	0.102591	-0.0149951	0.148218	0.954107	0.931359	1.01045	0.902364
	PDHB	Pyruvate dehydrogenase E1 component subunit beta, mitochondrial	1	1	1		3	0	0	0	0	YES	350.123	425.48	387.801	368.846	338.98	353.913	275.903	246.619	261.261	212.577	196.988	204.782	301.939		0	58.127	10637000000	5157600000	5479300000	9.29303	9.27487	9.26644	9.14016	0.856411	0.296997	0.50229	0.215172	-0.0392807	0.181293	0.151339	0.372952	1.0276	0.881912	0.900414	0.772201
	TCEB1	Transcription elongation factor B polypeptide 1	1		1	1	3	0	0	0	0	YES	384.414	464.013	424.214	68.7391	158.713	113.726	314.773	401.029	357.901	262.694	334.429	298.562	298.601		0	57.483	11913000000	5968100000	5945100000	9.33039	8.93033	9.32492	9.25957	0.471545	0.858411	1	0.514827	-0.12762	0.0419438	-0.00515967	0.195096	1.09249	0.971345	1.00358	0.873515
	MCM6	DNA replication licensing factor MCM6	1	1	1		3	0	0	0	0	YES	326.38	337.066	331.723	454.615	232.314	343.464	272.435	302.18	287.308	254.2	204.899	229.55	298.011		0	228.38	10973000000	4936700000	6035900000	9.22313	9.34171	9.37099	9.1797	0.791526	0.115818	0.596451	0.296151	0.0395595	0.27739	0.11836	0.314058	0.972952	0.825083	0.921234	0.804376
	ATP5C1	ATP synthase subunit gamma, mitochondrial	1	1	1		3	0	0	0	0	YES	369.434	241.181	305.307	399.692	391.547	395.62	237.559	279.141	258.35	201.411	232.72	217.065	294.086		0	24.422	10844000000	4690800000	6153100000	9.13367	9.3439	9.39596	9.2445	0.0143778	0.773401	0.317311	0.314881	-0.410774	0.0443242	0.228111	0.302056	1.3294	0.969744	0.853752	0.811096	+
	UQCRC1	Cytochrome b-c1 complex subunit 1, mitochondrial	1		1	1	3	0	0	0	0	YES	263.291	431.772	347.532	234.464	194.006	214.235	229.237	395.655	312.446	204.78	391.615	298.198	293.103		0	77.587	10318000000	5211000000	5106600000	9.215	9.13236	9.27846	9.24576	0.386863	0.927171	0.139859	0.207738	-0.151442	-0.020399	-0.377201	-0.381291	1.11068	1.01424	1.29882	1.30251
	VPS35	Vacuolar protein sorting-associated protein 35	1	1		1	3	0	0	0	0	YES	289.494	321.3	305.397	321.906	360.996	341.451	247.461	153.014	200.238	347.477	277.964	312.721	289.952		0	87.824	11535000000	5397600000	6137800000	9.25263	9.35582	9.16146	9.38963	0.570796	0.420738	0.41632	0.646741	0.0958569	0.138159	0.220206	0.136716	0.935716	0.908678	0.858443	0.909587
	EIF3I	Eukaryotic translation initiation factor 3 subunit I	1	1		1	3	0	0	0	0	YES	240.088	302.06	271.074	343.043	383.548	363.295	259.948	229.854	244.901	306.183	215.234	260.708	284.995		0	55.246	8906900000	4584600000	4322300000	9.16047	9.35369	9.05858	9.17484	0.368852	0.751026	0.87061	0.991418	-0.1569	-0.0664424	-0.0671678	-0.00511617	1.11489	1.04713	1.04766	1.00355
	AK1	Adenylate kinase isoenzyme 1	1		1	1	3	0	0	0	0	YES	252.354	307.34	279.847	283.845	115.977	199.911	351.594	286.894	319.244	349.154	319.256	334.205	283.302		0	69.853	10488000000	5156500000	5331700000	9.1322	9.24373	9.35274	9.33622	0.729041	0.265568	0.834346	0.712502	-0.0663971	-0.213287	0.0436244	0.109561	1.0471	1.15933	0.970214	0.92687
	TFG	Protein TFG	1	1		1	3	0	0	0	0	YES	261.564	238.001	249.782	352.314	373.746	363.03	208.534	201.968	205.251	341.945	263.321	302.633	280.174		0	102.26	8602100000	4322900000	4279200000	9.07137	9.2833	9.09614	9.18893	0.659402	0.141162	0.269917	0.0169662	-0.081858	-0.279354	-0.376283	-0.720897	1.05838	1.21365	1.29799	1.64821
	RBMX;RBMXL1	RNA-binding motif protein, X chromosome;RNA-binding motif protein, X chromosome, N-terminally processed;RNA binding motif protein, X-linked-like-1	1	1	1		3	0	0	0	0	YES	299.181	317.606	308.394	211.232	376.781	294.007	269.064	299.566	284.315	236.076	224.935	230.506	279.305		0	64.34	11230000000	5160900000	6068600000	9.19548	9.29217	9.28756	9.18724	0.236255	0.619567	0.995276	0.326794	0.210763	0.0821575	-0.00665169	0.294665	0.86408	0.944644	1.00462	0.815262
	HNRNPDL	Heterogeneous nuclear ribonucleoprotein D-like	1		1	1	3	0	0	0	0	YES	225.482	294.279	259.881	202.882	207.474	205.178	589.769	157.561	373.665	301.897	233.615	267.756	276.62		0	60.433	8381000000	4317900000	4063100000	9.08739	9.03731	9.31095	9.18707	0.790502	0.551475	0.539543	0.964446	-0.0531644	-0.13291	-0.159767	-0.0153013	1.03754	1.0965	1.11711	1.01066
	CNPY2	Protein canopy homolog 2		1	1	1	3	0	0	0	0	YES	127.26	333.191	230.225	321.99	331.282	326.636	315.3	287.048	301.174	273.139	222.995	248.067	276.526		0	55.605	11161000000	5687000000	5473800000	9.05926	9.25346	9.27453	9.19204	0.998091	0.826651	0.50715	0.663616	-0.0100181	0.0318186	-0.172311	-0.132863	1.00697	0.978186	1.12686	1.09647
	CMPK1	UMP-CMP kinase		1	1	1	3	0	0	0	0	YES	249.059	162.195	205.627	265.218	382.712	323.965	354.503	217.117	285.81	302.437	278.201	290.319	276.43		0	83.052	11471000000	5444000000	6026900000	9.22802	9.318	9.28603	9.21085	0.465641	0.98725	0.811984	0.831773	-0.129197	-0.010861	0.0503276	-0.0658534	1.09369	1.00756	0.965717	1.0467
	TPR	Nucleoprotein TPR	1		1	1	3	0	0	0	0	YES	364.387	155.842	260.115	97.2426	124.24	110.741	391.234	473.469	432.352	290.817	311.875	301.346	276.138		0	212.27	9209300000	4198500000	5010800000	9.28212	8.92973	9.42547	9.29713	0.217271	0.616264	0.623286	0.839635	0.219958	0.117828	-0.128945	-0.0628213	0.85859	0.921574	1.09349	1.04451
	PSMB7	Proteasome subunit beta type-7		1	1	1	3	0	0	0	0	YES	181.768	159.596	170.682	291.137	357.88	324.509	306.022	236.649	271.336	272.497	403.233	337.865	276.098		0	44.398	10743000000	5211900000	5531200000	8.92772	9.23752	9.27082	9.26954	0.649578	0.953864	0.613964	0.751825	0.081476	-0.0185857	-0.132277	-0.0971161	0.94509	1.01297	1.09602	1.06963
	SEC13	Protein SEC13 homolog	1	1	1		3	0	0	0	0	YES	173.394	353.798	263.596	334.355	259.037	296.696	166.884	419.287	293.085	172.795	296.899	234.847	272.056		0	155.7	9846600000	5076400000	4770100000	9.19432	9.18179	9.20607	9.19841	0.349629	0.491224	0.257523	0.414926	-0.162912	-0.153623	-0.290498	-0.247406	1.11954	1.11236	1.22306	1.18707
	SUMO2	Small ubiquitin-related modifier 2	1	1	1		3	0	0	0	0	YES	285.276	318.838	302.057	170.401	398.079	284.24	295.431	327.152	311.292	182.056	194.62	188.338	271.482		0	17.784	10361000000	4481200000	5879800000	9.21315	9.41191	9.29585	9.09604	0.311376	0.0435439	0.48545	0.286379	0.178746	0.358284	0.157561	0.362554	0.88347	0.780092	0.896539	0.777786		+
	TNPO1	Transportin-1	1		1	1	3	0	0	0	0	YES	329.555	329.172	329.364	214.77	209.065	211.918	318.25	210.622	264.436	330.301	227.675	278.988	271.176		0	60.063	9040600000	4331300000	4709300000	9.23063	9.08508	9.27342	9.25959	0.849868	0.774485	0.604384	0.791156	0.0255958	0.0673633	0.115699	-0.0816291	0.982415	0.954381	0.922935	1.05821
	LGALS3	Galectin-3;Galectin		1	1	1	3	0	0	0	0	YES	187.817	139.638	163.728	198.208	387.551	292.879	251.909	344.948	298.429	265.523	275.144	270.334	256.342		0	48.929	9482600000	4895600000	4587000000	8.9481	9.27427	9.24711	9.22845	0.387781	0.00544966	0.92021	0.454785	-0.202207	-0.520583	0.0182068	0.224164	1.15046	1.43453	0.987459	0.856091		+
	MCM3	DNA replication licensing factor MCM3	1		1	1	3	0	0	0	0	YES	326.579	263.813	295.196	190.924	190.223	190.574	230.858	296.059	263.458	291.177	255.085	273.131	255.59		0	127.37	11715000000	4883500000	6831700000	9.31103	9.14355	9.31553	9.39277	0.719744	0.18652	0.390932	0.191659	0.0571383	0.310573	0.19497	0.392977	0.961169	0.806322	0.873591	0.761557
	YBX1	Nuclease-sensitive element-binding protein 1		1	1	1	3	0	0	0	0	YES	181.999	164.446	173.222	257.221	268.561	262.891	271.081	261.175	266.128	240.253	345.738	292.995	248.809		0	213.02	8293100000	4101800000	4191300000	8.97109	9.13248	9.22807	9.23459	0.871564	0.159578	0.840914	0.576488	-0.0441665	-0.313889	0.0416635	-0.170086	1.03109	1.24305	0.971534	1.12513
	ARHGDIA	Rho GDP-dissociation inhibitor 1	1	1		1	3	0	0	0	0	YES	265.376	260.051	262.714	218.6	341.539	280.069	227.341	178.985	203.163	239.422	255.441	247.432	248.344		0	76.091	9400500000	4490200000	4910300000	9.14	9.15314	9.14943	9.23086	0.184688	0.735939	0.6434	0.406052	0.237197	-0.0752616	0.119555	0.249385	0.848392	1.05355	0.920471	0.841255
	BSG	Basigin	1		1	1	3	0	0	0	0	YES	256.079	229.306	242.693	225.868	214.366	220.117	309.782	259.088	284.435	239.312	250.515	244.914	248.04		0	33.904	6993800000	3935200000	3058600000	9.03366	8.99395	9.14317	9.04552	0.73799	0.00814804	0.00344194	0.0433739	-0.0830801	-0.590484	-0.975198	-0.795333	1.05928	1.50575	1.96591	1.73548		+
	CDC37	Hsp90 co-chaperone Cdc37;Hsp90 co-chaperone Cdc37, N-terminally processed	1	1		1	3	0	0	0	0	YES	305.915	219.184	262.549	188.514	359.97	274.242	225.315	78.4198	151.867	254.012	299.132	276.572	241.308		0	73.174	9156300000	5013700000	4142600000	9.10061	9.17915	9.06382	9.15168	0.798316	0.587983	0.548016	0.289605	-0.0515038	-0.120906	-0.211097	-0.32081	1.03634	1.08742	1.15757	1.24903
	BTF3	Transcription factor BTF3		1	1	1	3	0	0	0	0	YES	89.1088	0	44.5544	295.32	296.787	296.053	285.667	395.444	340.555	321.698	212.066	266.882	237.011		0	69.794	7844000000	3632500000	4211500000	8.62815	9.19852	9.33137	9.28767	0.358002	0.0157468	0.216571	0.141956	-0.214709	0.430178	0.283092	0.442227	1.16047	0.74217	0.821828	0.735998		+
	DSP	Desmoplakin	1		1		2	0	0	0	0	YES	668.623	573.239	620.931	198.468	202.804	200.636	3296.67	3428.53	3362.6	172.708	115.037	143.873	1082.01		0	323.31	22499000000	13714000000	8785000000	9.52714	9.22414	10.1052	9.16803	0.0422071	0.000109245	8.66752e-19	0.000595709	-0.342561	0.694033	-2.23569	1.03647	1.26801	0.618123	4.70987	0.48752	+	+
	DNAJA1	DnaJ homolog subfamily A member 1			1	1	2	0	0	0	0	YES	90.8679	145.304	118.086	80.204	62.8714	71.5377	177.474	2593.89	1385.68	54.4962	2387.55	1221.02	699.081		0	80.576	18889000000	7811500000	11077000000	8.89011	8.73486	9.93807	9.87415	0.165183	0.0464803	0.56305	0.553705	0.264837	0.468114	0.129745	0.177216	0.832293	0.722909	0.913993	0.884408		+
	JUP	Junction plakoglobin	1		1		2	0	0	0	0	YES	391.044	233.597	312.32	112.355	152.1	132.227	1720.86	1909.35	1815.1	219.511	190.834	205.173	616.206		0	198.15	11733000000	7204700000	4528800000	9.18015	8.91617	9.78702	9.18179	0.118709	0.553048	5.09086e-13	0.349047	-0.265327	0.139469	-1.82536	0.281312	1.20191	0.907853	3.54396	0.822842
	DSTN	Destrin	1	1			2	0	0	0	0	YES	536.73	712.998	624.864	942.033	464.627	703.33	235.42	138.937	187.178	133.138	109.724	121.431	409.201		0	149.82	12125000000	6023300000	6101800000	9.49553	9.61261	9.04179	8.89375	0.728626	0.963942	0.866764	0.664916	-0.0664878	0.000288558	0.0346383	0.152508	1.04716	0.9998	0.976277	0.899685
	MANF	Mesencephalic astrocyte-derived neurotrophic factor			1	1	2	0	0	0	0	YES	72.8965	80.8218	76.8592	275.226	121.542	198.384	674.357	649.06	661.709	601.074	715.947	658.511	398.866		0	41.999	10244000000	6908000000	3335600000	8.66331	8.98956	9.34829	9.34025	0.739885	1.16994e-07	3.43044e-17	5.6821e-15	-0.0825147	-1.18239	-2.1298	-2.35424	1.05886	2.26953	4.37656	5.11326		+
	HSPA6;HSPA7	Heat shock 70 kDa protein 6;Putative heat shock 70 kDa protein 7			1	1	2	0	0	0	0	YES	128.127	96.7308	112.429	87.8637	111.476	99.6697	720.553	709.647	715.1	594.297	600.395	597.346	381.136		0	43.551	9860100000	5060400000	4799700000	8.74624	8.75631	9.56285	9.42805	0.641279	0.389349	0.0870585	0.0940817	-0.112662	0.202386	-0.436373	-0.506107	1.08122	0.869112	1.3532	1.42021
	RPS23	40S ribosomal protein S23	1	1			2	0	0	0	0	YES	383.737	469.256	426.497	694.498	705.174	699.836	218.136	140.666	179.401	215.601	195.396	205.499	377.808		0	10.138	13455000000	6396700000	7058700000	9.33864	9.5662	9.17056	9.08796	0.664503	0.935519	0.151358	0.807488	0.0710762	0.0067647	0.329526	0.0896338	0.951928	0.995322	0.795798	0.939761
	CD63	CD63 antigen			1	1	2	0	0	0	0	YES	76.0637	93.271	84.6674	91.2637	20.235	55.7493	646.766	628.204	637.485	568.775	628.081	598.428	344.083		0	3.678	6764100000	4495800000	2268300000	8.6201	8.59529	9.35164	9.28387	0.636819	0.14868	7.25054e-17	2.14744e-13	-0.114067	-0.322307	-2.10762	-2.21223	1.08227	1.25033	4.30979	4.63392
	PAICS	Multifunctional protein ADE2;Phosphoribosylaminoimidazole-succinocarboxamide synthase;Phosphoribosylaminoimidazole carboxylase	1	1			2	0	0	0	0	YES	449.548	302.166	375.857	535.072	539.555	537.314	328.913	133.839	231.376	219.276	199.308	209.292	338.46		0	124.17	11871000000	4981100000	6890100000	9.38899	9.50371	9.26996	9.27875	0.0802053	0.235324	0.0161242	0.0218852	0.315914	0.207393	0.55611	0.691356	0.803342	0.866101	0.680133	0.619272
	RPS16	40S ribosomal protein S16	1			1	2	0	0	0	0	YES	680.499	618.79	649.644	57.4867	260.987	159.237	210.6	255.378	232.989	255.916	261.618	258.767	325.159		0	18.485	11879000000	4953800000	6925300000	9.49051	9.23167	9.30511	9.32513	0.929526	0.202995	0.000719721	0.0124032	-0.0241204	0.223052	0.78375	0.754289	1.01686	0.856751	0.580855	0.592839
	SCP2	Non-specific lipid-transfer protein	1			1	2	0	0	0	0	YES	444.326	362.72	403.523	266.738	201.111	233.924	271.803	181.989	226.896	349.711	458.289	404	317.086		0	40.032	9597600000	4775500000	4822100000	9.28144	9.25054	9.19279	9.33203	0.414119	0.333648	0.753065	0.33521	-0.143468	0.167486	-0.0844409	-0.292104	1.10456	0.890393	1.06028	1.22442
	RNH1	Ribonuclease inhibitor			1	1	2	0	0	0	0	YES	214.028	238.53	226.279	87.7102	117.458	102.584	501.696	463.589	482.642	467.623	423.515	445.569	314.269		0	183.59	9867800000	4784000000	5083800000	9.04614	8.88623	9.44318	9.39941	0.780739	0.515088	0.82413	0.819179	-0.0704362	-0.14527	-0.0611647	-0.0707241	1.05003	1.10594	1.04331	1.05024
	CMBL	Carboxymethylenebutenolidase homolog	1	1			2	0	0	0	0	YES	208.305	320.885	264.595	560.768	523.177	541.972	241.4	199.735	220.567	191.976	177.015	184.496	302.908		0	18.73	9542400000	4397600000	5144800000	9.13478	9.47333	9.20772	9.15317	0.759827	0.599612	0.0798063	0.0425454	0.0472592	0.087327	0.403486	0.611456	0.967773	0.941265	0.756029	0.654536
	HDLBP	Vigilin	1		1		2	0	0	0	0	YES	398.208	342.233	370.22	186.273	251.119	218.696	433.646	358.814	396.23	240.652	195.697	218.175	300.83		0	138.19	10943000000	5885900000	5057100000	9.26998	9.14857	9.34325	9.14376	0.00513566	0.174015	0.0175921	0.415154	-0.468252	-0.303383	-0.603446	-0.247286	1.38343	1.23403	1.51934	1.18697	+
	RPL29	60S ribosomal protein L29	1	1			2	0	0	0	0	YES	311.797	355.241	333.519	414.497	489.855	452.176	226.093	242.641	234.367	162.679	190.122	176.4	299.116		0	13.126	9551700000	4951500000	4600300000	9.29833	9.38148	9.06845	8.94737	0.371526	0.511862	0.177284	0.335019	0.156655	-0.128913	-0.457118	-0.374973	0.897102	1.09347	1.3728	1.29682
	ILF3	Interleukin enhancer-binding factor 3	1	1			2	0	0	0	0	YES	275.684	284.935	280.309	538.242	436.342	487.292	208.995	241.106	225.051	217.725	166.165	191.945	296.149		0	159.23	11050000000	5501700000	5548600000	9.13682	9.50957	9.15576	9.14032	0.856979	0.69952	0.812425	0.445732	-0.0391621	-0.0791122	0.0546401	0.228726	1.02752	1.05637	0.962835	0.853388
	TYMP	Thymidine phosphorylase			1	1	2	0	0	0	0	YES	64.464	79.3563	71.9102	230.949	259.11	245.03	404.629	347.497	376.063	413.126	433.865	423.496	279.125		0	53.273	7333100000	4999100000	2333900000	8.56384	8.92853	9.19109	9.22407	0.190054	1.11632e-11	6.12222e-09	2.01549e-10	0.249627	-1.51548	-1.47017	-1.91735	0.841114	2.85894	2.77054	3.77729		+
	ANXA4	Annexin A4;Annexin	1			1	2	0	0	0	0	YES	263.347	348.307	305.827	237.688	244.528	241.108	159.453	331.674	245.564	344.508	293.874	319.191	277.922		0	83.236	11060000000	4791700000	6268000000	9.17455	9.1245	9.45086	9.47012	0.686338	0.366639	0.0352661	0.25756	-0.0758089	0.212258	0.485942	0.340505	1.05395	0.863185	0.714031	0.789765
	PHB2	Prohibitin-2	1	1			2	0	0	0	0	YES	326.953	388.26	357.607	352.284	312.066	332.175	231.571	238.703	235.137	166.8	206.135	186.467	277.846		0	50.818	9971100000	4710300000	5260800000	9.27869	9.30194	9.19426	9.10792	0.202387	0.260202	0.216382	0.227119	-0.218548	0.196355	0.283211	0.409581	1.16356	0.872753	0.82176	0.752842
	HADH	Hydroxyacyl-coenzyme A dehydrogenase, mitochondrial		1	1		2	0	0	0	0	YES	247.658	191.55	219.604	173.724	394.692	284.208	436.539	252.058	344.298	160.469	307.899	234.184	270.574		0	69.356	9922800000	4384600000	5538200000	9.08023	9.20911	9.38356	9.21013	0.420542	0.0187663	0.105549	0.190672	0.140255	0.41846	0.372395	0.393856	0.907359	0.748223	0.772499	0.761093		+
	EIF6	Eukaryotic translation initiation factor 6			1	1	2	0	0	0	0	YES	188.989	138.611	163.8	22.0258	27.8546	24.9402	579.494	461.421	520.458	339.602	402.378	370.99	270.047		0	160.45	6757300000	3199500000	3557800000	8.86736	8.04438	9.4898	9.31628	0.856788	0.271707	0.5139	0.739393	-0.0483973	-0.354409	-0.169663	-0.102063	1.03412	1.27846	1.1248	1.07331
	TPD52	Tumor protein D52	1	1			2	0	0	0	0	YES	306.799	267.787	287.293	305.259	348.951	327.105	229.618	247.739	238.678	236.343	217.23	226.786	269.966		0	67.272	10292000000	4845800000	5446000000	9.19	9.27409	9.16584	9.12015	0.692673	0.691454	0.804587	0.973324	0.0639171	-0.0811253	0.052555	-0.00453715	0.956663	1.05784	0.964227	1.00315
	RPS19	40S ribosomal protein S19	1	1			2	0	0	0	0	YES	431.249	382.617	406.933	368.324	170.898	269.611	198.486	228.986	213.736	170.593	193.852	182.222	268.125		0	34.042	9404100000	4187600000	5216500000	9.30451	9.23401	9.16994	9.14186	0.612555	0.268528	0.147885	0.0417872	0.0846086	0.192825	0.332393	0.61372	0.94304	0.874891	0.794218	0.653509
	EIF4H	Eukaryotic translation initiation factor 4H			1	1	2	0	0	0	0	YES	147.644	209.771	178.708	257.198	234.198	245.698	316.969	309.032	313.001	309.646	325.924	317.785	263.798		0	53.065	8488500000	4223100000	4265400000	8.96456	9.1313	9.25933	9.23475	0.631578	0.131394	0.531071	0.622237	-0.115723	-0.336683	-0.16301	-0.150257	1.08352	1.26285	1.11962	1.10977
	DLAT	Dihydrolipoyllysine-residue acetyltransferase component of pyruvate dehydrogenase complex, mitochondrial;Acetyltransferase component of pyruvate dehydrogenase complex	1	1			2	0	0	0	0	YES	192.609	325.878	259.244	273.277	433.395	353.336	251.65	225.397	238.524	205.141	200.425	202.783	263.471		0	66.422	8548200000	4031000000	4517200000	9.14429	9.31456	9.18594	9.14925	0.464187	0.254954	0.392725	0.286177	0.126576	0.19862	0.194213	0.320658	0.916003	0.871384	0.87405	0.800705
	SRSF2	Serine/arginine-rich splicing factor 2			1	1	2	0	0	0	0	YES	186.695	181.141	183.918	46.3886	63.5488	54.9687	417.545	428.737	423.141	399.186	383.118	391.152	263.295		0	72.734	8422400000	4057000000	4365400000	8.9604	8.57334	9.38148	9.34702	0.907304	0.529853	0.450108	0.864582	-0.0339831	-0.140969	-0.195484	-0.0532392	1.02383	1.10265	1.14511	1.03759
	SLC25A3	Phosphate carrier protein, mitochondrial	1		1		2	0	0	0	0	YES	290.067	321.164	305.616	115.003	182.562	148.782	427.698	422.462	425.08	253.072	85.5377	169.305	262.196		0	59.296	8287900000	4659300000	3628600000	9.15256	8.9313	9.30625	9.15637	0.114369	0.688857	0.0224725	0.514827	-0.268382	-0.0893595	-0.58031	0.195096	1.20446	1.0639	1.49517	0.873515
	CAPN2	Calpain-2 catalytic subunit			1	1	2	0	0	0	0	YES	142.089	191.913	167.001	116.369	146.718	131.543	400.731	265.177	332.954	466.448	353.087	409.768	260.317		0	45.176	7897600000	4138500000	3759100000	8.92584	8.86181	9.33228	9.32463	0.789422	0.245461	0.173338	0.0311055	-0.0678935	-0.259202	-0.34828	-0.651111	1.04819	1.19682	1.27304	1.57038
	RANBP2	E3 SUMO-protein ligase RanBP2			1	1	2	0	0	0	0	YES	207.183	214.122	210.653	234.802	239.799	237.301	326.604	298.535	312.57	232.362	292.369	262.366	255.722		0	103.77	9045000000	4133700000	4911200000	9.09212	9.14937	9.30083	9.29557	0.71418	0.527341	0.945522	0.659281	0.0585242	0.148609	0.0107799	0.131458	0.960246	0.90212	0.992556	0.912909
	RANGAP1	Ran GTPase-activating protein 1	1	1			2	0	0	0	0	YES	274.029	385.896	329.962	337.172	214.623	275.897	178.892	230.057	204.475	214.026	196.124	205.075	253.852		0	108.86	8857300000	4147900000	4709400000	9.21492	9.256	9.13713	9.17278	0.744105	0.506098	0.507936	0.383197	-0.0631228	-0.130571	0.176833	0.261832	1.04472	1.09473	0.884643	0.834028
	ASNS	Asparagine synthetase [glutamine-hydrolyzing]		1	1		2	0	0	0	0	YES	128.008	138.248	133.128	269.854	320.248	295.051	360.248	374.937	367.592	238.09	193.844	215.967	252.935		0	75.402	9287800000	5157900000	4130000000	8.84783	9.14628	9.21869	8.99585	0.0118473	0.0167269	0.000199257	0.063242	0.48656	-0.533973	-0.942612	-0.730608	0.713725	1.44791	1.92201	1.65934	+	+
	NUTF2	Nuclear transport factor 2	1	1			2	0	0	0	0	YES	322.073	241.279	281.676	374.572	230.481	302.526	255.224	163.649	209.436	234.298	194.184	214.241	251.97		0	20.816	7910200000	3810400000	4099700000	9.10772	9.31752	9.14817	9.08916	0.997883	0.743547	0.48087	0.830108	-0.00913223	0.0514416	0.18916	0.0799754	1.00635	0.964972	0.877116	0.946074
	BLVRB	Flavin reductase (NADPH)			1	1	2	0	0	0	0	YES	159.13	325.591	242.361	203.25	199.505	201.378	212.78	312.872	262.826	311.872	286.295	299.083	251.412		0	68.122	8346100000	4401000000	3945100000	9.11039	9.00796	9.16634	9.18837	0.497321	0.218562	0.0779089	0.0673712	-0.120859	-0.274582	-0.449434	-0.55277	1.08738	1.20964	1.3655	1.4669
	TBCA	Tubulin-specific chaperone A		1	1		2	0	0	0	0	YES	198.308	215.482	206.895	275.641	266.654	271.148	320.883	283.062	301.972	218.038	226.305	222.172	250.547		0	21.63	7025400000	3400300000	3625100000	9.02379	9.09902	9.24237	9.14448	0.749085	0.157891	0.876386	0.446461	0.0550568	-0.315163	-0.0443598	0.228357	0.962557	1.24415	1.03123	0.853607
	UBE2N;UBE2NL	Ubiquitin-conjugating enzyme E2 N;Putative ubiquitin-conjugating enzyme E2 N-like		1		1	2	0	0	0	0	YES	206.658	195.093	200.876	368.056	336.524	352.29	117.293	149.629	133.461	231.014	359.462	295.238	245.466		0	22.912	7706800000	3738800000	3968000000	8.99718	9.17661	8.91899	9.25445	0.633698	0.881634	0.854474	0.986697	0.0858326	-0.0332299	0.0391384	-0.00689809	0.942241	1.0233	0.973236	1.00479
	CTH	Cystathionine gamma-lyase	1	1			2	0	0	0	0	YES	253.883	314.358	284.12	242.822	311.245	277.034	242.461	212.587	227.524	210.876	172.802	191.839	245.129		0	180.47	9612400000	4112600000	5499800000	9.29323	9.2204	9.12833	9.17184	0.0673352	0.859289	0.839595	0.0835362	0.330788	-0.0406157	0.0446039	0.521453	0.795102	1.02855	0.969556	0.69667
	SDHA	Succinate dehydrogenase [ubiquinone] flavoprotein subunit, mitochondrial	1		1		2	0	0	0	0	YES	417.63	501.981	459.805	90.4271	139.834	115.131	225.291	312.588	268.939	164.379	108.306	136.342	245.054		0	107.8	7907400000	4133300000	3774100000	9.30782	8.84831	9.21796	9.0214	0.000225292	0.114738	0.983537	0.250764	-0.614182	0.370834	-0.000346329	0.389897	1.53069	0.773335	1.00024	0.763184	+
	ARF4	ADP-ribosylation factor 4			1	1	2	0	0	0	0	YES	280.277	147.563	213.92	162.688	62.9366	112.812	335.161	305.574	320.367	337.126	325.053	331.089	244.547		0	15.573	5555000000	2949400000	2605600000	9.03463	8.71635	9.22209	9.18862	0.162455	0.048995	0.128591	0.0530986	-0.322253	-0.439344	-0.388129	-0.584371	1.25028	1.35599	1.30869	1.49939		+
	BZW1	Basic leucine zipper and W2 domain-containing protein 1	1	1			2	0	0	0	0	YES	314.241	332.707	323.474	299.042	282.974	291.008	177.879	191.438	184.659	157.585	184.182	170.884	242.506		0	94.095	8114100000	3411000000	4703100000	9.2199	9.27388	9.13123	9.06141	0.32434	0.000500913	0.175787	0.408641	0.173767	0.623492	0.375846	0.282973	0.886525	0.649098	0.770653	0.821895		+
	HMGB1;HMGB1P1	High mobility group protein B1;Putative high mobility group protein B1-like 1		1		1	2	0	0	0	0	YES	92.3564	151.808	122.082	330.617	480.001	405.309	219.432	138.953	179.193	271.322	245.518	258.42	241.251		0	84.264	9560100000	3621000000	5939100000	9.0936	9.44911	9.1852	9.23004	8.8275e-14	0.0488475	0.00184343	0.26623	1.37801	0.349479	0.721329	0.334339	0.384749	0.784868	0.606538	0.793147	+	+
	OGDH	2-oxoglutarate dehydrogenase, mitochondrial	1			1	2	0	0	0	0	YES	282.147	340.639	311.393	171.698	161.33	166.514	264.615	214.843	239.729	259.278	234.161	246.72	241.089		0	105.2	8583000000	4137600000	4445400000	9.18159	9.05748	9.19524	9.18193	0.54952	0.437138	0.346102	0.888448	-0.10771	0.182692	0.214622	0.0405417	1.07752	0.881057	0.861772	0.97229
	TES	Testin			1	1	2	0	0	0	0	YES	122.603	172.476	147.54	146.57	152.642	149.606	325.858	235.797	280.828	461.801	285.78	373.791	237.941		0	117.49	6723400000	3622400000	3101000000	8.87457	8.93982	9.16761	9.23421	0.739466	0.146937	0.0290851	0.00601477	0.0575542	-0.323696	-0.555121	-0.829178	0.960892	1.25153	1.46929	1.77667
	EIF4G2	Eukaryotic translation initiation factor 4 gamma 2	1			1	2	0	0	0	0	YES	244.49	299.816	272.153	210.219	260.32	235.269	204.911	173.318	189.115	246.749	260.224	253.486	237.506		0	42.462	7421100000	3573100000	3848000000	9.17777	9.16953	9.11039	9.16667	0.528393	0.801623	0.602839	0.698909	0.107688	-0.0560711	0.13606	-0.118367	0.928074	1.03963	0.910001	1.08551
	PPIF	Peptidyl-prolyl cis-trans isomerase F, mitochondrial;Peptidyl-prolyl cis-trans isomerase			1	1	2	0	0	0	0	YES	286.024	127.272	206.648	99.783	117.539	108.661	339.609	404.252	371.931	236.014	256.653	246.333	233.393		0	85.849	6250900000	3105900000	3145000000	8.96557	8.78695	9.31752	9.14959	0.373137	0.536442	0.271602	0.838774	-0.208278	-0.137965	-0.282211	-0.0631529	1.15531	1.10035	1.21606	1.04475
	ZYX	Zyxin			1	1	2	0	0	0	0	YES	181.155	172.982	177.069	77.0649	179.725	128.395	297.53	264.658	281.094	295.785	377.709	336.747	230.826		0	136.78	6710400000	3723100000	2987200000	8.90179	8.92213	9.17935	9.2316	0.0388748	0.0550238	0.332467	0.0491685	-0.472789	-0.428197	-0.249393	-0.594313	1.38779	1.34555	1.18871	1.50975	+
	ANXA7	Annexin A7			1	1	2	0	0	0	0	YES	127.514	160.359	143.937	88.2321	158.698	123.465	297.789	270.267	284.028	373.806	358.314	366.06	229.373		0	76.656	7683300000	3393700000	4289600000	8.89595	8.91433	9.28355	9.32652	0.623393	0.940686	0.566874	0.804517	0.0886844	0.0174944	0.128425	-0.0764173	0.94038	0.987947	0.914829	1.0544
	PSMD1	26S proteasome non-ATPase regulatory subunit 1			1	1	2	0	0	0	0	YES	166.971	257.37	212.17	180.793	173.713	177.253	254.057	269.082	261.569	243.011	287.34	265.176	229.042		0	187.49	7124100000	3597400000	3526800000	9.01013	8.95906	9.17843	9.15109	0.827417	0.759257	0.565116	0.594747	-0.0568514	-0.0683926	-0.150129	-0.162089	1.04019	1.04855	1.10967	1.11891
	PABPC4	Polyadenylate-binding protein 4	1	1			2	0	0	0	0	YES	227.687	326.702	277.194	242.799	264.169	253.484	264.21	150.53	207.37	187.557	163.607	175.582	228.408		0	43.583	8156700000	3859600000	4297100000	9.21632	9.13491	9.14839	9.12795	0.314333	0.897574	0.424775	0.538035	0.177599	0.0302654	0.215989	0.184344	0.884173	0.97924	0.860956	0.880049
	ANXA11	Annexin A11	1			1	2	0	0	0	0	YES	411.174	167.438	289.306	44.3993	131.256	87.8277	262.622	89.5858	176.104	359.427	357.015	358.221	227.865		0	48	8710700000	4203800000	4506800000	9.31696	8.72567	9.21338	9.31336	0.772247	0.736803	0.46933	0.988502	-0.0570614	0.0790197	0.163628	-0.00621696	1.04034	0.946701	0.892777	1.00432
	USP5	Ubiquitin carboxyl-terminal hydrolase 5			1	1	2	0	0	0	0	YES	179.276	186.874	183.075	183.725	172.708	178.217	266.698	316.834	291.766	192.227	283.468	237.847	222.726		0	87.617	6275200000	2993400000	3281800000	8.96788	8.95272	9.25356	9.13682	0.979945	0.94503	0.928252	0.573106	-0.00283043	0.016211	-0.0278514	-0.17158	1.00196	0.988826	1.01949	1.12629
	HIST1H1B	Histone H1.5		1	1		2	0	0	0	0	YES	196.159	178.013	187.086	312.304	214.821	263.563	298.826	244.557	271.691	168.07	157.969	163.019	221.34		0	16.147	8879000000	3922200000	4956800000	9.05304	9.24237	9.23076	9.10168	0.00158704	0.00742589	0.578008	0.155552	0.612588	0.477781	-0.14535	0.480058	0.654022	0.718081	1.106	0.716949	+	+
	SOD2	Superoxide dismutase [Mn], mitochondrial			1	1	2	0	0	0	0	YES	139.669	171.124	155.396	88.2474	58.2914	73.2694	290.099	233.061	261.58	434.219	347.678	390.949	220.299		0	40.177	5474500000	2824300000	2650200000	8.94192	8.70262	9.20599	9.20621	0.894874	0.13819	0.686182	0.000402171	-0.0375176	0.348572	0.0890913	-1.06761	1.02635	0.785361	0.940115	2.09595
	EIF3B	Eukaryotic translation initiation factor 3 subunit B	1	1			2	0	0	0	0	YES	264.827	283.756	274.292	262.517	267.769	265.143	156.56	173.148	164.854	186.789	152.314	169.552	218.46		0	112.52	7584900000	3764900000	3820100000	9.16322	9.14442	9.07438	9.10782	0.725995	0.911116	0.93556	0.674333	-0.067062	-0.0249128	0.00963388	0.148218	1.04758	1.01742	0.993345	0.902364
	ECH1	Delta(3,5)-Delta(2,4)-dienoyl-CoA isomerase, mitochondrial	1		1		2	0	0	0	0	YES	234.389	255.814	245.101	151.643	130.105	140.874	278.285	264.138	271.212	230.364	202.856	216.61	218.449		0	104.17	8088000000	3549200000	4538900000	9.09258	9.10271	9.29175	9.15767	0.46332	0.317311	0.310468	0.253313	0.126841	0.235114	0.231432	0.343578	0.915835	0.849618	0.851789	0.788084
	CNN2	Calponin-2	1	1			2	0	0	0	0	YES	258.682	308.934	283.808	268.833	320.922	294.878	162.119	102.599	132.359	211.887	113.422	162.655	218.425		0	298.12	7932200000	4028000000	3904200000	9.19659	9.24383	9.02325	9.01242	0.014904	0.347901	0.13137	0.635767	-0.408646	-0.181068	0.420401	0.165944	1.32744	1.13372	0.747217	0.891345	+
	ATP5J	ATP synthase-coupling factor 6, mitochondrial			1	1	2	0	0	0	0	YES	196.461	258.291	227.376	116.998	89.3565	103.177	264.639	283.094	273.867	205.368	265.198	235.283	209.926		0	52.604	6329600000	3363000000	2966500000	9.03842	8.77616	9.21029	9.10833	0.182686	0.101752	0.105009	0.538446	-0.307769	-0.365202	-0.413672	-0.236096	1.23779	1.28806	1.33207	1.1778
	SRSF6	Serine/arginine-rich splicing factor 6	1		1		2	0	0	0	0	YES	445.608	194.814	320.211	0	65.3612	32.6806	150.386	455.552	302.969	158.674	183.849	171.262	206.781		0	6.5982	7363900000	3506400000	3857500000	9.20634	8.2754	9.2444	9.00518	0.595752	1	0.868809	0.68354	0.0890913	NaN	0.0333701	0.144046	0.940115	NaN	0.977135	0.904977
	MARS	Methionine--tRNA ligase, cytoplasmic			1	1	2	0	0	0	0	YES	91.5604	122.377	106.969	180.593	167.811	174.202	297.773	253.267	275.52	275.396	225.474	250.435	201.782		0	76.19	6380800000	2952600000	3428200000	8.78554	8.97529	9.23114	9.1661	0.249662	0.851867	0.837943	0.884035	0.218347	0.0439044	-0.0567013	-0.0458037	0.85955	0.970026	1.04008	1.03226
	HIST2H3A	Histone H3.2		1	1		2	0	0	0	0	YES	34.674	0	17.337	341.408	226.287	283.848	762.697	86.3953	424.546	118.43	33.237	75.8335	200.391		0	55.906	9141700000	3416200000	5725500000	7.97696	9.24859	9.49103	8.77645	1	0.0778726	0.184503	0.0998002	NaN	0.311968	0.304394	0.554933	NaN	0.805542	0.809782	0.680689
	SF3B3	Splicing factor 3B subunit 3	1	1			2	0	0	0	0	YES	233.426	278.99	256.208	274.858	274.829	274.844	146.196	140.609	143.403	129.572	111.046	120.309	198.691		0	111.9	6757900000	3197700000	3560200000	9.17257	9.16929	8.96937	8.975	0.759827	0.8975	0.433864	0.370567	0.0472592	-0.0287489	0.211511	0.305912	0.967773	1.02013	0.863632	0.808931
	ERP44	Endoplasmic reticulum resident protein 44			1	1	2	0	0	0	0	YES	104.057	93.0066	98.5319	132.287	71.4918	101.889	285.513	331.179	308.346	372.442	152.948	262.695	192.866		0	40.568	5079300000	3014200000	2065100000	8.67344	8.66507	9.09255	9.03595	0.482206	0.0250948	0.0006711	0.00132846	-0.165985	-0.499891	-1.13163	-1.26889	1.12193	1.41411	2.19106	2.40975		+
	HNRNPH3	Heterogeneous nuclear ribonucleoprotein H3			1	1	2	0	0	0	0	YES	81.7222	132.205	106.964	128.733	119.665	124.199	255.353	278.248	266.8	222.607	247.347	234.977	183.235		0	38.505	5755600000	2518300000	3237200000	8.74203	8.87388	9.20839	9.1543	0.352336	0.195779	0.712521	0.521309	0.174918	0.304161	0.0807941	0.192068	0.885818	0.809913	0.945537	0.87535
	ADAR	Double-stranded RNA-specific adenosine deaminase			1		1	0	0	0	0	YES	90.7883	90.7026	90.7455	34.9398	58.3039	46.6218	7411.83	45.0218	3728.43	57.9887	53.5147	55.7517	980.387		0	20.297	11363000000	10076000000	1287500000	8.76515	8.51159	9.97846	8.60997	0.911983	0.26893	0.0810209	0.253929	-0.0326543	0.344715	0.401849	0.387362	1.02289	0.787464	0.756888	0.764526
	FABP5	Fatty acid-binding protein, epidermal			1		1	0	0	0	0	YES	178.528	64.5857	121.557	197.924	186.426	192.175	988.66	1036.14	1012.4	87.5726	133.822	110.697	359.208		0	82.072	7758200000	4794300000	2963900000	8.91516	9.01448	9.46795	8.91645	0.815141	0.989209	8.71728e-30	0.470882	0.0381553	-0.00301835	-2.86187	0.248049	0.973899	1.00209	7.26955	0.842034
	YWHAH	14-3-3 protein eta		1			1	0	0	0	0	YES	259.932	199.112	229.522	385.54	374.186	379.863	199.15	215.931	207.541	214.418	231.398	222.908	259.958		0	73.779	10146000000	4716400000	5429900000	9.11291	9.36875	9.1428	9.11863	0.286304	0.141682	0.367281	0.891393	0.188781	0.2587	0.245739	0.0540844	0.877347	0.835841	0.843384	0.963206
	KARS	Lysine--tRNA ligase		1			1	0	0	0	0	YES	128.509	290.548	209.528	363.136	438.322	400.729	198.243	251.222	224.732	235.152	143.777	189.464	256.113		0	86.457	10697000000	5293400000	5403600000	9.08286	9.4432	9.15915	9.06633	0.972233	0.75961	0.908406	0.98212	-0.0153304	-0.0643592	-0.051444	0.016211	1.01068	1.04562	1.0363	0.988826
	TXNDC17	Thioredoxin domain-containing protein 17		1			1	0	0	0	0	YES	315.387	117.784	216.586	340.671	344.926	342.799	215.219	238.216	226.717	221.635	238.398	230.017	254.03		0	40.666	9768300000	4929300000	4839000000	9.14922	9.25113	9.1036	9.0917	0.684429	0.511642	0.539744	0.475608	-0.0762347	-0.128976	-0.215195	-0.275193	1.05426	1.09352	1.16086	1.21016
	ERO1L	ERO1-like protein alpha				1	1	0	0	0	0	YES	53.7845	273.06	163.422	262.992	110.017	186.505	252.444	220.778	236.611	525.969	299.196	412.582	249.78		0	33.564	6657000000	3716100000	2940800000	8.9561	8.97096	9.17073	9.22497	0.947645	0.0695415	0.047928	0.000101596	-0.0225516	-0.405031	-0.50363	-1.17244	1.01575	1.32412	1.41778	2.25393
	ETFB	Electron transfer flavoprotein subunit beta	1				1	0	0	0	0	YES	296.531	294.944	295.737	247.097	168.478	207.788	223.16	281.454	252.307	231.618	217.048	224.333	245.041		0	54.696	8664300000	4430900000	4233400000	9.10721	9.05239	9.19273	9.14239	0.0385617	0.875793	0.964139	0.804099	-0.348684	0.0367495	0.00532815	0.0731348	1.2734	0.974849	0.996314	0.95057	+
	RPS20	40S ribosomal protein S20	1				1	0	0	0	0	YES	383.26	322.842	353.051	281.082	206.111	243.597	257.962	69.2299	163.596	212.945	196.045	204.495	241.185		0	29.924	9810600000	4579500000	5231000000	9.21059	9.14814	9.22917	9.13843	0.320201	0.258911	0.301522	0.129856	-0.172539	0.265437	0.23585	0.456175	1.12704	0.831947	0.849185	0.728916
	EIF3E	Eukaryotic translation initiation factor 3 subunit E		1			1	0	0	0	0	YES	231.587	192.963	212.275	360.573	428.021	394.297	219.635	142.404	181.019	174.879	129.878	152.379	234.992		0	95.149	9040100000	4471200000	4568900000	9.07947	9.34541	9.07831	9.08314	0.710878	0.889258	0.71576	0.808822	-0.0703756	-0.0335991	-0.133322	-0.0875341	1.04999	1.02356	1.09682	1.06255
	PSMC6	26S protease regulatory subunit 10B				1	1	0	0	0	0	YES	193.532	224.169	208.851	168.874	152.173	160.523	251.334	181.217	216.276	389.861	317.688	353.774	234.856		0	66.191	8152500000	3940900000	4211600000	9.02596	8.96472	9.12639	9.28934	0.778274	0.99871	0.924141	0.997856	0.0475383	-0.000360693	-0.0449253	-0.00268594	0.967586	1.00025	1.03163	1.00186
	IMMT	MICOS complex subunit MIC60			1		1	0	0	0	0	YES	238.536	240.471	239.504	143.446	318.349	230.898	278.066	315.121	296.594	173.288	168.383	170.835	234.458		0	145.83	8385800000	4446000000	3939900000	9.11076	9.0812	9.18543	9.00471	0.404835	0.688984	0.0309091	0.757147	-0.146148	0.0941009	-0.54905	-0.114316	1.10661	0.936856	1.46312	1.08246
	MCM2	DNA replication licensing factor MCM2		1			1	0	0	0	0	YES	161.311	292.119	226.715	271.45	396.605	334.028	232.065	236.089	234.077	178.099	103.095	140.597	233.854		0	78.675	9019900000	4128900000	4891000000	9.09363	9.29387	9.1799	9.093	0.322992	0.290553	0.121415	0.145081	0.174279	0.183836	0.356144	0.492315	0.886211	0.880359	0.78125	0.710884
	DDX5	Probable ATP-dependent RNA helicase DDX5	1				1	0	0	0	0	YES	284.44	312.069	298.255	197.924	244.308	221.116	244.382	167.895	206.138	218.454	197.502	207.978	233.372		0	36.585	7408700000	3443600000	3965100000	9.15528	9.12756	9.17944	9.16708	0.367807	0.233282	0.256048	0.0885316	-0.157222	0.280244	0.259785	0.513188	1.11514	0.823452	0.835213	0.700673
	PPME1	Protein phosphatase methylesterase 1	1				1	0	0	0	0	YES	243.511	378.795	311.153	130.276	207.87	169.073	220.21	271.647	245.929	167.082	244.362	205.722	232.969		0	49.902	8552700000	4048600000	4504100000	9.24832	9.1036	9.17702	9.12772	0.0774947	0.620251	0.977422	0.935539	-0.298957	0.116498	0.00144204	-0.0262344	1.23025	0.922424	0.999001	1.01835
	NAMPT	Nicotinamide phosphoribosyltransferase				1	1	0	0	0	0	YES	189.099	182.848	185.973	119.024	151.755	135.39	313.363	143.532	228.448	371.29	385.961	378.626	232.109		0	138.24	6836400000	3175300000	3661100000	9.04179	8.88673	9.29265	9.30343	0.835787	0.646936	0.762624	0.313376	0.0329472	0.107688	0.0652966	-0.305503	0.977422	0.928074	0.955749	1.23585
	MTAP	S-methyl-5-thioadenosine phosphorylase;Purine nucleoside phosphorylase		1			1	0	0	0	0	YES	120.964	83.647	102.305	385.793	438.542	412.167	200.05	237.201	218.625	329.416	58.4493	193.933	231.758		0	105.75	10228000000	4538900000	5689000000	8.8562	9.40521	9.16732	9.09653	0.0935927	0.0848251	0.228352	0.569573	0.321582	0.304745	0.275842	0.197488	0.800192	0.809585	0.825968	0.872068
	RPL9	60S ribosomal protein L9	1				1	0	0	0	0	YES	293.912	294.204	294.058	232.377	217.123	224.75	139.082	217.685	178.383	207.139	225.284	216.211	228.351		0	41.913	7459400000	3524200000	3935200000	9.14251	9.09802	9.09854	9.13014	0.762937	0.621407	0.15531	0.411979	-0.059059	-0.110215	0.395172	0.246226	1.04179	1.07939	0.760399	0.843099
	SSR4	Translocon-associated protein subunit delta		1			1	0	0	0	0	YES	171.229	151.589	161.409	335.33	325.526	330.428	217.957	200.734	209.346	221.016	191.935	206.475	226.915		0	17.687	7745200000	3997700000	3747600000	8.82433	9.20917	9.02812	8.95855	0.165754	0.373153	0.103185	0.0577433	-0.319802	-0.172197	-0.549303	-0.746591	1.24816	1.12677	1.46338	1.67782
	PYCR1	Pyrroline-5-carboxylate reductase 1, mitochondrial;Pyrroline-5-carboxylate reductase	1				1	0	0	0	0	YES	249.552	275.069	262.311	191.676	227.057	209.367	258.554	149.296	203.925	196.513	250.745	223.629	224.808		0	82.54	8181200000	4095700000	4085400000	9.0992	9.158	9.12339	9.12352	0.912676	0.607546	0.558402	0.616575	0.0107799	0.12075	-0.205996	-0.190536	0.992556	0.919709	1.15348	1.14119
	RAC1;RAC3;RAC2	Ras-related C3 botulinum toxin substrate 1;Ras-related C3 botulinum toxin substrate 3;Ras-related C3 botulinum toxin substrate 2		1			1	0	0	0	0	YES	189.903	248.116	219.009	195.959	340.791	268.375	277.345	147.185	212.265	166.643	227.343	196.993	224.161		0	12.317	5859800000	2982800000	2877000000	9.09381	9.10802	9.08443	9.06036	0.453859	0.395118	0.417003	0.534926	0.129745	-0.189779	-0.280422	-0.238221	0.913993	1.14059	1.21455	1.17954
	SNRNP200	U5 small nuclear ribonucleoprotein 200 kDa helicase			1		1	0	0	0	0	YES	208.934	273.626	241.28	100.704	125.816	113.26	326.11	310.518	318.314	291.224	152.544	221.884	223.685		0	144.79	8668000000	3733800000	4934200000	9.11754	8.88765	9.34741	9.29949	0.688318	0.348969	0.874617	0.340444	-0.075368	0.220206	-0.0449253	0.286408	1.05363	0.858443	1.03163	0.819941
	BOLA2	BolA-like protein 2		1			1	0	0	0	0	YES	298.998	171.252	235.125	266.124	240.041	253.082	235.647	220.104	227.875	209.043	140.435	174.739	222.706		0	40.658	7177100000	3654600000	3522500000	9.11032	9.11883	9.07649	8.98165	0.239642	0.230195	0.369777	0.892245	-0.20234	-0.267774	-0.308448	-0.0451486	1.15056	1.20395	1.23837	1.03179
	RPL35A	60S ribosomal protein L35a		1			1	0	0	0	0	YES	224.05	230.515	227.282	394.826	315.981	355.404	101.662	112.309	106.985	210.876	189.385	200.131	222.45		0	13.434	8089500000	3697500000	4391900000	9.0924	9.24536	8.99662	9.10332	0.24513	0.105732	0.0032123	0.667476	0.206643	-0.306323	0.834064	0.151339	0.866551	1.23655	0.560947	0.900414
	RPL36AL	60S ribosomal protein L36a-like		1			1	0	0	0	0	YES	145.559	159.967	152.763	291.421	263.355	277.388	165.441	277.298	221.369	187.001	281.322	234.161	221.42		0	12.431	7642900000	3704600000	3938300000	8.89618	9.15448	9.18636	9.1345	1	0.301931	0.341114	0.451755	-0.00776818	-0.230381	-0.245061	-0.228503	1.0054	1.17314	1.18514	1.17162
	COPS4	COP9 signalosome complex subunit 4		1			1	0	0	0	0	YES	140.664	338.048	239.356	290.553	379.486	335.02	214.619	124.56	169.589	118.516	156.686	137.601	220.391		0	154.45	7445700000	3520300000	3925400000	9.07875	9.33702	9.00937	9.02239	0.619763	0.394629	0.812425	0.555284	0.0827026	0.146525	0.0546401	0.204516	0.944287	0.903424	0.962835	0.86783
	LARS	Leucine--tRNA ligase, cytoplasmic		1			1	0	0	0	0	YES	325.034	154.278	239.656	240.789	343.313	292.051	159.04	145.667	152.353	214.747	173.736	194.242	219.576		0	58.236	8970000000	4214100000	4755900000	9.21061	9.24878	9.1214	9.11093	0.889109	0.765217	0.284982	0.445067	-0.0324772	-0.0630022	0.293959	0.262193	1.02277	1.04464	0.815661	0.83382
	EIF3L	Eukaryotic translation initiation factor 3 subunit L		1			1	0	0	0	0	YES	314.989	121.41	218.2	138.273	469.803	304.038	220.259	176.143	198.201	197.736	117.112	157.424	219.466		0	83.394	8613100000	4430400000	4182700000	9.01326	9.41027	9.07011	8.99632	0.681428	0.206425	0.671076	0.87095	-0.10019	-0.240981	-0.153222	-0.0558912	1.07191	1.1818	1.11205	1.0395
	PIR	Pirin			1		1	0	0	0	0	YES	148.202	145.236	146.719	209.989	259.484	234.736	234.828	325.318	280.073	219.433	211.48	215.457	219.246		0	41.397	6020700000	2988200000	3032600000	8.87709	9.07983	9.15854	9.0876	0.669722	0.510344	0.281322	0.94362	0.0760118	-0.146915	-0.367769	0.032242	0.948677	1.1072	1.29036	0.977899
	STAT3	Signal transducer and activator of transcription 3;Signal transducer and activator of transcription	1				1	0	0	0	0	YES	308.064	388.948	348.506	134.85	85.8667	110.358	215.543	219.52	217.531	216.871	182.265	199.568	218.991		0	148.93	7541600000	3534200000	4007500000	9.24025	8.87475	9.22861	9.19791	0.0378722	0.0264184	0.171952	0.282401	-0.349897	0.521955	0.313478	0.323197	1.27447	0.696427	0.804699	0.799297	+	+
	APOA1BP	NAD(P)H-hydrate epimerase			1		1	0	0	0	0	YES	103.58	265.891	184.735	174.453	171.572	173.013	234.966	354.138	294.552	197.101	249.85	223.475	218.944		0	47.59	5945600000	2892400000	3053200000	9.10995	8.93542	9.24795	9.11657	0.714323	0.566659	0.320598	0.698733	-0.0696184	-0.127873	-0.25546	-0.145286	1.04944	1.09268	1.19372	1.10595
	DDX39B	Spliceosome RNA helicase DDX39B			1		1	0	0	0	0	YES	226.262	249.347	237.805	113.122	138.771	125.947	363.919	231.933	297.926	277.7	149.954	213.827	218.876		0	77.515	7357700000	3593800000	3763800000	9.09184	8.81902	9.30784	9.16569	0.226606	0.442042	0.72512	0.516981	0.215368	-0.171563	-0.0937713	0.194087	0.861326	1.12628	1.06716	0.874126
	ABRACL	Costars family protein ABRACL	1				1	0	0	0	0	YES	280.683	339.967	310.325	131.588	293.363	212.476	202.545	215.42	208.983	29.9225	241.835	135.879	216.916		0	30.6	6416700000	2830100000	3586600000	9.34706	9.08472	9.11381	8.88563	0.382264	0.862627	0.803459	0.229849	-0.152821	0.040682	0.0579701	-0.46919	1.11174	0.972195	0.960615	1.38433
	CSDE1	Cold shock domain-containing protein E1	1				1	0	0	0	0	YES	328.783	183.551	256.167	249.576	225.092	237.334	222.884	157.837	190.36	150.274	213.65	181.962	216.456		0	130.83	7625700000	4089300000	3536400000	9.09205	9.0864	9.10302	9.10829	0.0335063	0.306926	0.329051	0.923398	-0.358047	-0.228013	-0.334462	0.040682	1.28169	1.17122	1.26091	0.972195	+
	RAB10	Ras-related protein Rab-10		1			1	0	0	0	0	YES	207.533	204.03	205.782	240.942	297.088	269.015	162.686	209.518	186.102	169.12	234.28	201.7	215.65		0	16.353	5697500000	2890100000	2807400000	8.9837	9.16256	8.96821	9.05227	0.983061	0.975098	0.77587	0.925134	-0.0125482	0.00733906	-0.107213	-0.0286312	1.00874	0.994926	1.07715	1.02004
	MCM4	DNA replication licensing factor MCM4	1				1	0	0	0	0	YES	346.916	224.864	285.89	206.274	237.534	221.904	108.128	281.016	194.572	110.398	204.931	157.665	215.008		0	142.19	8584300000	3867600000	4716700000	9.21777	9.09882	9.19745	9.09346	0.411679	0.507336	0.134916	0.236731	0.143132	0.155879	0.343578	0.401412	0.905551	0.897586	0.788084	0.757117
	RAB11B;RAB11A	Ras-related protein Rab-11B;Ras-related protein Rab-11A		1			1	0	0	0	0	YES	198.762	225.582	212.172	255.594	262.71	259.152	155.337	257.643	206.49	149.671	189.955	169.813	211.907		0	27.419	6931100000	3374600000	3556500000	8.99183	9.12992	9.02444	8.9198	0.595887	0.904283	0.492389	0.408345	-0.127163	-0.0268369	-0.239294	-0.320342	1.09214	1.01878	1.18041	1.24863
	GLUD1;GLUD2	Glutamate dehydrogenase 1, mitochondrial;Glutamate dehydrogenase 2, mitochondrial				1	1	0	0	0	0	YES	169.629	158.765	164.197	108.364	237.702	173.033	202.011	239.426	220.718	336.311	219.336	277.824	208.943		0	82.751	6615300000	3358900000	3256400000	8.91582	9.02391	9.06558	9.18007	0.88163	0.733739	0.220923	0.00890281	0.0214797	0.0799754	-0.416	-0.789661	0.985222	0.946074	1.33422	1.72867
	IDH3A	Isocitrate dehydrogenase [NAD] subunit alpha, mitochondrial		1			1	0	0	0	0	YES	224.089	224.162	224.126	258.541	302.073	280.307	179.095	176.249	177.672	159.16	136.372	147.766	207.468		0	61.316	6481800000	3437900000	3043800000	8.99961	9.15812	8.97719	8.93377	0.29878	0.729988	0.429533	0.785776	-0.241697	-0.0770258	-0.273308	-0.0994172	1.18238	1.05484	1.20858	1.07134
	DLST	Dihydrolipoyllysine-residue succinyltransferase component of 2-oxoglutarate dehydrogenase complex, mitochondrial	1				1	0	0	0	0	YES	217.324	336.061	276.692	91.4019	204.021	147.712	209.984	157.333	183.659	218.054	223.066	220.56	207.156		0	81.442	7328700000	3453600000	3875100000	9.20112	9.07302	9.10285	9.10006	0.89103	0.743828	0.51594	0.946283	-0.0320789	0.0768327	0.173255	-0.0180451	1.02248	0.948137	0.886839	1.01259
	GML;TXNRD1	Thioredoxin reductase 1, cytoplasmic			1		1	0	0	0	0	YES	133.898	136.979	135.439	218.807	183.889	201.348	211.418	380.263	295.84	225.835	161.818	193.826	206.613		0	82.583	6256100000	3020400000	3235600000	8.86235	9.09367	9.21698	9.02694	0.0657585	0.756265	0.271268	0.98848	0.353662	-0.0692702	-0.282404	0.00302647	0.782595	1.04919	1.21622	0.997904
	H2AFY	Core histone macro-H2A.1;Histone H2A		1			1	0	0	0	0	YES	231.404	188	209.702	325.053	228.604	276.828	196.646	103.354	150	162.146	214.466	188.306	206.209		0	74.647	6719300000	3178000000	3541300000	9.01263	9.33013	9.09174	9.03651	0.938112	0.590287	0.123082	0.334799	0.00748262	0.0897694	0.429964	0.328836	0.994827	0.939673	0.74228	0.796178
	PSMB5	Proteasome subunit beta type-5		1			1	0	0	0	0	YES	102.123	71.5	86.8115	339.865	300.585	320.225	258.092	189.977	224.035	166.745	212.264	189.505	205.144		0	51.229	7665400000	3594400000	4071000000	8.66117	9.26651	9.18273	9.08486	0.524755	0.770452	0.232325	0.422183	0.117163	0.0450235	0.273456	0.275126	0.921999	0.969274	0.827335	0.826378
	RPL38	60S ribosomal protein L38		1			1	0	0	0	0	YES	177.239	210.489	193.864	375.148	394.611	384.879	34.0355	121.767	77.9011	147.783	150.572	149.177	201.455		0	3.1718	6401700000	3135200000	3266500000	8.98985	9.28312	8.69832	8.94695	0.874787	0.675274	0.678353	0.92743	0.0231843	-0.0851906	0.105678	0.038998	0.984058	1.06083	0.929368	0.973331
	APRT	Adenine phosphoribosyltransferase		1			1	0	0	0	0	YES	84.739	211.342	148.041	631.931	249.528	440.729	163.164	66.9981	115.081	105.258	97.7494	101.504	201.339		0	42.365	7605500000	3809800000	3795700000	9.04056	9.3296	8.88532	8.86714	0.400692	0.428068	0.238143	0.0573422	0.157303	-0.154105	0.325732	0.63951	0.8967	1.11273	0.797894	0.641931
	PSMD13	26S proteasome non-ATPase regulatory subunit 13			1		1	0	0	0	0	YES	215.692	239.111	227.402	108.172	95.3023	101.737	276.113	244.613	260.363	194.202	235.714	214.958	201.115		0	42.154	6267400000	3029000000	3238400000	9.04879	8.74284	9.21906	9.11391	0.607389	0.385829	0.972786	0.822037	0.0931545	-0.193536	-0.0137566	-0.0807591	0.937471	1.14356	1.00958	1.05757
	RPL37A	60S ribosomal protein L37a		1			1	0	0	0	0	YES	136.381	145.281	140.831	304.169	267.747	285.958	168.164	172.466	170.315	192.039	208.138	200.089	199.298		0	25.814	6878500000	3324000000	3554500000	8.86299	9.22958	9.03846	9.03647	0.55667	0.129996	0.415826	0.712099	0.107688	-0.287219	0.220454	-0.138124	0.928074	1.22029	0.858295	1.10047
	RCN3	Reticulocalbin-3				1	1	0	0	0	0	YES	62.4383	166.395	114.417	126.469	167.246	146.858	145.337	362.889	254.113	161.84	378.168	270.004	196.348		0	111.58	5992600000	3012000000	2980600000	8.68259	8.97622	9.20596	9.16382	0.752404	0.615469	0.941784	0.226149	-0.0787922	0.118094	-0.023563	-0.366392	1.05613	0.921404	1.01647	1.28912
	ADH5	Alcohol dehydrogenase class-3	1				1	0	0	0	0	YES	292.376	280.41	286.393	144.267	100.794	122.531	300.723	120.2	210.461	142.47	181.054	161.762	195.287		0	89.143	7063700000	3141500000	3922200000	9.20006	8.90732	9.1887	9.02288	0.128501	0.26281	0.126139	0.558071	0.273218	0.263275	0.351628	0.203139	0.827472	0.833194	0.783699	0.868659
	ACACA	Acetyl-CoA carboxylase 1;Biotin carboxylase		1			1	0	0	0	0	YES	174.461	171.676	173.068	277.775	242.468	260.121	271.867	141.778	206.823	177.057	94.8588	135.958	193.993		0	187.94	7457800000	3084100000	4373700000	9.03894	9.19695	9.2017	9.04383	0.112006	0.19726	0.0335758	0.00686308	0.304394	0.226015	0.49057	0.90589	0.809782	0.854993	0.711744	0.533703
	CPNE3	Copine-3		1			1	0	0	0	0	YES	143.641	181.617	162.629	238.225	284.969	261.597	237.016	98.2237	167.62	235.794	123.385	179.589	192.859		0	42.42	8436200000	3479200000	4957000000	8.98428	9.32697	9.11381	9.13934	0.00714078	0.0154684	0.128994	0.240918	0.520648	0.431356	0.423094	0.352758	0.697058	0.741565	0.745823	0.783085	+	+
	ATP1B1	Sodium/potassium-transporting ATPase subunit beta-1			1		1	0	0	0	0	YES	210.176	220.808	215.492	111.226	96.556	103.891	248.052	277.152	262.602	193.003	176.651	184.827	191.703		0	17.962	5524100000	2744200000	2779800000	9.03242	8.84468	9.09954	9.02971	0.172512	0.506808	0.0473337	0.388155	-0.314894	-0.148145	-0.665569	-0.334735	1.24392	1.10814	1.58619	1.26115
	SMS	Spermine synthase		1			1	0	0	0	0	YES	228.236	124.976	176.606	276.516	227.358	251.937	221.426	63.7581	142.592	278.405	109.827	194.116	191.313		0	29.427	5092500000	2391200000	2701300000	9.01895	9.13852	9.06599	9.07958	0.647581	0.883617	0.86792	0.741129	0.0820213	-0.0326691	0.0342158	-0.122727	0.944733	1.0229	0.976562	1.08879
	GRPEL1	GrpE protein homolog 1, mitochondrial	1				1	0	0	0	0	YES	235.687	309.35	272.518	129.946	151.124	140.535	151.552	301.369	226.461	175.803	74.2493	125.026	191.135		0	25.77	6389400000	3311900000	3077500000	9.12103	9.02325	9.13938	8.85286	0.301407	0.630284	0.317553	0.404606	-0.178992	0.113167	-0.342177	-0.322974	1.13209	0.924556	1.26767	1.25091
	G3BP2	Ras GTPase-activating protein-binding protein 2		1			1	0	0	0	0	YES	170.664	108.538	139.601	286.301	279.88	283.091	188.146	129.942	159.044	161.096	201.826	181.461	190.799		0	39.726	7230300000	3751700000	3478600000	8.86877	9.13309	9.00381	9.02637	0.451498	0.057511	0.748809	0.755864	-0.177278	-0.423894	-0.118884	-0.114988	1.13075	1.34154	1.08589	1.08297
	ALDH7A1	Alpha-aminoadipic semialdehyde dehydrogenase	1				1	0	0	0	0	YES	271.306	223.293	247.3	205.077	97.7877	151.432	286.55	177.808	232.179	150.22	107.118	128.669	189.895		0	125.42	7159900000	3376200000	3783700000	9.10075	9.01381	9.19226	9.02197	0.274802	0.172309	0.164589	0.285463	0.193582	0.320889	0.31904	0.363227	0.874432	0.800576	0.801603	0.777424
	ISYNA1;PFKM	Inositol-3-phosphate synthase 1	1				1	0	0	0	0	YES	276.719	245.48	261.099	278.488	178.295	228.392	100.422	199.216	149.819	30.5439	184.562	107.553	186.716		0	43.325	5170200000	2746300000	2423900000	9.05346	9.14517	8.92812	8.80989	0.119989	0.739174	0.759799	0.628881	-0.264443	-0.0743043	-0.114129	0.169155	1.20117	1.05285	1.08232	0.889363
	ACO2	Aconitate hydratase, mitochondrial		1			1	0	0	0	0	YES	195.928	182.954	189.441	228.324	323.928	276.126	108.89	149.069	128.979	123.014	168.201	145.607	185.038		0	46.6	6267600000	3076800000	3190800000	9.02197	9.22577	8.9096	8.91207	0.833546	0.900329	0.802659	0.594849	0.0335111	-0.0310171	-0.0957742	-0.202921	0.97704	1.02173	1.06864	1.15103
	SEC22B	Vesicle-trafficking protein SEC22b		1			1	0	0	0	0	YES	87.4055	97.9848	92.6951	338.492	405.469	371.98	138.182	163.081	150.632	87.0633	152.591	119.827	183.784		0	42.296	6397100000	3606400000	2790700000	8.62609	9.21519	8.87604	8.78527	0.0399367	0.00733149	0.138434	0.124055	-0.470289	-0.502546	-0.500667	-0.603424	1.38539	1.41671	1.41487	1.51932	+	+
	EIF5	Eukaryotic translation initiation factor 5				1	1	0	0	0	0	YES	209.3	162.686	185.993	151.628	123.815	137.721	188.681	136.29	162.486	206.089	284.363	245.226	182.856		0	65.686	6291800000	3210700000	3081100000	8.95544	8.85138	8.9843	9.23137	0.553472	0.0142031	0.0778972	0.175368	0.108625	-0.547236	-0.593159	-0.410006	0.927472	1.46128	1.50855	1.32869		+
	MAP4	Microtubule-associated protein;Microtubule-associated protein 4	1				1	0	0	0	0	YES	242.245	251.644	246.945	143.738	192.929	168.333	184.224	156.887	170.555	174.832	111.339	143.085	182.23		0	63.963	5584100000	3098400000	2485700000	9.01862	8.92031	8.97127	8.89056	0.0446284	0.0497244	0.181611	0.263227	-0.459873	-0.437936	-0.452728	-0.436569	1.37542	1.35466	1.36863	1.35338	+	+
	MRPL12	39S ribosomal protein L12, mitochondrial	1				1	0	0	0	0	YES	324.533	273.959	299.246	63.0841	106.549	84.8165	164.931	194.377	179.654	148.927	159.972	154.45	179.541		0	21.578	6874100000	3591300000	3282700000	9.14295	8.76403	9.03822	8.9785	0.228675	0.787038	0.675847	0.588302	-0.206911	-0.0602919	-0.151074	0.188401	1.15421	1.04268	1.1104	0.877578
	TWF1	Twinfilin-1				1	1	0	0	0	0	YES	92.7942	131.616	112.205	104.472	126.315	115.394	198.542	279.214	238.878	238.748	261.871	250.31	179.197		0	73.179	5957000000	2786300000	3170600000	8.86723	8.87338	9.16965	9.19656	0.840277	0.833741	0.858367	0.824224	0.0318186	0.049352	0.0364681	-0.0687708	0.978186	0.96637	0.975039	1.04882
	HARS	Histidine--tRNA ligase, cytoplasmic				1	1	0	0	0	0	YES	53.0275	117.225	85.1264	64.0849	71.0394	67.5622	254.324	207.764	231.044	347.282	307.646	327.464	177.799		0	75.976	4991600000	2169900000	2821700000	8.62605	8.63272	9.18067	9.26926	0.929404	0.799857	0.769397	0.615933	0.00963388	-0.0565812	0.0632269	-0.152949	0.993345	1.04	0.957121	1.11184
	SEPT2	Septin-2				1	1	0	0	0	0	YES	75.602	157.134	116.368	101.272	294.873	198.073	124.285	116.823	120.554	237.283	312.556	274.919	177.479		0	114.39	5732700000	2621600000	3111100000	8.78733	9.2244	8.90085	9.16221	0.61512	0.244987	0.522288	0.943448	0.0909888	0.203013	0.170438	-0.0232405	0.938879	0.868734	0.888573	1.01624
	ROCK2	Rho-associated protein kinase 2		1			1	0	0	0	0	YES	104.36	126.857	115.608	283.677	279.001	281.339	164.056	126.475	145.265	136.468	196.212	166.34	177.138		0	88.668	6436200000	3129100000	3307100000	8.91572	9.18261	8.9595	9.00428	0.709618	0.000621477	0.721766	0.907567	-0.0916021	-0.639175	-0.130681	-0.0374435	1.06555	1.55744	1.09481	1.02629		+
	S100P	Protein S100-P			1		1	0	0	0	0	YES	154.944	142.796	148.87	61.784	48.4598	55.1219	289.313	277.371	283.342	209.278	232.38	220.829	177.041		0	25.265	6091400000	3061300000	3030100000	8.87214	8.44934	9.12956	9.04364	0.431762	0.717517	0.0745765	0.331727	0.146655	-0.0665482	-0.599746	-0.377594	0.903342	1.04721	1.51545	1.29917
	RPS13	40S ribosomal protein S13	1				1	0	0	0	0	YES	216.241	288.16	252.201	133.215	123.661	128.438	172.977	130.478	151.727	160.618	186.692	173.655	176.505		0	26.8	4990300000	2148100000	2842200000	9.07525	8.87271	9.07302	9.06577	0.738058	0.357999	0.0118181	0.188248	-0.0644347	0.216113	0.710614	0.445409	1.04568	0.860882	0.61106	0.734376
	CLTA	Clathrin light chain A				1	1	0	0	0	0	YES	135.928	145.787	140.858	74.6542	176.213	125.434	202.845	196.123	199.484	276.948	197.352	237.15	175.731		0	60.504	6456400000	3182600000	3273800000	8.86427	8.86574	9.13906	9.13802	0.851535	0.696565	0.632476	0.721604	-0.0499049	-0.0870283	-0.170832	-0.109188	1.0352	1.06218	1.12571	1.07862
	SNRPD2	Small nuclear ribonucleoprotein Sm D2		1			1	0	0	0	0	YES	82.9878	197.367	140.177	297.3	323.95	310.625	235.403	86.4927	160.948	170.412	8.82382	89.6181	175.342		0	50.711	4888800000	2372500000	2516300000	8.7932	9.24	8.98659	8.74958	0.6024	0.355385	0.614999	0.371696	-0.125054	0.159758	0.131063	0.305212	1.09055	0.895175	0.913159	0.809323
	VAT1	Synaptic vesicle membrane protein VAT-1 homolog		1			1	0	0	0	0	YES	130.794	92.3872	111.59	253.813	269.8	261.806	131.173	132.767	131.97	178.475	175.764	177.12	170.622		0	64.936	5454500000	2736400000	2718100000	8.76335	9.14842	8.91935	8.99672	0.0559653	0.361326	0.832008	0.39494	-0.438073	0.214622	0.0473989	-0.329848	1.35479	0.861772	0.967679	1.25688
	FARSB	Phenylalanine--tRNA ligase beta subunit		1			1	0	0	0	0	YES	164.153	267.213	215.683	256.346	258.084	257.215	102.618	99.7012	101.159	130.975	67.5701	99.2725	168.332		0	41.006	6841400000	3346500000	3495000000	9.13427	9.24832	8.81982	8.96081	0.862436	0.524305	0.315109	0.269386	0.0226164	-0.125368	0.275365	0.37529	0.984446	1.09079	0.826241	0.770951
	U2AF2	Splicing factor U2AF 65 kDa subunit	1				1	0	0	0	0	YES	272.055	236.188	254.121	23.1195	14.6792	18.8993	187.555	220.786	204.17	166.354	210.609	188.481	166.418		0	63.747	4654000000	2053100000	2600900000	9.12159	7.95654	9.12317	9.08257	0.507008	0.455964	0.828604	0.806223	-0.118367	-0.232057	0.0486547	0.0901759	1.08551	1.17451	0.966838	0.939408
	UGGT1	UDP-glucose:glycoprotein glucosyltransferase 1				1	1	0	0	0	0	YES	84.4206	104.67	94.5454	21.3412	34.1077	27.7244	261.706	249.768	255.737	268.72	306.252	287.486	166.373		0	51.38	4127800000	2395800000	1732000000	8.71372	8.22976	9.04696	9.08966	0.421107	0.000589238	0.0019059	0.000637746	-0.188891	-0.92533	-1.03413	-1.3506	1.13989	1.89912	2.04788	2.55017		+
	RPN1	Dolichyl-diphosphooligosaccharide--protein glycosyltransferase subunit 1				1	1	0	0	0	0	YES	119.165	118.653	118.909	140.637	80.4853	110.561	221.369	133.222	177.295	320.405	192.949	256.677	165.861		0	87.163	5229500000	2824900000	2404600000	8.90665	8.79402	8.98132	9.07332	0.0864355	0.0179707	0.00519797	0.00287489	-0.393766	-0.528074	-0.932224	-1.17775	1.31382	1.442	1.90821	2.26224		+
	SRI	Sorcin	1				1	0	0	0	0	YES	272.269	249.158	260.714	115.663	117.847	116.755	142.655	82.6771	112.666	121.172	170.901	146.037	159.043		0	44.559	5325500000	2526600000	2798900000	9.11508	8.87066	8.88036	8.97331	0.898999	0.412932	0.357493	0.293792	-0.0304276	-0.182721	0.251083	0.357158	1.02131	1.13502	0.840266	0.780701
	NANS	Sialic acid synthase				1	1	0	0	0	0	YES	109.796	125.678	117.737	80.9255	106.893	93.9095	184.573	130.137	157.355	280.066	235.262	257.664	156.666		0	66.938	4890600000	2689900000	2200700000	8.78294	8.71229	8.97883	9.09944	0.809041	0.0964393	0.202196	0.0251874	0.0396999	-0.370993	-0.432844	-0.882278	0.972857	1.29324	1.34989	1.84328
	UAP1	UDP-N-acetylhexosamine pyrophosphorylase;UDP-N-acetylgalactosamine pyrophosphorylase;UDP-N-acetylglucosamine pyrophosphorylase				1	1	0	0	0	0	YES	202.686	143.914	173.3	43.763	34.494	39.1285	138.109	138.255	138.182	336.147	162.958	249.552	150.041		0	49.56	4746200000	2392900000	2353200000	8.91429	8.39761	8.91422	9.06767	0.149539	0.988314	0.835853	0.0512778	-0.332226	0.0304067	-0.0817359	-0.767094	1.25895	0.979144	1.05829	1.70184
	ME1	NADP-dependent malic enzyme				1	1	0	0	0	0	YES	48.9346	52.9221	50.9284	35.9905	96.2774	66.134	104.838	139.449	122.143	508.714	162.324	335.519	143.681		0	88.766	5256800000	2662600000	2594200000	8.47891	8.61111	8.87818	9.1438	0.0178141	0.0591306	0.813941	0.000334386	0.457647	0.443713	-0.0909873	-1.08219	0.728173	0.73524	1.0651	2.11725	+
	IDH2	Isocitrate dehydrogenase [NADP], mitochondrial	1				1	0	0	0	0	YES	202.718	289.498	246.108	148.42	114.496	131.458	78.2623	71.0394	74.6508	76.1645	114.586	95.3753	136.898		0	36.009	5448500000	2614700000	2833800000	9.08899	9.02861	8.78626	8.974	0.286845	0.335348	0.263376	0.218083	-0.184179	0.226509	0.308128	0.417488	1.13617	0.854701	0.807689	0.748727
	CAT	Catalase			1		1	0	0	0	0	YES	0	5.31223	2.65611	55.3001	86.4899	70.895	292.06	222.036	257.048	243.199	130.655	186.927	129.382		0	87.11	2909500000	1915700000	993870000	7.09486	8.55311	8.93578	8.80555	1	6.98356e-09	1.44839e-17	1.90868e-10	NaN	-1.58303	-2.81797	-2.52624	NaN	2.99599	7.05169	5.7607		+
	PMPCA	Mitochondrial-processing peptidase subunit alpha			1		1	0	0	0	0	YES	8.58852	47.5964	28.0925	9.71121	40.2977	25.0044	735.438	32.263	383.851	52.0068	58.9427	55.4747	123.106		0	20.844	3615500000	1486700000	2128800000	8.20341	8.17278	9.41857	8.52294	0.560186	2.11695e-06	0.983241	0.964934	0.125387	-1.28993	-0.000259717	-0.00872582	0.916758	2.44517	1.00018	1.00607		+
	EIF1;EIF1B	Eukaryotic translation initiation factor 1;Eukaryotic translation initiation factor 1b		1			1	0	0	0	0	YES	36.1187	25.1674	30.6431	466.074	39.8981	252.986	48.9655	260.834	154.9	52.9291	54.1878	53.5585	123.022		0	99.717	3799800000	2188900000	1610900000	8.1819	8.87281	9.05281	8.39116	0.976668	0.35308	0.462587	0.264054	-0.0253092	-0.207244	-0.255098	-0.483037	1.0177	1.15448	1.19342	1.39768
	RTN4	Reticulon-4;Reticulon				1	1	0	0	0	0	YES	34.1996	81.0484	57.624	96.4444	53.5963	75.0203	120.542	68.3953	94.4686	396.6	90.5586	243.579	117.673		0	27.549	3931000000	2064100000	1866900000	8.58106	8.77282	8.73258	9.03503	0.530101	0.0343696	0.584061	0.667568	-0.149121	0.497433	-0.193585	-0.162186	1.10889	0.708366	1.1436	1.11898		+
	ARG2	Arginase-2, mitochondrial				1	1	0	0	0	0	YES	13.5227	6.39338	9.95805	14.5687	10.2407	12.4047	164.574	33.6415	99.1078	264.849	229.449	247.149	92.155		0	31.789	2586400000	1247800000	1338600000	7.83245	8.05242	8.78898	9.13165	0.0031222	0.778915	1.78766e-06	0.0407466	0.884481	0.119954	-1.58359	-0.618096	0.541682	0.920217	2.99715	1.53485	+
	KRT6B	Keratin, type II cytoskeletal 6B			0		0	1	1	0	1	NO	0	0	0	0	0	0	2074.88	2021.38	2048.13	0	0	0	512.033		0	89.857	5401400000	5087400000	314000000	NaN	NaN	9.72913	NaN	1	1	2.57474e-57	1	NaN	NaN	-4.02625	NaN	NaN	NaN	16.2938	NaN
	CALML5	Calmodulin-like protein 5			0		0	1	1	0	0	NO	0	0	0	0	0	0	1161.99	972.9	1067.44	7.42808	0	3.71404	267.789		0	42.868	2702600000	2664000000	38576000	NaN	NaN	9.42659	6.97679	1	1	5.23759e-143	1	NaN	NaN	-6.42167	NaN	NaN	NaN	85.7265	NaN
	PSMC4	26S protease regulatory subunit 6B					0	0	0	0	0	YES	142.837	255.662	199.25	222.238	207.87	215.054	264.218	241.561	252.889	260.775	163.552	212.163	219.839		0	181.36	8441700000	3725800000	4715900000	9.02301	9.0484	9.27646	9.24912	0.604504	0.969693	0.294817	0.570024	0.0939657	-0.00847902	-0.269164	-0.172945	0.936944	1.00589	1.20511	1.12736
	KTN1	Kinectin			0	0	0	0	1	0	0	NO	4.09471	206.636	105.365	0	0	0	303.218	430.15	366.684	380.341	414.217	397.279	217.332		0	3.2051	4967200000	2258200000	2709000000	8.76195	NaN	9.35436	9.32502	0.393147	1	0.839572	0.011614	-0.200017	NaN	-0.0561762	-0.761922	1.14871	NaN	1.03971	1.69575
	NAP1L4	Nucleosome assembly protein 1-like 4					0	0	0	0	0	YES	83.5768	330.033	206.805	279.732	217.416	248.574	228.759	272.11	250.435	225.639	80.3584	152.999	214.703		0	50.209	8716600000	3892400000	4824200000	9.27948	9.24107	9.18495	8.98414	0.0601331	0.451483	0.30103	0.479954	0.340164	0.128689	0.236095	0.243181	0.789952	0.914662	0.849041	0.84488
	DSG1	Desmoglein-1			0		0	1	1	0	1	NO	0	0	0	0	0	0	970.428	687.549	828.989	0	0	0	207.247		0	132.95	2417400000	2044500000	372890000	NaN	NaN	9.38335	NaN	1	1	2.2525e-19	1	NaN	NaN	-2.27327	NaN	NaN	NaN	4.83419	NaN
	GSS	Glutathione synthetase					0	0	0	0	0	YES	140.019	182.38	161.199	232.592	214.241	223.417	197.708	228.636	213.172	201.92	221.419	211.67	202.364		0	67.694	9243000000	4320000000	4922900000	8.94107	9.2647	9.19443	9.17228	0.574687	0.877494	0.950412	0.802133	0.102457	-0.0363483	0.00934718	-0.0773455	0.931446	1.02551	0.993542	1.05507
	MYO1C	Unconventional myosin-Ic					0	0	0	0	0	YES	161.821	246.885	204.353	107.573	209.945	158.759	212.107	215.168	213.638	222.254	203.022	212.638	197.347		0	48.682	5608300000	2882300000	2726000000	9.00924	8.97737	9.11143	9.03104	0.320746	0.0766394	0.444822	0.296603	-0.231312	-0.395132	-0.26479	-0.406694	1.1739	1.31506	1.20146	1.32564
	SRSF1	Serine/arginine-rich splicing factor 1					0	0	0	0	0	YES	125.071	198.855	161.963	233.436	251.082	242.259	153.497	250.207	201.852	150.705	205.327	178.016	196.023		0	40.8	5574900000	2482900000	3092100000	8.9703	9.10078	9.1245	9.07969	0.858886	0.987288	0.86407	0.884453	0.0271541	0.00374607	0.0356239	0.0569996	0.981354	0.997407	0.97561	0.961261
	IGF2BP1	Insulin-like growth factor 2 mRNA-binding protein 1					0	0	0	0	0	YES	176.49	228.709	202.6	141.366	217.988	179.677	171.835	196.553	184.194	225.937	198.936	212.436	194.727		0	55.618	7115700000	3259100000	3856500000	9.04926	9.069	9.11481	9.10816	0.305321	0.305866	0.156422	0.876878	0.193582	0.240742	0.394075	0.0601858	0.874432	0.84631	0.760977	0.959141
	PDLIM5	PDZ and LIM domain protein 5					0	0	0	0	0	YES	98.5331	338.494	218.513	206.765	184.959	195.862	245.451	174.276	209.864	140.911	167.005	153.958	194.549		0	46.598	5269800000	2563500000	2706300000	9.03491	9.00065	9.18036	8.91417	0.808633	0.95194	0.915071	0.719742	-0.062294	-0.0134508	-0.0320346	-0.134049	1.04412	1.00937	1.02245	1.09737
	MAPRE1	Microtubule-associated protein RP/EB family member 1					0	0	0	0	0	YES	151.72	143.597	147.658	145.296	249.447	197.372	213.752	178.904	196.328	293.301	174.536	233.919	193.819		0	101.31	7929000000	3650000000	4279000000	9.05477	9.05679	9.28744	9.31973	0.83067	0.691951	0.489625	0.916467	-0.0446723	0.0931545	0.156008	0.0298416	1.03145	0.937471	0.897505	0.979528
	MSH6	DNA mismatch repair protein Msh6					0	0	0	0	0	YES	113.935	186.331	150.133	108.939	223.289	166.114	262.646	211.653	237.15	272.748	170.719	221.733	193.782		0	73.623	8551600000	4092900000	4458700000	8.93687	9.22461	9.13789	9.15201	0.314823	0.232664	0.250007	0.370625	0.189666	-0.228081	-0.391759	-0.271513	0.876808	1.17128	1.31199	1.20707
	MCM7	DNA replication licensing factor MCM7					0	0	0	0	0	YES	194.177	206.53	200.354	138.342	102.48	120.411	247.979	208.446	228.213	232.213	210.221	221.217	192.549		0	105.82	6536700000	2885100000	3651600000	9.07033	8.94067	9.16301	9.16453	0.758685	0.353873	0.40026	0.358849	0.0475383	0.217975	0.191057	0.275603	0.967586	0.859771	0.875964	0.826105
	PDCD6;hCG_1985580	Programmed cell death protein 6					0	0	0	0	0	YES	303.551	78.6084	191.08	219.429	182.159	200.794	222.706	171.621	197.164	197.078	157.882	177.48	191.629		0	99.056	6171200000	2839100000	3332100000	9.14136	9.14919	9.14183	9.0782	0.963626	0.521933	0.220855	0.306658	-0.00114018	0.15056	0.338567	0.348006	1.00079	0.900901	0.790826	0.785669
	SARNP	SAP domain-containing ribonucleoprotein					0	0	0	0	0	YES	224.877	202.149	213.513	162.281	127.4	144.84	182.077	251.238	216.657	149.945	221.356	185.651	190.165		0	25.358	6513500000	2957400000	3556100000	9.05088	8.95528	9.14267	9.08938	0.12189	0.802513	0.983525	0.30216	0.296076	0.0588013	-0.0204136	0.351176	0.814465	0.960061	1.01425	0.783945
	SRP9	Signal recognition particle 9 kDa protein					0	0	0	0	0	YES	123.925	175.453	149.689	251.802	214.483	233.143	214.384	235.277	224.831	165.797	121.436	143.617	187.82		0	17.989	5689600000	2632000000	3057700000	9.01334	9.16962	9.14993	8.9916	0.774463	0.742948	0.884943	0.306982	0.0485151	0.0771063	0.0280033	0.347779	0.966931	0.947957	0.980777	0.785793
	EIF2S2	Eukaryotic translation initiation factor 2 subunit 2					0	0	0	0	0	YES	159.982	173.708	166.845	271.588	230.466	251.027	173.463	173.213	173.338	155.626	159.869	157.748	187.239		0	40.917	6931500000	3069600000	3861900000	8.93923	9.17771	9.09799	9.07144	0.85041	0.906146	0.175663	0.251038	0.0292761	0.0277203	0.375957	0.389677	0.979912	0.980969	0.770594	0.763301
	LARS2	Probable leucine--tRNA ligase, mitochondrial	0			0	0	0	1	0	0	NO	270.534	284.912	277.723	0	0	0	0	292.633	146.317	300.588	338.357	319.473	185.878		0.00069565	0.54397	3948500000	1888400000	2060100000	9.13453	NaN	8.9721	9.21685	0.660279	1	1	0.731984	-0.0816595	NaN	NaN	-0.105023	1.05823	NaN	NaN	1.07551
	UPF1	Regulator of nonsense transcripts 1					0	0	0	0	0	YES	224.503	195.192	209.847	97.5419	207.335	152.439	174.873	144.831	159.852	224.667	217.103	220.885	185.756		0	68.695	6755900000	3020300000	3735600000	9.05469	9.05576	9.05584	9.16917	0.939635	0.802057	0.25535	0.30823	0.00446549	0.0589399	0.313594	0.306262	0.99691	0.959969	0.804635	0.808734
	PDAP1	28 kDa heat- and acid-stable phosphoprotein					0	0	0	0	0	YES	80.8467	146.445	113.646	238.087	95.6176	166.852	220.048	248.567	234.308	244.633	203.981	224.307	184.778		0	39.402	6986100000	3292000000	3694100000	8.94365	8.94343	9.14351	9.1271	0.555298	0.832353	0.767904	0.987824	0.10809	0.0497701	-0.110635	0.00273846	0.927816	0.96609	1.0797	0.998104
	FKBP2	Peptidyl-prolyl cis-trans isomerase FKBP2;Peptidyl-prolyl cis-trans isomerase					0	0	0	0	0	YES	124.514	120.609	122.562	105.708	151.476	128.592	259.988	230.544	245.266	225.717	227.501	226.609	180.757		0	12.283	5029800000	2671400000	2358500000	8.76841	8.82474	9.05515	9.02197	0.84467	0.741179	0.116808	0.1759	-0.0518776	-0.0737121	-0.529156	-0.529989	1.03661	1.05242	1.44308	1.44392
	PFDN5	Prefoldin subunit 5					0	0	0	0	0	YES	251.463	193.114	222.288	203.227	197.364	200.296	128.742	166.052	147.397	146.466	158.586	152.526	180.627		0	279.87	6506900000	3111800000	3395100000	9.05926	9.05069	8.99038	9.01115	0.458574	0.85992	0.987074	0.667476	0.128294	-0.0393845	-0.0189511	0.151339	0.914913	1.02768	1.01322	0.900414
	SRRT	Serrate RNA effector molecule homolog					0	0	0	0	0	YES	203.052	193.809	198.431	103.482	163.229	133.356	279.055	190.188	234.621	153.362	156.844	155.103	180.378		0	52.325	6796600000	3031800000	3764800000	9.02841	8.96068	9.24704	9.14342	0.583588	0.388761	0.49593	0.556818	0.0999011	0.202637	0.153676	0.175812	0.933097	0.868961	0.898957	0.885269
	ATPIF1	ATPase inhibitor, mitochondrial					0	0	0	0	0	YES	161.932	125.497	143.715	192.582	158.111	175.347	197.027	144.766	170.897	198.895	250.539	224.717	178.669		0	8.2822	6907100000	3331400000	3575700000	8.89209	8.99302	9.16492	9.12646	0.953137	0.55641	0.699633	0.632806	-0.020999	0.13829	-0.102388	0.142609	1.01466	0.908595	1.07355	0.905879
	EIF3F	Eukaryotic translation initiation factor 3 subunit F					0	0	0	0	0	YES	97.9282	97.9848	97.9565	323.579	88.2494	205.914	174.039	195.53	184.784	241.24	210.221	225.731	178.596		0	105.03	7535000000	3607100000	3927900000	8.77203	9.15616	9.12284	9.11671	0.835106	0.890452	0.654957	0.900251	-0.054632	0.0323829	-0.160524	-0.0411202	1.03859	0.977804	1.11769	1.02891
	RECQL	ATP-dependent DNA helicase Q1					0	0	0	0	0	YES	151.569	151.763	151.666	184.17	284.455	234.313	152.557	138.905	145.731	188.317	167.765	178.041	177.438		0	87.279	7231600000	3332500000	3899100000	8.92207	9.21995	8.97617	9.0209	0.398113	0.152074	0.949974	0.603532	0.158208	0.251931	-0.0342489	-0.197947	0.896138	0.839772	1.02402	1.14707
	TRIM28	Transcription intermediary factor 1-beta					0	0	0	0	0	YES	176.976	206.606	191.791	247.435	130.53	188.983	159.656	207.707	183.681	172.058	116.257	144.158	177.153		0	96.717	7476100000	3248600000	4227400000	9.02375	9.1085	9.12795	9.04848	0.261294	0.000749518	0.0929551	0.0962628	0.212881	0.792522	0.469678	0.560715	0.862813	0.577334	0.722126	0.677966		+
	QARS	Glutamine--tRNA ligase					0	0	0	0	0	YES	222.625	184.079	203.352	142.134	108.272	125.203	184.548	170.68	177.614	226.336	170.584	198.46	176.157		0	84.422	6392500000	3166000000	3226500000	8.98877	8.90101	9.05675	9.16628	0.400235	0.478841	0.759337	0.809019	-0.197153	-0.158043	0.0745054	0.0712136	1.14643	1.11577	0.949668	0.951837
	TARDBP	TAR DNA-binding protein 43					0	0	0	0	0	YES	74.5712	229.654	152.112	79.5363	187.877	133.707	192.773	185.033	188.903	207.914	240.806	224.36	174.771		0	31.837	5703400000	2648500000	3054900000	8.88518	9.08877	9.09475	9.12917	0.350655	0.541568	0.634175	0.589171	0.175557	0.143524	0.123269	0.161436	0.885426	0.905305	0.918105	0.894135
	HSPA4L	Heat shock 70 kDa protein 4L					0	0	0	0	0	YES	140.385	110.313	125.349	87.8023	202.555	145.179	174.225	245.174	209.699	213.305	222.544	217.925	174.538		0	84.173	5712900000	2763900000	2949100000	8.82353	9.00381	9.11096	9.06948	0.239695	0.43091	0.697267	0.527568	0.223175	-0.175778	0.0982848	-0.242686	0.856678	1.12957	0.934143	1.18319
	RUVBL2	RuvB-like 2					0	0	0	0	0	YES	162.235	141.822	152.028	156.417	110.024	133.221	227.689	131.931	179.81	236.609	222.599	229.604	173.666		0	73.866	6281100000	2872300000	3408800000	8.87464	8.89391	9.18997	9.13001	0.171806	0.504871	0.319103	0.770416	0.260628	0.156785	0.227248	0.0863761	0.834725	0.897022	0.854263	0.941886
	CORO1B	Coronin-1B;Coronin					0	0	0	0	0	YES	111.094	147.004	129.049	141.666	289.389	215.528	181.923	211.344	196.634	172.747	132.69	152.719	173.482		0	68.37	5915400000	2960300000	2955100000	8.82011	9.07788	9.05381	8.95926	0.530846	0.509378	0.557925	0.858984	-0.148865	-0.14725	-0.206229	-0.0619476	1.1087	1.10746	1.15367	1.04387
	NARS	Asparagine--tRNA ligase, cytoplasmic					0	0	0	0	0	YES	141.667	203.864	172.765	230.65	253.876	242.263	107.925	169.478	138.702	142.431	134.068	138.249	172.995		0	54.427	7389600000	3514500000	3875100000	9.02951	9.18116	8.98295	9.10044	0.716195	0.887134	0.435137	0.659814	0.063641	0.0333701	0.210888	0.154842	0.956846	0.977135	0.864005	0.89823
	PTGR1	Prostaglandin reductase 1					0	0	0	0	0	YES	103.492	98.4305	100.961	161.728	120.677	141.202	242.469	217.182	229.825	183.475	246.151	214.813	171.701		0	90.921	4657400000	2303900000	2353500000	8.71946	8.88952	9.1801	9.07375	0.446702	0.993342	0.501297	0.255769	0.141694	-0.00186231	-0.174621	-0.443595	0.906454	1.00129	1.12867	1.35999
	TMED10	Transmembrane emp24 domain-containing protein 10					0	0	0	0	0	YES	112.733	141.738	127.236	269.271	219.535	244.403	136.051	188.784	162.417	173.727	126.758	150.243	171.075		0	22.286	4754000000	2717800000	2036100000	8.7793	9.03997	8.88329	8.79596	0.118304	0.021827	0.00558219	0.0142071	-0.359416	-0.511814	-0.924618	-0.96725	1.28291	1.42584	1.89818	1.95511		+
	ACAA2	3-ketoacyl-CoA thiolase, mitochondrial					0	0	0	0	0	YES	232.662	173.443	203.053	162.933	225.693	194.313	159.891	147.413	153.652	120.593	142.621	131.607	170.656		0	81.064	6370700000	3089700000	3281100000	8.99397	9.10387	9.03282	8.91974	0.47961	0.398234	0.286274	0.848191	-0.166924	0.19862	0.293135	-0.0674248	1.12266	0.871384	0.816127	1.04784
	ANP32A	Acidic leucine-rich nuclear phosphoprotein 32 family member A					0	0	0	0	0	YES	94.6886	17.7432	56.2159	91.1946	259.382	175.288	330.963	121.263	226.113	257.186	191.032	224.109	170.432		0	78.453	7742700000	3705500000	4037200000	8.69836	9.11853	9.23875	9.31416	0.0382622	0.895622	0.431097	0.436446	0.399226	-0.0292788	-0.203568	-0.236249	0.758265	1.0205	1.15154	1.17793	+
	U2AF1	Splicing factor U2AF 35 kDa subunit					0	0	0	0	0	YES	92.5156	121.35	106.933	139.962	131.623	135.792	220.972	265.275	243.123	154.929	228.143	191.536	169.346		0	25.753	5551100000	2598300000	2952700000	8.77042	8.85076	9.16215	9.08225	0.530512	0.709892	0.811676	0.559087	0.115433	0.0874628	0.0549179	0.202637	0.923105	0.941176	0.962649	0.868961
	PPL	Periplakin					0	0	0	0	0	YES	150.414	140.802	145.608	165.988	309.918	237.953	245.711	139.627	192.669	93.5278	99.4046	96.4662	168.174		0	80.821	4905800000	3126600000	1779300000	8.9551	9.01182	8.94649	8.72426	0.000506498	4.36623e-10	1.57667e-05	0.0171176	-0.790634	-1.39267	-1.43292	-0.940257	1.72983	2.62564	2.69993	1.91887	+	+
	CBS	Cystathionine beta-synthase					0	0	0	0	0	YES	233.752	125.845	179.798	184.346	175.15	179.748	199.993	175.194	187.593	170.883	79.2892	125.086	168.056		0	53.756	7157600000	3190400000	3967200000	9.09191	9.02612	9.12963	8.97489	0.443685	0.443871	0.387936	0.134123	0.132906	0.18002	0.234746	0.505891	0.911993	0.88269	0.849834	0.704225
	TMED7	Transmembrane emp24 domain-containing protein 7					0	0	0	0	0	YES	127.228	125.384	126.306	158.512	182.415	170.464	167.564	185.317	176.441	183.279	199.142	191.21	166.105		0	25.586	4353400000	2413600000	1939700000	8.75193	9.02362	8.89686	8.9132	0.524155	0.216083	0.027787	0.00802335	-0.15117	-0.276066	-0.736893	-1.0465	1.11047	1.21089	1.66658	2.06552
	KIF5B	Kinesin-1 heavy chain					0	0	0	0	0	YES	146.984	122.951	134.968	151.344	176.939	164.141	191.25	142.964	167.107	248.457	147.246	197.851	166.017		0	129.69	8751900000	4198300000	4553600000	8.89218	9.03854	9.11424	9.18375	0.570964	0.903762	1	0.979476	0.103531	0.0284276	-0.0136255	0.00590291	0.930752	0.980488	1.00949	0.995917
	AHSA1	Activator of 90 kDa heat shock protein ATPase homolog 1					0	0	0	0	0	YES	316.549	89.2522	202.901	140.936	94.7671	117.852	365.774	89.5533	227.664	130.223	99.4758	114.849	165.816		0	61.544	5605700000	2685000000	2920700000	9.20604	8.8031	9.17426	8.95027	0.361206	0.861068	0.572639	0.48661	0.160275	-0.0390583	0.126444	0.239642	0.894855	1.02744	0.916087	0.846955
	AIFM1	Apoptosis-inducing factor 1, mitochondrial					0	0	0	0	0	YES	259.438	210.111	234.775	254.588	129.46	192.024	145.192	108.761	126.976	141.851	74.6239	108.237	165.503		0	50.251	5548100000	3029700000	2518400000	9.01199	9.08976	8.817	8.80607	0.161037	0.287569	0.322312	0.813297	-0.323317	-0.237337	-0.338962	-0.0852365	1.2512	1.17881	1.26485	1.06086
	SAFB	Scaffold attachment factor B1					0	0	0	0	0	YES	153.089	171.177	162.133	155.266	173.09	164.178	216.134	170.647	193.391	143.779	131.953	137.866	164.392		0	32.205	5617400000	2589600000	3027800000	8.94526	9.00741	9.08998	8.96031	0.385756	0.343847	0.998692	0.482242	0.162597	0.222557	-0.0141644	0.241962	0.893416	0.857045	1.00987	0.845594
	SEC24C	Protein transport protein Sec24C					0	0	0	0	0	YES	126.153	130.634	128.394	160.815	189.094	174.955	180.772	187.923	184.348	201.144	135.05	168.097	163.948		0	67.21	4824900000	2470600000	2354300000	8.75411	8.94852	9.04297	8.99846	0.37844	0.167627	0.484412	0.304008	-0.206063	-0.307948	-0.243472	-0.400378	1.15354	1.23795	1.18384	1.31985
	MISP	Mitotic interactor and substrate of PLK1					0	0	0	0	0	YES	121.72	64.0093	92.8645	140.015	100.808	120.412	224.472	263.407	243.94	200.557	191.159	195.858	163.269		0	74.185	5641600000	3215500000	2426100000	8.61847	8.77096	9.10442	9.04984	0.184122	0.00156644	0.0335741	0.230745	-0.306787	-0.705688	-0.712197	-0.468272	1.23695	1.63092	1.6383	1.38345		+
	CHORDC1	Cysteine and histidine-rich domain-containing protein 1					0	0	0	0	0	YES	148.042	162.135	155.089	196.673	111.234	153.953	190.115	190.026	190.07	151.27	155.134	153.202	163.078		0.00072124	0.94964	1179000000	582340000	596640000	8.26839	NaN	8.72234	8.66822	2.81531e-06	1	0.100321	0.317311	-1.30226	NaN	0.459117	-0.389281	2.46615	NaN	0.727431	1.30974	+
	SF3B2	Splicing factor 3B subunit 2					0	0	0	0	0	YES	173.506	177.832	175.669	157.944	175.377	166.661	242.534	153.112	197.823	150.126	64.5662	107.346	161.875		0	117.04	5940400000	2967600000	2972800000	8.96052	9.03431	9.1066	8.9439	0.8229	0.675819	0.569632	0.84266	-0.0581575	-0.0933249	-0.200531	0.0746424	1.04114	1.06683	1.14912	0.949577
	AHCYL1	Putative adenosylhomocysteinase 2					0	0	0	0	0	YES	93.8369	64.9385	79.3877	183.717	154.189	168.953	242.696	128.676	185.686	189.579	226.329	207.954	160.495		0	80.068	5635600000	2762600000	2873000000	8.73722	8.98108	9.01616	9.08579	0.529868	0.687389	0.355721	0.950897	-0.149201	-0.0898046	-0.317211	-0.0157388	1.10895	1.06423	1.24592	1.01097
	RPS29	40S ribosomal protein S29					0	0	0	0	0	YES	174.54	218.33	196.435	256.852	229.506	243.179	19.8729	131.671	75.772	122.896	122.553	122.725	159.528		0	7.365	6436100000	2899400000	3536700000	9.00454	9.15528	8.96631	8.92908	0.445113	0.439695	0.304474	0.240011	0.142217	0.181675	0.281787	0.398679	0.906125	0.881679	0.822571	0.758553
	ALDH2	Aldehyde dehydrogenase, mitochondrial					0	0	0	0	0	YES	186.735	198.191	192.463	143.96	39.7859	91.8732	190.925	183.076	187.001	157.272	175.621	166.446	159.446		0	32.974	5503300000	3018000000	2485400000	8.94876	8.81475	8.98576	8.91132	0.127452	0.501911	0.158607	0.0918072	-0.350927	-0.149857	-0.47704	-0.662323	1.27538	1.10946	1.39189	1.58263
	HIST1H1C	Histone H1.2					0	0	0	0	0	YES	103.444	156.288	129.866	75.8062	197.592	136.699	307.999	194.718	251.359	108.236	122.323	115.279	158.301		0	17.984	6396500000	2567000000	3829500000	8.89453	9.06659	9.25402	9.04485	0.00182794	0.00877437	0.232525	0.00447651	0.604451	0.61617	0.273337	0.952035	0.657722	0.652401	0.827404	0.516903	+	+
	PPP2CA	Serine/threonine-protein phosphatase 2A catalytic subunit alpha isoform					0	0	0	0	0	YES	254.296	109.867	182.082	67.1818	62.5121	64.847	140.775	188.824	164.8	264.277	176.92	220.599	158.082		0	100.03	5705200000	2752800000	2952400000	8.94622	8.5737	9.00822	9.1068	0.859453	0.587715	0.743827	0.895378	0.0270125	0.186627	0.0803848	-0.0435716	0.981451	0.878657	0.945805	1.03066
	RBM14	RNA-binding protein 14					0	0	0	0	0	YES	137.384	171.162	154.273	131.519	113.221	122.37	181.299	191.836	186.568	143.732	187.231	165.481	157.173		0	46.883	9669300000	2862500000	6806700000	9.01246	8.86842	9.09989	9.13319	0.590671	0.437138	0.503401	0.490232	0.0978804	0.182692	0.178874	0.206768	0.934405	0.881057	0.883392	0.866476
	SAMHD1	Deoxynucleoside triphosphate triphosphohydrolase SAMHD1					0	0	0	0	0	YES	74.451	266.42	170.435	64.8348	67.7402	66.2875	320.948	77.7395	199.344	214.442	166.831	190.636	156.676		0	38.9	3990500000	2100600000	1889900000	8.94414	8.61262	8.94117	9.03362	0.771398	0.647345	0.836469	0.431608	-0.0731808	0.107554	-0.0814764	-0.304273	1.05203	0.92816	1.0581	1.2348
	CORO1C	Coronin-1C;Coronin					0	0	0	0	0	YES	198.953	219.531	209.242	187.47	114.064	150.767	100.949	111.335	106.142	181.132	136.198	158.665	156.204		0	60.276	5074200000	2435500000	2638700000	9.01326	8.93919	8.89671	9.01528	0.875102	0.670489	0.467855	0.866498	-0.0431553	0.100036	0.195221	-0.0581425	1.03036	0.93301	0.873439	1.04112
	PSMC5	26S protease regulatory subunit 8					0	0	0	0	0	YES	273.249	117.588	195.418	153.892	112.891	133.391	119.156	155.474	137.315	200.329	109.415	154.872	155.249		0	83.717	5566000000	2759700000	2806300000	9.03181	8.9247	8.8846	9.02284	0.822372	0.780093	0.604494	0.716886	0.0363276	-0.0623091	-0.183884	-0.13557	0.975134	1.04414	1.13594	1.09853
	PDHA1	Pyruvate dehydrogenase E1 component subunit alpha, somatic form, mitochondrial					0	0	0	0	0	YES	101.017	99.2086	100.113	87.7793	22.8619	55.3206	198.283	313.887	256.085	171.18	243.174	207.177	154.674		0	102.9	5436100000	2383300000	3052800000	8.69932	8.52838	9.22515	9.17534	0.895941	0.223956	0.340678	0.160999	0.017922	0.375735	0.217107	0.422018	0.987654	0.770713	0.860289	0.74638
	GNB1	Guanine nucleotide-binding protein G(I)/G(S)/G(T) subunit beta-1					0	0	0	0	0	YES	45.9593	194.27	120.115	195.237	186.426	190.831	251.521	55.9223	153.721	233.663	65.3582	149.51	153.545		0	44.842	5795700000	2704000000	3091700000	8.76374	9.02366	9.1233	9.07258	0.841811	0.868731	0.499456	0.881156	-0.0527004	0.0388575	0.180657	0.0583859	1.0372	0.973425	0.882301	0.960338
	VBP1	Prefoldin subunit 3					0	0	0	0	0	YES	145.169	157.527	151.348	194.309	199.74	197.024	172.977	123.025	148.001	130.944	96.3397	113.642	152.504		0	95.303	5573800000	2697000000	2876800000	8.93986	8.98726	8.96678	8.86901	0.386835	0.930765	0.893892	0.493098	0.16221	-0.0193897	0.0247452	0.236217	0.893655	1.01353	0.982994	0.848969
	WDR77	Methylosome protein 50					0	0	0	0	0	YES	129.433	128.504	128.968	61.2168	77.0395	69.1282	197.894	196.537	197.215	179.377	230.384	204.88	150.048		0	66.954	4764700000	2163700000	2601100000	8.76634	8.64088	9.07849	9.06028	0.460903	0.547845	0.978088	0.590345	-0.173775	0.141302	-0.0226541	-0.205513	1.12801	0.906701	1.01583	1.1531
	HUWE1	E3 ubiquitin-protein ligase HUWE1					0	0	0	0	0	YES	109.43	97.0028	103.216	178.068	108.462	143.265	242.785	192.047	217.416	173.28	94.6608	133.971	149.467		0	206.94	6275500000	3034200000	3241300000	8.73462	8.91399	9.20629	8.9992	0.920661	0.920011	0.330771	0.667476	-0.0301919	0.0236102	-0.250251	0.151339	1.02115	0.983768	1.18941	0.900414
	MAGED2	Melanoma-associated antigen D2					0	0	0	0	0	YES	180.598	200.396	190.497	136.354	131.762	134.058	193.097	199.24	196.169	71.0321	82.2353	76.6337	149.339		0	77.303	5861700000	3041800000	2819800000	8.96483	8.95863	9.10099	8.73331	0.01669	0.548957	0.551675	0.204127	-0.546625	0.140909	-0.209295	0.430178	1.46066	0.906947	1.15612	0.74217	+
	SERPINB5	Serpin B5					0	0	0	0	0	YES	168.785	174.871	171.828	160.301	157.268	158.784	111.013	128.464	119.739	125.866	162.934	144.4	148.688		0	108.81	4427000000	1980000000	2446900000	8.9695	8.98079	8.93299	8.98821	0.145498	0.510518	0.125363	0.662362	-0.335481	0.154713	0.427284	0.153676	1.2618	0.898311	0.74366	0.898957
	SSB	Lupus La protein					0	0	0	0	0	YES	97.9919	216.056	157.024	156.686	143.492	150.089	221.936	156.115	189.026	106.425	88.0244	97.2249	148.341		0	39.291	5528000000	2739500000	2788600000	8.92591	9.1121	9.0905	8.88948	0.694831	0.96461	0.432086	0.173651	0.0692898	-0.00990192	0.212383	0.460271	0.953107	1.00689	0.863111	0.72685
	SEC23B	Protein transport protein Sec23B					0	0	0	0	0	YES	105.585	103.069	104.327	35.444	216.793	126.118	169.46	161.953	165.706	207.178	181.925	194.551	147.676		0	37.239	5247200000	3051400000	2195700000	8.67946	8.9607	8.93179	8.95202	0.329463	0.0071196	0.0238762	0.0700862	-0.227321	-0.600599	-0.756234	-0.712244	1.17066	1.51635	1.68908	1.63835		+
	NASP	Nuclear autoantigenic sperm protein					0	0	0	0	0	YES	81.9849	87.4694	84.7272	178.122	177.694	177.908	217.917	140.812	179.365	162.577	134.131	148.354	147.588		0	111.1	5778700000	2436300000	3342400000	8.7718	9.00856	9.1293	9.03567	0.0018888	0.431739	0.465175	0.327066	0.602552	0.184852	0.196481	0.333996	0.658588	0.87974	0.872676	0.793336	+
	HPRT1	Hypoxanthine-guanine phosphoribosyltransferase					0	0	0	0	0	YES	216.369	192.525	204.447	124.374	114.504	119.439	161.665	93.6124	127.639	161.464	111.593	136.528	147.013		0	32.96	4829100000	2068700000	2760400000	9.0141	8.85066	9.00979	8.97131	0.671754	0.319334	0.126841	0.298031	0.0754641	0.234133	0.425567	0.354114	0.949037	0.850196	0.744546	0.78235
	ITGB1	Integrin beta-1					0	0	0	0	0	YES	134.734	150.275	142.504	103.667	116.234	109.95	155.045	207.813	181.429	214.058	89.2756	151.667	146.387		0	38.625	4960300000	2564300000	2396000000	8.83836	8.89331	8.94399	8.8221	0.313171	0.835593	0.039999	0.0229925	-0.234839	0.0487942	-0.688729	-0.896227	1.17678	0.966744	1.61186	1.86119
	NACA	Nascent polypeptide-associated complex subunit alpha;Nascent polypeptide-associated complex subunit alpha, muscle-specific form					0	0	0	0	0	YES	185.262	169.749	177.506	72.509	10.6901	41.5996	235.282	182.524	208.903	162.898	137.315	150.106	144.529		0	22.236	5232800000	2498300000	2734400000	8.95833	8.50202	9.054	8.93309	0.141094	0.416373	0.876148	0.762571	0.281312	0.262553	-0.0648571	0.109026	0.822842	0.833611	1.04598	0.927214
	DYNLL1	Dynein light chain 1, cytoplasmic					0	0	0	0	0	YES	79.437	201.703	140.57	104.296	141.931	123.113	176.405	150.246	163.325	127.347	174.077	150.712	144.43		0	29.333	5088100000	2112300000	2975900000	8.82163	8.8598	9.08001	9.00273	0.665303	0.408175	0.126192	0.171169	-0.105163	0.194465	0.426318	0.46289	1.07562	0.873897	0.744158	0.725531
	PSMB4	Proteasome subunit beta type-4					0	0	0	0	0	YES	188.693	235.357	212.025	41.9647	82.7801	62.3724	192.749	139.538	166.143	112.412	161.524	136.968	144.377		0	122.4	3981500000	1858300000	2123100000	9.02776	8.73406	9.01414	8.94651	0.516847	0.91092	0.908983	0.831904	0.119555	0.0263043	-0.0512049	-0.0757176	0.920471	0.981932	1.03613	1.05389
	ARPC3	Actin-related protein 2/3 complex subunit 3					0	0	0	0	0	YES	153.726	222.424	188.075	66.9139	141	103.957	179.816	132.207	156.012	115.147	139.833	127.49	143.883		0	20.982	5624500000	2879800000	2744700000	8.92476	8.91839	9.04171	8.90301	0.247003	0.203927	0.910321	0.541408	-0.2684	-0.283527	0.0187766	-0.234313	1.20447	1.21717	0.987069	1.17635
	PRKDC	DNA-dependent protein kinase catalytic subunit					0	0	0	0	0	YES	162.346	258.699	210.523	95.2854	59.5282	77.4068	162.638	91.8183	127.228	202.453	117.112	159.783	143.735		0	128.42	5615000000	2521300000	3093700000	9.02222	8.98048	8.90766	9.04481	0.358002	0.415515	0.99681	0.83238	-0.214709	0.191436	-0.0124754	-0.0754744	1.16047	0.875733	1.00868	1.05371
	MSH2	DNA mismatch repair protein Msh2					0	0	0	0	0	YES	132.067	131.691	131.879	62.5921	99.5033	81.0477	176.729	218.716	197.722	183.921	141.932	162.927	143.394		0	74.924	5516600000	2614300000	2902300000	8.95397	9.0443	9.1745	9.02024	0.191311	0.796274	0.617538	0.907184	0.248899	-0.0576169	-0.130997	-0.037636	0.841538	1.04075	1.09505	1.02643
	C1QBP	Complement component 1 Q subcomponent-binding protein, mitochondrial					0	0	0	0	0	YES	36.3002	52.7529	44.5265	104.035	77.1422	90.5886	279.922	136.631	208.277	251.427	208.661	230.044	143.359		0	95.888	4069600000	2033300000	2036300000	8.33971	8.72069	9.07751	9.07886	0.536754	0.686377	0.301731	0.627628	-0.186754	-0.0901117	-0.3531	-0.18431	1.1382	1.06445	1.2773	1.13627
	DDX21	Nucleolar RNA helicase 2					0	0	0	0	0	YES	174.803	221.556	198.179	203.304	90.7201	147.012	129.261	192.656	160.958	63.8655	66.6989	65.2822	142.858		0	42.553	6530800000	3203400000	3327400000	9.08443	8.95466	9.13481	8.63062	0.0122827	0.144092	0.550759	0.71644	-0.41999	-0.325991	-0.209745	-0.135808	1.33792	1.25353	1.15648	1.09871	+
	DYNC1I2	Cytoplasmic dynein 1 intermediate chain 2					0	0	0	0	0	YES	127.395	140.386	133.891	160.17	70.1223	115.146	174.144	123.999	149.072	240.362	100.109	170.236	142.086		0	119.52	3627500000	1842700000	1784800000	8.80625	8.74814	8.88759	8.96956	0.609799	0.348837	0.632406	0.452684	0.0924781	-0.209078	-0.170865	-0.290145	0.93791	1.15595	1.12573	1.22276
	PGLS	6-phosphogluconolactonase					0	0	0	0	0	YES	154.816	164.303	159.559	69.9563	72.7139	71.3351	197.732	176.809	187.271	203.84	90.6061	147.223	141.347		0	84.23	4433800000	2128500000	2305300000	8.88533	8.55154	9.03985	9.02342	0.809041	0.677256	0.713891	0.676665	0.0396999	-0.0817512	-0.134144	-0.157222	0.972857	1.0583	1.09744	1.11514
	BANF1	Barrier-to-autointegration factor;Barrier-to-autointegration factor, N-terminally processed					0	0	0	0	0	YES	30.332	43.5889	36.9605	123.867	142.055	132.961	253.87	203.794	228.832	234.031	98.771	166.401	141.289		0	34.744	5943300000	2714400000	3229000000	8.30466	8.90434	9.2251	9.17522	0.21585	0.403032	0.611277	0.739812	0.285816	0.196607	-0.133242	0.0985544	0.820277	0.8726	1.09676	0.933968
	H3F3B;H3F3A;HIST3H3;H3F3C	Histone H3;Histone H3.3;Histone H3.1t;Histone H3.3C					0	0	0	0	0	YES	85.8135	0	42.9068	199.696	110.501	155.099	456.035	0	228.017	199.123	74.7197	136.921	140.736		0	91.617	4257400000	1835200000	2422200000	8.03266	8.99367	9.18219	8.95064	1	0.989241	0.319103	0.668616	NaN	0.00317045	0.227248	0.15082	NaN	0.997805	0.854263	0.900739
	SH3BGRL3	SH3 domain-binding glutamic acid-rich-like protein 3					0	0	0	0	0	YES	65.7997	58.1397	61.9697	157.637	120.508	139.073	168.699	181.493	175.096	251.709	120.937	186.323	140.615		0	23.252	4287100000	2326300000	1960800000	8.44135	8.8513	8.95957	8.89402	0.0773555	0.768553	0.302282	0.0678518	-0.405413	-0.0656722	-0.352713	-0.71807	1.32447	1.04657	1.27696	1.64498
	H1F0	Histone H1.0;Histone H1.0, N-terminally processed					0	0	0	0	0	YES	89.8013	89.9019	89.8516	168.221	170.656	169.438	147.55	201.01	174.28	111.981	143.904	127.942	140.378		0	10.181	7202000000	3306000000	3896000000	8.7204	9.132	9.00139	8.9709	0.0188455	0.0869917	0.693558	0.813685	0.453544	0.402395	-0.14315	-0.0850376	0.730247	0.756601	1.10431	1.06072	+
	NAA10	N-alpha-acetyltransferase 10					0	0	0	0	0	YES	175.273	163.781	169.527	83.6808	186.631	135.156	108.606	106.139	107.372	174.949	113.984	144.467	139.131		0	37.864	4846300000	2443300000	2403100000	8.95893	8.93101	8.92001	8.97207	0.963186	0.249252	0.898702	0.841911	0.00129788	-0.257132	-0.0554714	-0.0706181	0.999101	1.1951	1.0392	1.05017
	LAMP1	Lysosome-associated membrane glycoprotein 1					0	0	0	0	0	YES	89.4113	85.8	87.6056	121.204	125.713	123.459	184.127	130.583	157.355	207.695	166.997	187.346	138.941		0	15.71	5248200000	2620500000	2627700000	8.62283	8.84142	9.05584	8.98813	0.350153	0.980365	0.454193	0.380721	-0.218112	-0.00549265	-0.259651	-0.340148	1.16321	1.00381	1.19719	1.26589
	SDCBP	Syntenin-1					0	0	0	0	0	YES	101.725	83.0201	92.3725	13.3346	34.5388	23.9367	232.964	192.664	212.814	183.843	268.912	226.377	138.875		0	236.64	3224900000	1853700000	1371200000	8.642	8.10493	9.00368	8.95868	0.738933	0.0235783	0.125232	0.0638509	0.0576928	-0.597824	-0.517606	-0.728909	0.960799	1.51343	1.43158	1.65739		+
	VARS	Valine--tRNA ligase					0	0	0	0	0	YES	178.998	154.671	166.834	126.208	106.212	116.21	194.021	117.886	155.954	117.286	113.066	115.176	138.543		0	93.962	5084700000	2126700000	2958100000	8.93623	8.80604	9.04005	8.90764	0.761558	0.787504	0.379111	0.12958	-0.0760826	-0.0601566	0.239398	0.511772	1.05415	1.04258	0.847099	0.701361
	MYOF	Myoferlin					0	0	0	0	0	YES	120.693	121.773	121.233	53.8127	122.905	88.3591	166.454	114.809	140.632	300.447	103.832	202.139	138.091		0	82.518	4321400000	2273000000	2048400000	8.77711	8.73743	8.93379	8.97923	0.155684	0.17755	0.194468	0.396181	-0.327403	-0.30091	-0.440126	-0.32896	1.25475	1.23192	1.35672	1.25611
	UBA6	Ubiquitin-like modifier-activating enzyme 6					0	0	0	0	0	YES	94.7045	130.4	112.552	141.389	196.998	169.194	162.783	114.818	138.8	147.038	113.739	130.389	137.734		0	77.985	6490700000	3036800000	3453900000	8.7853	9.03479	9.02338	8.98203	0.914893	0.438158	0.938185	0.702027	-0.0318281	-0.173026	-0.0391177	-0.143516	1.02231	1.12742	1.02749	1.10459
	GMPS	GMP synthase [glutamine-hydrolyzing]					0	0	0	0	0	YES	170.361	106.967	138.664	111.226	143.001	127.114	157.289	173.018	165.154	128.961	106.017	117.489	137.105		0	83.953	4788500000	2159500000	2629000000	8.8202	9.05173	9.10127	8.90396	0.741598	0.415868	0.894947	0.813829	0.0569996	-0.181575	-0.0570314	0.0869197	0.961261	1.13412	1.04032	0.941531
	EFTUD2	116 kDa U5 small nuclear ribonucleoprotein component					0	0	0	0	0	YES	140.528	206.734	173.631	65.3383	204.923	135.131	155.126	116.271	135.698	100.862	106.326	103.594	137.014		0	56.707	5490500000	2585900000	2904600000	8.96535	9.04092	8.97818	8.87499	0.822277	0.663001	0.8633	0.45994	-0.0583378	0.102457	0.0359054	0.253989	1.04127	0.931446	0.975419	0.838574
	RAD23B	UV excision repair protein RAD23 homolog B					0	0	0	0	0	YES	150.001	124.56	137.28	151.19	151.63	151.41	141.91	135.941	138.926	126.179	113.264	119.722	136.834		0	63.955	4185100000	1938700000	2246400000	8.82244	9.0106	8.9006	8.93613	0.982117	0.913788	0.333757	0.509776	-0.00336541	0.0254541	-0.331354	-0.253618	1.00234	0.982511	1.25819	1.19219
	NUMA1	Nuclear mitotic apparatus protein 1					0	0	0	0	0	YES	254.424	166.093	210.258	133.522	181.719	157.621	69.6252	110.734	90.1796	119.174	59.2325	89.2034	136.816		0	210.21	5204600000	2346000000	2858600000	9.05003	9.07613	8.83312	8.80214	0.539894	0.578758	0.48087	0.279269	0.112633	0.130535	0.18916	0.367818	0.924898	0.913492	0.877116	0.774953
	UBE2I	SUMO-conjugating enzyme UBC9					0	0	0	0	0	YES	108.379	177.485	142.932	182.098	241.544	211.821	106.767	105.084	105.925	120.193	49.5621	84.8775	136.389		0	38.116	5495600000	2509900000	2985700000	8.907	9.14977	8.887	8.83733	0.363236	0.797962	0.399781	0.187072	0.170822	0.0601858	0.228603	0.446574	0.888336	0.959141	0.853461	0.733783
	MCTS1	Malignant T-cell-amplified sequence 1					0	0	0	0	0	YES	145.933	128.269	137.101	193.971	195.421	194.696	88.9721	118.39	103.681	90.9342	126.972	108.953	136.108		0	40.724	4939900000	2497000000	2442900000	8.82749	8.98646	8.785	8.78142	0.927206	0.34203	0.942381	0.712217	-0.0283369	-0.212049	-0.0373843	-0.138061	1.01984	1.15833	1.02625	1.10042
	SRRM2	Serine/arginine repetitive matrix protein 2					0	0	0	0	0	YES	136.453	145.138	140.795	190.348	175.7	183.024	133.434	101	117.217	114.269	92.0316	103.15	136.047		0	105.06	4790300000	2335300000	2455000000	8.87431	9.01055	8.90549	8.8425	0.925926	0.966789	0.989415	0.847835	0.0104934	-0.00929198	-0.0179867	0.0724488	0.992753	1.00646	1.01255	0.951022
	PRPF8	Pre-mRNA-processing-splicing factor 8					0	0	0	0	0	YES	195.721	238.847	217.284	48.9076	204.974	126.941	113.362	116.165	114.764	85.6215	83.4311	84.5263	135.879		0	52.517	5481900000	2803500000	2678400000	9.02098	8.97801	8.87398	8.78332	0.440412	0.852093	0.759726	0.785801	-0.18146	-0.0416101	-0.11416	0.0989585	1.13403	1.02926	1.08234	0.933707
	CAPG	Macrophage-capping protein					0	0	0	0	0	YES	129.465	197.851	163.658	138.074	115.64	126.857	130.209	120.338	125.273	115.531	134.076	124.803	135.148		0	61.557	5443400000	2492000000	2951400000	8.91176	8.92336	8.99254	8.94111	0.860481	0.192708	0.33894	0.892718	-0.0473385	0.306262	0.261471	0.0535284	1.03336	0.808734	0.834237	0.963577
	PGM2	Phosphoglucomutase-2					0	0	0	0	0	YES	59.8076	70.5202	65.1639	287.453	125.061	206.257	221.207	71.9787	146.593	121.564	121.088	121.326	134.835		0	42.41	4910100000	2312200000	2597900000	8.49842	9.33917	9.02951	8.80903	0.886202	0.701169	0.618224	0.483143	0.0203421	0.0617071	0.129745	-0.270365	0.985999	0.95813	0.913993	1.20611
	SLC25A5	ADP/ATP translocase 2;ADP/ATP translocase 2, N-terminally processed					0	0	0	0	0	YES	41.1986	54.967	48.0828	149.318	130.721	140.019	272.645	152.803	212.724	174.981	101.662	138.321	134.787		0	24.988	5867100000	2772300000	3094900000	8.3376	8.93629	9.07838	8.97798	0.252179	0.202749	0.461184	0.185691	-0.331427	0.299479	-0.255856	0.447949	1.25826	0.812546	1.19404	0.733084
	PRPF19	Pre-mRNA-processing factor 19					0	0	0	0	0	YES	138.475	128.292	133.383	121.503	143.28	132.392	150.288	101.731	126.01	127.99	165.445	146.717	134.625		0	51.641	4745600000	2181900000	2563700000	8.84514	8.89609	8.93213	8.93659	0.246562	0.215435	0.31015	0.369066	0.219834	0.29125	0.278342	0.306845	0.858664	0.817194	0.824538	0.808407
	CTSD	Cathepsin D;Cathepsin D light chain;Cathepsin D heavy chain					0	0	0	0	0	YES	259.048	224.872	241.96	25.7704	78.5498	52.1601	145.337	103.996	124.667	153.519	82.061	117.79	134.144		0	37.776	4776000000	2231600000	2544400000	8.9981	8.48973	8.91803	8.84482	0.0562781	0.46473	0.368184	0.590951	-0.437526	0.239642	-0.309431	-0.205164	1.35428	0.846955	1.23922	1.15282
	SUPT16H	FACT complex subunit SPT16					0	0	0	0	0	YES	115.185	132.167	123.676	153.508	135.743	144.626	182.595	149.264	165.93	114.951	87.1849	101.068	133.825		0	82.438	6694800000	2198000000	4496800000	9.15728	8.91626	9.2385	9.10684	0.406899	0.371158	0.46359	0.169891	0.144699	0.210264	0.165815	0.46425	0.904568	0.864379	0.891425	0.724848
	LONP1	Lon protease homolog, mitochondrial					0	0	0	0	0	YES	130.125	152.654	141.39	234.886	138.397	186.642	120.777	108.38	114.578	99.2793	85.0863	92.1828	133.698		0	60.713	5373600000	2751500000	2622100000	8.86127	9.08325	8.8821	8.73259	0.83573	0.939511	0.633847	0.917844	-0.0544522	-0.0169352	-0.170199	-0.0322854	1.03846	1.01181	1.12521	1.02263
	DNM2	Dynamin-2					0	0	0	0	0	YES	133.962	134.237	134.099	149.985	89.1292	119.557	79.3205	133.66	106.49	71.2554	276.087	173.671	133.455		0	45.3	4211000000	1951200000	2259800000	8.86204	8.80451	8.95447	9.00724	0.945676	0.860284	0.971611	0.789551	0.00561564	0.0413831	-0.0253239	0.0973411	0.996115	0.971723	1.01771	0.934754
	ACOT9	Acyl-coenzyme A thioesterase 9, mitochondrial					0	0	0	0	0	YES	111.818	167.415	139.616	129.508	144.233	136.871	96.1191	116.993	106.556	165.39	135.747	150.568	133.403		0	84.889	3824300000	1938700000	1885500000	8.80908	8.87817	8.79463	8.92358	0.888163	0.779886	0.843251	0.313462	-0.039429	-0.0623694	-0.0786247	-0.392459	1.02771	1.04418	1.05601	1.31263
	RNPEP	Aminopeptidase B					0	0	0	0	0	YES	83.8395	205.231	144.535	198.2	74.019	136.109	138.247	144.344	141.296	136.374	86.7177	111.546	133.371		0	53.221	4797800000	2327100000	2470700000	8.95699	8.90388	8.91271	8.92656	0.71672	0.276267	0.849502	0.532343	0.0635029	-0.242977	0.0409626	0.215989	0.956938	1.18343	0.972006	0.860956
	VPS26A	Vacuolar protein sorting-associated protein 26A					0	0	0	0	0	YES	93.3673	77.1883	85.2778	74.6987	112.018	93.3584	149.6	258.885	204.242	166.479	133.165	149.822	133.175		0	43.622	4488700000	2082400000	2406300000	8.66331	8.8081	9.08135	8.93794	0.134846	0.730683	0.854474	0.968092	0.285935	0.0809305	0.0391384	0.0220482	0.82021	0.945448	0.973236	0.984834
	NSF	Vesicle-fusing ATPase					0	0	0	0	0	YES	168.045	157.663	162.854	159.978	206.485	183.231	94.9603	81.6541	88.3072	117.317	78.609	97.9631	133.089		0	46.649	4284300000	2033400000	2250900000	8.95387	9.06993	8.83809	8.83683	0.655206	0.634727	0.310939	0.799808	-0.108301	0.111699	0.277866	-0.092171	1.07796	0.925497	0.82481	1.06597
	BLMH	Bleomycin hydrolase					0	0	0	0	0	YES	108.459	125.044	116.751	39.5839	82.3622	60.9731	233.799	187.257	210.528	141.867	144.442	143.155	132.852		0	15.978	3920800000	1844000000	2076800000	8.77538	8.66901	9.08881	8.94816	0.254371	0.64599	0.173479	0.620953	0.216113	-0.102512	-0.461045	0.172872	0.860882	1.07364	1.37654	0.887075
	UBQLN1	Ubiquilin-1					0	0	0	0	0	YES	66.2494	89.5242	77.8868	102.485	109.372	105.928	191.874	167.514	179.694	154.968	176.825	165.896	132.351		0	57.392	5146000000	2499900000	2646100000	8.61023	8.9673	8.99959	8.98827	0.974723	0.806717	0.547373	0.646021	-0.00154454	-0.0546021	-0.211415	-0.174052	1.00107	1.03857	1.15782	1.12822
	PSMD3	26S proteasome non-ATPase regulatory subunit 3					0	0	0	0	0	YES	137.177	181.405	159.291	102.761	247.087	174.924	55.8223	162.935	109.379	89.704	78.4292	84.0666	131.915		0	77.82	5630200000	2800800000	2829400000	8.93289	9.12258	8.85005	8.70725	0.970269	0.548069	0.855469	0.567887	-0.00044731	-0.134049	-0.0734995	-0.218582	1.00031	1.09737	1.05227	1.16359
	GBE1	1,4-alpha-glucan-branching enzyme					0	0	0	0	0	YES	117.398	107.156	112.277	90.2353	93.6747	91.955	143.522	171.467	157.495	159.928	171.646	165.787	131.878		0	44.917	4888500000	2139600000	2748800000	8.83586	8.86201	8.93461	9.06752	0.405477	0.447026	0.208564	0.526279	-0.195054	-0.169696	-0.426994	-0.243472	1.14477	1.12482	1.34443	1.18384
	LMAN1	Protein ERGIC-53					0	0	0	0	0	YES	116.076	124.908	120.492	85.4307	67.9558	76.6932	195.512	186.462	190.987	144.797	133.743	139.27	131.861		0	48.56	3327200000	1871500000	1455600000	8.79066	8.56845	8.92909	8.74729	0.33282	0.0602728	0.0154581	0.0827461	-0.225801	-0.490254	-0.8096	-0.681839	1.16943	1.40469	1.75273	1.60418
	PAFAH1B1	Platelet-activating factor acetylhydrolase IB subunit alpha					0	0	0	0	0	YES	44.7176	67.6179	56.1678	134.52	63.9455	99.2328	108.881	382.243	245.562	153.479	92.4196	122.949	130.978		0	67.053	3672600000	1892300000	1780300000	8.45272	8.91341	9.00915	8.82592	0.80738	0.867321	0.857752	0.468787	0.040121	0.0392789	-0.0725435	-0.279599	0.972573	0.973141	1.05157	1.21386
	PSMD12	26S proteasome non-ATPase regulatory subunit 12					0	0	0	0	0	YES	165.45	192.397	178.923	100.965	61.0084	80.9867	178.568	114.136	146.352	129.533	103.182	116.358	130.655		0	74.228	4781900000	2323800000	2458100000	8.95034	8.95194	8.96173	8.83997	0.985793	0.692506	0.943891	0.892056	-0.0117771	-0.0882547	0.00662125	0.0538064	1.0082	1.06308	0.995421	0.963391
	HK1	Hexokinase-1					0	0	0	0	0	YES	95.4607	169.417	132.439	106.084	131.623	118.853	102.002	131.72	116.861	141.428	162.768	152.098	130.063		0	37.318	5257800000	2252700000	3005200000	8.78436	8.93077	8.86436	8.92189	0.170289	0.271642	0.510036	0.278908	-0.316492	0.258459	-0.230178	-0.42223	1.2453	0.835981	1.17298	1.34
	RPS27	40S ribosomal protein S27					0	0	0	0	0	YES	132.577	156.59	144.583	186.595	83.3226	134.959	102.188	133.611	117.9	109.544	129.205	119.375	129.204		0	18.407	4665200000	2292000000	2373300000	8.82349	8.96929	8.89438	8.8828	0.424784	0.617222	0.635488	0.623407	-0.187461	-0.111539	0.122739	0.171719	1.13876	1.08038	0.918442	0.887784
	PRMT5	Protein arginine N-methyltransferase 5;Protein arginine N-methyltransferase 5, N-terminally processed					0	0	0	0	0	YES	67.1106	114.211	90.6609	174.714	193.053	183.884	116.952	170.323	143.637	119.221	76.7748	97.9981	129.045		0	107.63	5134900000	2440200000	2694800000	8.6672	9.02869	8.99661	8.76487	0.487234	0.801146	0.292806	0.971265	0.128689	0.0592169	0.289008	-0.00556507	0.914662	0.959785	0.818465	1.00386
	EIF4B	Eukaryotic translation initiation factor 4B					0	0	0	0	0	YES	40.5348	51.5472	46.041	107.857	172.906	140.382	166.13	167.993	167.061	134.337	190.874	162.605	129.022		0	114.64	5095300000	2582900000	2512400000	8.46802	8.81594	8.98928	9.06476	0.657094	0.420206	0.491769	0.649605	0.0794293	-0.179891	-0.239617	-0.172067	0.946432	1.1328	1.18068	1.12667
	BAG2	BAG family molecular chaperone regulator 2					0	0	0	0	0	YES	92.229	140.688	116.459	184.914	117.993	151.454	134.892	123.707	129.3	181.539	56.1598	118.85	129.015		0	94.124	4740300000	2266900000	2473400000	8.89637	8.98741	8.89933	8.86656	0.353011	0.770901	0.518242	0.653329	0.174662	0.0684644	0.172231	0.15782	0.885975	0.953653	0.887469	0.896379
	TIMM44	Mitochondrial import inner membrane translocase subunit TIM44					0	0	0	0	0	YES	133.922	182.1	158.011	105.754	94.8038	100.279	131.748	157.496	144.622	96.7091	125.436	111.072	128.496		0	12.81	4554200000	2252600000	2301600000	8.93908	8.84861	8.94006	8.887	0.951065	0.544199	0.988705	0.955125	-0.0215847	-0.135348	-0.0182788	-0.0136255	1.01507	1.09836	1.01275	1.00949
	SNX2	Sorting nexin-2					0	0	0	0	0	YES	82.168	130.332	106.25	77.4257	93.0296	85.2276	175.489	170.298	172.894	143.356	155.553	149.454	128.456		0	86.263	4757800000	2130000000	2627800000	8.8949	8.74337	9.11494	9.03439	0.181646	0.877679	0.293371	0.417838	0.254594	0.0361869	0.288654	0.277628	0.838223	0.975229	0.818666	0.824946
	NHP2L1	NHP2-like protein 1;NHP2-like protein 1, N-terminally processed					0	0	0	0	0	YES	177.653	199.331	188.492	78.339	84.0851	81.212	143.222	119.932	131.577	117.858	105.091	111.474	128.189		0	45.385	5634800000	2468900000	3165900000	8.98715	8.63798	9.02342	8.85527	0.266991	0.510164	0.519395	0.317311	0.210264	0.154842	0.171719	0.340619	0.864379	0.89823	0.887784	0.789702
	TMOD3	Tropomodulin-3					0	0	0	0	0	YES	219.95	232.328	226.139	42.3738	64.2644	53.3191	130.525	139.66	135.092	126.462	68.4737	97.4676	128.005		0	54.362	4077600000	1820200000	2257500000	9.03423	8.55506	8.94962	8.89362	0.81662	0.606889	0.531321	0.297558	-0.0599761	0.178874	0.166458	0.354452	1.04245	0.883392	0.891027	0.782167
	MYH10	Myosin-10					0	0	0	0	0	YES	263.577	171.698	217.638	66.8441	70.9199	68.882	140.719	68.254	104.486	155.524	85.3476	120.436	127.861		0	135.71	4129700000	1863000000	2266700000	9.05591	8.66575	8.94091	8.9125	0.176563	0.545994	0.265805	0.192907	0.24184	0.141956	0.306496	0.440846	0.845666	0.90629	0.808604	0.736703
	ANP32B	Acidic leucine-rich nuclear phosphoprotein 32 family member B					0	0	0	0	0	YES	78.5216	96.0207	87.2712	222.491	174.336	198.414	123.151	102.202	112.676	122.121	100.442	111.281	127.411		0	9.3882	5645900000	2280800000	3365100000	8.74614	9.09719	8.96397	8.92162	0.189637	0.47253	0.32094	0.317643	0.24987	0.168899	0.271904	0.340391	0.840972	0.889521	0.828226	0.789827
	DSC1	Desmocollin-1			0		0	1	1	0	1	NO	0	0	0	0	0	0	516.128	497.426	506.777	0	0	0	126.694		0	51.31	1391100000	1249700000	141480000	NaN	NaN	9.14336	NaN	1	1	9.66134e-31	1	NaN	NaN	-3.80269	NaN	NaN	NaN	13.9548	NaN
	STMN1	Stathmin					0	0	0	0	0	YES	136.565	154.52	145.542	221.401	70.483	145.942	32.1548	149.856	91.0055	99.5065	148.576	124.041	126.633		0	17.904	5289500000	1859800000	3429700000	8.92897	8.97609	8.84426	8.98138	0.010187	0.11376	0.174312	0.196994	0.496922	0.371838	0.377179	0.436908	0.708617	0.772798	0.769941	0.738716	+
	PC	Pyruvate carboxylase, mitochondrial					0	0	0	0	0	YES	103.317	162.656	132.986	105.908	159.211	132.559	163.521	126.037	144.779	94.8677	97.2188	96.0433	126.592		0	78.225	4918400000	2243300000	2675100000	8.85156	9.02576	8.95556	8.78111	0.363585	0.568464	0.758894	0.641032	-0.212317	0.134089	-0.114519	0.163499	1.15855	0.911245	1.08261	0.892857
	EIF3J	Eukaryotic translation initiation factor 3 subunit J					0	0	0	0	0	YES	117.024	71.4516	94.2376	201.845	189.615	195.73	130.29	0	65.1449	148.104	149.764	148.934	126.012		0	116.49	4814500000	2379900000	2434600000	8.73051	8.97169	8.5649	8.98661	0.404767	0.345539	0.738196	0.548506	0.155879	-0.210513	-0.123497	-0.230059	0.897586	1.1571	1.08937	1.17288
	RAB7A	Ras-related protein Rab-7a					0	0	0	0	0	YES	86.108	115.85	100.979	135.564	135.618	135.591	155.75	87.337	121.543	144.711	147.024	145.868	125.995		0	21.789	4254900000	2215000000	2039800000	8.73986	8.83853	8.79873	8.83756	0.390013	0.535224	0.174224	0.157419	-0.201294	-0.138378	-0.460271	-0.553998	1.14973	1.10067	1.3758	1.46815
	PSMD14	26S proteasome non-ATPase regulatory subunit 14					0	0	0	0	0	YES	137.098	148.265	142.682	35.9705	224.381	130.176	154.907	93.718	124.313	120.734	89.4815	105.108	125.569		0	30.642	4691700000	2226200000	2465600000	8.85557	9.00363	8.87526	8.76236	0.980585	0.579142	0.934768	0.89588	-0.0132469	-0.12378	0.00992034	-0.0433188	1.00922	1.08959	0.993147	1.03048
	PUF60	Poly(U)-binding-splicing factor PUF60					0	0	0	0	0	YES	136.772	98.2417	117.507	178.598	244.169	211.383	89.1828	104.459	96.8207	73.8796	76.2007	75.0401	125.188		0	53.674	3993400000	1878900000	2114600000	8.8236	9.11093	8.76954	8.66174	0.795245	0.356454	0.71896	0.792997	0.0432046	-0.205796	-0.131914	0.0958569	0.970497	1.15332	1.09575	0.935716
	SSRP1	FACT complex subunit SSRP1					0	0	0	0	0	YES	139.454	116.81	128.132	99.3686	126.505	112.937	140.937	106.431	123.684	157.938	110.785	134.361	124.779		0	68.321	4987700000	2130500000	2857200000	8.97206	8.95268	8.93247	8.95381	0.0258455	0.354147	0.152124	0.229142	0.429964	0.217851	0.39835	0.407842	0.74228	0.859845	0.758725	0.75375	+
	PSMD5	26S proteasome non-ATPase regulatory subunit 5					0	0	0	0	0	YES	151.457	137.795	144.626	64.6406	56.3801	60.5103	137.291	138.978	138.134	138.834	170.941	154.887	124.54		0	32.313	4645800000	2139300000	2506500000	8.88942	8.77413	8.93203	9.01645	0.550286	0.440656	0.883778	1	0.109561	0.181293	0.0284276	0.00877379	0.92687	0.881912	0.980488	0.993937
	EEF1E1;EEF1E1-BLOC1S5	Eukaryotic translation elongation factor 1 epsilon-1					0	0	0	0	0	YES	151.449	33.4241	92.4366	67.4903	43.4568	55.4736	90.5847	219.666	155.125	275.153	114.436	194.794	124.457		0	39.818	3480800000	1526500000	1954300000	8.6775	8.61053	8.95288	9.063	0.349984	0.577225	0.380033	0.67376	0.175812	0.131063	0.238909	0.148479	0.885269	0.913159	0.847386	0.902201
	C14orf166	UPF0568 protein C14orf166					0	0	0	0	0	YES	123.933	117.18	120.556	181.046	99.6792	140.363	131.035	117.359	124.197	93.5905	129.601	111.596	124.178		0	78.14	5814500000	2959000000	2855500000	8.7972	8.97269	8.98552	8.87852	0.251565	0.959212	0.63522	0.680214	-0.2659	-0.0114134	-0.169566	-0.155293	1.20239	1.00794	1.12472	1.11365
	PSME3	Proteasome activator complex subunit 3					0	0	0	0	0	YES	148.202	164.559	156.381	103.275	154.438	128.857	102.286	106.642	104.464	112.302	98.969	105.636	123.834		0	25.397	3934600000	1837900000	2096800000	8.84698	9.01728	8.84248	8.82174	0.556647	0.819903	0.635159	0.481326	-0.14011	0.0535284	0.122871	0.24245	1.10199	0.963577	0.918358	0.845309
	MARCKS	Myristoylated alanine-rich C-kinase substrate					0	0	0	0	0	YES	117.565	112.051	114.808	98.2019	135.156	116.679	109.157	138.799	123.978	134.877	144.743	139.81	123.819		0	68.676	4000600000	2188700000	1811900000	8.72727	8.82953	8.83092	8.86378	0.0467062	0.0949568	0.191594	0.113735	-0.455554	-0.372655	-0.442889	-0.620801	1.37131	1.29473	1.35932	1.53773	+
	PFDN6	Prefoldin subunit 6					0	0	0	0	0	YES	143.665	85.4223	114.543	73.9965	60.842	67.4192	142.939	190.513	166.726	134	158.8	146.4	123.772		0	26.756	3870400000	1493900000	2376500000	8.81235	8.54659	9.06157	9.158	0.540344	0.913964	0.877921	0.967532	0.1125	0.00432164	-0.0641179	-0.0141353	0.924984	0.997009	1.04545	1.00985
	AIMP1	Aminoacyl tRNA synthase complex-interacting multifunctional protein 1;Endothelial monocyte-activating polypeptide 2					0	0	0	0	0	YES	117.191	97.1085	107.15	89.2068	152.921	121.064	93.8745	133.814	113.844	158.032	147.491	152.762	123.705		0	69.966	3955300000	1953100000	2002200000	8.74803	8.90439	8.83063	9.02317	0.976612	0.686446	0.717845	0.927893	-0.0143684	0.0949116	-0.132404	-0.0272486	1.01001	0.93633	1.09612	1.01907
	TMED9	Transmembrane emp24 domain-containing protein 9					0	0	0	0	0	YES	114.453	70.2959	92.3742	54.0706	21.5928	37.8317	248.133	117.854	182.994	168.289	191.816	180.053	123.313		0	56.756	3078800000	1884300000	1194400000	8.62799	8.42441	9.07987	8.84262	0.089963	0.124815	0.000680122	0.00348324	-0.389508	0.465191	-1.13043	-1.15415	1.30995	0.724375	2.18924	2.22554
	DNM1L	Dynamin-1-like protein					0	0	0	0	0	YES	191.224	235.659	213.441	78.5309	52.1564	65.3436	117.43	133.368	125.399	61.5774	115.91	88.7435	123.232		0	72.756	3503500000	1676700000	1826800000	9.03294	8.63921	8.92514	8.71134	0.687609	0.642037	0.538683	0.651082	0.0712136	0.109294	0.163241	0.158854	0.951837	0.927042	0.893017	0.895736
	EDF1	Endothelial differentiation-related factor 1					0	0	0	0	0	YES	112.574	57.9418	85.2579	241.357	151.066	196.211	141.197	109.76	125.478	101.105	68.4673	84.7862	122.933		0	12.473	3408500000	1675800000	1732700000	8.64515	8.98232	8.98589	8.65567	0.327531	0.0272299	0.226508	0.62322	-0.228199	-0.492809	-0.411176	-0.186787	1.17137	1.40718	1.32977	1.13823		+
	PRPS1	Ribose-phosphate pyrophosphokinase 1					0	0	0	0	0	YES	129.727	132.53	131.129	164.683	220.62	192.651	146.342	32.4782	89.4102	73.125	83.5657	78.3454	122.884		0	71.385	4503800000	1964400000	2539400000	8.88531	9.09954	8.84903	8.7836	0.511183	0.370025	0.108284	0.109597	0.121281	0.210763	0.448373	0.539729	0.919371	0.86408	0.732869	0.6879
	PPA2	Inorganic pyrophosphatase 2, mitochondrial					0	0	0	0	0	YES	153.686	170.648	162.167	118.495	110.009	114.252	127.421	121.207	124.314	91.0987	88.5154	89.807	122.635		0	61.973	3989500000	1958600000	2030900000	8.88121	8.81671	8.86628	8.74754	0.637364	0.772692	0.889276	0.599147	-0.113895	0.067914	-0.0593897	0.183201	1.08215	0.954016	1.04202	0.880747
	BLVRA	Biliverdin reductase A					0	0	0	0	0	YES	150.295	57.484	103.89	234.388	166.374	200.381	89.037	105.595	97.316	90.0566	86.3138	88.1852	122.443		0	136.94	3891200000	1813200000	2078000000	8.79521	8.97684	8.84995	8.75906	0.671246	0.772897	0.435137	0.780504	0.0756011	-0.0644045	0.210888	0.101247	0.948947	1.04565	0.864005	0.932227
	SUCLG1	Succinyl-CoA ligase [ADP/GDP-forming] subunit alpha, mitochondrial					0	0	0	0	0	YES	168.348	140.318	154.333	89.5445	145.582	117.563	102.051	128.497	115.274	102.194	99.6105	100.902	122.018		0	28.484	4509300000	2245700000	2263600000	8.85834	9.03064	8.79718	8.86589	0.656055	0.794784	0.768483	0.811567	-0.108036	0.0611541	-0.110386	-0.0861245	1.07776	0.958497	1.07952	1.06151
	GNPNAT1	Glucosamine 6-phosphate N-acetyltransferase					0	0	0	0	0	YES	179.069	0	89.5347	247.85	239.323	243.586	82.1979	52.5499	67.3739	99.961	71.6264	85.7937	121.572		0	30.434	3038800000	1396200000	1642600000	8.6175	9.10718	8.70252	8.76791	0.619415	0.822847	0.0463661	0.122582	-0.119589	-0.0499646	0.559443	0.521151	1.08643	1.03524	0.678564	0.696816
	SRSF7	Serine/arginine-rich splicing factor 7					0	0	0	0	0	YES	95.0468	129.327	112.187	24.7673	64.7776	44.7724	228.953	137.086	183.02	215.695	67.3919	141.544	120.381		0	43.902	4447100000	1918700000	2528400000	8.80573	8.3934	9.13953	9.0849	0.372268	0.355803	0.982175	0.683829	0.167486	0.293606	-0.0209697	0.143916	0.890393	0.81586	1.01464	0.905059
	CAPNS1	Calpain small subunit 1					0	0	0	0	0	YES	75.4993	134.282	104.891	110.981	55.1308	83.0558	175.149	64.9888	120.069	196.694	149.693	173.193	120.302		0	46.382	3963200000	1901600000	2061600000	8.90781	8.75172	9.03595	9.00238	0.81413	0.771966	0.552704	0.53994	-0.0606982	-0.064676	0.157173	-0.235195	1.04297	1.04585	0.896781	1.17707
	BUB3	Mitotic checkpoint protein BUB3					0	0	0	0	0	YES	123.956	128.081	126.018	48.8393	73.2689	61.0541	203.785	123.715	163.75	156.285	103.467	129.876	120.175		0	58.293	4335900000	1850100000	2485800000	8.82823	8.63349	9.05987	9.03205	0.202927	0.142869	0.206033	0.321318	0.242328	0.344488	0.350158	0.337882	0.84538	0.787588	0.784498	0.791202
	AIMP2	Aminoacyl tRNA synthase complex-interacting multifunctional protein 2					0	0	0	0	0	YES	132.402	38.3244	85.363	243.475	195.172	219.324	59.7604	49.3197	54.54	133.686	108.084	120.885	120.028		0	37.79	3997800000	1887000000	2110800000	8.67634	9.08081	8.75909	8.92803	0.741598	0.683696	0.252832	0.871626	0.0569996	-0.0909258	0.315334	0.062398	0.961261	1.06505	0.803665	0.957671
	ARPC2	Actin-related protein 2/3 complex subunit 2					0	0	0	0	0	YES	181.274	207.029	194.152	59.0808	20.9527	40.0168	90.7791	119.932	105.356	174.291	104.37	139.331	119.714		0	26.93	3033100000	1450600000	1582400000	8.94098	8.35725	8.82756	8.94286	0.435431	0.810119	0.639437	0.884375	-0.183359	0.101919	0.121148	-0.0491135	1.13552	0.931793	0.919456	1.03463
	ELAVL1	ELAV-like protein 1					0	0	0	0	0	YES	148.472	160.601	154.537	222.215	104.965	163.59	56.7963	124.389	90.5927	80.4656	59.7544	70.11	119.707		0	111.73	6483500000	2647400000	3836100000	8.98497	9.18662	8.86481	8.85922	0.496129	0.0473655	0.0971232	0.0228546	0.125916	0.351855	0.463622	0.764006	0.916422	0.783576	0.725163	0.588859		+
	KHDRBS1	KH domain-containing, RNA-binding, signal transduction-associated protein 1					0	0	0	0	0	YES	120.327	114.022	117.175	196.542	197.709	197.125	101.872	86.9879	94.4301	66.9833	72.1499	69.5666	119.574		0	93.285	4964600000	2462600000	2502000000	8.75399	9.03559	8.76462	8.63736	0.899191	0.730246	0.696574	0.551247	-0.0362891	0.081067	0.0985544	0.206518	1.02547	0.945358	0.933968	0.866626
	ATAD3A	ATPase family AAA domain-containing protein 3A					0	0	0	0	0	YES	150.327	98.8989	124.613	100.512	149.248	124.88	168.156	106.675	137.415	114.536	63.3973	88.9664	118.969		0	48.106	4970700000	2335300000	2635400000	8.8838	9.05956	8.93623	8.75994	0.0992488	0.97244	0.154829	0.947684	-0.378907	-0.00771017	-0.481284	0.0305479	1.30036	1.00536	1.39599	0.979048
	ARPC5	Actin-related protein 2/3 complex subunit 5					0	0	0	0	0	YES	155.954	129.425	142.69	136.331	82.8974	109.614	155.823	59.8938	107.858	127.488	102.992	115.24	118.851		0	21.966	4043100000	1951900000	2091300000	8.82837	8.86568	8.95374	8.90074	0.836249	0.86373	0.480596	0.782371	-0.0543024	-0.0383026	0.189287	0.10044	1.03836	1.0269	0.877039	0.932749
	CDV3	Protein CDV3 homolog					0	0	0	0	0	YES	91.4171	95.0463	93.2317	39.4182	35.4625	37.4403	193.146	93.4663	143.306	218.798	177.997	198.398	118.094		0	55.131	3692900000	1885800000	1807100000	8.6704	8.39853	8.89983	8.98835	0.281797	0.53692	0.351574	0.258477	0.20364	-0.137965	-0.319838	-0.441027	0.868357	1.10035	1.24819	1.35757
	UBE2Z	Ubiquitin-conjugating enzyme E2 Z					0	0	0	0	0	YES	81.3242	67.4472	74.3857	225.561	220.253	222.907	101.297	90.9578	96.1274	91.3886	65.5958	78.4922	117.978		0	20.234	5212900000	2491000000	2721900000	8.65081	9.10343	8.77965	8.76834	0.197049	0.869201	0.614999	0.538016	0.245617	0.0387171	0.131063	0.213129	0.843455	0.97352	0.913159	0.862664
	CHMP4B	Charged multivesicular body protein 4b					0	0	0	0	0	YES	105.386	60.0139	82.7002	93.7965	80.1481	86.9723	153.919	215.395	184.657	107.35	126.576	116.963	117.823		0	55.066	3575900000	1825900000	1750000000	8.64355	8.65364	8.99413	8.82935	0.287419	0.674761	0.535572	0.99036	-0.247269	-0.0936481	-0.217273	0.0127832	1.18696	1.06707	1.16253	0.991178
	LRPAP1	Alpha-2-macroglobulin receptor-associated protein					0	0	0	0	0	YES	218.494	225.31	221.902	51.4871	83.2273	67.3572	120.242	89.0662	104.654	113.501	40.1744	76.8378	117.688		0	30.41	4045400000	2131200000	1914200000	9.08654	8.7025	8.80916	8.74265	0.121406	0.205593	0.947325	0.54913	-0.263473	0.297602	-0.0353426	-0.229687	1.20036	0.813603	1.0248	1.17258
	PDCD5	Programmed cell death protein 5					0	0	0	0	0	YES	51.3186	90.3551	70.8369	170.232	155.905	163.068	94.0771	141.186	117.631	92.2898	146.129	119.209	117.687		0	26.245	4414500000	1928200000	2486200000	8.68665	8.952	8.91624	8.8833	0.455509	0.862627	0.273204	0.356498	0.138814	0.040682	0.301588	0.314755	0.908265	0.972195	0.811359	0.803988
	CLTB	Clathrin light chain B					0	0	0	0	0	YES	145.782	82.2269	114.004	141.174	135.582	138.378	66.0298	111.781	88.9055	124.432	134.282	129.357	117.661		0	15.957	3172000000	1736900000	1435100000	8.77621	8.84671	8.67923	8.75415	0.783322	0.515689	0.298303	0.0391498	-0.069679	-0.145063	-0.355516	-0.812257	1.04948	1.10578	1.27944	1.75596
	SEPT11	Septin-11					0	0	0	0	0	YES	80.4646	122.354	101.41	41.9171	142.041	91.9789	191.452	108.42	149.936	123.625	127.614	125.619	117.236		0	91.699	4205700000	1968400000	2237400000	8.72295	8.82594	8.99144	8.94244	0.696384	0.175421	0.712958	0.721022	0.0688771	0.318577	0.0922074	-0.133369	0.95338	0.80186	0.938086	1.09685
	NUP93	Nuclear pore complex protein Nup93					0	0	0	0	0	YES	96.9412	89.3278	93.1345	66.7681	95.7422	81.2552	117.633	192.583	155.108	147.007	130.061	138.534	117.008		0	66.905	4023600000	1768200000	2255400000	8.69379	8.76583	9.10775	8.95534	0.881971	0.544516	0.597131	0.641866	-0.0411945	0.142479	0.138421	0.163112	1.02897	0.905961	0.908513	0.893096
	MAP2K1	Dual specificity mitogen-activated protein kinase kinase 1					0	0	0	0	0	YES	171.85	133.134	152.492	91.0718	182.525	136.799	100.025	92.687	96.3559	102.398	59.8114	81.1047	116.688		0	47.897	3477800000	1785100000	1692700000	8.86464	8.87589	8.80149	8.73383	0.449149	0.266219	0.989834	0.593462	-0.178159	-0.248125	-0.00996002	-0.203718	1.13144	1.18766	1.00693	1.15166
	GSTK1	Glutathione S-transferase kappa 1					0	0	0	0	0	YES	205.886	181.148	193.517	79.5056	172.965	126.235	44.4974	69.8436	57.1705	94.57	82.5837	88.5768	116.375		0	32.425	3323300000	1473200000	1850100000	8.97878	8.9905	8.60278	8.74452	0.215756	0.513001	0.130987	0.486379	-0.286463	0.153805	0.420833	0.239765	1.21965	0.898876	0.746993	0.846883
	LUC7L2	Putative RNA-binding protein Luc7-like 2					0	0	0	0	0	YES	77.6803	82.8539	80.2671	90.1125	115.449	102.781	131.214	186.592	158.903	132.088	113.271	122.68	116.158		0	44.555	4564600000	2026300000	2538300000	8.64581	8.76568	9.01928	8.89314	0.0743137	0.282546	0.566962	0.680943	0.342782	0.252658	0.151079	0.145221	0.788519	0.839349	0.900576	0.904241
	DNAJA2	DnaJ homolog subfamily A member 2					0	0	0	0	0	YES	114.333	124.938	119.636	44.2734	124.973	84.6232	110.915	152.308	131.612	128.381	126.94	127.661	115.883		0	52.366	4011300000	1738200000	2273000000	8.80647	8.77077	8.96048	8.92056	0.620954	0.776468	0.532495	0.781895	0.0893625	-0.063364	0.165944	-0.101428	0.939938	1.0449	0.891345	1.07283
	DNAJB11	DnaJ homolog subfamily B member 11 = ERdj3					0	0	0	0	0	YES	70.5787	57.4999	64.0393	29.3877	45.1936	37.2907	121.344	187.704	154.524	211.981	201.518	206.749	115.651		0	51.432	2952700000	1818800000	1133900000	8.45271	8.31927	8.81098	8.90252	0.658501	0.0106753	4.02708e-05	3.26542e-06	-0.107275	-0.678603	-1.36331	-1.84353	1.07719	1.60059	2.57274	3.58886		+
	SRP14	Signal recognition particle 14 kDa protein					0	0	0	0	0	YES	206.132	243.644	224.888	72.0286	0	36.0143	145.605	142.306	143.955	107.272	8.12137	57.6966	115.639		0	16.372	5518100000	2576100000	2942000000	9.16092	8.91289	9.1936	8.8935	0.00763389	0.974617	0.0657655	0.0106052	-0.446856	-0.00710107	0.424062	0.856787	1.36307	1.00493	0.745323	0.552181	+
	ACIN1	Apoptotic chromatin condensation inducer in the nucleus					0	0	0	0	0	YES	40.1758	65.7218	52.9488	222.514	195.986	209.25	180.221	60.3947	120.308	114.12	45.8463	79.9833	115.623		0	87.695	4201700000	2009100000	2192600000	8.42604	9.00647	8.84164	8.75639	0.320242	0.23547	0.76697	0.641866	0.226139	0.278936	0.0716254	0.163112	0.85492	0.824198	0.951565	0.893096
	UMPS	Uridine 5-monophosphate synthase;Orotate phosphoribosyltransferase;Orotidine 5-phosphate decarboxylase					0	0	0	0	0	YES	32.7597	205.934	119.347	135.787	166.711	151.249	80.019	126.63	103.324	122.363	53.0379	87.7007	115.405		0	42.509	4184600000	1966600000	2218000000	8.82892	8.91888	8.81436	8.82216	0.472227	0.719817	0.0841265	0.340035	0.133432	0.0843364	0.483261	0.325386	0.91166	0.943218	0.715359	0.798085
	CLIP1	CAP-Gly domain-containing linker protein 1					0	0	0	0	0	YES	22.0539	60.378	41.216	195.705	203.721	199.713	113.679	142.939	128.309	111.244	73.2372	92.2409	115.37		0	54.716	3735600000	2041400000	1694200000	8.3753	8.93697	8.78967	8.657	0.608187	1.95428e-06	0.00481192	0.0119511	-0.15793	-1.06187	-0.940396	-0.991771	1.11569	2.08764	1.91905	1.98863		+
	ASNA1	ATPase ASNA1					0	0	0	0	0	YES	152.946	189.617	171.281	34.7732	25.1808	29.977	83.6079	202.796	143.202	113.376	119.924	116.65	115.277		0	33.014	2790900000	1378200000	1412600000	8.87325	8.16468	8.97586	8.82356	0.916093	0.364018	0.536412	0.825615	0.0129261	-0.219035	-0.216854	-0.0789293	0.99108	1.16395	1.1622	1.05623
	RBM39	RNA-binding protein 39					0	0	0	0	0	YES	130.73	153.274	142.002	96.6823	78.8284	87.7554	153.473	34.5751	94.024	185.794	84.421	135.108	114.722		0	144.82	3979700000	1493200000	2486500000	8.95431	8.90421	8.89201	8.96876	8.85423e-08	0.00392648	0.00195765	0.0936995	1.04286	0.678072	0.877194	0.565012	0.485366	0.625	0.544425	0.67595	+	+
	HIST2H2BE;HIST1H2BB;HIST1H2BO;HIST1H2BJ;HIST3H2BB	Histone H2B type 2-E;Histone H2B type 1-B;Histone H2B type 1-O;Histone H2B type 1-J;Histone H2B type 3-B	0				0	0	0	0	1	NO	285.602	284.837	285.219	83.5733	97.6118	90.5926	164.526	0	82.2628	0	0	0	114.519		0.0020094	0.18752	3865800000	1498100000	2367700000	9.21418	8.80052	8.87174	NaN	0.022489	0.0198442	1	1	0.415001	0.547647	NaN	NaN	0.750019	0.684135	NaN	NaN	+	+
	SEC16A	Protein transport protein Sec16A					0	0	0	0	0	YES	66.6402	71.1978	68.919	108.985	183.574	146.28	142.615	102.754	122.684	124.15	113.533	118.841	114.181		0	74.006	3806900000	2018900000	1788000000	8.49856	8.95105	8.83267	8.80609	0.551488	0.113474	0.238104	0.363197	-0.141844	-0.353229	-0.401425	-0.353174	1.10331	1.27742	1.32081	1.27737
	PCMT1	Protein-L-isoaspartate O-methyltransferase;Protein-L-isoaspartate(D-aspartate) O-methyltransferase					0	0	0	0	0	YES	59.5863	107.526	83.556	166.08	130.897	148.488	89.8635	91.1607	90.5121	132.534	134.725	133.63	114.047		0	61.401	5016800000	2489700000	2527200000	8.62743	8.97982	8.77023	8.83068	0.74214	0.830042	0.729548	0.667362	-0.0818427	0.0504668	0.0858326	-0.162299	1.05837	0.965624	0.942241	1.11907
	LAP3	Cytosol aminopeptidase					0	0	0	0	0	YES	97.0287	145.969	121.499	37.8087	147.473	92.641	75.3735	119.542	97.4579	129.188	157.771	143.48	113.769		0	160.29	3606000000	1790800000	1815200000	8.84676	8.89478	8.88807	8.89789	0.81792	0.574378	0.896608	0.394029	0.0374524	-0.125337	-0.0563411	-0.330502	0.974374	1.09076	1.03983	1.25745
	SF3A1	Splicing factor 3A subunit 1					0	0	0	0	0	YES	112.98	123.027	118.003	105.555	148.338	126.947	144.106	92.622	118.364	105.297	73.6427	89.4699	113.196		0	43.715	4188100000	2121300000	2066700000	8.79507	8.8817	8.80639	8.74158	0.889932	0.780455	0.948265	0.901347	-0.0389249	-0.0622037	0.0050406	0.0499095	1.02735	1.04406	0.996512	0.965997
	CDA	Cytidine deaminase					0	0	0	0	0	YES	141.515	120.995	131.255	86.298	139.863	113.081	106.216	108.42	107.318	104.443	96.1814	100.312	112.991		0	51.106	4188800000	1999400000	2189400000	8.77728	8.80676	8.8379	8.79709	0.975427	0.378877	0.786402	0.69866	-0.00171784	0.206893	0.0643311	0.137241	1.00119	0.866401	0.956389	0.909256
	SEC24D	Protein transport protein Sec24D					0	0	0	0	0	YES	101.502	54.4979	78	111.042	191.77	151.406	141.448	64.3727	102.91	147.258	88.9905	118.124	112.61		0	82.256	4928600000	2704600000	2224000000	8.57904	8.96276	8.81183	8.82176	0.18279	0.0345445	0.047427	0.0670646	-0.307698	-0.471709	-0.665295	-0.72016	1.23773	1.38675	1.58589	1.64737		+
	CLIC4	Chloride intracellular channel protein 4					0	0	0	0	0	YES	119.658	114.143	116.901	66.7152	117.077	91.896	150.483	90.9902	120.737	126.751	114.982	120.867	112.6		0	55.955	3225200000	1673300000	1551900000	8.73798	8.84739	8.81214	8.82089	0.341371	0.0220614	0.654993	0.338207	-0.221976	-0.510909	-0.160508	-0.372449	1.16633	1.42495	1.11768	1.29455		+
	PAK2	Serine/threonine-protein kinase PAK 2;PAK-2p27;PAK-2p34					0	0	0	0	0	YES	71.2274	87.8169	79.5222	166.563	114.804	140.684	92.0027	107.138	99.5701	125.145	134.662	129.903	112.42		0	34.773	3570300000	1740100000	1830100000	8.7562	9.0465	8.77404	8.92635	0.795992	0.736863	0.613066	0.580843	-0.0659743	-0.074988	-0.179858	-0.211014	1.04679	1.05335	1.13277	1.1575
	ESD	S-formylglutathione hydrolase					0	0	0	0	0	YES	86.5379	86.9104	86.7241	212.736	61.897	137.317	164.493	93.5719	129.032	97.3438	94.3282	95.836	112.227		0	44.581	5058200000	2205800000	2852300000	8.81162	9.07584	9.03743	8.86975	0.112275	0.935384	0.476775	0.523061	0.304161	0.0190613	0.191057	0.220701	0.809913	0.986875	0.875964	0.858148
	GDI1	Rab GDP dissociation inhibitor alpha					0	0	0	0	0	YES	61.1313	72.4828	66.807	98.1866	73.4031	85.7948	106.556	104.434	105.495	140.981	227.256	184.118	110.554		0	82.205	3174800000	1492000000	1682800000	8.51985	8.65921	8.76294	9.01949	0.806818	0.714436	0.510499	0.174682	-0.0628213	-0.0816595	-0.229941	-0.531511	1.04451	1.05823	1.17279	1.44544
	IDE	Insulin-degrading enzyme					0	0	0	0	0	YES	109.414	122.906	116.16	46.6335	156.257	101.445	86.6952	129.625	108.16	108.267	122.878	115.572	110.334		0	36.862	3971800000	1949000000	2022800000	8.89667	8.92499	8.82869	8.86682	0.801856	0.751316	0.329572	0.996261	0.0415233	-0.0707241	-0.334116	0.00690831	0.971628	1.05024	1.2606	0.995223
	BCLAF1	Bcl-2-associated transcription factor 1					0	0	0	0	0	YES	70.0955	98.5514	84.3234	126.577	84.8329	105.705	179.322	122.171	150.747	120.608	79.3922	100	110.194		0	51.383	5587900000	2449800000	3138100000	8.70315	8.86041	9.04798	9.02539	0.413758	0.970678	0.581408	0.7379	0.152768	-0.00820338	-0.194856	0.119821	0.899523	1.0057	1.14461	0.920302
	CFL2	Cofilin-2					0	0	0	0	0	YES	16.1072	71.9321	44.0197	191.154	192.086	191.62	80.1689	132.239	106.204	115.601	73.7987	94.6999	109.136		0	47.46	3648700000	1940200000	1708500000	8.41254	9.03814	8.75602	8.74899	0.304097	0.263487	0.411632	0.681249	-0.299223	-0.249548	-0.28351	-0.154731	1.23048	1.18883	1.21715	1.11321
	UNC45A	Protein unc-45 homolog A					0	0	0	0	0	YES	147.812	138.128	142.97	88.7847	92.8023	90.7935	79.7467	135.462	107.605	94.0058	94.7559	94.3808	108.937		0	39.701	3769400000	1736600000	2032800000	8.86994	8.8303	8.91135	8.82696	0.899387	0.568084	0.502554	0.575512	0.0170666	0.134221	0.179256	0.194591	0.98824	0.911162	0.883158	0.87382
	RDX	Radixin					0	0	0	0	0	YES	19.3293	151.861	85.5952	97.1121	106.945	102.028	107.788	84.1546	95.9711	171.995	130.797	151.396	108.748		0	56.674	3684300000	1780500000	1903800000	8.63571	8.80864	8.78522	8.93725	0.645588	0.657729	0.707357	0.93156	0.0825663	-0.0988763	0.0943712	-0.0254119	0.944376	1.07094	0.93668	1.01777
	ALDH1B1	Aldehyde dehydrogenase X, mitochondrial					0	0	0	0	0	YES	164.567	155.313	159.94	76.8117	120.347	98.5792	97.3183	56.7593	77.0388	127.159	70.193	98.676	108.559		0	32.487	3760400000	1897800000	1862600000	8.85058	8.70561	8.90947	8.91453	0.183651	0.858879	0.771349	0.770892	-0.307109	0.0418037	0.0699771	0.10541	1.23723	0.97144	0.952653	0.929541
	SGTA	Small glutamine-rich tetratricopeptide repeat-containing protein alpha					0	0	0	0	0	YES	142.63	161.953	152.292	96.383	160.098	128.241	79.639	64.0414	71.8402	80.779	80.6672	80.7231	108.274		0	14.068	5051300000	2439700000	2611600000	8.89327	8.90421	8.67017	8.77993	0.618033	0.713336	0.754631	0.685274	0.0901759	0.0863761	0.0762854	0.143263	0.939408	0.941886	0.948497	0.905469
	HN1	Hematological and neurological expressed 1 protein;Hematological and neurological expressed 1 protein, N-terminally processed					0	0	0	0	0	YES	82.1919	119.386	100.789	97.5879	75.5292	86.5586	106.386	125.915	116.15	115.374	141.37	128.372	107.967		0	40.784	3256700000	1887200000	1369600000	8.66922	8.73595	8.78012	8.75722	0.163954	0.232956	0.4261	0.206628	-0.321135	-0.266195	-0.275245	-0.493926	1.24931	1.20263	1.2102	1.40827
	PSPH	Phosphoserine phosphatase					0	0	0	0	0	YES	65.4478	45.7305	55.5892	180.524	148.58	164.552	139.681	83.4808	111.581	98.6054	99.2937	98.9495	107.668		0	29.133	3730600000	1902700000	1827800000	8.59478	8.93256	8.8099	8.70135	0.000827962	0.818526	0.395673	0.543102	0.648926	-0.0512049	-0.292829	-0.233295	0.637755	1.03613	1.22504	1.17552	+
	SNRPN;SNRPB	Small nuclear ribonucleoprotein-associated proteins B and B;Small nuclear ribonucleoprotein-associated protein N					0	0	0	0	0	YES	153.471	144.979	149.225	3.60335	27.2571	15.4302	130.006	121.109	125.558	131.093	148.948	140.02	107.558		0	27.909	3918800000	1727100000	2191600000	8.91849	8.23795	8.93254	8.96658	0.360831	0.676176	0.58832	0.223368	0.171719	-0.0821635	0.142087	0.412836	0.887784	1.0586	0.906208	0.751146
	SNX6	Sorting nexin-6;Sorting nexin-6, N-terminally processed					0	0	0	0	0	YES	80.8069	84.9464	82.8766	118.502	172.686	145.594	92.5132	99.5794	96.0463	121.533	89.8854	105.709	107.557		0	33.354	3865100000	1660300000	2204900000	8.63288	9.10054	8.8382	8.81288	0.88849	0.907152	0.304086	0.707766	0.0197731	-0.0260288	0.282025	0.133169	0.986388	1.01821	0.822436	0.911826
	RAB5C;RAB5B;RAB5A	Ras-related protein Rab-5C;Ras-related protein Rab-5B;Ras-related protein Rab-5A					0	0	0	0	0	YES	180.168	243.062	211.615	90.2429	57.5964	73.9197	65.0023	74.4094	69.7058	76.3628	69.3884	72.8756	107.029		0	11.883	2886800000	1533200000	1353600000	8.98426	8.67851	8.6001	8.58095	0.120684	0.364354	0.166896	0.20694	-0.35716	-0.202439	-0.467992	-0.493581	1.2809	1.15064	1.38318	1.40794
	LRRC47	Leucine-rich repeat-containing protein 47					0	0	0	0	0	YES	188.183	110.525	149.354	66.26	71.7792	69.0196	112.568	78.8582	95.7133	78.3656	149.463	113.914	107		0	41.283	4026500000	1808600000	2217800000	8.93547	8.68698	8.83544	8.91549	0.343384	0.0968736	0.392406	0.586989	-0.221085	0.390338	0.232415	0.189034	1.16561	0.762951	0.851209	0.877193
	EIF4E	Eukaryotic translation initiation factor 4E					0	0	0	0	0	YES	120.653	168.17	144.412	47.0801	55.5655	51.3228	107.877	121.767	114.822	133.075	99.2224	116.149	106.676		0	11.793	3495700000	1549700000	1946100000	8.89831	8.43813	8.94518	8.92847	0.597803	0.926275	0.425277	0.272892	0.0958569	0.0604624	0.215741	0.372618	0.935716	0.958957	0.861104	0.77238
	SLIRP	SRA stem-loop-interacting RNA-binding protein, mitochondrial					0	0	0	0	0	YES	150.375	174.199	162.287	74.6358	96.1015	85.3686	68.6544	116.563	92.6087	69.5738	101.907	85.7405	106.501		0	19.036	3171500000	1654000000	1517500000	8.87949	8.75584	8.72018	8.70034	0.102586	0.920032	0.5387	0.585964	-0.375291	-0.022405	-0.215714	-0.208044	1.2971	1.01565	1.16128	1.15512
	ENO2	Gamma-enolase;Enolase					0	0	0	0	0	YES	24.6599	15.724	20.1919	38.2991	18.6052	28.4522	200.698	111.432	156.065	243.896	195.087	219.492	106.05		0	46.291	3366300000	1879800000	1486500000	8.1498	8.06123	8.86516	9.01246	0.00288491	0.176197	0.0514716	0.0235829	0.712464	-0.343275	-0.653809	-0.892366	0.610277	1.26863	1.57332	1.85622	+
	CAPZA2	F-actin-capping protein subunit alpha-2					0	0	0	0	0	YES	152.412	130.8	141.606	55.4666	133.294	94.3804	67.2898	151.309	109.3	89.3749	64.194	76.7844	105.518		0	76.311	3496300000	1765500000	1730700000	8.86957	8.6793	8.81515	8.67213	0.415475	0.241642	0.931205	0.347832	-0.191096	-0.26131	0.0112093	0.320311	1.14163	1.19857	0.99226	0.800897
	CDK5	Cyclin-dependent-like kinase 5					0	0	0	0	0	YES	118.974	183.921	151.447	27.1512	113.177	70.1639	101.945	98.1425	100.044	78.2308	117.627	97.929	104.896		0	16.771	3503800000	1636800000	1867000000	8.87734	8.77791	8.91278	8.88974	0.156599	0.474148	0.229673	0.49824	-0.326697	-0.159734	0.331935	0.23352	1.25414	1.11708	0.79447	0.850557
	DYNLRB1;DYNLRB2	Dynein light chain roadblock-type 1;Dynein light chain roadblock-type 2					0	0	0	0	0	YES	183.336	160.269	171.802	29.3654	36.6495	33.0075	191.582	85.8107	138.696	60.6842	91.1446	75.9144	104.855		0	27.931	3732100000	1903000000	1829200000	8.95045	8.22029	8.92467	8.63972	0.621233	0.646809	0.597894	0.58582	-0.119009	-0.0934788	-0.187001	-0.208128	1.08599	1.06694	1.13839	1.15519
	GPS1	COP9 signalosome complex subunit 1					0	0	0	0	0	YES	30.0518	53.9532	42.0025	82.2225	84.3564	83.2895	454.73	39.6369	247.184	36.6652	56.5993	46.6322	104.777		0	33.673	2358800000	1430700000	928070000	8.35367	8.57978	8.90966	8.59254	0.670893	0.16812	0.644724	0.581493	-0.133859	-0.307591	0.119024	0.191689	1.09723	1.23764	0.92081	0.87558
	NOP2	Probable 28S rRNA (cytosine(4447)-C(5))-methyltransferase					0	0	0	0	0	YES	41.2774	81.8718	61.5746	69.6409	101.989	85.8148	181.688	160.418	171.053	97.8532	102.612	100.233	104.669		0	42.338	3568300000	1703800000	1864500000	8.45905	8.65163	9.01017	8.84494	0.713483	1	0.762258	0.820514	-0.0904343	0	-0.113068	0.0840642	1.06469	1	1.08153	0.943396
	UQCRH	Cytochrome b-c1 complex subunit 6, mitochondrial					0	0	0	0	0	YES	17.5535	16.7679	17.1607	7.38038	28.4859	17.9331	176.51	249.257	212.884	109.991	230.732	170.362	104.585		0	102.27	3235800000	1541700000	1694200000	7.91192	8.1839	9.08593	8.97133	0.135252	0.834259	0.682944	0.885973	-0.427071	-0.0239444	-0.147889	-0.0483078	1.3445	1.01674	1.10795	1.03405
	TSFM	Elongation factor Ts, mitochondrial;Elongation factor Ts					0	0	0	0	0	YES	227.321	162.233	194.777	65.0282	42.992	54.0101	137.939	84.869	111.404	51.3071	64.3786	57.8428	104.508		0	33.234	3298100000	1551000000	1747100000	8.996	8.59496	8.81708	8.62869	0.792577	0.437138	0.784928	0.258528	-0.0669713	0.182692	0.0648829	0.383718	1.04752	0.881057	0.956023	0.76646
	MYH1;MYH2;MYH7;MYH4;MYH6	Myosin-1;Myosin-2;Myosin-7;Myosin-4;Myosin-6			0		0	0	1	0	0	NO	87.501	0	43.7505	0	0	0	410.39	148.168	279.279	0	187.975	93.9877	104.254		0.0020263	0.2568	2406900000	1036300000	1370700000	8.28702	NaN	9.23732	8.68677	1	1	0.737418	1	NaN	NaN	-0.0896511	NaN	NaN	NaN	1.06411	NaN
	MAGEB2	Melanoma-associated antigen B2					0	0	0	0	0	YES	17.6745	175.234	96.454	297.737	158.221	227.979	49.416	47.0952	48.2556	36.1503	43.1648	39.6576	103.087		0	13.476	3844300000	1902000000	1942300000	8.69748	9.16376	8.50688	8.44512	0.0615039	0.432663	0.795175	0.741964	-0.428741	-0.17511	-0.0985055	0.143132	1.34606	1.12905	1.07066	0.905551
	KPNA2;POU2F2	Importin subunit alpha-1					0	0	0	0	0	YES	168.785	112.587	140.686	95.6922	54.4335	75.0629	104.036	52.8227	78.4293	115.852	117.469	116.66	102.71		0	93.465	4078200000	1513800000	2564500000	8.95649	8.8392	8.87302	8.9633	0.137221	0.000471711	0.000956391	0.159867	0.284159	0.822037	0.936591	0.475189	0.82122	0.565643	0.522466	0.719373		+
	DDAH1	N(G),N(G)-dimethylarginine dimethylaminohydrolase 1					0	0	0	0	0	YES	131.717	140.311	136.014	14.5918	60.9161	37.7539	112.763	76.5177	94.6403	187.346	95.4528	141.399	102.452		0	40.89	3011400000	1362900000	1648500000	8.8032	8.50455	8.7564	8.87533	0.509312	0.806232	0.686227	0.771296	-0.156338	-0.0340126	0.102591	-0.106933	1.11445	1.02386	0.931359	1.07694
	PROSC	Proline synthase co-transcribed bacterial homolog protein					0	0	0	0	0	YES	109.74	106.581	108.161	107.688	75.4706	91.5794	105.746	112.691	109.218	111.644	90.0438	100.844	102.451		0	14.475	3053200000	1553400000	1499800000	8.6968	8.6246	8.81369	8.81384	0.878206	0.139342	0.656716	0.755059	0.0223323	-0.329903	0.114234	-0.11541	0.98464	1.25693	0.923873	1.08328
	MCM5	DNA replication licensing factor MCM5					0	0	0	0	0	YES	187.316	111.129	149.222	180.002	135.904	157.953	60.6315	43.4607	52.0461	37.9001	61.9322	49.9162	102.284		0	37.443	3870500000	1713100000	2157400000	9.01532	8.95972	8.70393	8.71336	0.787562	0.166074	0.00750619	0.0302362	0.0451634	0.325617	0.755486	0.727877	0.96918	0.797957	0.592347	0.603792
	DDX46	Probable ATP-dependent RNA helicase DDX46					0	0	0	0	0	YES	109.565	289.188	199.377	0	62.7951	31.3976	102.658	83.9679	93.3131	79.6193	83.0272	81.3233	101.353		0	33.041	3700400000	1650400000	2049900000	9.05335	8.56496	8.86377	8.94279	0.374138	0.293827	0.484713	0.428239	0.155749	0.329066	0.187388	0.271665	0.897666	0.796052	0.878194	0.828363
	CAST	Calpastatin					0	0	0	0	0	YES	130.937	77.7979	104.367	84.1574	68.0636	76.1105	139.074	89.4315	114.253	94.7737	125.927	110.35	101.27		0	35.787	3086800000	1499500000	1587300000	8.7838	8.50596	8.8569	8.78897	0.424953	0.531682	0.39675	0.588442	-0.187395	-0.140189	-0.292193	-0.206612	1.13871	1.10205	1.2245	1.15397
	PFN2	Profilin-2;Profilin					0	0	0	0	0	YES	83.9494	82.9219	83.4356	156.216	130.479	143.347	87.2948	92.3176	89.8062	83.3954	92.5448	87.9701	101.14		0	35.59	2229900000	991390000	1238500000	8.28461	8.61443	8.39782	8.36708	0.860095	0.534607	0.963127	0.821463	0.0258793	0.146004	-0.0241057	-0.0759305	0.982222	0.903751	1.01685	1.05404
	LRRFIP1	Leucine-rich repeat flightless-interacting protein 1					0	0	0	0	0	YES	83.9828	137.01	110.496	16.9518	88.7626	52.8572	167.637	131.996	149.817	82.5656	100.03	91.2979	101.117		0	49.098	3859800000	1899100000	1960700000	8.81674	8.70219	8.93759	8.82554	0.796896	0.631188	0.593493	0.528101	0.0427844	-0.107135	-0.189088	-0.242362	0.97078	1.07709	1.14004	1.18293
	KPNA6;KPNA5	Importin subunit alpha-7;Importin subunit alpha-6					0	0	0	0	0	YES	117.573	109.596	113.584	91.2867	113.851	102.569	108.849	152.243	130.546	34.0143	78.3318	56.173	100.718		0	128.84	3927500000	1845400000	2082100000	8.87417	8.78012	8.91322	8.59798	0.621929	0.409392	0.52898	0.563674	0.0890913	0.193961	0.167486	0.200379	0.940115	0.874202	0.890393	0.870322
	CUL4B	Cullin-4B					0	0	0	0	0	YES	70.0661	132.281	101.173	95.0091	92.5384	93.7737	119.351	109.565	114.458	96.2312	89.8775	93.0543	100.615		0	32.192	3235200000	1485400000	1749800000	8.73245	8.76156	8.90321	8.75233	0.948589	0.786185	0.854474	0.75797	0.0048968	0.063779	0.0391384	0.111031	0.996612	0.956755	0.973236	0.925926
	DNAJB1	DnaJ homolog subfamily B member 1					0	0	0	0	0	YES	102.807	133.905	118.356	113.291	99.0047	106.148	40.0285	79.0189	59.5237	70.6027	161.818	116.21	100.059		0	19.185	3913300000	1791600000	2121600000	8.88974	8.82174	8.61889	8.83705	0.761457	0.0399223	0.0571147	0.128888	0.0518593	0.483055	0.533663	0.512682	0.964692	0.715461	0.690799	0.700918		+
	PSMD4	26S proteasome non-ATPase regulatory subunit 4					0	0	0	0	0	YES	55.2913	124.175	89.7331	36.4403	54.5604	45.5003	132.753	170.834	151.794	121.337	103.855	112.596	99.9058		0	67.587	3584200000	1686300000	1897900000	8.71145	8.37736	8.99684	8.83631	0.382888	0.904817	0.976132	0.709241	0.163628	0.0680517	-0.0234604	0.132511	0.892777	0.953925	1.01639	0.912242
	PSMB3	Proteasome subunit beta type-3					0	0	0	0	0	YES	116.769	121.811	119.29	165.681	23.7204	94.7006	82.4005	77.5958	79.9982	117.952	88.7529	103.352	99.3352		0	133.03	3560600000	1672700000	1887900000	8.78087	9.04505	8.70354	8.77511	0.489765	0.633513	0.894672	0.95447	0.127897	0.1121	0.0244615	0.0277203	0.915164	0.92524	0.983188	0.980969
	CAPRIN1	Caprin-1					0	0	0	0	0	YES	160.117	171.676	165.896	1.86365	87.0104	44.437	125.679	87.3938	106.537	83.2081	74.9304	79.0692	98.9848		0	37.641	3740900000	1783900000	1957000000	8.98824	8.69372	8.88933	8.73868	0.471414	0.941651	0.526063	0.647442	-0.169907	0.0172092	0.16877	0.160533	1.12499	0.988142	0.889601	0.894694
	RPA1	Replication protein A 70 kDa DNA-binding subunit;Replication protein A 70 kDa DNA-binding subunit, N-terminally processed					0	0	0	0	0	YES	89.9287	95.8621	92.8954	54.5809	148.295	101.438	150.912	100.895	125.903	60.4405	90.3051	75.3728	98.9023		0	53.683	3255100000	1441200000	1813900000	8.70256	8.96884	8.91986	8.81895	0.702204	0.505223	0.310544	0.257267	-0.0938482	0.156655	0.278104	0.384713	1.06721	0.897102	0.824674	0.765931
	SRP72	Signal recognition particle subunit SRP72					0	0	0	0	0	YES	53.1676	41.6626	47.4151	151.482	121.381	136.431	115.396	131.85	123.623	70.7343	104.513	87.6235	98.7732		0	63.826	3783500000	1844900000	1938600000	8.60379	8.92811	8.97665	8.76142	0.281797	0.46952	0.746173	0.757505	0.20364	-0.161411	-0.120028	-0.114129	0.868357	1.11838	1.08676	1.08232
	APEH	Acylamino-acid-releasing enzyme					0	0	0	0	0	YES	140.6	129.599	135.1	35.9667	88.4767	62.2217	95.6977	128.862	112.28	64.0371	104.299	84.1679	98.4423		0	36.273	3787000000	1699500000	2087500000	8.87228	8.65223	8.83192	8.77992	0.371568	0.563924	0.559348	0.189862	0.167743	0.135666	0.154324	0.443819	0.890234	0.910249	0.898553	0.735186
	MAT2A	S-adenosylmethionine synthase isoform type-2					0	0	0	0	0	YES	147.947	182.1	165.024	75.0272	69.1054	72.0663	96.1758	85.3886	90.7822	72.5342	58.0636	65.2989	98.2927		0	39.883	3697100000	1699900000	1997200000	8.91259	8.78952	8.85715	8.75068	0.400323	0.138703	0.75066	0.662645	0.157432	0.348119	0.0777899	0.153546	0.89662	0.785608	0.947508	0.899038
	B2M	Beta-2-microglobulin;Beta-2-microglobulin form pI 5.3	0				0	0	0	0	1	NO	272.063	256.448	264.255	47.272	46.0001	46.6361	4.11257	154.175	79.1439	0	0	0	97.5088		0	31.709	2512500000	1395900000	1116600000	9.05335	8.42724	8.61386	NaN	0.121471	0.767215	0.41581	1	-0.356421	0.117562	-0.281106	NaN	1.28025	0.921744	1.21513	NaN
	ATP5H	ATP synthase subunit d, mitochondrial					0	0	0	0	0	YES	64.819	74.3199	69.5695	200.341	205.539	202.94	99.806	52.8544	76.3302	47.0624	32.6328	39.8476	97.1718		0	28.374	4646200000	2174000000	2472200000	8.5203	9.0786	8.66899	8.49056	0.931982	0.377438	0.619182	0.0776674	-0.0269839	0.207518	-0.177001	0.648649	1.01888	0.866026	1.13053	0.637877
	MAT2B	Methionine adenosyltransferase 2 subunit beta					0	0	0	0	0	YES	81.6108	174.659	128.135	86.321	108.829	97.575	154.097	20.7391	87.418	78.0271	72.1665	75.0968	97.0562		0	27.674	3659400000	1620500000	2039000000	8.86475	8.79593	8.89515	8.72861	0.125247	0.319841	0.451939	0.480639	0.29337	0.233888	0.202763	0.242816	0.815993	0.85034	0.868885	0.845094
	CBR3	Carbonyl reductase [NADPH] 3					0	0	0	0	0	YES	98.5331	98.2643	98.3987	0	239.213	119.606	77.9357	84.1627	81.0492	80.8182	95.6904	88.2543	96.8271		0	3.0237	2271500000	1004000000	1267600000	8.67639	8.87199	8.71088	8.73098	0.877636	1	0.455354	0.399201	0.0224743	NaN	0.201132	0.288536	0.984543	NaN	0.869868	0.818733
	EIF5B	Eukaryotic translation initiation factor 5B					0	0	0	0	0	YES	60.2334	62.2454	61.2394	152.134	216.881	184.508	78.4592	64.8354	71.6473	52.2889	82.0373	67.1631	96.1393		0	54.428	3816400000	1794100000	2022300000	8.48512	9.00702	8.75278	8.58211	0.750157	0.793055	0.673586	0.705115	0.054779	-0.0585481	0.107554	0.134352	0.962742	1.04142	0.92816	0.911079
	DDX19A;DDX19B	ATP-dependent RNA helicase DDX19A;ATP-dependent RNA helicase DDX19B					0	0	0	0	0	YES	91.6161	71.6518	81.634	116.031	66.4602	91.2456	98.8741	166.58	132.727	59.5456	98.2087	78.8772	96.121		0	82.335	3778700000	1809000000	1969700000	8.63476	8.74414	8.95655	8.75953	0.772288	0.981432	0.953266	0.941253	0.0490731	0.0054719	-0.0328904	0.0332292	0.966557	0.996214	1.02306	0.97723
	XPNPEP1	Xaa-Pro aminopeptidase 1					0	0	0	0	0	YES	90.1118	101.89	96.001	67.0014	91.1527	79.0771	82.0197	70.8324	76.426	140.636	124.279	132.458	95.9905		0	22.171	2801700000	1378100000	1423500000	8.68033	8.80779	8.74845	8.90521	0.81792	0.335708	0.683515	0.44606	0.0374524	-0.214843	-0.147634	-0.294544	0.974374	1.16058	1.10775	1.2265
	EIF1AX;EIF1AY	Eukaryotic translation initiation factor 1A, X-chromosomal;Eukaryotic translation initiation factor 1A, Y-chromosomal					0	0	0	0	0	YES	34.5539	30.9833	32.7686	107.834	45.5045	76.6693	114.618	142.387	128.503	159.826	131.629	145.727	95.9171		0	21.414	3332400000	1496200000	1836200000	8.21147	8.56757	8.98259	8.93316	0.677367	0.974575	0.636802	0.688462	0.0846086	0.0255958	0.122209	0.141825	0.94304	0.982415	0.91878	0.906372
	SOD1	Superoxide dismutase [Cu-Zn]					0	0	0	0	0	YES	9.73232	23.8122	16.7723	24.0612	24.0635	24.0623	300.107	185.179	242.643	86.1543	112.06	99.1071	95.6461		0	101.92	2631000000	1298000000	1333000000	7.97133	8.05964	9.18087	8.73278	0.00798592	0.144413	0.0138129	0.90093	0.632361	-0.373159	-0.625623	-0.0407788	0.64512	1.29519	1.54288	1.02867	+
	SFXN1	Sideroflexin-1					0	0	0	0	0	YES	157.682	147.812	152.747	79.3444	67.0078	73.1761	80.8739	62.7409	71.8074	90.6913	78.1021	84.3967	95.5317		0	51.256	3492400000	1645100000	1847400000	8.92571	8.63941	8.72218	8.72464	0.137836	0.424821	0.307399	0.891393	-0.341848	0.187641	0.280006	0.0540844	1.26738	0.87804	0.823588	0.963206
	PSMD7	26S proteasome non-ATPase regulatory subunit 7					0	0	0	0	0	YES	81.778	94.1473	87.9626	104.994	109.445	107.22	75.9051	111.408	93.6564	98.5584	85.8782	92.2183	95.2642		0	62.127	2457100000	1191200000	1265900000	8.61259	8.747	8.74691	8.73085	0.709974	0.805729	0.879694	0.7176	-0.0914945	-0.0548867	-0.063379	-0.13519	1.06547	1.03878	1.04491	1.09824
	TXNL1	Thioredoxin-like protein 1					0	0	0	0	0	YES	147.637	37.7126	92.6745	142.349	21.4784	81.9135	50.0205	118.138	84.0792	176.767	67.8758	122.322	95.2472		0	45.302	3558600000	1794400000	1764200000	8.83657	8.84861	8.74913	8.93438	0.426012	0.462526	0.704019	0.538361	-0.186984	-0.163963	-0.138505	-0.236147	1.13838	1.12036	1.10076	1.17784
	PSMD8	26S proteasome non-ATPase regulatory subunit 8					0	0	0	0	0	YES	111.563	124.878	118.22	58.1007	102.986	80.5432	87.8053	109.695	98.7501	92.5954	74.2129	83.4041	95.2294		0	19.397	3241700000	1572300000	1669400000	8.7953	8.80528	8.76885	8.6546	0.901686	0.872499	0.857156	0.897091	0.0164963	-0.0358158	0.0381553	-0.0427094	0.988631	1.02514	0.973899	1.03005
	ANXA8;ANXA8L1	Annexin A8;Annexin A8-like protein 1					0	0	0	0	0	YES	130.133	131.948	131.041	78.6844	122.092	100.388	43.1912	44.9293	44.0602	120.859	89.339	105.099	95.147		0	36.009	3451600000	1586000000	1865700000	8.86928	8.78163	8.60768	8.79429	0.629762	0.867321	0.035544	0.891724	0.0869197	0.0392789	0.591105	0.0539454	0.941531	0.973141	0.663834	0.963298
	ACTR1A	Alpha-centractin					0	0	0	0	0	YES	173.561	57.2257	115.393	149.486	79.7742	114.63	127.357	108.615	117.986	29.135	32.3627	30.7488	94.6896		0	47.155	3104400000	1471600000	1632800000	8.76272	8.84903	8.93151	8.25278	0.809462	0.844878	0.169832	0.465623	-0.0620531	0.0460021	0.381283	0.284159	1.04395	0.968617	0.767754	0.82122
	LMO7	LIM domain only protein 7					0	0	0	0	0	YES	90.7883	115.805	103.297	130.337	56.2789	93.3081	103.355	97.2332	100.294	74.5692	86.8602	80.7147	94.4034		0	78.938	3831800000	1898600000	1933200000	8.71678	8.76207	8.78407	8.70736	0.333719	0.954486	0.745089	0.655862	-0.225396	-0.0127374	-0.120498	0.156655	1.1691	1.00887	1.08711	0.897102
	ISG15	Ubiquitin-like protein ISG15					0	0	0	0	0	YES	55.585	36.5689	46.0769	232.822	129.233	181.027	21.8233	71.2067	46.515	94.9853	112.487	103.736	94.3389		0	3.3119	2816900000	2156000000	660880000	8.30423	8.76018	8.20445	8.54658	0.0455073	2.77662e-27	2.4952e-07	2.9193e-07	-0.565951	-2.41465	-1.80657	-2.03268	1.48036	5.33191	3.49809	4.09165	+	+
	FKBP3	Peptidyl-prolyl cis-trans isomerase FKBP3					0	0	0	0	0	YES	91.5923	104.089	97.8404	72.2619	75.5586	73.9102	138.847	126.167	132.507	103.064	40.4358	71.7499	94.0018		0	41.869	3829900000	1709300000	2120600000	8.75296	8.51232	9.00634	8.7118	0.443133	0.117362	0.467855	0.765648	0.142871	-0.402874	0.195221	0.107688	0.905715	1.32214	0.873439	0.928074
	CYR61	Protein CYR61					0	0	0	0	0	YES	83.2823	78.3667	80.8245	48.992	29.9573	39.4746	100.235	109.289	104.762	160.265	140.19	150.227	93.8222		0	44.64	3300300000	1573000000	1727400000	8.63844	8.57881	8.86197	8.83377	0.115957	0.000379393	0.738813	0.0263382	0.301002	0.835601	0.0822938	-0.875381	0.811688	0.56035	0.944555	1.83449		+
	IDI1	Isopentenyl-diphosphate Delta-isomerase 1					0	0	0	0	0	YES	169.51	175.203	172.357	128.273	110.721	119.497	40.2992	39.5622	39.9307	36.2499	50.1743	43.2121	93.749		0	47.221	3887100000	1324100000	2563000000	8.97909	8.96213	8.63328	8.77234	0.112006	0.000456017	1.99948e-07	1.35519e-07	0.304394	0.824157	1.48213	1.75801	0.809782	0.564812	0.357961	0.295657		+
	IDH3G;hCG_2004980	Isocitrate dehydrogenase [NAD] subunit gamma, mitochondrial					0	0	0	0	0	YES	183.391	153.447	168.419	36.9591	63.3971	50.1781	104.644	0	52.3218	207.397	0	103.699	93.6545		0	26.436	3682200000	1925200000	1757100000	8.88219	8.41883	8.71152	8.90985	0.25831	0.639929	0.154953	0.848935	-0.262261	-0.0961596	-0.481143	-0.0670468	1.19936	1.06892	1.39585	1.04757
	EIF3G	Eukaryotic translation initiation factor 3 subunit G					0	0	0	0	0	YES	85.925	118.313	102.119	35.0403	55.5824	45.3114	117.195	132.045	124.62	92.3289	112.432	102.38	93.6077		0	61.586	3571200000	1691700000	1879500000	8.84204	8.44648	8.92317	8.7833	0.731593	0.452762	0.689946	0.871626	-0.0849917	-0.175208	-0.14476	0.062398	1.06068	1.12913	1.10555	0.957671
	KIAA0368;ECM29	Proteasome-associated protein ECM29 homolog					0	0	0	0	0	YES	121.696	122.188	121.942	163.018	100.244	131.631	65.2665	58.4471	61.8568	57.5765	60.0949	58.8357	93.5663		0	58.393	2973600000	1515100000	1458500000	8.79329	8.92965	8.55052	8.60704	0.657452	0.0587516	0.406595	0.647519	-0.107601	-0.421805	-0.286427	-0.173222	1.07744	1.3396	1.21962	1.12757
	COPZ1	Coatomer subunit zeta-1					0	0	0	0	0	YES	127.737	137.078	132.407	59.6227	68.5848	64.1037	53.9691	94.7652	74.3672	64.2737	141.948	103.111	93.4973		0	50.82	2853800000	1427600000	1426300000	8.81765	8.51005	8.70332	8.70714	0.000939065	0.115565	0.767252	0.331071	-0.752559	-0.405031	-0.110916	-0.378119	1.68478	1.32412	1.07991	1.29965	+
	PTRF	Polymerase I and transcript release factor					0	0	0	0	0	YES	161.399	178.202	169.801	105.171	19.2877	62.2293	42.9854	76.9009	59.9431	76.4059	86.3217	81.3638	93.3342		0	43.124	3492700000	1860500000	1632200000	8.94675	8.64419	8.50385	8.81073	0.0872883	0.638775	0.371141	0.9938	-0.392724	-0.104759	0.276913	0.0113525	1.31287	1.07532	0.825355	0.992162
	FUBP3	Far upstream element-binding protein 3					0	0	0	0	0	YES	176.124	118.215	147.17	49.7802	85.874	67.8271	91.0789	86.6632	88.8711	47.7058	86.4167	67.0612	92.7322		0	60.703	2972000000	1325400000	1646600000	8.89957	8.6981	8.74712	8.67759	0.998252	0.936347	0.838138	0.889077	-0.00826141	0.0187766	-0.0807743	0.0550568	1.00574	0.987069	1.05759	0.962557
	FKBP1A;FKBP12-Exin	Peptidyl-prolyl cis-trans isomerase FKBP1A;Peptidyl-prolyl cis-trans isomerase					0	0	0	0	0	YES	55.1536	39.1426	47.1481	124.942	73.1604	99.0511	135.233	116.555	125.894	96.3017	101.052	98.6767	92.6924		0	29.13	3675200000	1825200000	1850000000	8.36814	8.73795	8.8604	8.72873	0.762074	0.438632	0.665174	0.701285	0.0568609	-0.172848	-0.155888	-0.143915	0.961354	1.12728	1.11411	1.1049
	CCDC124	Coiled-coil domain-containing protein 124					0	0	0	0	0	YES	71.9016	80.3308	76.1162	130.23	156.381	143.305	51.6703	98.4429	75.0566	55.3684	89.1172	72.2428	91.6803		0	36.705	3268000000	1673500000	1594500000	8.60239	8.92048	8.61168	8.69847	0.878953	0.640266	0.278523	0.662496	-0.0420557	-0.104294	-0.369837	-0.164965	1.02958	1.07497	1.29221	1.12114
	RAB6A;RAB6B	Ras-related protein Rab-6A;Ras-related protein Rab-6B					0	0	0	0	0	YES	88.6233	74.7604	81.6918	109.446	104.87	107.158	74.6669	102.794	88.7306	91.0752	83.6212	87.3482	91.2321		0	61.604	2927300000	1571600000	1355700000	8.57468	8.6845	8.6985	8.72304	0.153958	0.194246	0.201588	0.254163	-0.328743	-0.289704	-0.433409	-0.445126	1.25592	1.22239	1.35042	1.36143
	IQGAP2	Ras GTPase-activating-like protein IQGAP2					0	0	0	0	0	YES	114.986	113.018	114.002	0	169.747	84.8733	74.8371	90.3408	82.5889	80.207	85.7436	82.9753	91.1098		0.002038	0.29251	3337200000	1564100000	1773100000	8.753	8.64756	8.73668	8.70412	0.760917	1	0.317511	0.622861	0.0519985	NaN	0.273934	0.171975	0.964599	NaN	0.827061	0.887626
	AP1G1	AP-1 complex subunit gamma-1					0	0	0	0	0	YES	85.4553	115.125	100.29	106.606	158.339	132.472	75.2236	67.7272	71.4754	61.8352	57.0658	59.4505	90.9221		0	17.287	3513100000	1711100000	1802100000	8.72543	8.89018	8.69938	8.64792	0.899961	0.79155	0.691735	0.534804	0.0169242	-0.0589838	0.10044	0.214747	0.988338	1.04173	0.932749	0.861697
	PALLD	Palladin					0	0	0	0	0	YES	53.6818	140.62	97.1511	123.353	83.374	103.363	85.6904	110.085	97.8875	59.9217	67.6445	63.7831	90.5463		0	50.906	3054300000	1568100000	1486200000	8.74135	8.67326	8.74845	8.60216	0.182712	0.00398086	0.430401	0.795778	-0.307751	-0.642662	-0.27282	-0.0942486	1.23778	1.56121	1.20817	1.06751		+
	HIST2H3PS2	Histone H3					0	0	0	0	0	YES	93.7414	83.2089	88.4751	0	36.0828	18.0414	124.464	153.842	139.153	90.6756	141.425	116.05	90.43		0.00073233	1.1102	3030000000	1276500000	1753500000	8.68151	8.28176	8.97286	8.89177	0.0605507	0.585229	0.197303	0.112347	0.36087	0.187641	0.35727	0.535655	0.778695	0.87804	0.78064	0.689846
	EIF2A	Eukaryotic translation initiation factor 2A;Eukaryotic translation initiation factor 2A, N-terminally processed					0	0	0	0	0	YES	61.9527	110.381	86.1669	46.635	87.5749	67.105	121.328	112.52	116.924	106.527	75.7889	91.1581	90.3385		0	60.317	3635100000	1781300000	1853800000	8.6876	8.63557	8.85309	8.858	0.610694	0.109092	0.351659	0.766101	-0.122381	-0.357585	-0.319784	-0.109639	1.08853	1.28128	1.24814	1.07896
	PAFAH1B3	Platelet-activating factor acetylhydrolase IB subunit gamma					0	0	0	0	0	YES	79.7641	81.1164	80.4403	92.6299	121.828	107.229	94.1257	111.237	102.682	57.506	83.637	70.5715	90.2305		0	12.785	3694400000	1641400000	2053000000	8.73461	8.7958	8.83351	8.6962	0.289867	0.778076	0.849502	0.530134	0.200128	0.0662615	0.0409626	0.217107	0.870474	0.95511	0.972006	0.860289
	TCOF1	Treacle protein					0	0	0	0	0	YES	84.2057	82.1664	83.186	75.1423	168.881	122.012	58.361	73.9352	66.1481	94.758	82.0452	88.4016	89.9369		0	41.071	4269400000	1583900000	2685600000	8.70417	8.95924	9.01195	8.75554	0.00395501	0.088981	0.18732	0.60395	0.558268	0.399882	0.365692	0.180912	0.679117	0.75792	0.776096	0.882145	+
	DNAJC3	DnaJ homolog subfamily C member 3 = ERdj6					0	1	0	0	0	NO	0	0	0	17.8606	35.9977	26.9291	125.242	129.471	127.356	241.749	165.215	203.482	89.4419		0	34.557	3365500000	1832100000	1533400000	NaN	7.94922	9.16262	8.87682	1	0.00011496	1.41688e-18	6.39993e-12	NaN	-1.30847	-2.22182	-2.72604	NaN	2.47678	4.66483	6.61638		+
	RAP1GDS1	Rap1 GTPase-GDP dissociation stimulator 1					0	0	0	0	0	YES	24.1983	64.1974	44.1978	102.101	87.8462	94.9735	81.8333	92.4109	87.1221	103.605	159.101	131.353	89.4116		0	121.74	2766500000	1444900000	1321600000	8.45989	8.74036	8.62482	8.85366	0.602585	0.368298	0.0919016	0.0417907	0.0945064	-0.20078	-0.567661	-0.801506	0.936593	1.14932	1.48212	1.74292
	HN1L	Hematological and neurological expressed 1-like protein					0	0	0	0	0	YES	104.598	87.2126	95.9055	115.824	81.6437	98.7338	108.565	83.4158	95.9906	67.2443	66.3695	66.8069	89.3592		0	21.859	3424300000	1714500000	1709800000	8.70025	8.77913	8.76457	8.63827	0.984173	0.74519	0.767687	0.97698	-0.00387162	-0.0725283	-0.110729	0.0183493	1.00269	1.05156	1.07977	0.987362
	PNPT1	Polyribonucleotide nucleotidyltransferase 1, mitochondrial					0	0	0	0	0	YES	91.5525	154.89	123.221	41.3031	65.7299	53.5165	135.427	60.9451	98.1862	64.3458	100.561	82.4533	89.3443		0	33.098	3097000000	1434600000	1662400000	8.79424	8.47394	8.83739	8.77194	0.594045	0.340968	0.72047	0.985305	-0.127762	0.301705	-0.13125	0.00144204	1.0926	0.811293	1.09524	0.999001
	COPS5	COP9 signalosome complex subunit 5					0	0	0	0	0	YES	64.5094	96.0736	80.2915	95.0245	91.5706	93.2975	132.235	87.6698	109.952	68.0482	79.1673	73.6077	89.2873		0	24.767	2611600000	1205200000	1406400000	8.59201	8.72065	8.83593	8.65752	0.917248	0.874379	0.706659	0.559342	0.0126402	0.0371714	0.0946415	0.202512	0.991277	0.974564	0.936505	0.869036
	RSU1	Ras suppressor protein 1					0	0	0	0	0	YES	136.74	59.4368	98.0882	86.8199	57.6667	72.2433	65.8823	134.431	100.157	109.662	59.8542	84.7579	88.8116		0	37.881	2719000000	1339100000	1379900000	8.76474	8.58695	8.76231	8.76427	0.0548697	0.951314	0.964018	0.85625	-0.440009	0.0143553	-0.0284546	-0.0633338	1.35661	0.990099	1.01992	1.04488
	COX17	Cytochrome c oxidase copper chaperone					0	0	0	0	0	YES	115.639	99.7449	107.692	118.456	70.7315	94.5939	114.448	101.65	108.049	46.9449	41.5912	44.2681	88.6507		0	29.571	3476000000	1863800000	1612200000	8.70534	8.84356	8.72955	8.43024	0.276041	0.955525	0.311575	0.425257	-0.252999	-0.0124463	-0.346261	0.308011	1.19168	1.00866	1.27126	0.807754
	RNPS1	RNA-binding protein with serine-rich domain 1					0	0	0	0	0	YES	66.1841	60.6243	63.4042	125.195	120.471	122.833	75.4586	121.109	98.2839	38.1822	101.559	69.8704	88.5979		0	9.9824	3930600000	1591100000	2339500000	8.61691	8.88653	8.84492	8.77261	6.64958e-06	0.0169317	0.213482	0.916285	0.877037	0.561497	0.34426	-0.0330676	0.544484	0.677599	0.787712	1.02319	+	+
	ANP32E	Acidic leucine-rich nuclear phosphoprotein 32 family member E					0	0	0	0	0	YES	113.999	101.664	107.831	70.8251	85.9473	78.3862	115.542	76.637	96.0896	72.2623	70.7537	71.508	88.4538		0	58.299	2373900000	1014800000	1359100000	8.74974	8.67359	8.91499	8.71437	0.370169	0.389642	0.630246	0.399599	0.168257	0.202261	0.124857	0.288299	0.889917	0.869187	0.917095	0.818867
	UBAP2L	Ubiquitin-associated protein 2-like					0	0	0	0	0	YES	68.7121	58.3203	63.5162	65.6875	75.8665	70.777	115.137	123.723	119.43	97.3752	101.028	99.2016	88.2312		0	95.676	3121800000	1500800000	1621000000	8.4997	8.70228	8.86698	8.75103	0.255663	0.829118	0.705263	0.882475	-0.263681	0.0507454	0.0951818	0.0578315	1.20054	0.965437	0.936154	0.960707
	TGM2	Protein-glutamine gamma-glutamyltransferase 2					0	0	0	0	0	YES	161.025	123.903	142.464	20.3833	13.0354	16.7094	75.7584	44.5177	60.138	154.482	111.616	133.049	88.0902		0	39.264	2660200000	1152000000	1508300000	8.93204	8.19667	8.70588	8.87796	0.503405	8.81509e-06	6.74612e-06	0.890115	0.123666	1.28161	1.28137	-0.0462208	0.917852	0.411336	0.411404	1.03256		+
	SNX12	Sorting nexin-12					0	0	0	0	0	YES	112.733	99.6921	106.213	82.7751	55.9116	69.3434	92.9589	77.0397	84.9993	97.477	81.3641	89.4206	87.494		0	29.207	2432300000	1183000000	1249300000	8.7502	8.64496	8.71656	8.71569	0.31804	0.42046	0.961424	0.78705	-0.232566	0.189414	0.000288558	0.0984196	1.17492	0.876962	0.9998	0.934056
	ZNF14;STXBP2	Syntaxin-binding protein 2			0		0	1	1	0	0	NO	0	0	0	0	0	0	689.088	0	344.544	9.96632	0	4.98316	87.3818		0.0017013	0.31	2426900000	876600000	1550300000	NaN	NaN	9.37745	7.31584	1	1	1	0.0687385	NaN	NaN	NaN	-0.989134	NaN	NaN	NaN	1.98499
	UCHL3	Ubiquitin carboxyl-terminal hydrolase isozyme L3					0	0	0	0	0	YES	52.339	57.5437	54.9414	59.5121	36.2595	47.8858	104.943	81.8733	93.4084	129.549	176.286	152.918	87.2883		0	36.401	2692800000	1323800000	1369000000	8.4374	8.42711	8.7657	8.94098	0.456578	0.317311	0.644984	0.228857	0.165044	-0.244805	-0.165078	-0.470209	0.891902	1.18493	1.12123	1.38531
	PSMD6	26S proteasome non-ATPase regulatory subunit 6					0	0	0	0	0	YES	82.16	133.444	107.802	27.4942	47.7135	37.6039	128.386	92.6464	110.516	126.368	59.8827	93.1251	87.2617		0	44.526	3259000000	1567600000	1691500000	8.76301	8.62963	8.91353	8.79899	0.682474	0.277962	0.584406	0.719534	0.072586	0.255078	-0.19342	-0.13416	0.950932	0.837942	1.14347	1.09745
	SQRDL	Sulfide:quinone oxidoreductase, mitochondrial					0	0	0	0	0	YES	27.8454	39.2385	33.542	0	22.3457	11.1729	100.179	363.117	231.648	75.2806	68.971	72.1258	87.1221		0	26.204	1552200000	948790000	603400000	8.19151	8.04289	8.95189	8.59247	0.0145187	0.389455	0.0295505	0.0664963	-0.687823	-0.271879	-0.728933	-0.721682	1.61085	1.20738	1.65741	1.6491	+
	GNPDA1	Glucosamine-6-phosphate isomerase 1					0	0	0	0	0	YES	79.0812	91.6696	85.3754	160.431	182.672	171.552	27.2564	19.1243	23.1904	100.588	33.2837	66.9358	86.7633		0	28.375	2898400000	1305000000	1593400000	8.63733	8.98209	8.25741	8.70647	0.217888	0.207748	0.0523718	0.402797	0.234256	0.296193	0.610039	0.286408	0.850123	0.814399	0.655179	0.819941
	EHD1	EH domain-containing protein 1					0	0	0	0	0	YES	70.8365	107.647	89.2416	25.3721	220.832	123.102	82.1088	25.0036	53.5562	99.8905	57.9907	78.9406	86.2102		0	30.469	4268000000	2019300000	2248700000	8.68343	8.88158	8.73157	8.81488	0.454157	0.363293	0.089016	0.954863	-0.176283	-0.202887	0.475604	-0.0137566	1.12997	1.151	0.719166	1.00958
	COLGALT1	Procollagen galactosyltransferase 1					0	0	0	0	0	YES	89.5546	99.6014	94.578	95.9225	95.9695	95.946	112.107	43.2277	77.6671	95.3379	57.0483	76.1931	86.096		0	49.512	2951200000	1446700000	1504500000	8.69107	8.76118	8.69214	8.63264	0.463015	0.558282	0.572177	0.989922	-0.172994	0.137635	0.148869	0.00374607	1.1274	0.909008	0.901957	0.997407
	FBL	rRNA 2-O-methyltransferase fibrillarin					0	0	0	0	0	YES	88.7825	120.919	104.851	148.136	139.453	143.794	56.8376	55.8249	56.3313	42.0045	32.1156	37.06	85.5091		0	26.521	3040400000	1446200000	1594100000	8.71036	8.93192	8.63247	8.38553	0.656304	0.818984	0.468392	0.101739	-0.107959	0.0538064	0.19497	0.603597	1.0777	0.963391	0.873591	0.658111
	RAI14	Ankycorbin					0	0	0	0	0	YES	67.5086	42.4634	54.986	14.1834	34.453	24.3182	88.6723	28.609	58.6407	30.6159	376.933	203.774	85.4298		0	22.11	2187700000	1063400000	1124200000	8.45936	8.11341	8.59142	9.02719	0.894718	0.448313	0.351368	0.869822	-0.037562	-0.177278	0.254473	-0.0564612	1.02638	1.13075	0.838293	1.03991
	PRKAR2A	cAMP-dependent protein kinase type II-alpha regulatory subunit					0	0	0	0	0	YES	124.514	137.992	131.253	49.6889	44.0199	46.8544	104.4	39.7701	72.0853	60.6881	121.151	90.9197	85.278		0	99.106	2549300000	1220300000	1328900000	8.88836	8.36857	8.62511	8.75485	0.778622	0.963231	0.972431	0.985894	-0.0710574	0.0216219	-0.00368358	0.014641	1.05049	0.985125	1.00256	0.989903
	MBNL1	Muscleblind-like protein 1					0	0	0	0	0	YES	80.4726	49.5106	64.9916	86.9964	85.4634	86.2299	101.807	82.4335	92.1205	72.7771	122.284	97.5304	85.2181		0	11.391	2669200000	1193900000	1475300000	8.53762	8.72114	8.78168	8.76332	0.608352	0.341174	0.97243	0.962976	0.0928839	0.223793	-0.0249862	0.0241777	0.937647	0.856311	1.01747	0.983381
	COPS2	COP9 signalosome complex subunit 2					0	0	0	0	0	YES	125.198	126.305	125.752	98.7008	69.425	84.0629	69.7815	82.6608	76.2212	57.7418	51.3606	54.5512	85.1468		0	39.019	3113500000	1500500000	1613000000	8.88069	8.80925	8.75173	8.50473	0.805989	0.401372	0.370212	0.419903	-0.0630625	-0.18728	0.244156	0.276437	1.04468	1.13861	0.844309	0.825627
	NUP155	Nuclear pore complex protein Nup155					0	0	0	0	0	YES	79.3256	100.206	89.7657	67.1327	63.9689	65.5508	113.727	94.8302	104.279	86.6402	74.2652	80.4527	85.0119		0	86.287	2897100000	1353800000	1543300000	8.7323	8.59408	8.80319	8.70899	0.839368	0.142474	0.867535	0.966096	-0.0534039	0.344828	0.0343565	-0.00814535	1.03771	0.787402	0.976467	1.00566
	EIF3S3;EIF3H	Eukaryotic translation initiation factor 3 subunit H					0	0	0	0	0	YES	159.544	61.0541	110.299	24.8371	28.3781	26.6076	119.245	88.1163	103.681	63.0192	131.755	97.3873	84.4937		0	30.691	3132500000	1521300000	1611200000	8.93963	8.17056	8.79154	8.78525	7.52504e-07	0.0832214	0.779964	0.827314	0.963992	-0.449336	-0.105458	-0.078061	0.512636	1.36541	1.07584	1.0556	+
	FAM114A1	Protein NOXP20					0	0	0	0	0	YES	57.2135	56.3486	56.7811	149.602	133.243	141.422	108.768	24.1967	66.4824	114.567	28.856	71.7114	84.0993		0	46.127	2300400000	1141800000	1158600000	8.46553	8.88351	8.62478	8.61334	0.892949	0.703173	0.674387	0.592654	-0.0380656	-0.0850376	-0.151731	-0.204183	1.02674	1.06072	1.1109	1.15203
	EPHX1	Epoxide hydrolase 1					0	0	0	0	0	YES	57.1339	51.7655	54.4497	131.673	79.1363	105.405	71.1356	48.6507	59.8931	105.07	128.089	116.579	84.0817		0	27.936	2384300000	1325200000	1059200000	8.47185	8.87743	8.57689	8.79361	0.00254144	0.94747	0.191533	0.0115606	-0.687312	-0.0147036	-0.442948	-0.996426	1.61028	1.01024	1.35938	1.99505	+
	SUCLA2	Succinyl-CoA ligase [ADP-forming] subunit beta, mitochondrial					0	0	0	0	0	YES	132.131	116.591	124.361	0	63.4374	31.7187	116.328	94.9276	105.628	89.3043	51.6988	70.5015	83.0523		0	64.557	2847900000	1400200000	1447700000	8.75032	8.44813	8.80961	8.65396	0.527496	0.747439	0.940318	0.789238	-0.150017	0.124857	0.00791302	0.097476	1.10958	0.917095	0.99453	0.934667
	RRM1	Ribonucleoside-diphosphate reductase large subunit					0	0	0	0	0	YES	85.8135	107.088	96.4505	98.0408	68.1244	83.0826	77.1205	79.8024	78.4614	70.4585	76.1516	73.305	82.8249		0	84.598	3658700000	1552200000	2106500000	8.86217	8.81015	8.83094	8.79459	0.362891	0.256551	0.0138738	0.113096	0.170951	0.266757	0.694212	0.53456	0.888257	0.831186	0.618047	0.690369
	CD44	CD44 antigen					0	0	0	0	0	YES	49.7688	44.2544	47.0116	88.6158	103.037	95.8265	102.991	87.889	95.4398	81.0768	97.1079	89.0923	81.8426		0	16.694	2796000000	1455100000	1340800000	8.43818	8.67136	8.69751	8.63652	0.673839	0.339259	0.391049	0.191598	-0.132752	-0.21327	-0.295571	-0.511033	1.09638	1.15931	1.22737	1.42507
	CCT6B	T-complex protein 1 subunit zeta-2					0	1	0	1	0	NO	0	0	0	425.335	0	212.667	0	0	0	226.571	0	113.286	81.4882		0	2.0224	3857100000	1872900000	1984200000	NaN	9.0393	NaN	8.8431	1	1	1	1	NaN	NaN	NaN	NaN	NaN	NaN	NaN	NaN
	CUL2	Cullin-2					0	0	0	0	0	YES	105.028	106.362	105.695	26.9885	18.6763	22.8324	94.3283	91.8589	93.0936	103.722	104.711	104.216	81.4594		0	13.65	2922700000	1405000000	1517700000	8.72724	8.30882	8.78258	8.78733	0.903986	0.893314	0.914568	0.883072	0.0159258	-0.00296053	-0.0488897	-0.0497705	0.989022	1.00205	1.03447	1.0351
	CAPN1	Calpain-1 catalytic subunit					0	0	0	0	0	YES	28.8149	67.4298	48.1224	92.4227	109.064	100.743	114.051	79.9923	97.0218	81.163	77.4931	79.328	81.3038		0	22.887	2810200000	1314600000	1495600000	8.32305	8.81957	8.78528	8.63399	0.38078	0.788593	0.64075	0.237688	-0.257735	-0.0598407	-0.167021	-0.461243	1.1956	1.04235	1.12274	1.37673
	DCTN2	Dynactin subunit 2					0	0	0	0	0	YES	94.0518	89.3806	91.7162	123.299	120.581	121.94	48.5668	48.3982	48.4825	44.3458	75.9797	60.1627	80.5755		0	40.543	2885500000	1442900000	1442600000	8.66705	8.83589	8.50247	8.57475	0.713483	0.76153	0.996804	0.987614	-0.0904343	0.0713507	-0.00670966	0.00259443	1.06469	0.951747	1.00466	0.998203
	LRRC59	Leucine-rich repeat-containing protein 59					0	0	0	0	0	YES	3.63026	6.42948	5.02987	107.266	58.2511	82.7586	79.8861	106.935	93.4104	74.0794	206.174	140.127	80.3314		0	14.517	2051500000	1291700000	759760000	7.49252	8.63907	8.60649	8.79731	0.0601887	0.000914082	0.000669919	8.50915e-05	-0.733052	-0.739974	-1.13179	-1.55542	1.66215	1.67015	2.1913	2.93919		+
	ADI1	1,2-dihydroxy-3-keto-5-methylthiopentene dioxygenase					0	0	0	0	0	YES	45.6019	50.4337	48.0178	158.405	110.523	134.464	61.7457	77.6007	69.6732	87.8312	48.0891	67.9601	80.0287		0	18.504	2860400000	1465800000	1394600000	8.37952	8.83974	8.60552	8.53528	0.66886	0.74087	0.902093	0.6132	0.0874628	-0.0738032	0.021764	-0.192447	0.941176	1.05249	0.985028	1.1427
	DPY30	Protein dpy-30 homolog					0	0	0	0	0	YES	83.545	71.4018	77.4734	70.3531	58.1807	64.2669	76.986	73.5756	75.2808	63.8678	139.144	101.506	79.6318		0	66.371	2865000000	1543200000	1321700000	8.52704	8.55295	8.6425	8.6784	0.853232	0.92197	0.729651	0.913015	0.0285691	0.0619835	-0.127226	0.0450235	0.980392	0.957946	1.09219	0.969274
	ZNF326	DBIRD complex subunit ZNF326					0	0	0	0	0	YES	23.8624	75.1403	49.5014	47.5928	74.3782	60.9855	114.999	117.488	116.244	112.31	70.8566	91.5834	79.5785		0	40.699	2433300000	1211000000	1222300000	8.49627	8.53485	8.81351	8.77197	0.855592	0.0811813	0.571927	0.906673	-0.0487405	-0.45257	-0.199421	0.0476779	1.03436	1.36848	1.14824	0.967492
	UFM1	Ubiquitin-fold modifier 1					0	0	0	0	0	YES	33.6616	124.764	79.2129	21.2491	121.432	71.3405	65.7219	94.0508	79.8864	97.7905	76.9292	87.3599	79.4499		0	5.2787	2595900000	1446000000	1149900000	8.797	8.73931	8.60257	8.68788	0.236492	0.0372122	0.247171	0.194509	-0.274285	-0.464962	-0.394032	-0.507644	1.20939	1.38028	1.31406	1.42173		+
	PCYOX1	Prenylcysteine oxidase 1					0	0	0	0	0	YES	91.7276	79.7416	85.7346	23.4012	38.019	30.7101	43.0648	61.4882	52.2765	121.368	175.97	148.669	79.3475		0	62.932	2261400000	1071700000	1189700000	8.6961	8.28999	8.52893	8.94872	0.467293	0.349724	0.456736	0.743366	0.135009	0.296898	0.229096	-0.121549	0.910664	0.814001	0.85317	1.0879
	BPNT1	3(2),5-bisphosphate nucleotidase 1					0	0	0	0	0	YES	154.219	114.664	134.442	34.3772	49.1864	41.7818	73.3988	64.2314	68.8151	79.9798	64.4269	72.2033	79.3105		0	40.279	2485500000	1043800000	1441700000	8.9037	8.42213	8.70706	8.69756	0.143395	0.292699	0.166155	0.811607	0.27965	0.329755	0.384713	0.0878702	0.823791	0.795671	0.765931	0.940911
	HSDL2	Hydroxysteroid dehydrogenase-like protein 2					0	0	0	0	0	YES	157.164	42.0071	99.5857	37.7865	53.7825	45.7845	124.853	44.8814	84.867	131.563	38.4908	85.0267	78.816		0	79.724	2970000000	1448800000	1521200000	8.63776	8.4381	8.67356	8.83598	0.120291	0.974052	0.509243	0.527512	-0.35753	0.0436244	-0.230584	-0.242721	1.28123	0.970214	1.17331	1.18322
	ACO1	Cytoplasmic aconitate hydratase					0	0	0	0	0	YES	113.45	134.774	124.112	42.1735	39.8578	41.0156	71.813	77.0519	74.4324	79.1648	71.7658	75.4653	78.7562		0	44.931	2708100000	1271000000	1437100000	8.7826	8.50183	8.73644	8.71727	0.287902	0.672728	0.174925	0.408439	-0.247029	0.153027	0.376624	0.283092	1.18676	0.899361	0.770238	0.821828
	RRBP1	Ribosome-binding protein 1					0	0	0	0	0	YES	19.6493	33.8441	26.7467	42.8949	37.8761	40.3855	109.068	58.4	83.7339	197.54	130.385	163.963	78.7072		0	54.168	2355600000	1322600000	1033000000	8.4933	8.52506	8.63928	8.78269	0.00473183	0.238435	0.0195743	3.51595e-05	-0.643721	-0.294774	-0.780983	-1.63805	1.56235	1.22669	1.7183	3.11245	+
	ATP6V1B2	V-type proton ATPase subunit B, brain isoform					0	0	0	0	0	YES	50.9771	57.4659	54.2215	62.2997	32.4823	47.391	95.641	95.9668	95.8039	125.114	106.849	115.981	78.3494		0	37.152	2679900000	1360300000	1319500000	8.45944	8.4712	8.7339	8.78588	0.720717	0.255011	0.787248	0.363343	-0.0882547	-0.283422	-0.102341	-0.353063	1.06308	1.21708	1.07351	1.27727
	SF1	Splicing factor 1					0	0	0	0	0	YES	47.322	66.932	57.127	17.8068	77.824	47.8154	115.226	126.881	121.054	59.1288	115.172	87.1504	78.2867		0	30.377	2621300000	1392700000	1228700000	8.53599	8.54663	8.90471	8.66736	0.190663	0.458605	0.195843	0.607999	-0.302386	-0.172506	-0.438816	-0.195401	1.23318	1.12701	1.35549	1.14504
	PSMD9	26S proteasome non-ATPase regulatory subunit 9					0	0	0	0	0	YES	75.1236	93.2484	84.186	132.624	148.17	140.397	31.7075	42.303	37.0052	41.2726	60.3658	50.8192	78.1019		0	19.959	2726200000	1392400000	1333800000	8.65105	8.86827	8.40374	8.51012	0.955005	0.430611	0.919525	0.699538	0.00331442	-0.175892	-0.0432148	0.136848	0.997705	1.12966	1.03041	0.909504
	ATXN2L	Ataxin-2-like protein					0	0	0	0	0	YES	57.9816	73.2284	65.605	73.8675	42.3087	58.0881	118.54	86.306	102.423	99.2714	73.1683	86.2199	78.084		0	41.538	2296100000	1114800000	1181300000	8.57578	8.51184	8.81145	8.64482	0.984643	0.322666	0.550488	0.318207	-0.00398733	-0.241731	-0.209878	-0.388544	1.00277	1.18241	1.15659	1.30907
	SCFD1	Sec1 family domain-containing protein 1					0	0	0	0	0	YES	93.1524	91.6469	92.3996	79.306	78.044	78.675	72.2295	43.2066	57.718	112.655	51.226	81.9405	77.6833		0	94.028	2121800000	1132700000	989100000	8.62217	8.70379	8.484	8.6065	0.37872	0.229289	0.358939	0.416871	-0.205946	-0.268295	-0.327873	-0.314392	1.15344	1.20438	1.25516	1.24349
	NAPA	Alpha-soluble NSF attachment protein					0	0	0	0	0	YES	64.8254	32.0681	48.4467	65.811	88.8286	77.3198	44.1992	136.323	90.2611	99.6554	89.3311	94.4932	77.6302		0	49.722	2321600000	1170800000	1150800000	8.46642	8.56611	8.74972	8.79198	0.450671	0.382218	0.835418	0.950576	-0.177588	-0.209562	0.0461418	-0.0158992	1.13099	1.15634	0.968523	1.01108
	RPS15A	40S ribosomal protein S15a					0	0	0	0	0	YES	116.251	116.787	116.519	69.5357	105.75	87.6427	52.5316	63.1939	57.8628	49.9828	45.2151	47.599	77.4059		0	6.9667	2859000000	1154900000	1704100000	8.7986	8.71731	8.62409	8.54768	0.0807496	0.0314566	0.0542419	0.0113149	0.335255	0.505789	0.540126	0.849279	0.792644	0.704275	0.687711	0.555062		+
	MYL12A;MYL12B;MYL9	Myosin regulatory light chain 12A;Myosin regulatory light chain 12B;Myosin regulatory light polypeptide 9					0	0	0	0	0	YES	31.9359	29.023	30.4795	59.2197	186.323	122.771	106.807	70.6165	88.7118	64.012	70.9327	67.4723	77.3587		0	51.345	3221200000	1504900000	1716300000	8.19011	8.83013	8.82721	8.60619	0.844694	0.666323	0.53957	0.965254	0.0306892	0.101381	0.162855	-0.00856613	0.978953	0.93214	0.893256	1.00596
	PRRC1	Protein PRRC1					0	0	0	0	0	YES	83.0595	73.56	78.3097	33.6243	44.165	38.8947	61.2846	92.1593	76.7219	110.657	119.496	115.076	77.2507		0	63.076	2082300000	1008300000	1074000000	8.55528	8.3407	8.69467	8.83271	0.642618	0.526499	0.640257	0.460899	-0.112241	-0.142401	-0.167248	-0.284739	1.08091	1.10374	1.12291	1.21819
	THRAP3	Thyroid hormone receptor-associated protein 3					0	0	0	0	0	YES	87.9069	104.95	96.4283	85.423	84.6423	85.0327	87.0598	48.7489	67.9044	62.1792	56.1075	59.1434	77.1272		0	95.019	3132500000	1486300000	1646200000	8.70244	8.69682	8.65985	8.65766	0.540344	0.802057	0.851795	0.370003	0.1125	0.0589399	0.040121	0.306262	0.924984	0.959969	0.972573	0.808734
	ILK	Integrin-linked protein kinase					0	0	0	0	0	YES	74.2807	75.8965	75.0886	198.614	95.185	146.9	39.4362	8.9602	24.1982	103.738	20.5596	62.1487	77.0838		0	10.126	2557400000	1270500000	1286900000	8.71016	8.99591	8.30908	8.64116	0.55442	0.532556	0.932337	0.910602	-0.140857	-0.139283	0.0190613	-0.0359194	1.10256	1.10136	0.986875	1.02521
	SDF2L1	Stromal cell-derived factor 2-like protein 1					0	0	0	0	0	YES	0	13.8679	6.93395	73.5482	88.6673	81.1078	100.519	121.637	111.078	148.041	69.1057	108.573	76.9233		0	12.312	1915900000	1191700000	724150000	7.847	8.53187	8.62493	8.55042	0.105679	0.0010903	4.29572e-08	3.34845e-08	0.457437	-0.877738	-1.81441	-2.18935	0.728279	1.83749	3.51716	4.561		+
	CHCHD3	MICOS complex subunit MIC19					0	0	0	0	0	YES	102.967	115.903	109.435	79.2293	66.4506	72.84	72.1768	74.9143	73.5456	56.0023	46.8489	51.4256	76.8115		0	71.726	2690000000	1338500000	1351500000	8.73463	8.71518	8.63882	8.45323	0.92383	0.204345	0.600844	0.828167	-0.0292936	0.298424	-0.185606	-0.0719974	1.02051	0.81314	1.13729	1.05117
	DECR1	2,4-dienoyl-CoA reductase, mitochondrial					0	0	0	0	0	YES	130.117	86.7971	108.457	77.5101	113.184	95.347	68.1828	40.0607	54.1218	71.9019	26.6203	49.2611	76.7968		0	55.345	2256900000	1225000000	1032000000	8.66282	8.81923	8.50738	8.45353	0.173215	0.735477	0.856155	0.717259	-0.314392	-0.0753984	-0.0711939	-0.138267	1.24349	1.05365	1.05059	1.10058
	ENAH	Protein enabled homolog					0	0	0	0	0	YES	27.266	28.844	28.055	53.237	19.6389	36.438	154.17	95.4715	124.821	162.193	72.8009	117.497	76.7026		0	76.415	2104300000	1196900000	907400000	8.1065	8.30001	8.74804	8.78201	0.443697	0.00543366	0.0155664	0.00723318	-0.227422	-0.742	-0.808766	-1.06037	1.17074	1.67249	1.75171	2.08546		+
	LANCL1	LanC-like protein 1					0	0	0	0	0	YES	89.7297	75.972	82.8509	166.372	105.823	136.097	38.395	59.2573	48.8261	16.5985	61.4191	39.0088	76.6958		0	42.037	3589400000	1565300000	2024100000	8.72332	8.87485	8.68947	8.59772	0.107651	0.232293	0.107801	0.0721472	0.308244	0.280838	0.449007	0.605494	0.807624	0.823113	0.732547	0.657246
	PFAS	Phosphoribosylformylglycinamidine synthase					0	0	0	0	0	YES	32.9213	69.8486	51.385	106.077	137.678	121.877	66.2518	88.368	77.3099	57.7222	54.2512	55.9867	76.6398		0	48.472	2765600000	1270700000	1494800000	8.50092	8.84149	8.6824	8.63403	0.0311537	0.542832	0.77971	0.681231	0.415542	-0.135808	-0.105566	0.145091	0.749738	1.09871	1.07592	0.904323	+
	SNRPG;SNRPGP15	Small nuclear ribonucleoprotein G;Putative small nuclear ribonucleoprotein G-like protein 15					0	0	1	0	0	NO	10.0531	7.46773	8.76041	0	0	0	240.97	135.324	188.147	70.5204	148.117	109.319	76.5566		0	6.3387	2050700000	779560000	1271200000	7.87743	NaN	9.08322	8.88314	0.942479	1	0.50879	0.319978	-0.0360968	NaN	0.176451	0.338795	1.02534	NaN	0.884877	0.790701
	USP9X	Probable ubiquitin carboxyl-terminal hydrolase FAF-X					0	0	0	0	0	YES	76.753	219.894	148.323	37.3766	60.7922	49.0844	60.1397	26.3399	43.2398	75.4656	54.5434	65.0045	76.413		0	18.596	3853600000	1503000000	2350500000	8.91759	8.63002	8.61372	9.08664	0.955053	0.663243	0.513678	0.692089	-0.0204575	-0.0971778	-0.228317	-0.148865	1.01428	1.06968	1.17147	1.1087
	PSMC1	26S protease regulatory subunit 4					0	0	0	0	0	YES	68.7527	101.263	85.008	63.2284	32.0248	47.6266	120.672	37.5465	79.109	118.046	69.5317	93.7888	76.3831		0	48.492	3019600000	1284600000	1735100000	8.68044	8.53706	8.69936	8.80464	0.740295	0.29403	0.68657	0.764416	-0.0823925	-0.25858	0.102457	0.108223	1.05877	1.1963	0.931446	0.92773
	UQCRB	Cytochrome b-c1 complex subunit 7					0	0	0	0	0	YES	82.1441	55.4089	68.7765	112.232	80.9106	96.5712	100.13	104.848	102.489	0	74.3515	37.1757	76.2532		0	9.7308	1884300000	1016700000	867680000	8.48501	8.69818	8.68102	8.25753	0.168258	0.814853	0.0796643	1	-0.317966	0.0550568	-0.589746	NaN	1.24657	0.962557	1.50498	NaN
	DYNC1LI1	Cytoplasmic dynein 1 light intermediate chain 1					0	0	0	0	0	YES	86.0603	82.5744	84.3173	41.3622	162.063	101.713	55.5849	31.0891	43.337	86.5383	63.4266	74.9825	76.0874		0	67.567	2806900000	1380300000	1426600000	8.69885	8.85603	8.36205	8.7813	0.368079	0.361489	0.271945	0.406704	0.169027	-0.203651	-0.391058	-0.321495	0.889442	1.15161	1.31136	1.24963
	HNRNPUL2;HNRNPUL2-BSCL2	Heterogeneous nuclear ribonucleoprotein U-like protein 2					0	0	0	0	0	YES	112.391	111.628	112.009	51.5317	72.0746	61.8031	92.0432	72.6996	82.3714	52.6909	42.9256	47.8083	75.998		0	61.073	2723100000	1199200000	1523800000	8.7706	8.66907	8.76797	8.56493	0.292206	0.092627	0.276246	0.208652	0.199123	0.395392	0.299596	0.425996	0.87108	0.760283	0.81248	0.744325
	RAP1A	Ras-related protein Rap-1A					0	0	0	0	0	YES	97.5143	29.1681	63.3412	70.0377	75.9911	73.0144	88.7128	63.2515	75.9822	80.0503	103.079	91.5647	75.9756		0	13.341	2174500000	1038600000	1135900000	8.72203	8.75986	8.68392	8.6887	0.558044	0.497989	0.32094	0.0445132	0.107286	-0.151234	0.271904	-0.791008	0.928333	1.11052	0.828226	1.73028
	GPD2	Glycerol-3-phosphate dehydrogenase, mitochondrial					0	0	0	0	0	YES	56.8912	53.2212	55.0562	17.6925	43.5756	30.634	86.6709	182.752	134.711	112.702	52.6079	82.6549	75.7641		0	13.936	2178500000	1054300000	1124200000	8.43554	8.40057	8.93333	8.77463	0.492225	0.624536	0.611914	0.601503	-0.205696	-0.102202	-0.180397	-0.199106	1.15324	1.07341	1.1332	1.14799
	PYGL	Glycogen phosphorylase, liver form;Phosphorylase					0	0	0	0	0	YES	124.959	72.76	98.8597	98.9541	128.375	113.664	32.9934	16.4575	24.7255	105.336	25.4205	65.3784	75.657		0	85.065	2952900000	1235700000	1717200000	8.67122	9.01849	8.28344	8.51968	0.754991	0.107832	0.127368	0.565209	0.0535284	0.378068	0.477677	0.199625	0.963577	0.769468	0.718133	0.870777
	SQSTM1	Sequestosome-1					0	0	0	0	0	YES	102.664	111.393	107.029	28.472	50.2707	39.3714	54.8872	51.4385	53.1629	93.3398	111.086	102.213	75.444		0	123.96	2362300000	1226400000	1135800000	8.68865	8.5052	8.5927	8.7346	0.004087	0.168576	0.00965843	0.844888	-0.654218	0.420833	0.730836	-0.0691037	1.57376	0.746993	0.602555	1.04906	+
	TPP2	Tripeptidyl-peptidase 2					0	0	0	0	0	YES	36.4833	39.3843	37.9338	135.433	141.132	138.283	55.674	71.891	63.7825	59.2831	63.0196	61.1514	75.2876		0	21.372	3203200000	1594300000	1608800000	8.50652	8.84666	8.63473	8.58196	0.272784	0.400917	0.409201	0.424293	0.207643	-0.187461	-0.284915	-0.30927	0.865951	1.13876	1.21834	1.23908
	ARPC4-TTLL3;ARPC4	Actin-related protein 2/3 complex subunit 4					0	0	1	0	0	NO	70.558	78.3365	74.4472	0	0	0	100.195	83.2535	91.7242	184	84.8091	134.404	75.1439		0	22.571	2151900000	928500000	1223400000	8.55512	NaN	8.84994	8.93053	0.580236	1	0.280222	0.872166	-0.132277	NaN	0.297015	-0.0552765	1.09602	NaN	0.813935	1.03906
	TIMM13	Mitochondrial import inner membrane translocase subunit Tim13					0	0	0	0	0	YES	92.4439	91.6091	92.0265	55.1228	105.222	80.1723	56.1075	50.548	53.3278	80.0581	68.9623	74.5102	75.0092		0	18.939	2900200000	1412100000	1488000000	8.65821	8.7815	8.6177	8.66768	0.861886	0.0429965	0.467049	0.672329	-0.046936	0.475811	0.1956	0.149129	1.03307	0.719062	0.87321	0.901795		+
	GNAI3	Guanine nucleotide-binding protein G(k) subunit alpha					0	0	0	0	0	YES	73.4728	86.6083	80.0405	106.184	107.443	106.814	67.5111	66.8276	67.1693	36.5233	52.741	44.6321	74.6639		0	11.887	2703900000	1349700000	1354200000	8.60868	8.73471	8.61742	8.41103	0.7647	0.655377	0.911722	0.943808	0.051024	-0.0996027	-0.0500692	-0.00504377	0.965251	1.07148	1.03531	1.0035
	AGFG2	Arf-GAP domain and FG repeat-containing protein 2					0	0	0	0	0	YES	138.268	155.593	146.93	70.9863	0	35.4932	96.0705	82.6283	89.3494	53.6735	0	26.8367	74.6524		0	10.468	1814700000	895630000	919090000	8.80714	8.36972	8.71669	8.36211	0.0507233	1	0.261361	0.340522	-0.447643	NaN	-0.382833	0.362891	1.36381	NaN	1.3039	0.777605
	VTA1	Vacuolar protein sorting-associated protein VTA1 homolog					0	0	0	0	0	YES	135.164	36.2569	85.7103	15.0484	17.1074	16.0779	94.3202	36.5861	65.4531	101.818	159.252	130.535	74.444		0	22.676	1806400000	876490000	929920000	8.63117	7.9317	8.64911	8.84562	0.65961	0.763591	0.876402	0.933826	0.0787465	-0.0781828	-0.0647515	0.0363276	0.94688	1.05569	1.0459	0.975134
	TPM1	Tropomyosin alpha-1 chain					0	0	0	0	0	YES	77.2162	105.796	91.506	89.6059	107.822	98.7138	70.6542	78.7389	74.6966	36.8752	27.6863	32.2807	74.2993		0	5.2919	2511100000	1469100000	1041900000	8.55143	8.6013	8.56932	8.50385	0.000196564	0.00250752	0.294508	0.706719	-0.846039	-0.674521	-0.358214	-0.141001	1.79756	1.59607	1.28184	1.10267	+	+
	SNRNP70	U1 small nuclear ribonucleoprotein 70 kDa					0	0	0	0	0	YES	73.1632	75.8361	74.4996	73.0064	57.1403	65.0734	92.7887	89.6751	91.2319	71.7867	60.9368	66.3617	74.2916		0	32.188	2963000000	1396100000	1566900000	8.65054	8.59305	8.74529	8.61012	0.441158	0.889977	0.730259	0.826904	0.143524	0.032524	0.0855606	0.0813396	0.905305	0.977708	0.942418	0.94518
	SURF4	Surfeit locus protein 4					0	0	0	0	0	YES	68.1963	75.8965	72.0464	60.001	58.0157	59.0084	93.9069	72.0226	82.9647	84.6891	80.6593	82.6742	74.1734		0	14.976	2123400000	1210700000	912700000	8.48993	8.43767	8.57357	8.56442	0.0391783	0.140782	0.0570752	0.0892461	-0.472069	-0.376882	-0.639085	-0.667676	1.3871	1.29853	1.55734	1.58851	+
	FHL2	Four and a half LIM domains protein 2					0	0	0	0	0	YES	76.4569	73.7269	75.0919	33.0609	54.2011	43.631	97.6749	87.0772	92.376	93.3084	74.9898	84.1491	73.812		0	45.011	2309900000	931640000	1378300000	8.59106	8.55381	8.8276	8.78947	0.782702	0.311552	0.137728	0.0862189	-0.0698607	0.318461	0.413377	0.578117	1.04962	0.801925	0.750864	0.669837
	THOP1	Thimet oligopeptidase					0	0	0	0	0	YES	159.138	51.3372	105.238	60.6757	78.7184	69.6971	65.2778	38.1407	51.7093	107.068	28.5424	67.8052	73.6123		0	24.119	3058000000	1373400000	1684600000	8.90613	8.62869	8.81842	8.66462	0.574687	0.619053	0.31015	0.532343	0.102457	0.116897	0.278342	0.215989	0.931446	0.922169	0.824538	0.860956
	SAE1	SUMO-activating enzyme subunit 1;SUMO-activating enzyme subunit 1, N-terminally processed					0	0	0	0	0	YES	53.9373	64.8395	59.3884	111.917	97.1792	104.548	46.0289	69.268	57.6485	57.484	79.8832	68.6836	72.5672		0	40.326	2445000000	1095300000	1349700000	8.50459	8.78442	8.64387	8.6206	0.245279	0.275014	0.626331	0.44119	0.220454	0.256648	0.126444	0.264356	0.858295	0.83703	0.916087	0.83257
	GALNT2	Polypeptide N-acetylgalactosaminyltransferase 2;Polypeptide N-acetylgalactosaminyltransferase 2 soluble form			0		0	0	0	0	1	NO	6.70374	0	3.35187	14.1297	0	7.06486	559.601	0	279.8	0	0	0	72.5543		0	5.9216	1897400000	732920000	1164400000	7.1502	7.56239	9.26179	7.29041	1	1	1	1	NaN	NaN	NaN	NaN	NaN	NaN	NaN	NaN
	SERPINB1	Leukocyte elastase inhibitor					0	0	0	0	0	YES	75.2335	116.387	95.8101	56.7637	37.9758	47.3697	42.7885	68.3929	55.5907	115.656	66.6902	91.1731	72.4859		0	38.367	3008400000	1369000000	1639500000	8.67141	8.44419	8.73718	8.79957	0.793301	0.485252	0.34769	0.607099	-0.0667598	0.230326	0.256528	-0.195913	1.04736	0.852442	0.8371	1.14545
	GNL3	Guanine nucleotide-binding protein-like 3					0	0	0	0	0	YES	92.1415	74.4249	83.2832	112.009	99.0854	105.547	52.6192	48.917	50.7681	56.5187	42.3721	49.4454	72.261		0	31.417	3972300000	1593900000	2378500000	8.63615	8.92659	8.46672	8.45927	0.458335	0.734707	0.950668	0.69762	0.137897	-0.0756264	-0.0295586	0.164014	0.908843	1.05382	1.0207	0.892538
	DEK	Protein DEK					0	0	0	0	0	YES	21.7706	29.8721	25.8213	145.787	131.938	138.863	77.5014	13.7971	45.6492	101.395	54.0683	77.7316	72.0162		0	19.524	2491400000	925460000	1566000000	8.28499	8.99683	8.67281	8.77661	0.000108731	0.00108898	0.0342544	0.0865394	0.930548	0.767994	0.595408	0.577538	0.524659	0.587234	0.661857	0.670107	+	+
	CRYZ	Quinone oxidoreductase					0	0	0	0	0	YES	51.3488	147.253	99.3009	84.4483	0	42.2242	91.3788	29.3689	60.3738	108.322	62.2165	85.2692	71.792		0	78.973	2726900000	1338100000	1388800000	8.69626	8.37634	8.64906	8.81316	0.893521	0.324551	0.954124	0.999713	-0.0379026	-0.240657	-0.0325363	0.00863036	1.02662	1.18153	1.02281	0.994036
	LYPLA1	Acyl-protein thioesterase 1					0	0	0	0	0	YES	30.2676	39.4183	34.8429	37.2507	35.0652	36.1579	93.7125	133.506	113.609	87.1338	115.972	101.553	71.5407		0	17.57	2052500000	899640000	1152800000	8.2303	8.32701	8.85407	8.8295	0.744268	0.705215	0.988138	0.655298	-0.106778	0.140648	-0.0185127	0.156914	1.07682	0.907112	1.01291	0.896941
	GRSF1	G-rich sequence factor 1					0	0	0	0	0	YES	17.072	25.4975	21.2847	53.9454	18.6367	36.2911	115.729	102.721	109.225	124.667	112.107	118.387	71.297		0	26.163	1907000000	1013900000	893060000	8.06506	8.44075	8.77843	8.76826	0.609912	0.193005	0.894008	0.572637	-0.157254	0.399773	-0.0574217	-0.215798	1.11516	0.757978	1.0406	1.16135
	ZNF207	BUB3-interacting and GLEBS motif-containing protein ZNF207					0	0	0	0	0	YES	43.4098	68.0893	55.7496	61.4762	56.1762	58.8262	116.028	105.481	110.755	55.4311	63.4346	59.4328	71.1909		0	86.096	2438000000	1141700000	1296300000	8.48227	8.52143	8.89652	8.59952	0.0790469	0.900935	0.708056	0.588565	0.337197	0.0694272	0.0941009	0.188274	0.791578	0.953016	0.936856	0.877655
	CCBL2	Kynurenine--oxoglutarate transaminase 3					0	0	0	0	0	YES	99.1062	103.854	101.48	51.5125	74.3122	62.9123	62.4434	64.2704	63.3569	61.6464	51.7075	56.6769	71.1066		0	18.236	2107700000	1009600000	1098100000	8.73554	8.54444	8.57566	8.52684	0.743734	0.592234	0.980434	0.818601	0.0564447	-0.115097	-0.0216872	0.0848807	0.961631	1.08305	1.01515	0.942862
	VDAC3	Voltage-dependent anion-selective channel protein 3					0	0	0	0	0	YES	90.8759	99.6241	95.25	0	33.3782	16.6891	156.674	65.976	111.325	67.6165	54.2884	60.9524	71.0541		0	26.758	1633100000	929500000	703590000	8.62316	8.19033	8.6813	8.4831	0.316509	0.625007	0.00648413	0.177937	-0.233278	-0.102016	-0.908469	-0.588227	1.1755	1.07327	1.87705	1.5034
	YTHDF2	YTH domain-containing family protein 2					0	0	0	0	0	YES	66.3154	95.575	80.9452	59.7708	88.528	74.1494	70.6607	40.5502	55.6055	103.354	43.1173	73.2356	70.9839		0	19.792	3129600000	1425500000	1704100000	8.68173	8.74702	8.64348	8.70976	0.255956	0.495089	0.945879	0.804011	0.215368	0.160404	0.00590291	0.0911243	0.861326	0.894775	0.995917	0.938791
	REXO2	Oligoribonuclease, mitochondrial					0	0	0	0	0	YES	77.6302	88.2626	82.9464	18.4822	3.86297	11.1726	117.949	119.112	118.53	90.9342	51.3955	71.1648	70.9536		0	41.381	1932900000	867090000	1065800000	8.68956	7.81985	8.85795	8.74858	0.832248	0.773152	0.97072	0.487302	-0.0554564	0.122474	-0.025691	0.239276	1.03919	0.918611	1.01797	0.84717
	CSNK2B;CSNK2B-LY6G5B-1181;CSNK2B-LY6G5B--991	Casein kinase II subunit beta					0	0	0	0	0	YES	67.6614	103.673	85.6673	52.8963	127.319	90.1077	24.3879	31.2272	27.8075	70.6528	86.7572	78.705	70.5719		0	27.46	2383400000	1113000000	1270500000	8.70601	8.66875	8.31942	8.6625	0.941735	0.381186	0.279508	0.802286	-0.0242231	0.205893	0.336512	-0.0908951	1.01693	0.867002	0.791954	1.06503
	TXNDC12	Thioredoxin domain-containing protein 12					0	0	0	0	0	YES	67.8286	55.4066	61.6176	88.1784	100.786	94.4823	90.6333	43.8804	67.2568	64.5652	52.8004	58.6828	70.5099		0	16.609	2585800000	1290000000	1295800000	8.52582	8.70461	8.59324	8.4663	0.86796	0.570361	0.952645	0.443774	0.024887	0.133432	0.00345838	-0.322686	0.982898	0.91166	0.997606	1.25066
	PLOD3	Procollagen-lysine,2-oxoglutarate 5-dioxygenase 3					0	0	0	0	0	YES	76.8127	99.2086	88.0106	49.0826	49.1776	49.1301	33.8394	59.2386	46.539	84.8928	110.991	97.9417	70.4054		0	22.204	2433100000	1178700000	1254400000	8.64823	8.52603	8.58225	8.79857	0.920717	0.774051	0.233719	0.980063	0.0117819	-0.0456846	0.328951	0.0170666	0.991867	1.03217	0.796115	0.98824
	GLOD4	Glyoxalase domain-containing protein 4					0	0	0	0	0	YES	64.1735	108.757	86.4653	79.3444	92.2011	85.7728	74.6904	41.2825	57.9865	58.5575	38.8107	48.6841	69.7271		0	14.69	2994700000	1313600000	1681100000	8.8044	8.71133	8.68307	8.55942	0.216261	0.22012	0.0394966	0.173452	0.235114	0.288299	0.578697	0.460481	0.849618	0.818867	0.669568	0.726744
	PSMD10	26S proteasome non-ATPase regulatory subunit 10					0	0	0	0	0	YES	84.7549	81.6679	83.2114	46.9781	30.0746	38.5263	99.6926	77.7565	88.7245	60.207	74.2723	67.2396	69.4255		0	14.695	2419100000	1078200000	1340900000	8.63746	8.37304	8.78559	8.71074	0.414891	0.733574	0.450107	0.532589	0.152378	0.130008	0.20364	0.215865	0.899766	0.913826	0.868357	0.86103
	PCK2	Phosphoenolpyruvate carboxykinase [GTP], mitochondrial					0	0	0	0	0	YES	27.9728	49.2651	38.6189	35.2583	43.404	39.3312	102.828	92.8656	97.847	133.686	70.0584	101.872	69.4173		0	22.491	1831400000	977710000	853700000	8.38516	8.39092	8.66064	8.6995	0.136298	0.100755	0.0257471	0.0643083	0.347552	-0.423894	-0.746664	-0.727642	0.785916	1.34154	1.67791	1.65593
	EIF3M	Eukaryotic translation initiation factor 3 subunit M					0	0	0	0	0	YES	104.057	78.5933	91.3252	119.508	49.2883	84.3981	44.9253	61.6311	53.2782	39.4414	56.0473	47.7443	69.1865		0	83.013	2020100000	957110000	1063000000	8.71225	8.51399	8.53047	8.49517	0.82293	0.870867	0.726921	0.747582	0.0361869	0.0801119	0.103263	0.140517	0.975229	0.945984	0.930925	0.907194
	PFDN2	Prefoldin subunit 2					0	0	0	0	0	YES	88.9735	81.7585	85.366	77.8401	0	38.9201	69.1244	90.3245	79.7245	70.0213	72.389	71.2052	68.8039		0	18.143	2480100000	1165300000	1314900000	8.64559	8.60665	8.66608	8.65268	0.253319	0.62827	0.884504	0.585415	0.21661	0.113834	-0.0613754	0.189793	0.860585	0.924129	1.04346	0.876732
	SLC9A3R1	Na(+)/H(+) exchange regulatory cofactor NHE-RF1					0	0	0	0	0	YES	85.9409	73.798	79.8694	91.2637	93.99	92.6269	89.272	10.0797	49.6758	76.7499	25.674	51.2119	68.346		0	47.434	2428200000	1332000000	1096200000	8.56598	8.72111	8.55024	8.50036	0.256952	0.607067	0.260487	0.740232	-0.262988	-0.114769	-0.383511	-0.124299	1.19996	1.0828	1.30451	1.08998
	ACSL4	Long-chain-fatty-acid--CoA ligase 4					0	0	0	0	0	YES	60.5837	113.554	87.0688	135.41	71.1494	103.28	25.6779	37.721	31.6995	29.3559	73.1675	51.2617	68.3275		0	27.058	2088000000	924560000	1163500000	8.68307	8.78602	8.4655	8.53545	0.822372	0.903292	0.392804	0.113301	0.0363276	-0.0271162	0.264236	0.534261	0.975134	1.01897	0.832639	0.690512
	COPS6	COP9 signalosome complex subunit 6					0	0	0	0	0	YES	111.221	70.7529	90.9869	62.6766	0	31.3383	50.7619	92.963	71.8625	72.9362	79.7486	76.3424	67.6325		0	16.509	2388700000	1056500000	1332200000	8.63845	8.5575	8.77193	8.73122	0.37826	0.844982	0.189282	0.486148	0.165301	0.0893625	0.364012	0.239887	0.891742	0.939938	0.777001	0.846812
	USP7	Ubiquitin carboxyl-terminal hydrolase 7;Ubiquitin carboxyl-terminal hydrolase					0	0	0	0	0	YES	50.7073	57.4092	54.0583	81.2478	34.4867	57.8673	43.833	111.457	77.6447	75.6521	84.3022	79.9771	67.3868		0	23.045	2021300000	947780000	1073600000	8.42259	8.63341	8.73574	8.66034	0.851023	0.304744	0.77208	0.997587	0.0287106	-0.229044	0.0697022	0.0097772	0.980296	1.17206	0.952835	0.993246
	SRSF9	Serine/arginine-rich splicing factor 9					0	0	0	0	0	YES	43.9551	38.5246	41.2398	78.4311	56.0238	67.2274	77.8911	114.866	96.3787	62.8586	65.8579	64.3582	67.301		0	13.035	2839100000	1330500000	1508600000	8.29367	8.57834	8.79406	8.69143	0.749178	0.303665	0.949857	0.153298	0.0610158	0.24184	0.00446549	0.482642	0.958589	0.845666	0.99691	0.715666
	FAM107B	Protein FAM107B					0	0	0	0	0	YES	61.749	64.7058	63.2274	135.472	40.3035	87.8877	47.8756	52.5946	50.2351	68.1391	67.1488	67.6439	67.2485		0	21.117	1819100000	935650000	883490000	8.45773	8.64819	8.45401	8.56514	0.387336	0.528867	0.136873	0.900723	-0.202389	-0.140539	-0.526681	-0.0408827	1.1506	1.10232	1.44061	1.02874
	TTC1	Tetratricopeptide repeat protein 1					0	0	0	0	0	YES	60.8336	58.9405	59.887	80.1119	100.86	90.4858	62.227	75.3259	68.7765	54.2314	45.3569	49.7941	67.2359		0	4.1213	2100400000	979240000	1121100000	8.56539	8.69619	8.56602	8.45176	0.903986	0.785282	0.409414	0.658959	0.0159258	0.0640551	-0.284792	-0.174459	0.989022	0.956572	1.21823	1.12854
	HK2	Hexokinase-2					0	0	0	0	0	YES	54.3807	59.6551	57.0179	110.843	20.7804	65.8116	69.2516	10.3419	39.7968	114.058	93.4016	103.73	66.589		0	25.63	2840900000	1709800000	1131000000	8.43154	8.60078	8.382	8.65291	0.514895	0.00015182	0.0112559	0.000787436	-0.195946	-0.845391	-0.891803	-1.32757	1.14548	1.79675	1.85549	2.50979		+
	RSL1D1	Ribosomal L1 domain-containing protein 1					0	0	0	0	0	YES	68.4622	78.7217	73.592	59.1123	93.1689	76.1406	64.3152	65.5961	64.9556	45.7837	54.6345	50.2091	66.2243		0	84.527	2209500000	976560000	1233000000	8.60478	8.63984	8.66423	8.61811	0.788109	0.320858	0.25738	0.640754	0.0450235	0.233397	0.3122	0.163628	0.969274	0.850629	0.805412	0.892777
	TSN	Translin					0	0	0	0	0	YES	64.2698	81.6376	72.9537	58.6349	57.0025	57.8187	58.5766	85.283	71.9298	58.4251	65.9308	62.1779	66.22		0	43.782	2653600000	1063400000	1590200000	8.56378	8.5434	8.74164	8.65398	0.127328	0.519778	0.449063	0.62368	0.291721	0.215119	0.204141	0.171591	0.816927	0.861475	0.868056	0.887863
	ABHD14B	Alpha/beta hydrolase domain-containing protein 14B					0	0	0	0	0	YES	53.685	2.90971	28.2973	75.9045	79.3783	77.6414	95.7869	59.7493	77.7681	75.9075	85.506	80.7067	66.1034		0	22.035	1924300000	1062900000	861430000	8.059	8.49813	8.71389	8.65153	0.492187	0.125461	0.317311	0.887425	-0.205713	-0.393463	-0.342342	0.0557509	1.15326	1.31354	1.26781	0.962094
	NUDT21	Cleavage and polyadenylation specificity factor subunit 5					0	0	0	0	0	YES	99.9499	37.118	68.534	48.0272	89.3418	68.6845	87.5379	56.6854	72.1117	64.6835	44.5657	54.6246	65.9887		0	38.715	1945100000	890720000	1054400000	8.66575	8.57755	8.6487	8.54401	0.776639	0.495746	0.317311	0.240936	0.0479571	0.225645	0.274053	0.397913	0.967305	0.855213	0.826993	0.758956
	CBX5	Chromobox protein homolog 5					0	0	0	0	0	YES	146.753	76.5688	111.661	37.5501	43.2589	40.4045	97.0266	46.354	71.6903	47.075	31.9557	39.5153	65.8178		0	22.048	2663300000	1110700000	1552700000	8.83538	8.47608	8.78539	8.59448	0.177854	0.00185488	0.27196	0.0748639	0.25689	0.907891	0.302407	0.599889	0.83689	0.532964	0.810899	0.659805		+
	PITPNB	Phosphatidylinositol transfer protein beta isoform					0	0	0	0	0	YES	76.835	51.863	64.349	113.698	84.7376	99.2177	5.58685	79.942	42.7644	69.2393	42.5946	55.9169	65.562		0	12.546	2221800000	989980000	1231800000	8.59936	8.79837	8.4627	8.44492	0.576087	0.712905	0.960913	0.149597	0.102053	0.086512	0.00762616	-0.631086	0.931706	0.941797	0.994728	1.54873
	HLA-A	HLA class I histocompatibility antigen, A-68 alpha chain					0	0	0	0	0	YES	44.8362	66.5127	55.6745	38.9047	34.8474	36.8761	91.5813	89.7481	90.6647	79.6898	75.0603	77.375	65.1476		0	40.699	2481300000	1133500000	1347800000	8.43529	8.75505	8.65204	8.57162	0.391373	0.10798	0.0583526	0.156328	-0.252432	-0.358713	-0.635898	-0.555481	1.19121	1.28228	1.5539	1.46966
	CPNE1	Copine-1					0	0	0	0	0	YES	18.9775	53.546	36.2618	79.9277	14.9167	47.4222	99.725	83.8055	91.7652	85.0965	84.2706	84.6835	65.0332		0	65.126	2304100000	996710000	1307400000	8.34854	8.58708	8.78635	8.80483	0.0368036	0.586069	0.486642	0.140126	0.494057	0.128029	0.186501	0.498353	0.710026	0.915081	0.878735	0.707914	+
	PKP1	Plakophilin-1					0	1	0	0	0	NO	0	0	0	0	19.482	9.74101	252.89	216.889	234.89	29.8543	0	14.9272	64.8894		0	103.04	786330000	643920000	142410000	NaN	7.65971	8.8255	7.85445	1	1	7.75775e-13	1	NaN	NaN	-2.369	NaN	NaN	NaN	5.16582	NaN
	RBM4B;MST4	Serine/threonine-protein kinase MST4					0	0	0	0	0	YES	84.0305	77.3242	80.6774	32.2597	0	16.1298	95.4465	68.4408	81.9436	57.4621	102.469	79.9657	64.6791		0	16.55	2660500000	1208700000	1451800000	8.64435	7.98733	8.74914	8.74875	0.840839	1	0.759337	0.854324	0.0316775	NaN	0.0745054	0.0697022	0.978282	NaN	0.949668	0.952835
	CCAR1	Cell division cycle and apoptosis regulator protein 1					0	0	0	0	0	YES	106.66	58.8068	82.7334	54.7866	21.9014	38.344	100.187	60.0285	80.1077	82.926	29.6931	56.3095	64.3737		0	42.406	2312200000	1085600000	1226600000	8.70407	8.50069	8.67202	8.67138	0.454301	0.908243	0.737691	0.715455	0.139208	0.00230651	-0.123717	0.129745	0.908018	0.998403	1.08954	0.913993
	IDH3B	Isocitrate dehydrogenase [NAD] subunit beta, mitochondrial					0	0	0	0	0	YES	119.483	64.6144	92.0487	33.7786	35.9647	34.8716	76.371	98.2967	87.3339	62.8727	23.2601	43.0664	64.3302		0	18.38	2104200000	911300000	1192900000	8.64934	8.2987	8.96896	8.4276	0.474659	0.654314	0.946036	0.69034	-0.168723	0.160146	-0.0358749	0.167486	1.12406	0.894935	1.02518	0.890393
	MPST	3-mercaptopyruvate sulfurtransferase;Sulfurtransferase					0	0	0	0	0	YES	158.581	100.855	129.718	57.3716	118.536	87.9537	34.9568	11.3519	23.1543	32.0812	0	16.0406	64.2167		0	19.027	2692800000	1421300000	1271500000	8.88695	8.78716	8.21352	8.20981	0.0790774	0.588564	0.600575	0.573093	-0.403122	-0.120718	-0.190553	0.225645	1.32237	1.08728	1.1412	0.855213
	VASP	Vasodilator-stimulated phosphoprotein					0	0	0	0	0	YES	58.6918	37.736	48.2139	76.2982	2.65635	39.4773	86.5574	95.2929	90.9252	80.9592	74.9708	77.965	64.1453		0	30.264	2401600000	1246700000	1154900000	8.38783	8.37745	8.69352	8.58629	0.717946	0.334125	0.43765	0.136539	-0.116379	-0.235263	-0.268765	-0.583852	1.08401	1.17712	1.20478	1.49885
	RCC2	Protein RCC2					0	0	0	0	0	YES	29.2782	35.2983	32.2882	43.6026	30.4808	37.0417	67.2566	99.003	83.1298	105.007	100.006	102.507	63.7416		0	60.403	2351600000	1000300000	1351400000	8.24944	8.28037	8.85577	8.86406	0.0238576	0.676656	0.460113	0.765956	0.536053	-0.0819802	0.198871	0.107554	0.689655	1.05847	0.871232	0.92816	+
	DDOST	Dolichyl-diphosphooligosaccharide--protein glycosyltransferase 48 kDa subunit					0	0	0	0	0	YES	19.3779	40.8981	30.138	21.048	9.2663	15.1571	90.7629	128.952	109.857	94.9304	102.58	98.7553	63.4769		0	13.193	1573700000	890890000	682830000	8.13564	7.93952	8.7169	8.59585	0.466805	0.121145	0.0177663	0.00465582	-0.21692	-0.510395	-0.792832	-1.11769	1.16225	1.42444	1.73247	2.17
	PTER	Phosphotriesterase-related protein					0	0	1	0	0	NO	207.947	0	103.974	0	0	0	4.41757	0	2.20879	293.34	0	146.67	63.2131		0	2.1663	1159700000	1122300000	37381000	8.41706	NaN	7.11224	8.60363	1	1	1	0.00031989	NaN	NaN	NaN	-1.42368	NaN	NaN	NaN	2.68269
	SNX3	Sorting nexin-3					0	0	0	0	0	YES	63.0774	66.3035	64.6905	79.2907	66.1662	72.7284	43.2933	68.6681	55.9807	54.1593	63.7957	58.9775	63.0943		0	12.432	3671900000	1327400000	2344500000	8.42495	9.05881	8.48548	8.5183	0.138026	1.66029e-64	0.636956	0.893013	-0.424184	3.98723	-0.172555	-0.0447616	1.34181	0.0630557	1.12705	1.03151		+
	CIAPIN1	Anamorsin					0	0	0	0	0	YES	89.4829	79.8171	84.65	27.9808	149.424	88.7022	41.7132	28.7527	35.2329	59.8418	26.7692	43.3055	62.9727		0	20.369	2442300000	1092300000	1350000000	8.61321	8.78933	8.37321	8.49181	0.648083	0.426074	0.722813	0.392287	-0.110526	0.187134	0.105008	0.328492	1.07962	0.878349	0.9298	0.796369
	EBNA1BP2	Probable rRNA-processing protein EBP2					0	0	0	0	0	YES	38.1349	36.7131	37.424	50.4433	50.9782	50.7108	69.2006	101.528	85.3642	66.9371	88.6975	77.8173	62.8291		0	28.416	2702900000	1131800000	1571100000	8.42287	8.51716	8.8455	8.76284	0.263127	0.192605	0.20073	0.12391	0.256769	0.400101	0.354452	0.519341	0.83696	0.757805	0.782167	0.697691
	NRBP1	Nuclear receptor-binding protein					0	0	0	0	0	YES	32.5592	112.3	72.4295	98.4475	0	49.2238	96.4351	41.3264	68.8807	0	120.161	60.0807	62.6537		0	35.487	2705700000	1409200000	1296600000	8.53676	8.78145	8.65302	8.48457	0.400852	0.738609	0.766746	0.460637	-0.196905	-0.0744715	-0.111134	-0.309878	1.14624	1.05298	1.08008	1.2396
	CYFIP1;CYFIP2	Cytoplasmic FMR1-interacting protein 1;Cytoplasmic FMR1-interacting protein 2					0	0	0	0	0	YES	54.8893	62.2242	58.5568	78.1625	79.8402	79.0013	10.1119	125.087	67.5995	69.273	21.3785	45.3257	62.6208		0	13.535	3052000000	1368400000	1683600000	8.67228	8.61728	8.61246	8.7153	0.487234	0.95246	0.885589	0.757663	0.128689	-0.0133051	-0.0609239	0.111165	0.914662	1.00927	1.04313	0.92584
	AP2A1	AP-2 complex subunit alpha-1					0	0	0	0	0	YES	75.8941	33.2337	54.5639	31.3793	31.4485	31.4139	142.59	77.2662	109.928	58.4188	50.2527	54.3358	62.5605		0	42.731	2689600000	1131900000	1557700000	8.53975	8.22889	8.87973	8.56179	0.818488	0.128566	0.893503	0.946667	-0.0594348	-0.38998	0.024887	0.0309717	1.04206	1.31038	0.982898	0.978761
	PPP2R2A;PPP2R2D	Serine/threonine-protein phosphatase 2A 55 kDa regulatory subunit B alpha isoform;Serine/threonine-protein phosphatase 2A 55 kDa regulatory subunit B delta isoform					0	0	0	0	0	YES	80.2497	27.621	53.9353	28.8681	33.8621	31.3651	129.334	47.2138	88.2737	88.4659	63.2865	75.8762	62.3626		0	58.724	2051000000	926110000	1124900000	8.42978	8.31086	8.77685	8.66143	0.617145	0.940018	0.777573	0.580971	0.105142	0.0556121	0.0676387	0.191942	0.929714	0.962186	0.954198	0.875427
	S100A13	Protein S100-A13					0	0	0	0	0	YES	98.7003	85.936	92.3181	95.6231	82.7728	89.198	17.7839	46.7802	32.2821	25.3041	44.9071	35.1056	62.2259		0	4.2975	2148900000	956330000	1192600000	8.64778	8.79461	8.47793	8.32934	0.634642	0.385543	0.106785	0.747863	-0.114754	0.204015	0.505789	0.140386	1.08279	0.868131	0.704275	0.907276
	C19orf10	UPF0556 protein C19orf10					0	0	0	0	0	YES	94.219	79.6962	86.9576	18.747	15.6748	17.2109	103.477	38.4167	70.9467	57.2012	88.943	73.0721	62.0468		0	17.04	1494000000	788280000	705770000	8.59818	7.90546	8.54971	8.53395	0.317274	0.0303194	0.110599	0.0518694	-0.232922	-0.723491	-0.538094	-0.765131	1.17521	1.65117	1.45205	1.69952		+
	PPM1G	Protein phosphatase 1G					0	0	0	0	0	YES	96.6785	52.215	74.4468	0	45.6497	22.8248	50.1655	124.819	87.4924	72.4394	53.5749	63.0071	61.9428		0	14.072	1408600000	741380000	667260000	8.53312	7.96555	8.64875	8.6237	0.631236	1	0.189544	0.275843	0.086512	NaN	0.363788	0.370388	0.941797	NaN	0.777122	0.773575
	HINT2	Histidine triad nucleotide-binding protein 2, mitochondrial					0	0	1	0	0	NO	92.5793	93.0066	92.7929	0	0	0	125.12	42.3208	83.7205	68.8498	73.0931	70.9715	61.8712		0	15.554	1812200000	920500000	891680000	8.79238	NaN	8.69654	8.557	0.616575	1	0.118993	0.14	0.0905825	NaN	-0.526099	-0.578672	0.939143	NaN	1.44003	1.49347
	ENSA	Alpha-endosulfine					0	0	0	0	0	YES	91.1545	65.9326	78.5435	12.2056	74.1876	43.1966	68.7411	67.8822	68.3117	48.2073	65.3566	56.7819	61.7084		0	11.432	1984400000	922150000	1062200000	8.67864	8.47983	8.60676	8.58215	0.597538	0.276227	0.660736	0.678064	-0.126628	-0.269616	-0.157898	0.146525	1.09174	1.20549	1.11566	0.903424
	ESYT1	Extended synaptotagmin-1					0	0	0	0	0	YES	22.7512	52.2226	37.4869	43.0615	26.9455	35.0035	42	56.5945	49.2973	136.366	111.014	123.69	61.3695		0	13.275	2410700000	1201000000	1209700000	8.30544	8.44711	8.5645	8.81865	0.986007	0.343301	0.698177	0.141532	-0.0220974	0.300417	-0.141096	-0.576411	1.01543	0.812018	1.10274	1.49114
	PAIP1	Polyadenylate-binding protein-interacting protein 1					0	1	0	0	0	NO	0	0	0	0	70.3855	35.1927	107.625	34.4347	71.0301	224.81	52.6744	138.742	61.2413		0	51.81	1610100000	873770000	736280000	NaN	7.96481	8.68476	8.63796	1	2.43544e-13	0.0237933	0.0014855	NaN	-2.50758	-0.756672	-1.25605	NaN	5.68667	1.68959	2.3884		+
	SUGT1	Suppressor of G2 allele of SKP1 homolog					0	0	0	0	0	YES	29.0991	42.035	35.5671	88.7617	109.078	98.92	82.6841	38.0043	60.3442	70.7994	28.9376	49.8685	61.1749		0	40.967	2447400000	1021300000	1426100000	8.40092	8.76658	8.66281	8.68437	0.883383	0.783668	0.982885	0.972483	-0.0575268	-0.0612701	-0.020677	-0.00495696	1.04068	1.04338	1.01444	1.00344
	SF3A3	Splicing factor 3A subunit 3					0	0	0	0	0	YES	59.9525	61.3457	60.6491	68.0376	75.324	71.6808	46.114	62.0013	54.0576	45.9427	70.0972	58.0199	61.1019		0	54.366	2151900000	920790000	1231100000	8.48615	8.65815	8.61332	8.69632	0.686067	0.615867	0.53632	0.286073	0.0716254	0.117961	0.164271	0.362779	0.951565	0.921489	0.892379	0.777665
	DMD	Dystrophin					0	0	1	0	0	NO	0	5.52858	2.76429	0	0	0	173.374	0	86.6871	308.855	0	154.427	60.9697		0	8.5337	668680000	636400000	32284000	7.02559	NaN	8.35698	8.60534	1	1	1.54162e-18	7.75385e-20	NaN	NaN	-3.07181	-3.62012	NaN	NaN	8.4083	12.296
	CTNNA1	Catenin alpha-1					0	0	0	0	0	YES	86.4821	87.9907	87.2364	44.8613	22.2871	33.5742	57.3068	58.3765	57.8416	78.9768	50.9868	64.9818	60.9085		0	82.973	2129800000	986840000	1142900000	8.63324	8.36434	8.71951	8.61766	0.977902	0.956594	0.314112	0.7883	-0.0140042	0.0497701	0.275961	0.0978804	1.00975	0.96609	0.8259	0.934405
	PLAA	Phospholipase A-2-activating protein					0	0	0	0	0	YES	65.061	63.1073	64.0842	18.3901	47.3242	32.8572	44.5955	62.6053	53.6004	84.4853	98.7393	91.6123	60.5385		0	49.637	2059300000	1030000000	1029300000	8.57088	8.39261	8.53396	8.69354	0.86584	0.198979	0.715688	0.344171	-0.0458037	-0.324256	-0.133353	-0.367769	1.03226	1.25202	1.09684	1.29036
	UBA2	SUMO-activating enzyme subunit 2					0	0	0	0	0	YES	51.1673	68.7473	59.9573	16.5811	99.0047	57.7929	53.8306	69.5505	61.6906	67.4887	54.8341	61.1614	60.1505		0	59.45	2838200000	1165400000	1672800000	8.7218	8.52852	8.6469	8.67164	0.096742	0.610387	0.659734	0.373394	0.318461	0.177471	0.113034	0.304161	0.801925	0.884251	0.924642	0.809913
	RAD23A	UV excision repair protein RAD23 homolog A					0	0	0	0	0	YES	55.8365	81.4563	68.6464	0	57.3471	28.6735	68.9858	121.604	95.2951	49.4672	46.0855	47.7764	60.0979		0	7.901	2584200000	1190700000	1393400000	8.68403	8.56672	8.78196	8.55111	0.945094	0.43918	0.642077	0.216991	0.00575919	0.251568	0.120086	0.41846	0.996016	0.839983	0.920133	0.748223
	EPB41L1	Band 4.1-like protein 1					0	0	0	0	0	YES	140.138	102.268	121.203	59.7577	65.1859	62.4718	18.2758	28.6926	23.4842	28.1155	38.1352	33.1254	60.0712		0	28.818	2377000000	949290000	1427700000	8.97236	8.535	8.1113	8.54114	0.486921	0.757115	0.309091	0.468634	-0.164286	0.121281	0.31603	0.249263	1.12061	0.919371	0.803277	0.841326
	SNX1	Sorting nexin-1					0	0	0	0	0	YES	51.1371	38.1197	44.6284	44.3885	23.4374	33.9129	43.6288	71.7522	57.6905	113.305	94.249	103.777	60.0023		0	29.809	2077200000	970160000	1107000000	8.35595	8.26715	8.58311	8.80082	0.493121	0.44174	0.614999	0.714864	0.15056	0.250355	0.131063	-0.136648	0.900901	0.840689	0.913159	1.09935
	PPID	Peptidyl-prolyl cis-trans isomerase D					0	0	0	0	0	YES	62.7877	93.0293	77.9085	63.0166	100.178	81.5972	46.4989	45.2848	45.8919	58.2613	7.98515	33.1232	59.6302		0	7.8275	2568300000	1158400000	1410000000	8.70431	8.76037	8.57763	8.52486	0.27029	0.919532	0.240702	0.166009	0.208767	0.0237521	0.323889	0.468427	0.865276	0.983671	0.798913	0.722752
	FAM136A	Protein FAM136A					0	0	0	0	0	YES	55.9034	64.7836	60.3435	27.1397	60.5231	43.8314	68.6536	69.0439	68.8488	72.9761	57.9979	65.487	59.6277		0	61.16	2151800000	921690000	1230100000	8.50203	8.52048	8.69053	8.6839	0.19342	0.175095	0.215086	0.256988	0.247685	0.415001	0.34301	0.384934	0.842247	0.750019	0.788395	0.765814
	CDC42	Cell division control protein 42 homolog					0	0	0	0	0	YES	50.3435	37.2767	43.8101	79.5823	82.6115	81.0969	95.9732	48.0256	71.9994	42.5702	38.0528	40.3115	59.3045		0	13.1	2020500000	962260000	1058300000	8.36177	8.63254	8.69814	8.39629	0.660412	0.75348	0.474902	0.656718	0.0903115	-0.0700879	-0.248502	0.183709	0.93932	1.04978	1.18797	0.880437
	RALY	RNA-binding protein Raly					0	0	0	0	0	YES	85.328	68.8915	77.1098	79.9661	3.42565	41.6959	65.6538	67.1556	66.4047	56.5461	47.2956	51.9208	59.2828		0	91.145	2198700000	1069100000	1129700000	8.54245	8.61182	8.61452	8.49933	0.639345	0.750001	0.817859	0.949122	-0.11327	0.0749164	-0.0893287	0.0496307	1.08168	0.949397	1.06388	0.966184
	ATP1B3	Sodium/potassium-transporting ATPase subunit beta-3					0	0	0	0	0	YES	23.3514	23.7956	23.5735	16.3593	14.2591	15.3092	87.9674	86.2166	87.092	129.807	92.4751	111.141	59.279		0	16.29	1084900000	655180000	429730000	8.04301	7.97037	8.57166	8.63656	0.68992	0.440646	0.00162078	0.000902275	-0.126738	-0.240912	-1.04978	-1.31251	1.09182	1.18174	2.07022	2.48373
	OXSR1	Serine/threonine-protein kinase OSR1					0	0	0	0	0	YES	78.7087	79.1221	78.9154	54.4904	71.244	62.8672	34.7956	48.1482	41.4719	64.0018	43.5782	53.79	59.2611		0	15.087	1676000000	772800000	903190000	8.61568	8.53541	8.47519	8.53743	0.408123	0.678817	0.261354	0.406215	0.154713	0.15069	0.349818	0.284396	0.898311	0.90082	0.784683	0.821085
	CCAR2	Cell cycle and apoptosis regulator protein 2					0	0	0	0	0	YES	66.4603	65.953	66.2066	77.2415	53.3653	65.3034	88.4211	34.9048	61.6629	56.6448	28.4394	42.5421	58.9288		0	36.521	2079500000	994000000	1085500000	8.51759	8.56282	8.62364	8.46592	0.999281	0.902875	0.498894	0.406192	-0.00797119	0.0687396	0.180912	0.319734	1.00554	0.953471	0.882145	0.801218
	PAPSS1	Bifunctional 3-phosphoadenosine 5-phosphosulfate synthase 1;Sulfate adenylyltransferase;Adenylyl-sulfate kinase					0	0	0	0	0	YES	45.66	47.851	46.7555	46.295	69.9536	58.1243	60.8479	70.062	65.4549	89.1241	39.8901	64.5071	58.7105		0	24.21	1845400000	815870000	1029500000	8.4137	8.33191	8.69476	8.6841	0.887486	0.649344	0.887288	0.846216	-0.0561012	0.162081	-0.0602168	0.0731348	1.03965	0.893735	1.04262	0.95057
	SPCS3	Signal peptidase complex subunit 3					0	0	0	0	0	YES	60.4229	43.9916	52.2072	69.7453	88.3521	79.0487	39.3325	57.8179	48.5752	29.6326	80.0495	54.841	58.668		0	6.0524	1782200000	964220000	818010000	8.39844	8.58958	8.50218	8.54259	0.688144	0.131353	0.542611	0.0354216	-0.1274	-0.336719	-0.220295	-0.828537	1.09232	1.26288	1.16497	1.77588
	PHPT1	14 kDa phosphohistidine phosphatase					0	0	0	0	0	YES	56.5465	45.7502	51.1483	54.6539	69.8173	62.2356	100.519	33.3119	66.9155	63.2653	44.1231	53.6942	58.4984		0	73.664	2255200000	1076800000	1178400000	8.44638	8.58077	8.62619	8.49549	0.752841	0.417056	0.798621	0.812319	0.0540844	0.190804	0.0597706	-0.0813084	0.963206	0.876117	0.959417	1.05798
	PREP	Prolyl endopeptidase					0	0	0	0	0	YES	38.7582	39.7522	39.2552	77.2338	200.224	138.729	36.0921	31.6201	33.8561	23.6115	19.7352	21.6734	58.3783		0	14.109	3641900000	1947100000	1694800000	8.28827	8.86302	8.41379	8.16014	0.86055	0.317311	0.467104	0.484617	0.0257376	-0.223172	0.22367	0.273337	0.982318	1.1673	0.856384	0.827404
	ATPAF1	ATP synthase mitochondrial F1 complex assembly factor 1					0	0	0	0	0	YES	40.3374	6.06583	23.2016	23.7312	16.548	20.1396	5.82249	185.406	95.6144	4.5431	184.301	94.4219	58.3444		0	1.4527	2252100000	1228600000	1023500000	8.2461	7.92996	8.95284	8.91216	0.0438004	0.00173775	0.105443	0.0954909	-0.570357	-1.05766	-0.545824	-0.654831	1.48489	2.08156	1.45985	1.57443	+	+
	TBCB	Tubulin-folding cofactor B					0	0	0	0	0	YES	66.8686	54.9398	60.9042	23.2216	60.8039	42.0127	54.8572	88.0676	71.4624	36.9817	76.7851	56.8834	57.8157		0	20.579	1815000000	931280000	883700000	8.45085	8.44929	8.60532	8.50942	0.483462	0.191316	0.975239	0.68877	-0.165531	-0.330465	-0.0046964	-0.150657	1.12158	1.25742	1.00326	1.11008
	SNRPD1	Small nuclear ribonucleoprotein Sm D1					0	0	0	0	0	YES	31.7297	23.5115	27.6206	88.0172	100.2	94.1085	93.4856	42.1341	67.8098	32.0225	49.494	40.7582	57.5743		0	28.636	2248100000	1006300000	1241800000	8.07063	8.71061	8.63891	8.47816	0.193864	0.596555	0.742393	0.143223	-0.37372	0.124461	0.0809305	0.542803	1.29569	0.917347	0.945448	0.686436
	NMT1	Glycylpeptide N-tetradecanoyltransferase 1					0	0	0	0	0	YES	94.6886	150.849	122.769	89.5829	25.5298	57.5563	30.0163	9.68679	19.8516	31.7764	23.5516	27.664	56.9601		0	28.522	1690500000	853650000	836810000	8.72032	8.60065	8.29975	8.33169	0.905744	0.392827	0.233823	0.884446	-0.0344263	-0.190701	0.37128	-0.0392363	1.02415	1.14132	0.773096	1.02757
	AK3	GTP:AMP phosphotransferase AK3, mitochondrial					0	0	0	0	0	YES	79.8597	72.3528	76.1063	69.2886	19.6697	44.4792	75.4691	40.3814	57.9252	50.2116	48.2554	49.2335	56.936		0	21.076	1876100000	903780000	972310000	8.58424	8.3824	8.69462	8.48639	0.184122	0.317311	0.547605	0.527951	-0.306787	0.315102	0.159371	-0.261154	1.23695	0.803794	0.895416	1.19844
	DCTN1;DKFZp686E0752	Dynactin subunit 1					0	0	0	0	0	YES	84.3489	52.6864	68.5177	16.116	55.5311	35.8235	94.2148	27.0568	60.6358	93.2536	31.7632	62.5084	56.8713		0	42.668	2217900000	938800000	1279100000	8.79802	8.5358	8.74809	8.69111	0.658301	0.352754	0.652704	0.769965	-0.107337	0.295253	0.115832	0.105812	1.07724	0.81493	0.92285	0.929282
	NTMT1	N-terminal Xaa-Pro-Lys N-methyltransferase 1;N-terminal Xaa-Pro-Lys N-methyltransferase 1, N-terminally processed					0	0	0	0	0	YES	54.3154	91.8433	73.0793	69.0806	40.6826	54.8816	47.8845	52.3202	50.1024	47.2004	50.0761	48.6382	56.6754		0	9.6386	2324200000	1146600000	1177600000	8.56445	8.52094	8.48171	8.49482	0.66065	0.537182	0.964865	0.548197	-0.106607	-0.137854	0.0060466	0.238665	1.07669	1.10027	0.995818	0.847529
	UBE2K	Ubiquitin-conjugating enzyme E2 K					0	0	0	0	0	YES	26.2471	71.954	49.1005	0	16.1279	8.06393	61.0367	89.4965	75.2666	110.202	76.4161	93.3092	56.4351		0	15.326	1632300000	717960000	914340000	8.4222	7.68493	8.72705	8.73493	0.542189	0.62474	0.735599	0.850752	0.131985	0.189793	0.0835197	0.0712136	0.912575	0.876732	0.943752	0.951837
	SRSF11	Serine/arginine-rich splicing factor 11					0	0	0	0	0	YES	53.7622	47.5798	50.671	99.0769	116.073	107.575	25.8392	42.9573	34.3983	26.3133	39.605	32.9592	56.4008		0	8.7765	2234500000	925640000	1308800000	8.58321	8.82281	8.60772	8.40087	0.0099899	0.0936273	0.161511	0.553301	0.498251	0.394185	0.389126	0.235972	0.707965	0.760919	0.763592	0.849113	+
	C11orf58;SMAP	Small acidic protein					0	0	0	0	0	YES	81.364	82.5441	81.9541	77.9015	70.6736	74.2875	30.7432	46.2688	38.506	34.9429	25.8387	30.3908	56.2846		0	67.017	1602000000	701420000	900610000	8.70164	8.71074	8.41827	8.34005	0.0647527	0.217861	0.939453	0.807968	0.355016	0.289716	0.016211	0.112767	0.781861	0.818063	0.988826	0.924813
	PPP5C	Serine/threonine-protein phosphatase;Serine/threonine-protein phosphatase 5					0	0	0	0	0	YES	74.3531	62.0618	68.2075	85.6379	50.3484	67.9932	41.9328	49.4707	45.7017	64.1484	22.1839	43.1661	56.2671		0	29.591	2193300000	997290000	1196000000	8.55144	8.65698	8.49506	8.49589	0.153267	0.248319	0.466867	0.196789	0.27274	0.271426	0.223793	0.481816	0.827746	0.8285	0.856311	0.716076
	TCEB2	Transcription elongation factor B polypeptide 2					0	0	0	0	0	YES	34.245	22.2167	28.2309	15.3309	67.1992	41.265	85.7228	97.7041	91.7134	57.5945	69.8453	63.7199	56.2323		0	41.332	2627300000	1256400000	1370900000	8.17429	8.55167	8.71918	8.59071	0.251962	0.93192	0.957555	0.465053	0.263275	0.0106367	-0.0311204	0.251204	0.833194	0.992654	1.02181	0.840195
	DNAJC7	DnaJ homolog subfamily C member 7					0	0	0	0	0	YES	77.0953	49.6126	63.3539	77.6943	89.811	83.7527	47.3546	29.847	38.6008	39.03	39.0625	39.0463	56.1884		0	22.445	2176500000	939640000	1236800000	8.55182	8.6874	8.4657	8.50349	0.108955	0.462841	0.183902	0.15931	0.307079	0.172616	0.415326	0.475811	0.808277	0.887233	0.74985	0.719062
	FKBP5	Peptidyl-prolyl cis-trans isomerase FKBP5					0	0	0	0	0	YES	8.23113	8.37755	8.30434	75.8638	56.221	66.0424	87.4325	40.4715	63.952	93.5043	76.2189	84.8616	55.7901		0	36.149	1721600000	956690000	764890000	7.70899	8.62109	8.52205	8.58406	0.205153	9.99568e-07	0.0071367	0.0200727	0.345396	-1.09169	-0.94611	-0.916698	0.787092	2.13124	1.92667	1.88779		+
	GLRX	Glutaredoxin-1					0	0	0	0	0	YES	262.805	10.8047	136.805	16.3739	14.185	15.2795	34.5816	39.3065	36.9441	33.8897	33.2932	33.5915	55.655		0	12.908	1444400000	726790000	717630000	8.8494	7.91533	8.32352	8.26832	0.764159	0.608781	0.0875076	0.216693	0.0511633	-0.151202	-0.603797	-0.537173	0.965158	1.11049	1.51971	1.45113
	PPP1R7	Protein phosphatase 1 regulatory subunit 7					0	0	0	0	0	YES	41.7972	48.7726	45.2849	31.0455	32.8298	31.9376	31.6386	93.4014	62.52	79.6977	84.2864	81.992	55.4336		0	32.339	1767600000	895200000	872450000	8.30237	8.19758	8.55741	8.6524	0.375604	0.6158	0.633191	0.492858	-0.260359	-0.10566	0.123666	-0.264201	1.19778	1.07599	0.917852	1.20097
	SBDS	Ribosome maturation protein SBDS					0	0	0	0	0	YES	65.104	50.7472	57.9256	25.5287	70.7968	48.1627	42.7844	42.5433	42.6639	63.3358	81.673	72.5044	55.3141		0	26.643	2026800000	968870000	1058000000	8.50983	8.54484	8.47276	8.61721	0.524108	0.935299	0.414114	0.883901	-0.151186	0.057277	0.252173	-0.0493524	1.11048	0.961076	0.839631	1.0348
	NUCKS1	Nuclear ubiquitous casein and cyclin-dependent kinase substrate 1					0	0	0	0	0	YES	26.7685	24.2428	25.5056	62.355	85.0822	73.7186	69.8456	69.8826	69.8641	57.379	45.8558	51.6174	55.1764		0.00036805	1.1584	1404100000	799460000	604640000	8.10599	8.49781	8.49131	8.37683	0.919909	0.00550635	0.0338354	0.352588	0.00733906	-0.740794	-0.747923	-0.397486	0.994926	1.6711	1.67937	1.31721		+
	GBA	Glucosylceramidase					0	0	0	0	0	YES	14.6259	76.1231	45.3745	113.544	114.203	113.874	39.9362	14.3386	27.1374	11.908	54.073	32.9905	54.844		0	1.9843	2243300000	1170000000	1073400000	8.36827	8.77868	8.20041	8.39538	0.184473	0.699207	0.600509	0.133729	-0.381367	-0.0862317	-0.190585	-0.657855	1.30258	1.06159	1.14123	1.57773
	FARSA	Phenylalanine--tRNA ligase alpha subunit					0	0	0	0	0	YES	65.0498	42.1038	53.5768	1.44444	35.497	18.4707	73.5884	140.999	107.294	36.6855	43.221	39.9533	54.8236		0	75.243	1581200000	671920000	909320000	8.3759	7.93728	8.85389	8.4139	0.525353	0.861835	0.334106	0.504825	-0.191524	0.0842003	0.264236	0.262072	1.14197	0.943307	0.832639	0.833889
	NRD1	Nardilysin					0	0	0	0	0	YES	75.1125	66.7341	70.9233	29.3739	56.9659	43.1699	66.576	32.8443	49.7101	55.8816	54.3526	55.1171	54.7301		0	18.758	2029900000	1030800000	999100000	8.55991	8.44261	8.54511	8.50763	0.742132	0.731201	0.810313	0.974242	0.0568609	-0.0614507	-0.0925248	0.0194884	0.961354	1.04351	1.06623	0.986582
	PMPCB	Mitochondrial-processing peptidase subunit beta					0	0	0	0	0	YES	105.45	88.5346	96.9923	86.0984	36.2382	61.1683	46.2841	30.382	38.3331	21.3901	22.6812	22.0357	54.6324		0	27.236	2306900000	1245700000	1061200000	8.63376	8.68181	8.34303	8.00886	0.12611	0.77942	0.0610767	0.0291701	-0.352142	-0.062505	-0.661068	-0.969226	1.27645	1.04428	1.58125	1.95779
	SUMF2	Sulfatase-modifying factor 2					0	0	0	0	0	YES	60.5311	108.999	84.7649	60.6857	72.2968	66.4912	11.1158	0	5.55792	60.8064	62.3258	61.5661	54.5951		0	13.979	1947100000	978000000	969090000	8.6028	8.59423	7.71482	8.5134	0.149403	0.79433	0.659503	0.845334	-0.332335	0.0612924	0.189287	-0.0688768	1.25905	0.958405	0.877039	1.0489
	UBE2D3;UBE2D2	Ubiquitin-conjugating enzyme E2 D2;Ubiquitin-conjugating enzyme E2 D3					0	0	0	0	0	YES	47.9166	51.9181	49.9174	87.196	75.302	81.249	28.9621	51.1812	40.0717	32.1964	60.8275	46.5119	54.4375		0	11.452	2343800000	1120300000	1223500000	8.37614	8.79248	8.62704	8.44529	0.937641	0.84745	0.571562	0.567863	0.00187425	-0.0429323	0.149129	0.228357	0.998702	1.03021	0.901795	0.853607
	DTYMK	Thymidylate kinase					0	0	0	0	0	YES	56.837	70.8737	63.8554	45.9465	39.3563	42.6514	62.2432	44.7417	53.4925	75.4146	39.5432	57.4789	54.3696		0	12.35	1730100000	751350000	978760000	8.5189	8.44832	8.6043	8.56674	0.94977	0.750657	0.341908	0.2605	-0.0219509	0.123666	0.259785	0.382169	1.01533	0.917852	0.835213	0.767283
	QDPR	Dihydropteridine reductase					0	0	0	0	0	YES	68.2186	71.1986	69.7086	51.3513	59.7298	55.5406	39.4557	52.7026	46.0791	54.0104	38.0314	46.0209	54.3373		0	30.036	1359000000	616190000	742770000	8.52395	8.46878	8.47831	8.40255	0.778274	0.932327	0.593156	0.872722	0.0475383	0.0107799	0.16221	-0.0460271	0.967586	0.992556	0.893655	1.03242
	HMGCS1	Hydroxymethylglutaryl-CoA synthase, cytoplasmic					0	0	0	0	0	YES	103.986	93.3466	98.666	43.6686	54.1161	48.8923	53.8654	45.9035	49.8844	24.0958	15.4262	19.761	54.301		0	119.63	2839800000	951970000	1887900000	8.75328	8.74452	8.77613	8.63404	0.0690348	0.00104151	8.50116e-05	3.5263e-15	0.349365	0.770956	1.1169	2.62063	0.784929	0.586029	0.461084	0.162596		+
	SEPT7	Septin-7					0	0	0	0	0	YES	80.7193	14.059	47.3892	5.57176	16.1601	10.8659	34.6602	122.213	78.4368	23.6546	135.85	79.7522	54.111		0	54.841	1347200000	684010000	663220000	8.35328	7.97875	8.62341	8.5942	0.934165	0.709844	0.444645	0.733618	-0.039948	0.15056	0.206268	-0.126691	1.02808	0.900901	0.866776	1.09179
	GDA	Guanine deaminase					0	0	0	0	0	YES	53.1692	13.0181	33.0936	31.9611	97.1279	64.5445	79.6868	70.1018	74.8943	45.4224	42.2287	43.8256	54.0895		0	14.013	1955100000	768640000	1186500000	8.31748	8.63242	8.756	8.56648	0.179426	0.046237	0.151038	0.0111065	0.311503	0.468635	0.399445	0.851439	0.805802	0.722648	0.75815	0.554232		+
	STMN2	Stathmin;Stathmin-2					0	0	0	0	0	YES	100.73	0	50.365	51.6782	60.3545	56.0164	65.4529	89.4883	77.4706	62.9056	0	31.4528	53.8262		0	2.9982	2657400000	910230000	1747200000	8.46811	8.58132	8.97303	8.39811	1	0.00441757	5.49563e-05	1	NaN	0.669299	1.14672	NaN	NaN	0.628812	0.451651	NaN		+
	RALA	Ras-related protein Ral-A					0	0	0	0	0	YES	38.1532	54.7555	46.4543	17.3617	52.4599	34.9108	41.0657	57.0629	49.0643	90.6364	77.5937	84.115	53.6361		0	6.5818	1981800000	1095000000	886820000	8.30747	8.45481	8.50206	8.50687	0.952275	0.043762	0.030346	0.0012894	-0.00262814	-0.528677	-0.763097	-1.2723	1.00182	1.44261	1.69713	2.41546		+
	PPP1CA	Serine/threonine-protein phosphatase PP1-alpha catalytic subunit;Serine/threonine-protein phosphatase					0	0	0	0	0	YES	44.638	37.4436	41.0408	84.9625	72.0959	78.5292	39.416	52.6401	46.028	46.2319	51.5721	48.902	53.625		0	14.731	2117100000	1044600000	1072500000	8.39005	8.61697	8.48184	8.4764	0.831196	0.92097	0.486144	0.907547	0.03492	0.0233263	0.213876	-0.0258966	0.976086	0.983961	0.862218	1.01811
	ARHGAP18	Rho GTPase-activating protein 18					0	0	0	0	0	YES	53.494	105.071	79.2823	86.1675	65.2123	75.6899	36.703	44.3447	40.5239	12.8452	25.1259	18.9856	53.6204		0	34.792	1775900000	930860000	845070000	8.61818	8.65892	8.43451	8.24405	0.0319696	0.41922	0.680704	0.0156971	-0.490639	0.189919	-0.151474	0.878137	1.40507	0.876655	1.1107	0.54407	+
	GORASP2	Golgi reassembly-stacking protein 2					0	0	0	0	0	YES	46.7115	65.8616	56.2865	0	61.7218	30.8609	53.816	69.6528	61.7344	78.6947	49.5843	64.1395	53.2553		0	17.17	1552500000	813800000	738690000	8.3921	8.54295	8.53905	8.51921	0.227339	0.300465	0.492618	0.360952	-0.348482	-0.254702	-0.239174	-0.35487	1.27322	1.19309	1.18032	1.27887
	NAA15	N-alpha-acetyltransferase 15, NatA auxiliary subunit					0	0	0	0	0	YES	41.9476	100.84	71.3939	51.1218	37.7368	44.4293	53.8986	37.4084	45.6535	38.1947	63.6009	50.8978	53.0936		0	28.103	1597900000	683610000	914270000	8.66472	8.44056	8.55742	8.58145	0.674534	0.652655	0.250333	0.728876	-0.10231	0.160791	0.317072	0.123799	1.07349	0.894534	0.802697	0.917768
	DBNL	Drebrin-like protein					0	0	0	0	0	YES	20.1715	28.288	24.2297	98.9848	67.2109	83.0979	55.8863	56.3501	56.1182	51.7725	45.6982	48.7354	53.0453		0.00069759	0.56331	6551800	3707300	2844400	NaN	NaN	6.56796	NaN	1	1	1	1	NaN	NaN	NaN	NaN	NaN	NaN	NaN	NaN
	ARFGAP1	ADP-ribosylation factor GTPase-activating protein 1					0	0	0	0	0	YES	52.1034	63.7721	57.9377	50.1125	41.393	45.7528	53.09	60.5303	56.8101	50.938	50.8633	50.9006	52.8503		0	30.006	1460400000	811500000	648910000	8.37299	8.30955	8.48342	8.40656	0.0493137	0.152278	0.650799	0.433449	-0.556605	-0.365332	-0.165823	-0.330665	1.4708	1.28818	1.12181	1.25759	+
	MYO1E	Unconventional myosin-Ie					0	0	0	0	0	YES	102.601	131.82	117.21	61.5368	38.3746	49.9557	24.5427	17.301	20.9218	11.2216	32.0752	21.6484	52.434		0	30.168	1685500000	745000000	940490000	8.83626	8.4715	8.24135	8.31813	0.501089	0.137916	0.41651	0.327342	-0.159235	0.450802	0.25084	0.372172	1.11669	0.731636	0.840407	0.772618
	ABCF2	ATP-binding cassette sub-family F member 2					0	0	0	0	0	YES	77.116	69.2549	73.1854	98.3017	92.421	95.3614	20.3072	26.9114	23.6093	10.337	24.3087	17.3228	52.3697		0	39.279	2105800000	1056400000	1049300000	8.54094	8.94687	8.14857	8.10585	0.508259	0.63416	0.757326	0.696809	-0.156707	-0.106203	0.090447	0.1644	1.11474	1.07639	0.939232	0.892299
	PDXDC1	Pyridoxal-dependent decarboxylase domain-containing protein 1					0	0	0	0	0	YES	55.3478	14.0311	34.6894	64.9392	49.4423	57.1907	23.4391	38.3916	30.9153	90.4045	80.588	85.4962	52.0729		0	36.366	2336900000	1262800000	1074100000	8.26005	8.46601	8.16859	8.62217	0.887702	0.999199	0.0696544	0.235671	-0.0560262	0.0347792	-0.640569	-0.463271	1.0396	0.976181	1.55894	1.37866
	CHORDC1	Cysteine and histidine-rich domain-containing protein 1					0	0	1	0	0	NO	0	45.7169	22.8585	0	0	0	86.3791	95.7882	91.0837	82.6909	105.344	94.0175	51.9899		0	62.197	5748000000	2680500000	3067500000	8.9359	8.9434	9.07915	9.02164	0.287254	0.990191	0.632536	0.274364	0.201258	-0.00274375	0.123931	0.371503	0.869792	1.0019	0.917684	0.772977
	TRNT1	CCA tRNA nucleotidyltransferase 1, mitochondrial					0	0	0	0	0	YES	118.289	52.777	85.5331	10.8364	0	5.41818	72.1614	32.9426	52.552	64.8606	63.6595	64.26	51.9408		0	10.604	1726900000	837330000	889620000	8.70264	7.77331	8.63135	8.63433	0.51816	0.937542	0.732392	0.576808	0.119157	0.0521377	0.0847447	0.193961	0.920726	0.964506	0.942951	0.874202
	SPR	Sepiapterin reductase					0	0	0	0	0	YES	77.6134	76.4328	77.0231	54.8718	40.2075	47.5397	27.2386	51.0472	39.1429	27.589	59.5643	43.5767	51.8206		0	20.525	1714100000	717680000	996440000	8.58853	8.5081	8.51813	8.5401	0.645091	0.498533	0.0764441	0.717831	0.0827026	0.224411	0.556405	0.128689	0.944287	0.855945	0.679995	0.914662
	FEN1	Flap endonuclease 1					0	0	0	0	0	YES	74.6317	65.7248	70.1783	55.0407	75.6759	65.3583	75.0867	33.1496	54.1181	27.2019	7.6245	17.4132	51.767		0	25.386	1956200000	861450000	1094800000	8.58956	8.64731	8.61933	8.24915	0.903411	0.0122541	0.510214	0.00590096	0.0160683	0.5889	0.175812	0.996967	0.988924	0.664849	0.885269	0.501052		+
	RBM8A	RNA-binding protein 8A					0	0	0	0	0	YES	56.2026	69.3455	62.7741	27.6708	92.575	60.1229	65.3783	25.8593	45.6188	51.7012	23.5658	37.6335	51.5373		0	22.821	1958700000	985890000	972830000	8.50307	8.68564	8.57889	8.51644	0.447498	0.862321	0.459369	0.878523	0.141433	-0.0387027	-0.256838	0.0594937	0.906618	1.02719	1.19486	0.959601
	ECI1;DCI	Enoyl-CoA delta isomerase 1, mitochondrial					0	0	0	0	0	YES	57.4436	12.2543	34.8489	70.0477	75.1773	72.6125	17.7944	55.7445	36.7695	69.4391	54.2757	61.8574	51.5221		0	15.735	2401500000	1178700000	1222800000	8.333	8.75101	8.36027	8.5891	0.762074	0.885653	0.945517	0.781268	0.0568609	-0.0320937	0.0137839	-0.101753	0.961354	1.02249	0.990491	1.07308
	NDRG3	Protein NDRG3					0	0	0	0	0	YES	76.718	75.4614	76.0897	51.3405	51.3023	51.3214	48.5401	28.7933	38.6667	46.2561	30.759	38.5076	51.1463		0	34.757	1825700000	997940000	827800000	8.50256	8.4577	8.33656	8.30861	0.0514929	0.893682	0.982428	0.952906	-0.446187	-0.00283043	-0.0156659	0.0479571	1.36243	1.00196	1.01092	0.967305
	TCEA1	Transcription elongation factor A protein 1					0	0	0	0	0	YES	30.0359	50.2963	40.1661	42.7629	52.2458	47.5044	85.2366	70.6286	77.9326	31.1676	46.3563	38.762	51.0913		0	20.874	1756300000	889600000	866710000	8.38437	8.60547	8.57936	8.37311	0.329413	0.576975	0.25186	0.48208	0.221568	-0.124487	-0.390283	0.274769	0.857633	1.09012	1.31065	0.826583
	SEC24A	Protein transport protein Sec24A					0	0	0	0	0	YES	63.1602	66.3405	64.7504	0	23.1646	11.5823	43.3533	74.0245	58.6889	55.9709	81.4512	68.7111	50.9332		0	11.81	1371200000	691770000	679410000	8.49696	7.7783	8.55633	8.54607	0.627385	1	0.394776	0.387603	-0.117052	NaN	-0.293359	-0.335135	1.08452	NaN	1.22549	1.2615
	COPS3	COP9 signalosome complex subunit 3					0	0	0	0	0	YES	79.9552	63.4699	71.7126	32.5429	27.3077	29.9253	68.9964	43.9437	56.47	50.2626	40.0382	45.1504	50.8146		0	106.85	2418600000	787010000	1631600000	8.51951	8.23882	9.07232	8.47385	0.865121	0.975644	0.764646	0.637096	0.0255958	0.0430645	-0.112038	0.19333	0.982415	0.970591	1.08075	0.874585
	DFFA	DNA fragmentation factor subunit alpha					0	0	0	0	0	YES	93.0409	21.771	57.406	148.658	40.8336	94.7456	31.3801	29.696	30.5381	21.2569	19.5404	20.3986	50.7721		0	17.381	2131900000	985500000	1146400000	8.625	8.87642	8.34294	8.15588	0.66415	0.416793	0.4774	0.551906	0.0775164	-0.181215	0.218347	0.236707	0.947688	1.13384	0.85955	0.84868
	GCSH	Glycine cleavage system H protein, mitochondrial					0	0	0	0	0	YES	58.9989	52.0163	55.5076	70.4153	45.2567	57.836	46.4422	61.3819	53.912	30.8087	40.4896	35.6492	50.7262		0	112.99	1434100000	658260000	775870000	8.43037	8.51767	8.50492	8.35239	0.691675	0.588338	0.825011	0.54658	0.0798389	0.186374	-0.0850834	0.23952	0.946163	0.878812	1.06075	0.847027
	ZRANB2	Zinc finger Ran-binding domain-containing protein 2					0	0	0	0	0	YES	47.7216	28.7216	38.2216	27.5411	24.8318	26.1864	47.4761	69.3208	58.3985	63.9196	96.2764	80.098	50.7261		0	17.414	1242000000	656850000	585130000	8.32748	8.0728	8.50458	8.62503	0.575959	0.0589848	0.632898	0.326656	0.119688	-0.492911	-0.17454	-0.381667	0.920387	1.40728	1.1286	1.30285
	SLC38A2	Sodium-coupled neutral amino acid transporter 2					0	0	0	0	0	YES	0	15.6182	7.8091	59.2612	37.3225	48.2919	11.7746	108.51	60.1421	81.5783	91.3109	86.4446	50.6719		0	20.566	2502100000	957570000	1544500000	8.02407	8.65459	8.52421	8.72953	3.50972e-14	0.000111649	0.221812	0.802118	1.83859	0.908429	-0.433993	0.0919367	0.279595	0.532765	1.35097	0.938262	+	+
	TOM1	Target of Myb protein 1					0	0	0	0	0	YES	37.5881	74.8117	56.1999	11.2048	90.8081	51.0064	64.2374	53.9341	59.0858	72.1628	0	36.0814	50.5934		0	21.427	1336100000	744190000	591940000	8.32498	8.53316	8.49559	8.26031	0.742641	0.163835	0.478859	0.20472	-0.107368	-0.354372	-0.254909	-0.552177	1.07726	1.27843	1.19326	1.4663
	GYG1	Glycogenin-1					0	0	0	0	0	YES	27.1609	48.027	37.5939	12.9838	74.3635	43.6737	93.0804	60.0156	76.548	71.6488	16.9579	44.3033	50.5297		0	9.5991	1657600000	817980000	839620000	8.46352	8.62941	8.65543	8.41482	0.327089	0.17971	0.553914	0.324885	0.184725	-0.299418	-0.208194	-0.422559	0.879817	1.23065	1.15524	1.3403
	NUP62	Nuclear pore glycoprotein p62					0	0	0	0	0	YES	66.1682	30.0277	48.098	37.1794	33.5578	35.3686	83.4215	67.4422	75.4319	75.3621	10.2145	42.7883	50.4217		0	24.905	1611700000	774610000	837100000	8.4393	8.46474	8.6411	8.37667	0.739788	0.748216	0.695885	0.849866	0.0640551	-0.0551565	-0.142115	0.0938305	0.956572	1.03897	1.10352	0.937032
	TIMM9	Mitochondrial import inner membrane translocase subunit Tim9					0	0	0	0	0	YES	68.9262	48.0768	58.5015	75.3219	26.0914	50.7067	64.5761	35.6208	50.0984	55.978	28.5044	42.2412	50.387		0	13.735	1492500000	683820000	808650000	8.49452	8.44251	8.61264	8.51713	0.0515616	0.24658	0.695882	0.952297	0.374622	0.359634	0.0988237	-0.0150389	0.771307	0.779362	0.933794	1.01048
	PDLIM7	PDZ and LIM domain protein 7					0	0	0	0	0	YES	21.964	63.8393	42.9017	28.1366	62.974	45.5553	53.1783	60.4288	56.8035	79.0551	31.6397	55.3474	50.152		0	16.721	1541500000	754980000	786470000	8.42669	8.50622	8.56813	8.58652	0.22667	0.865049	0.605068	0.794375	-0.34896	-0.0129702	0.135141	-0.0949726	1.27364	1.00903	0.910581	1.06805
	DAZAP1	DAZ-associated protein 1					0	0	0	0	0	YES	21.2229	57.5271	39.375	63.0887	123.081	93.0851	23.0363	26.741	24.8886	63.7448	21.837	42.7909	50.0349		0	23.288	2806000000	1293400000	1512700000	8.41149	8.70962	8.17132	8.50365	0.841322	0.107255	0.740442	0.908775	-0.0722098	-0.359453	-0.123497	-0.0368367	1.05133	1.28294	1.08937	1.02586
	TUBB3	Tubulin beta-3 chain					0	0	0	0	0	YES	21.059	37.9566	29.5078	44.5128	72.1523	58.3326	34.7332	45.9806	40.3569	90.0801	52.8558	71.4679	49.9163		0	38.248	1894800000	1003800000	890970000	8.18239	8.52026	8.37412	8.71306	0.510664	0.535347	0.964871	0.135511	-0.197749	-0.138632	-0.0233431	-0.58541	1.14691	1.10086	1.01631	1.50047
	ECI2	Enoyl-CoA delta isomerase 2, mitochondrial					0	0	0	0	0	YES	69.5335	26.6722	48.1029	120.697	95.5883	108.143	13.678	39.3406	26.5093	19.4688	13.4614	16.4651	49.805		0	19.983	1986400000	1023100000	963220000	8.42898	8.90425	8.32187	8.08892	0.750655	0.348145	0.731359	0.639913	-0.104465	-0.209378	0.101381	0.191942	1.0751	1.15619	0.93214	0.875427
	AP1B1	AP-1 complex subunit beta-1					0	0	0	0	0	YES	31.9065	77.4224	54.6644	54.9309	33.2645	44.0977	56.409	39.1604	47.7847	68.06	37.135	52.5975	49.7861		0	35.003	1875300000	967970000	907340000	8.38308	8.4209	8.45832	8.58153	0.102228	0.286381	0.829419	0.710404	-0.4656	-0.263265	-0.0831107	-0.139029	1.38089	1.20019	1.0593	1.10116
	FUS	RNA-binding protein FUS					0	0	1	0	0	NO	28.4679	0	14.2339	0	0	0	120.007	93.4744	106.741	73.871	82.3065	78.0888	49.7659		0	32.045	2259700000	818410000	1441300000	8.1442	NaN	8.83004	8.96495	1	1	0.59377	0.792972	NaN	NaN	-0.188956	-0.0956971	NaN	NaN	1.13994	1.06858
	SF3B4	Splicing factor 3B subunit 4					0	0	0	0	0	YES	83.2505	60.9416	72.096	127.382	39.434	83.4082	34.3791	22.6729	28.526	5.05235	23.4787	14.2655	49.5739		0	18.403	2604200000	1349100000	1255100000	8.61283	8.47198	8.20238	7.86584	0.371708	1	0.749945	0.600461	-0.208878	NaN	-0.119119	-0.249668	1.15579	NaN	1.08607	1.18893
	GFM1	Elongation factor G, mitochondrial					0	0	0	0	0	YES	52.5348	38.8789	45.7069	75.2168	54.5699	64.8933	53.3095	33.6253	43.4674	45.6011	41.8771	43.7391	49.4517		0	28.852	1723800000	887780000	836020000	8.34003	8.55277	8.40557	8.42799	0.244869	0.977407	0.712444	0.786404	-0.336318	0.0265876	-0.136506	0.122606	1.26253	0.98174	1.09924	0.918527
	PITRM1	Presequence protease, mitochondrial					0	0	0	0	0	YES	67.2197	48.6381	57.9289	23.7903	69.4947	46.6425	58.7727	40.3359	49.5543	47.2098	38.4979	42.8538	49.2449		0	25.495	2157500000	1109000000	1048400000	8.44657	8.46106	8.47922	8.33608	0.191065	0.525383	0.147625	0.1064	-0.302119	-0.142879	-0.512884	-0.710402	1.23295	1.10411	1.4269	1.63626
	TCERG1	Transcription elongation regulator 1					0	0	0	0	0	YES	56.213	47.6969	51.9549	24.3912	52.9005	38.6459	98.1124	38.2909	68.2017	46.0469	30.1896	38.1183	49.2302		0	29.626	2033300000	879270000	1154000000	8.58972	8.15561	8.69656	8.46312	0.202927	0.641438	0.370891	0.279947	0.242328	0.165172	0.243791	0.407733	0.84538	0.891822	0.844523	0.753807
	BAIAP2L1	Brain-specific angiogenesis inhibitor 1-associated protein 2-like protein 1					0	0	0	0	0	YES	38.7215	77.1656	57.9436	0	95.7935	47.8968	46.5248	30.3276	38.4262	54.9586	49.9446	52.4516	49.1795		0	12.426	1194100000	585540000	608530000	8.54153	8.43715	8.33866	8.45066	0.197215	0.38862	0.409802	0.336689	-0.298087	-0.206295	-0.295394	-0.411714	1.22951	1.15372	1.22722	1.33026
	DNPH1	2-deoxynucleoside 5-phosphate N-hydrolase 1					0	0	0	0	0	YES	61.5699	51.7021	56.636	0	31.494	15.747	40.9231	64.9239	52.9235	64.6256	76.4675	70.5466	48.9633		0	13.961	1821600000	741630000	1079900000	8.67842	8.28688	8.7408	8.77853	0.0259547	0.123903	0.460379	0.0469633	0.429643	0.466236	0.198745	0.668028	0.742446	0.723851	0.871308	0.629366	+
	EIF3D	Eukaryotic translation initiation factor 3 subunit D					0	0	0	0	0	YES	49.4663	59.4405	54.4534	63.2253	0	31.6127	76.2	40.7857	58.4928	67.8429	33.903	50.873	48.858		0	27.706	1939900000	911680000	1028300000	8.45947	8.52463	8.60587	8.48722	0.29338	0.936402	0.69277	0.819748	0.19862	0.0122111	0.100036	0.10742	0.871384	0.991572	0.93301	0.928247
	NOLC1	Nucleolar and coiled-body phosphoprotein 1					0	0	0	0	0	YES	35.7351	36.1103	35.9227	75.6197	46.5199	61.0698	24.9163	50.3547	37.6355	65.0338	54.9243	59.9791	48.6518		0	28.751	1969600000	740600000	1229000000	8.34862	8.72338	8.60952	8.69148	0.00182327	0.0159626	0.00430812	0.0992531	0.746227	0.566572	0.807602	0.555816	0.596161	0.675219	0.571331	0.680272	+	+
	PRKAR1A	cAMP-dependent protein kinase type I-alpha regulatory subunit;cAMP-dependent protein kinase type I-alpha regulatory subunit, N-terminally processed					0	0	0	0	0	YES	56.0212	47.7422	51.8817	14.056	0	7.02802	90.5847	16.1019	53.3433	137.095	27.3133	82.204	48.6142		0	53.587	1431800000	681330000	750450000	8.52282	7.82439	8.59372	8.69099	0.627308	0.687351	0.68006	0.656707	0.0875986	-0.113364	0.105008	0.156267	0.941088	1.08175	0.9298	0.897344
	PEPD	Xaa-Pro dipeptidase					0	0	0	0	0	YES	63.5009	65.0397	64.2703	12.0728	6.33677	9.20479	52.8623	49.3627	51.1125	43.679	95.2944	69.4867	48.5186		0	14.568	1365100000	647230000	717910000	8.57373	7.73269	8.55168	8.55453	0.824045	0.73851	0.896623	0.528605	0.0359054	-0.0896204	0.0237521	-0.242055	0.975419	1.06409	0.983671	1.18268
	PODXL	Podocalyxin					0	0	0	0	0	YES	61.5762	65.0714	63.3238	36.4863	44.1291	40.3077	56.9503	55.7169	56.3336	30.909	36.465	33.687	48.413		0	4.3858	1281400000	680130000	601270000	8.43662	8.2804	8.45867	8.31948	0.1895	0.0462513	0.192378	0.785537	-0.377238	-0.522178	-0.462535	0.123004	1.29885	1.43612	1.37796	0.918274		+
	TNIK;MAP4K4;MINK1	TRAF2 and NCK-interacting protein kinase;Mitogen-activated protein kinase kinase kinase kinase 4;Misshapen-like kinase 1					0	1	1	0	0	NO	0	0	0	0	0	0	378.642	0	189.321	7.61927	0	3.80964	48.2827		0.00072046	0.94065	1418800000	517410000	901410000	NaN	NaN	9.12988	7.23325	1	1	0.323942	1	NaN	NaN	-0.337867	NaN	NaN	NaN	1.26389	NaN
	DYNC1LI2	Cytoplasmic dynein 1 light intermediate chain 2					0	0	0	0	0	YES	18.3312	59.3982	38.8647	49.8539	34.0857	41.9698	40.7667	44.3391	42.5529	70.2579	68.3177	69.2878	48.1688		0	80.67	1358200000	648640000	709610000	8.28988	8.34207	8.44	8.60053	0.363489	0.890097	0.904774	0.597364	0.205267	0.0732718	0.0301242	-0.201477	0.867378	0.95048	0.979336	1.14987
	UROD	Uroporphyrinogen decarboxylase					0	0	0	0	0	YES	114.564	100.855	107.71	15.5504	10.987	13.2687	32.8508	71.0841	51.9674	18.8004	19.4921	19.1462	48.023		0	16.067	1354100000	609230000	744890000	8.71978	7.92722	8.71436	8.14317	0.989657	0.499463	0.105569	0.17549	-0.0106866	-0.207778	0.451963	0.504366	1.00743	1.15491	0.731048	0.70497
[truncated: 1,822 more rows]
[truncated: 7 more columns]

## Sheet: B) top 500 only - annotated 
	Gene names	Protein names	category	top 500 (0)	top 500 (1)	top 500 (3)	top 500 (7)	Values at all days?	LFQ day 0 (AVG) (ppm)	LFQ day 1 (AVG) (ppm)	LFQ day 3 (AVG) (ppm)	LFQ day 7 (AVG) (ppm)	LFQ AVG total (ppm)	day0/day0 (LFQ)	day1/day0 (LFQ)	day3/day0 (LFQ)	day7/day0 (LFQ)	L0/H0 (SILAC)	L1/H0 (SILAC)	L3/H0 (SILAC)	L7/H0 (SILAC)	Ratio H/L normalized H0_L0 B significant	Ratio H/L normalized H0_L1 B significant	Ratio H/L normalized H0_L3 B significant	Ratio H/L normalized H0_L7 B significant	Gene names
[truncated: 608 more rows]

[truncated: 3 more sheets: C) top 500 annotated & sorted, D) categories whole proteome, E) ER proteome]
