# Supplementary material for: Ratiometric sensing of BiP-client versus BiP levels by the unfolded protein response determines its signaling amplitude
Source: eLife journal article supplement (doi:10.7554/elife.27518), 2017-12-18
Supplement: supp [file elife-27518-supp-v1.zip › elife_poa_e27518_Supplementary_File_2.xlsx]

## Sheet: Supplementary File 2A
	Supplementary File 2A: list of cell lines
				transgene
	HeLa cell line	clone	inducibility	Tet-driven	Mif-driven	parental	lentiviral plasmid	plasmid source
	S3	-	-	-	-	HeLa	-
	TetON	3B10	Tet	-	-	Hela-S3	p1379 ***	B. Gendtner
	TetON-MifON*	TM3	Tet-Mif	-	-	3B10	pSwitch****	F. Park
	µs (Hi)**	3.7	Tet-Mif	-	µs	TM3	pRL091	this work
	µs (Me)	3.6	Tet-Mif	-	µs	TM3	pRL091	this work
	µs (Lo)	3.12	Tet-Mif	-	µs	TM3	pRL091	this work
	µsl (µ>l)	9.5	Tet-Mif	-	µs, l	3.7	pRL110	this work
	µsl (µ=l)	9.11	Tet-Mif	-	µs, l	3.7	pRL110	this work
	µsl (µ<l)	9.3	Tet-Mif	-	µs, l	3.7	pRL110	this work
	l	10.1	Tet-Mif	-	l	TM3	pRL110	this work
	µs IRE1α KO	µ910-6	Tet-Mif	-	µs	3.7	-	this work*****
	µs IRE1α-GFP	IG1	Tet-Mif	IRE1α-GFP	µs	µ910-6	pTetT-IRE1α-GFP	this work
	µs IRE1α-APEX2-KDEL	3.7 SRK6-10	Tet-Mif	APEX2-KDEL	µs	3.7	pSRK006	this work
	* referred to as "HeLa-MifON" in the main text
	** referred to as "Hi" in Figure 2A, and "HeLa-µs" elsewhere in the text
	*** contains a PGK bicistronic promoter that drives expression of rTTA and ∆LNGFR
	**** contains transactivator cassette of the GeneSwitch system (Invitrogen)
	***** deletion of IRE1a was done with CRISPR/Cas9 using the pX459v2-910 vector
	containing gRNA sequence: TCTTGCTTCCAAGCGTATACAGG; gift from Dr Andrew Bassett

## Sheet: Supplementary File 2B
	Supplementary File 2B: list of antibodies
	catalog #	manufacturer	antibody	clone	type	target	dilution	secondary Ab
	A-21045	Life Technologies	Alexa fluor-546 goat-a-mouse IgM	-	polyclonal	µ heavy chain	1:2500	-
	sc-1051	Santa Cruz Biotechnology	goat-a-human GRP78	C-20	polyclonal	BiP (GRP78)	1:1000	A21469
	3294	Cell Signaling technology	rabbit-a-human IRE1a	14C10	monoclonal	IRE1a	1:1000	NA934
	3192	Cell Signaling technology	rabbit-a-human PERK	CE3310	monoclonal	PERK	1:1000	A21244
	73-500	Bio Academya	mouse-a-human ATF6a	73-500	monoclonal	ATF6a	1:1000	G21040
	MA1-250	Thermo Fisher Scientific	mouse-a-human CHOP	9C8	monoclonal	CHOP	1:1000	G21040
	T-6074	Sigma	mouse-a-human tubulin	B-5-1-2	monoclonal	a-tubulin	1:8000	A11030
	A21469	Life Technologies	Alexa fluor-647 chicken-a-goat IgG	-	polyclonal	goat IgG	1:2000	-
	NA934	GE Healthcare	HRP-donkey-a-rabbit IgG	-	polyclonal	rabbit IgG	1:7000	-
	A21244	Life Technologies	Alexa fluor-647 goat-a-rabbit IgG	-	polyclonal	rabbit IgG	1:2000	-
	G21040	Invitrogen	HRP-goat-a-mouse IgG	-	polyclonal	mouse IgG	1:3000	-
	A11030	Life Technologies	Alexa fluor-546 goat-a-mouse IgG	-	polyclonal	mouse IgG	1:2000	-

## Sheet: Supplementary File 2C
	Supplementary File 2C: list of siRNAs
	Dharmacon catalog #	ON-Target plus siRNA	gene	target
	L-004951-02	2181	human ERN1	IRE1α
	L-004883-00	9451	human EIF2AK3	PERK
	L-009917-00	22926	human ATF6A	ATF6α
	L-009552-00	7494	human XBP1	XBP1
	D-001810-01	-	-	non targeting
